# Supplementary material for: NLRC5-Mediated Epigenetic and Proteomic Regulation of Microglial Panoptosis Drives Neuroinflammation in Multiple Sclerosis
Source: Research Square preprint supplement (doi:10.21203/rs.3.rs-6759227/v1), 2025-06-26
Supplement: Supplementary file 1 [file 16649c7b0001a08c6c8b7430.xlsx]

## Sheet: Sheet1
Apoptosis	Pyroptosis	Necroptosis
AATF	BAK1	GLUD1
ABL1	BAX	GLUD2
ACAA2	CASP1	ALOX15
ACKR3	CASP3	FTH1
ACVR1	CASP4	PYG
ACVR1B	CASP5	CAPN1
ADORA1	CASP6	CASP1
AEN	CASP8	GLNA
AGT	CASP9	BAX
AGTR2	CHMP2A	BCL2
AIFM1	CHMP2B	FADD
AKT1	CHMP3	RIPK1
ANXA6	CHMP4A	TNF
APAF1	CHMP4B	TNFRSF1A
APPL1	CHMP4C	TRADD
AR	CHMP6	TRAF2
ARHGEF2	CHMP7	PPIA
ARL6IP5	CYCS	CAPN2
ARMC10	ELANE	HSP90A
ARRB2	GPX4	IL1A
ASAH2	GSDMB	TNFSF6
ATF3	GSDMC	TNFRSF6
ATF4	GSDMD	CASP8
ATM	GSDME	JNK
ATP2A1	GZMB	JAK2
ATP2A3	HMGB1	CAMK2
ATP5IF1	IL18	IL1B
AVP	IL1A	IFNG
BAD	IL1B	STAT3
BAG3	IRF1	IRF9
BAG5	IRF2	TNFSF10
BAG6	NLRC4	TNFRSF10A
BAK1	NLRP1	TNFRSF10B
BAX	NLRP2	CFLAR
BBC3	NLRP3	XIAP
BCAP31	NLRP6	BID
BCL10	NLRP7	AIFM1
BCL2	NOD1	TRPM7
BCL2A1	PLCG1	IFNAR1
BCL2L1	PJVK	IFNAR2
BCL2L10	PRKACA	IFNGR1
BCL2L11	PYCARD	IFNGR2
BCL2L12	SCAF11	TLR3
BCL2L14	TINAP	TIRP
BCL2L2	TNF	IFNA
BCL3	TP53	IFNB
BCLAF1	TP63	TRIF
BDKRB2	AIM2	VDAC1
BDNF	GSDMA	SLC25A4S
BECN1	IL6	PPID
BID	NOD2	CYLD
BIK	TIRAP	RIPK3
BIRC6		MLKL
BLOC1S2		TRAF5
BMF		TLR4
BMP4		RBCK1
BMP5		HMGB1
BMPR1B		JAK1
BNIP3		JAK3
BNIP3L		TYK2
BOK		STAT1
BRCA1		STAT2
BRCA2		STAT4
BRSK2		STAT5A
BTK		STAT5B
CAAP1		STAT6
CASP1		H2A
CASP10		TNFAIP3
CASP12		RNF31
CASP2		CHMP2A
CASP3		CHMP2B
CASP4		VPS24
CASP5		CHMP4A
CASP8		CHMP4B
CASP8AP2		CHMP6
CASP9		VPS4
CAV1		CHMP1
CCAR2		CHMP5
CCK		SMPD1
CD14		PYCARD
CD24		NLRP3
CD27		ZBP1
CD28		IL33
CD38		FTL
CD3E		SQSTM1
CD44		VDAC2
CD5		VDAC3
CD70		CHMP7
CD74		PGAM5
CDIP1		BIRC2
CDKN1A		BIRC3
CDKN2D		EIF2AK2
CEBPB		PLA2G4
CFLAR		DNM1L
CHAC1		SPATA2
CHCHD10		FAF1
CHEK2		SHARPIN
CIB1		NOX2
CIDEB		USP21
CLU		PARP1
COA8		CHMP4C
COL2A1
CRADD
CREB3
CREB3L1
CRH
CRIP1
CSF2
CSNK2A1
CSNK2A2
CTH
CTNNA1
CTSC
CTTN
CUL1
CUL2
CUL3
CUL4A
CUL5
CX3CL1
CX3CR1
CXCL12
CYLD
CYP1B1
DAB2IP
DAP
DAP3
DAPK1
DAPK2
DAPK3
DAPL1
DAXX
DBH
DCC
DDIAS
DDIT3
DDIT4
DDX3X
DDX47
DDX5
DEDD
DEDD2
DELE1
DEPTOR
DIABLO
DIDO1
DNAJA1
DNAJC10
DNM1L
DPF2
DYRK2
E2F1
E2F2
EDA2R
EIF2AK3
ELL3
ENO1
EP300
EPHA2
EPO
ERBB3
ERCC6
ERN1
ERN2
ERO1A
ERP29
EYA1
EYA2
EYA3
EYA4
FADD
FAF1
FAIM
FAIM2
FAM162A
FAS
FASLG
FASTK
FBH1
FBXW7
FEM1B
FGA
FGB
FGF10
FGFR1
FGFR3
FGG
FHIT
FIGNL1
FIS1
FNIP2
FXN
FYN
FZD9
G0S2
GABARAP
GATA1
GATA4
GCLM
GDNF
GFRAL
GGCT
GHITM
GNAI2
GNAI3
GPER1
GPX1
GRINA
GSDME
GSK3A
GSK3B
GSKIP
GSTP1
GZMB
HDAC1
HERPUD1
HGF
HIC1
HIF1A
HINT1
HIP1
HIP1R
HIPK1
HIPK2
HMGB2
HMOX1
HNRNPK
HRAS
HRK
HSPA1A
HSPA1B
HSPB1
HTRA2
HTT
HYAL2
HYOU1
ICAM1
IFI16
IFI27
IFI27L1
IFI27L2
IFI6
IFNB1
IFNG
IGF1
IKBKE
IL12A
IL19
IL1A
IL1B
IL2
IL20RA
IL33
IL4
IL6R
IL7
INCA1
ING2
ING5
INHBA
INHBB
INS
ITGA6
ITGAM
ITGAV
ITM2C
ITPR1
ITPRIP
IVNS1ABP
JAK2
JMY
JUN
KDM1A
KITLG
KRT18
KRT8
LCK
LGALS12
LGALS3
LRRK2
LTBR
LY96
MADD
MAEL
MAGEA3
MAP2K5
MAP3K5
MAPK7
MAPK8
MAPK8IP1
MAPK8IP2
MAPK9
MARCHF7
MAZ
MCL1
MDM2
MELK
MFF
MIF
MIR132
MIR15A
MIR16-1
MIR17
MIR198
MIR21
MIR210
MIR221
MIR222
MIR26B
MIR27B
MIR449A
MKNK2
MLH1
MLLT11
MMP9
MNT
MOAP1
MPV17L
MSH2
MSH6
MSX1
MUC1
MUL1
MYBBP1A
NACC2
NANOS3
NBN
NCK1
NCK2
NDUFA13
NDUFS3
NFATC4
NFE2L2
NGF
NGFR
NKX3-1
NLE1
NME5
NMT1
NOC2L
NOG
NOL3
NONO
NOS3
NOX1
NR4A2
NUPR1
OPA1
P2RX4
P2RX7
P4HB
PAK2
PAK5
PARK7
PARP1
PARP2
PAWR
PCGF2
PDCD10
PDCD5
PDCD6
PDIA3
PDK1
PDK2
PDPK1
PDX1
PEA15
PELI3
PERP
PF4
PHIP
PHLDA3
PIAS4
PIDD1
PIH1D1
PIK3R1
PINK1
PLAGL2
PLAUR
PLEKHF1
PLSCR3
PMAIP1
PML
POLB
POU4F1
POU4F2
PPARD
PPIA
PPIF
PPM1F
PPP1CA
PPP1R13B
PPP1R15A
PPP2R1B
PPP3CC
PPP3R1
PRDX2
PRELID1
PRKCA
PRKCD
PRKDC
PRKN
PRKRA
PRODH
PSEN1
PSMD10
PSME3
PTEN
PTGIS
PTH
PTPMT1
PTPN1
PTPN2
PTPRC
PTTG1IP
PYCARD
QARS1
RACK1
RAF1
RB1
RB1CC1
RBCK1
RELA
RET
RFFL
RHOT1
RHOT2
RIPK1
RIPK3
RNF183
RNF186
RNF34
RNF41
RPL11
RPL26
RPS27L
RPS3
RPS6KB1
RPS7
RRP8
RTKN2
RTL10
S100A8
S100A9
SCG2
SCN2A
SCRT2
SELENOK
SELENOS
SENP1
SEPTIN4
SERINC3
SERPINE1
SFN
SFPQ
SFRP1
SFRP2
SGMS1
SGPL1
SGPP1
SH3RF1
SHH
SHISA5
SIAH1
SIAH2
SIRT1
SIVA1
SKIL
SLC25A5
SLC35F6
SLC9A3R1
SMAD3
SNAI1
SNAI2
SNW1
SOD1
SOD2
SORT1
SP100
SRC
SRPX
SST
SSTR3
ST20
STK11
STK24
STK25
STK3
STK4
STRADB
STX4
STYXL1
SYVN1
TAF9
TAF9B
TCF7L2
TERT
TFDP1
TFDP2
TFPT
TGFB1
TGFB2
TGFBR1
THBS1
TICAM1
TICAM2
TIMM50
TIMP3
TLR3
TLR4
TM2D1
TMBIM1
TMBIM6
TMC8
TMEM102
TMEM109
TMEM117
TMEM14A
TMEM161A
TNF
TNFAIP3
TNFRSF10A
TNFRSF10B
TNFRSF10C
TNFRSF12A
TNFRSF1A
TNFRSF1B
TNFRSF25
TNFSF10
TNFSF12
TOPORS
TP53
TP53BP2
TP63
TP73
TPD52L1
TPT1
TRADD
TRAF1
TRAF2
TRAF7
TRAP1
TRIAP1
TRIB3
TRIM32
TRIM39
TXNDC12
TYROBP
UACA
UBB
UBE2K
UBE4B
UBQLN1
UMOD
UNC5B
URI1
USP28
USP47
VDAC2
VNN1
WDR35
WNT4
WWOX
XBP1
YAP1
YBX3
YWHAB
YWHAE
YWHAG
YWHAH
YWHAQ
YWHAZ
ZC3HC1
ZDHHC3
ZMYND11
ZNF205
ZNF385A
ZNF385B
ZNF622
ZSWIM2
