# Supplementary material for: NLRC5-Mediated Epigenetic and Proteomic Regulation of Microglial Panoptosis Drives Neuroinflammation in Multiple Sclerosis
Source: Research Square preprint supplement (doi:10.21203/rs.3.rs-6759227/v1), 2025-06-26
Supplement: Supplementary file 2 [file 188b337d160e0f2c898e2675.xlsx]

## Sheet: Correlated methylation locus
DNA methylation locus of NLRC5	Number of SNP	Beta	Se	pvalue	OR	or_lci95	or_uci95	Heter.Stat	Heter.p	egger_intercept	egger_intercept_se	egger_intercept_pval
cg04097610	3	-0.122268	0.0591657	0.0387775	0.884911	0.788019	0.993716	0.0325231	0.98387	5.63965e-05	0.0284713	0.998739

## Sheet: Correlated SNPs
SNP	effect_allele.exposure	other_allele.exposure	effect_allele.outcome	other_allele.outcome	beta.exposure	beta.outcome	eaf.exposure	eaf.outcome	remove	palindromic	ambiguous	id.outcome	se.outcome	outcome	mr_keep.outcome	pval.outcome	pval_origin.outcome	data_source.outcome	se.exposure	pval.exposure	samplesize.exposure	chr.exposure	pos.exposure	exposure	mr_keep.exposure	pval_origin.exposure	id.exposure	data_source.exposure	action	SNP_index	mr_keep	samplesize.outcome	R2	f	meanf
rs16965039	C	T	C	T	0.216129	-0.0200967	0.0552	NA	FALSE	FALSE	FALSE	S76iTk	0.0375589	outcome	TRUE	0.5926	inferred	textfile	0.0194488	1.087e-28	26089	16	57047299	exposure	TRUE	reported	AaE7gM	textfile	2	1	TRUE	NA	0.00471121960715777	123.483343038806	326.148980872547
rs289748	G	A	G	A	0.126348	-0.016231	0.5117	NA	FALSE	FALSE	FALSE	S76iTk	0.0167973	outcome	TRUE	0.333901	inferred	textfile	0.0085898	5.63e-49	26642	16	57025063	exposure	TRUE	reported	AaE7gM	textfile	2	1	TRUE	NA	0.00805550114093784	216.341287885981	326.148980872547
rs62035537	A	G	A	G	0.376831	-0.0472652	0.1032	NA	FALSE	FALSE	FALSE	S76iTk	0.0269183	outcome	TRUE	0.0791096	inferred	textfile	0.014911	6.49e-141	23923	16	57042109	exposure	TRUE	reported	AaE7gM	textfile	2	1	TRUE	NA	0.0260029369991086	638.622311692852	326.148980872547
