# Supplementary material for: NLRC5-Mediated Epigenetic and Proteomic Regulation of Microglial Panoptosis Drives Neuroinflammation in Multiple Sclerosis
Source: Research Square preprint supplement (doi:10.21203/rs.3.rs-6759227/v1), 2025-06-26
Supplement: Supplementary file 3 [file 32a917668d0e68e296724a45.docx]

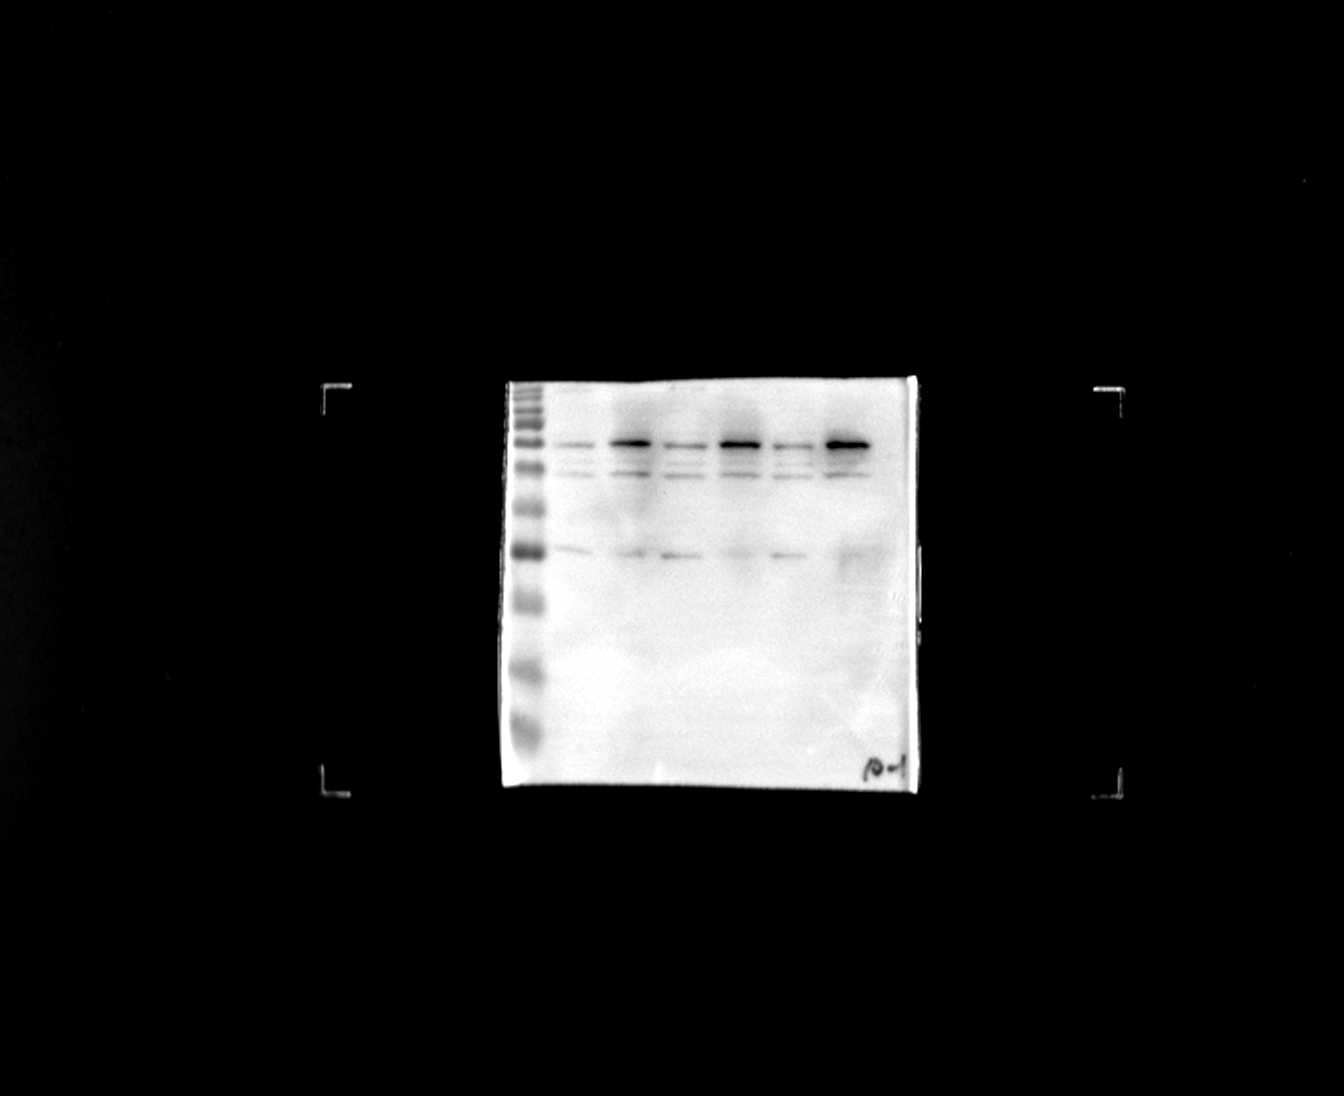

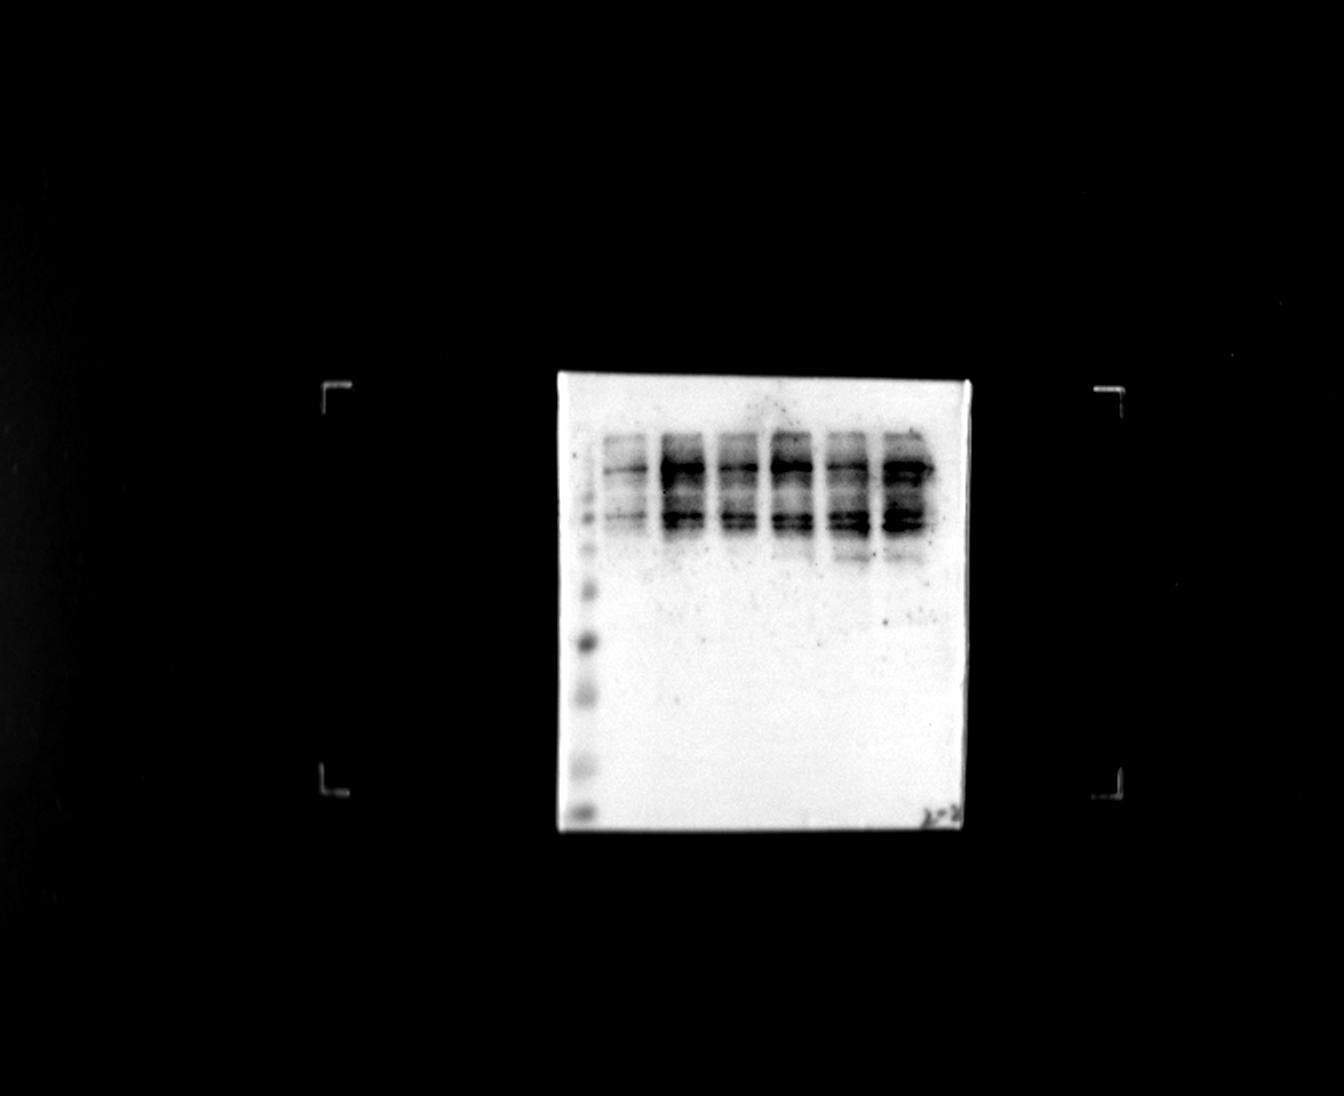


b

a

ZBP1

68kDa

Control EAE Control EAE Control EAE

NLRC5

154kDa

Control EAE Control EAE Control EAE

d

c


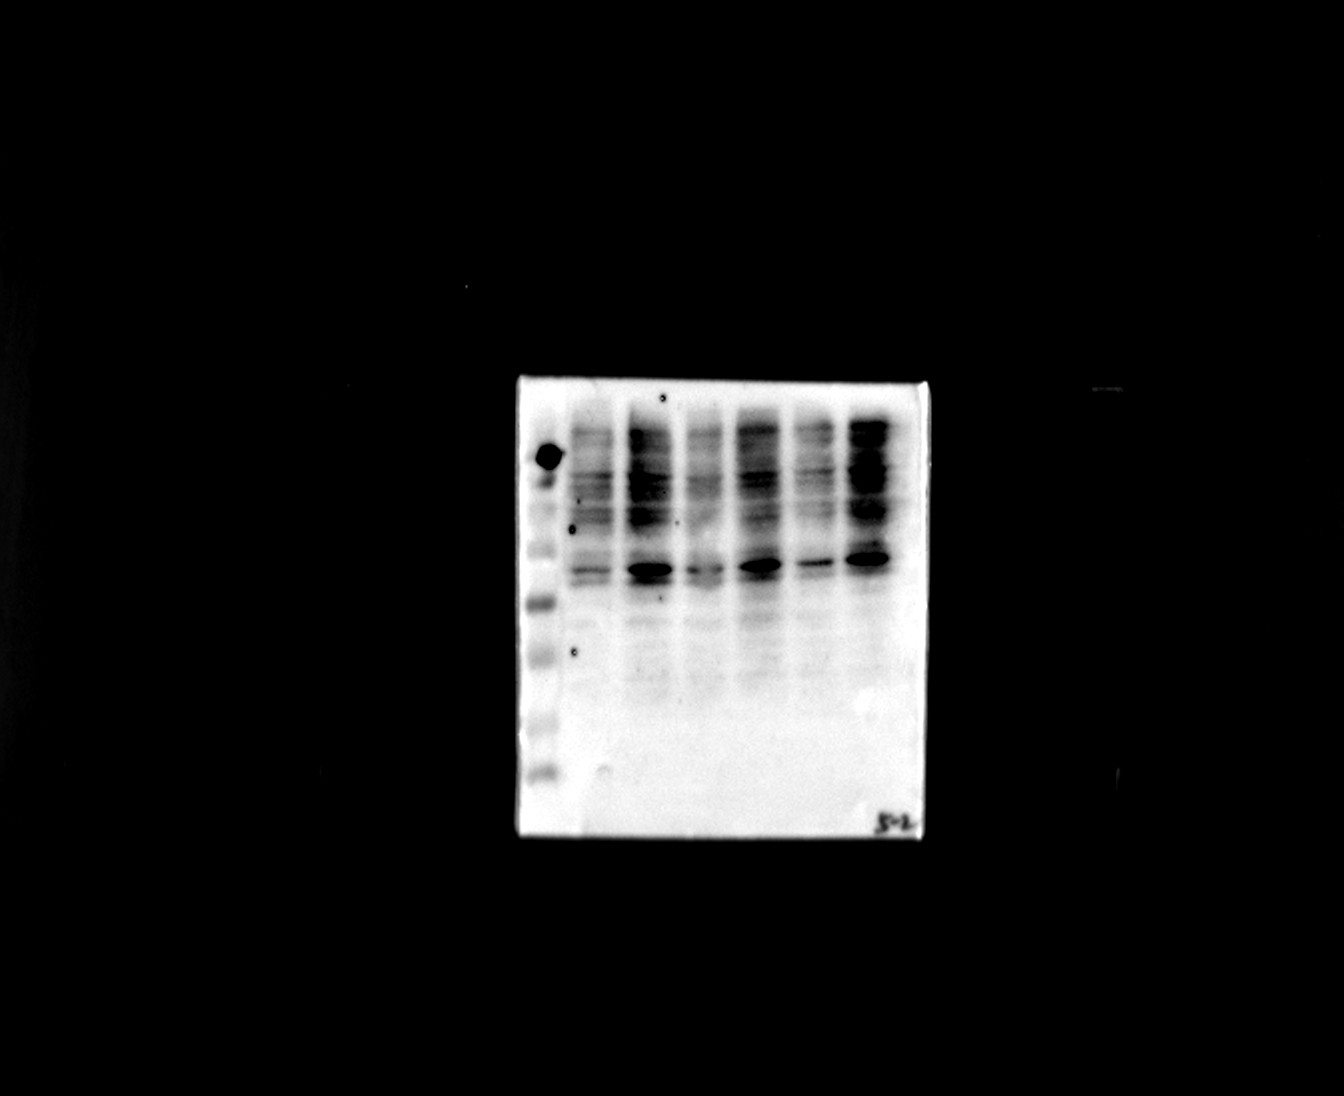


Control EAE Control EAE Control EAE


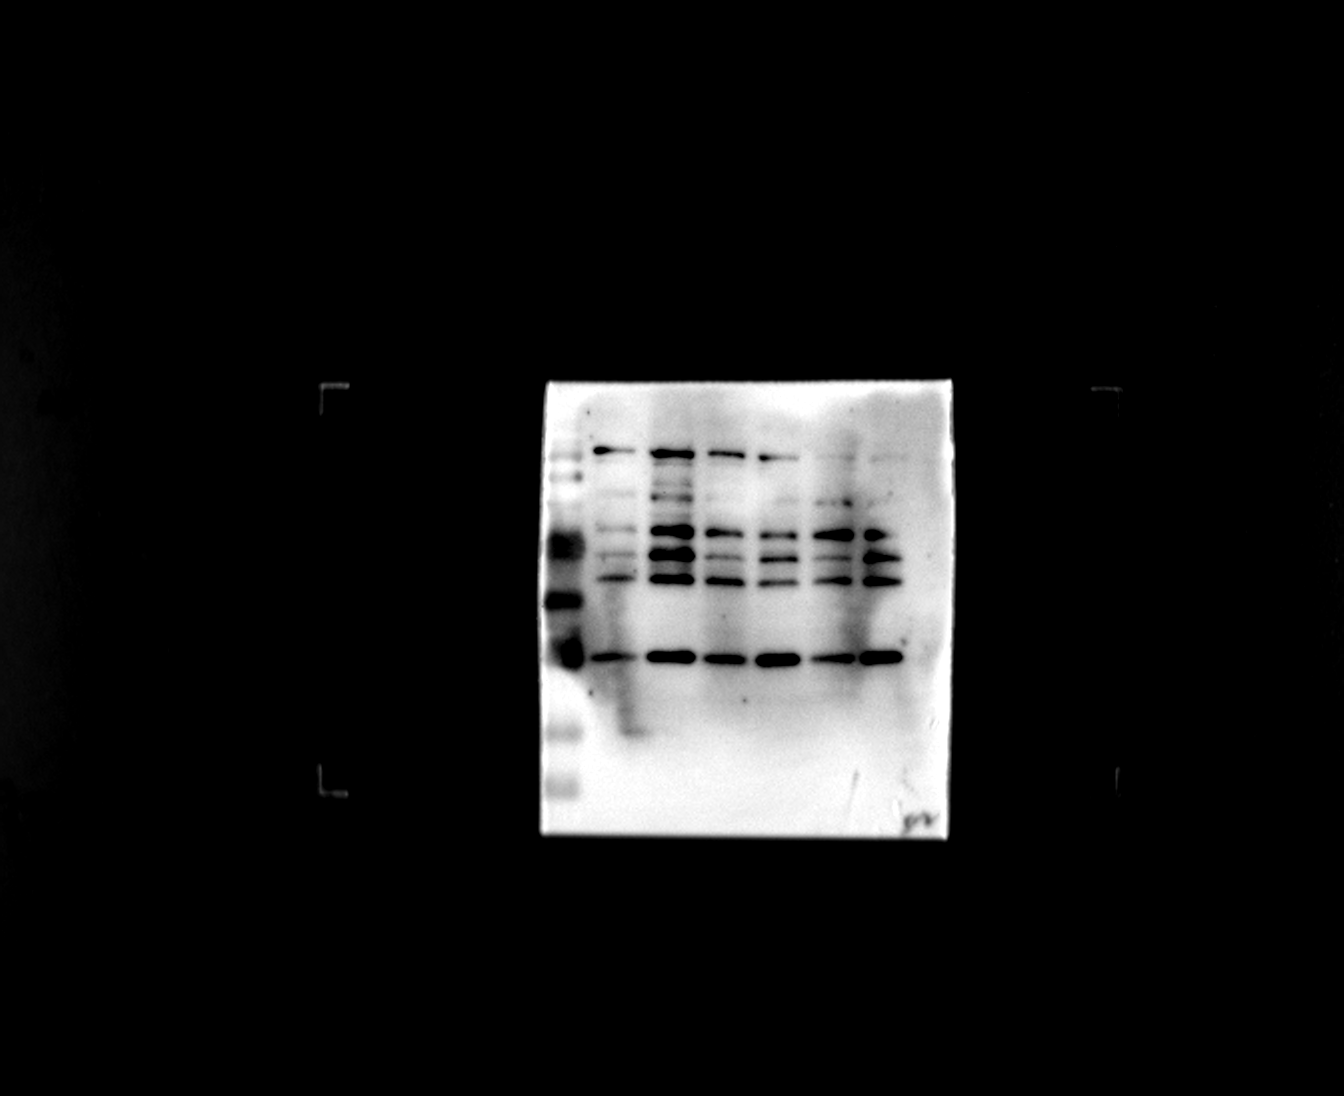


Control EAE Control EAE Control EAE

caspase-8

57kDa

ASC

23kDa

f

e


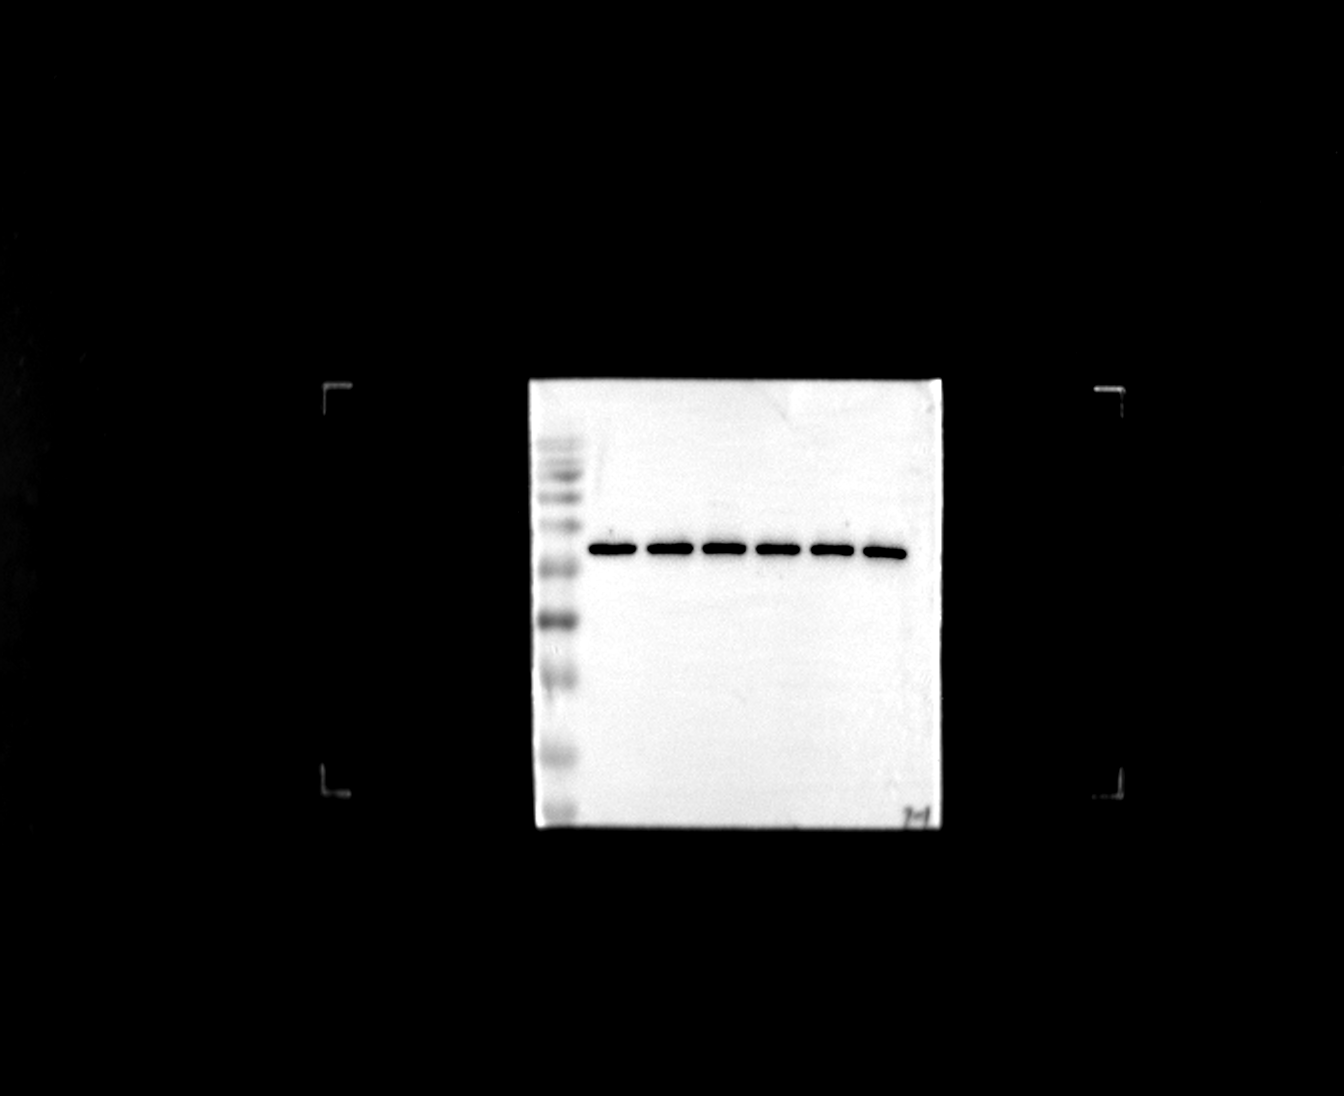

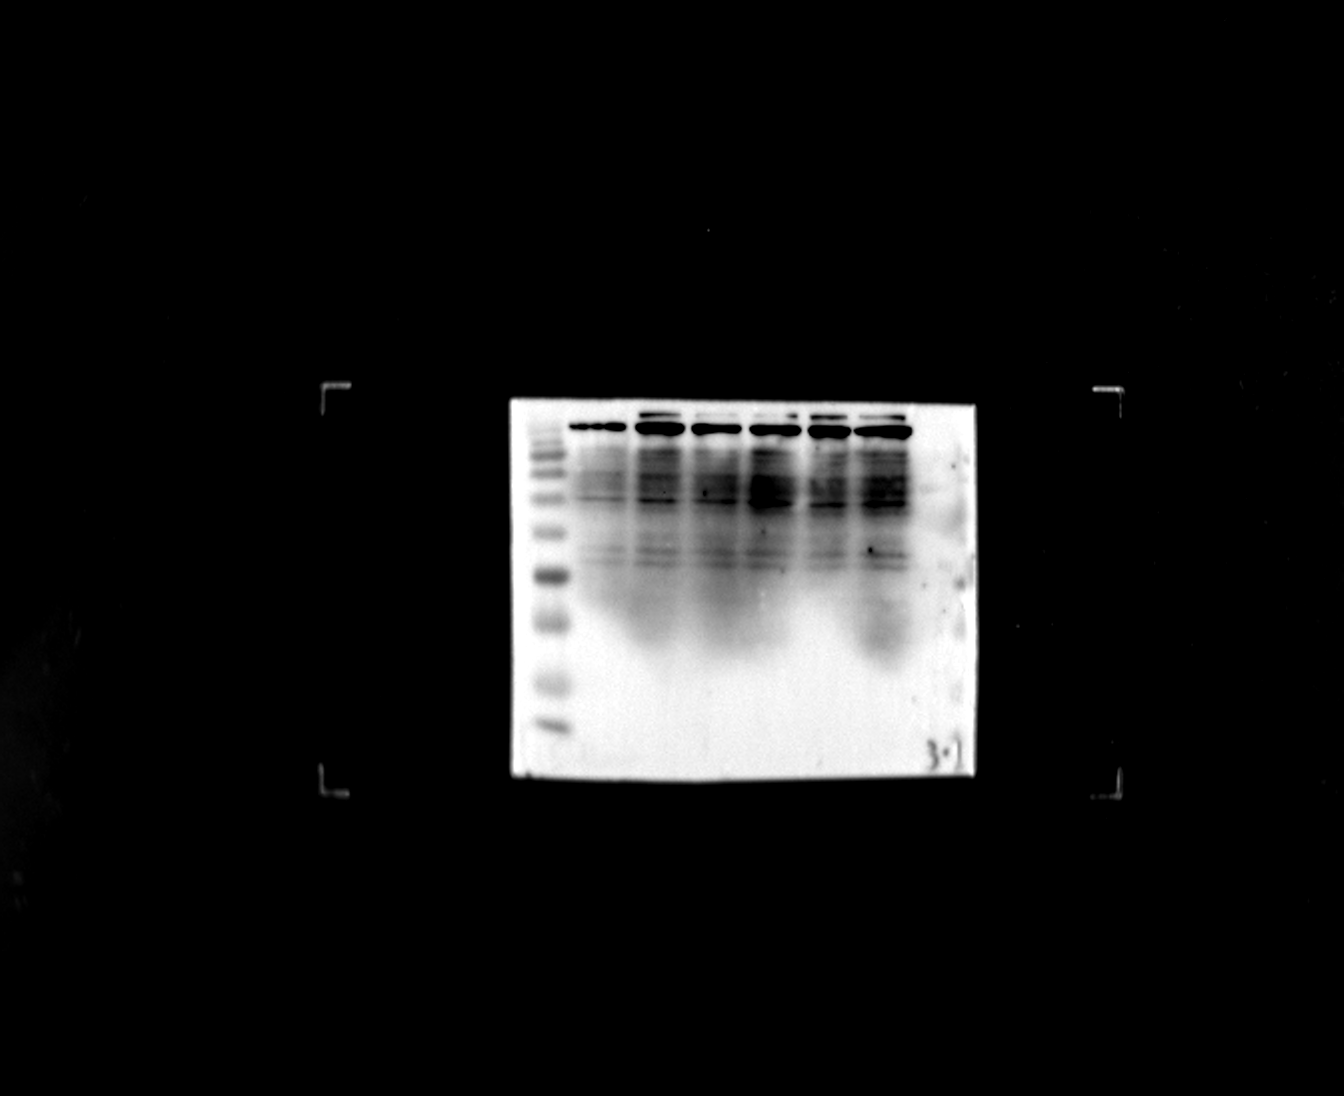


Control EAE Control EAE Control EAE

Control EAE Control EAE Control EAE

RIPK3

57kDa

β-actin

42kDa

**Figure S5: Original Western blot images (uncropped and unprocessed) . (a) NLRC5, (b) ZBP1, (c) caspase-8, (d) ASC, (e) RIPK3, (f) β-actin**
