# Supplementary material for: NLRC5-Mediated Epigenetic and Proteomic Regulation of Microglial Panoptosis Drives Neuroinflammation in Multiple Sclerosis
Source: Research Square preprint supplement (doi:10.21203/rs.3.rs-6759227/v1), 2025-06-26
Supplement: Supplementary file 4 [file 4e1c8c5f12fb89ee33c0794b.docx]

a

b


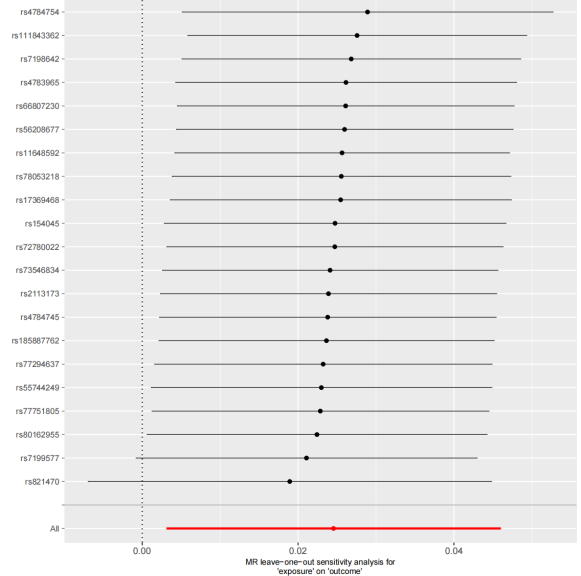

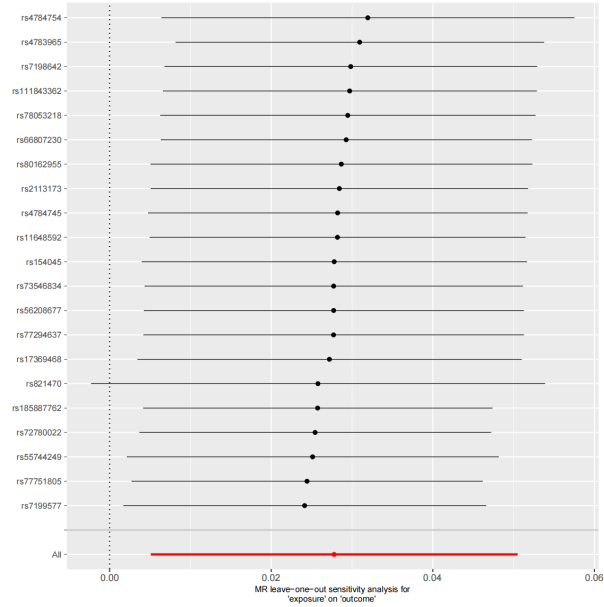


c

d


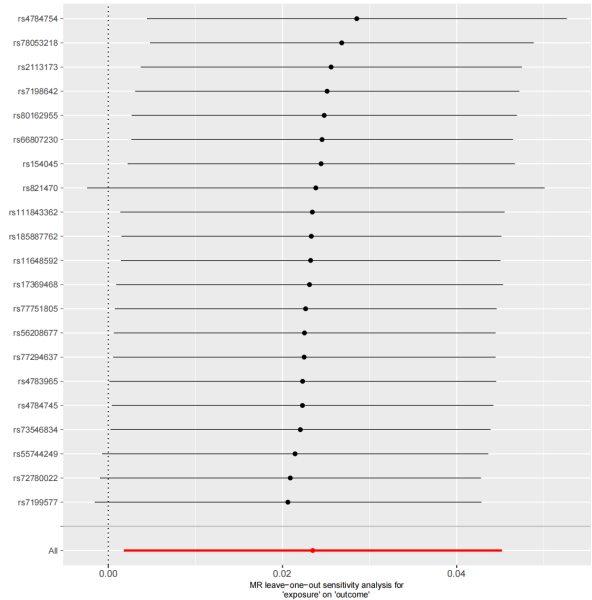

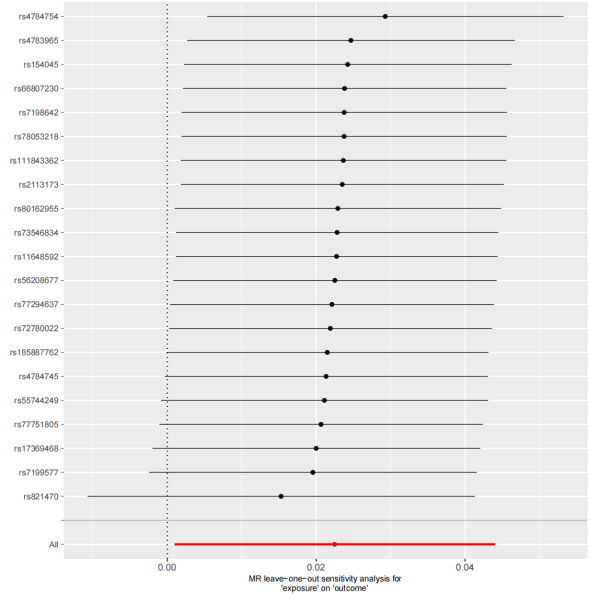


e

f


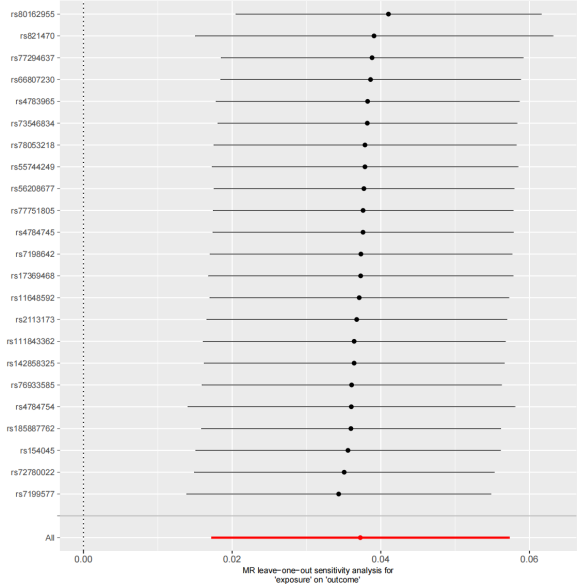

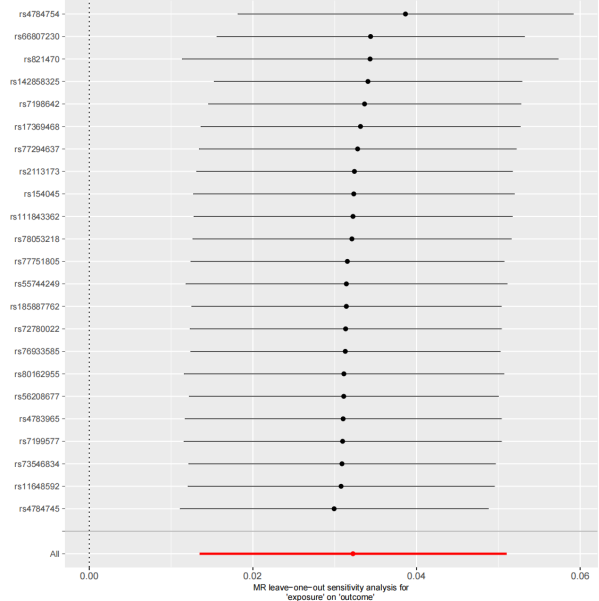


g

h


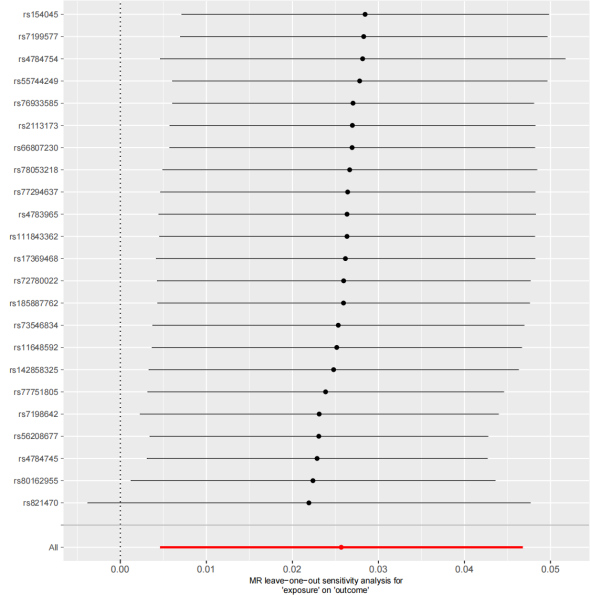

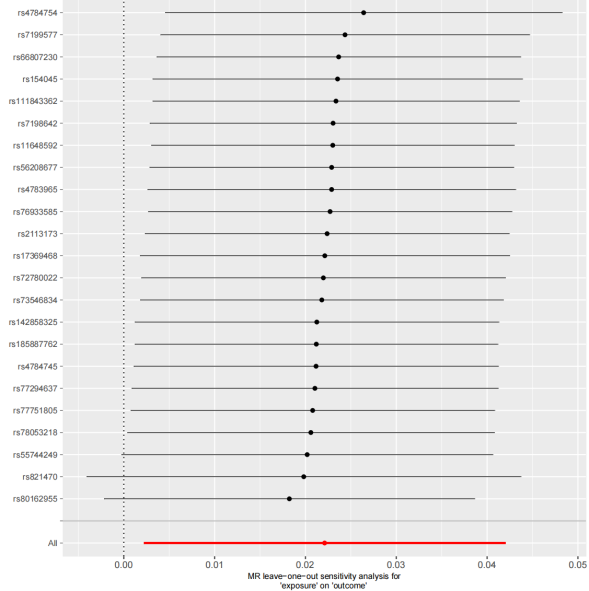


**Figure S3. Leave-one-out sensitivity analyses of NLRC5 eQTL effects on pQTLs across cohorts.**

(a–d) Leave-one-out analysis for the causal effects of NLRC5 eQTL on pQTLs of GABARAP, BRSK2, TNFSF12, and BCL2 in the deCODE Iceland cohort. Each panel displays the inverse-variance weighted (IVW) estimate (solid horizontal line) with 95% confidence intervals (shaded area) after iteratively excluding individual single nucleotide polymorphisms (SNPs). The vertical dashed line represents the null effect (β = 0).

(e–h) Corresponding leave-one-out analysis for NLRC5 eQTL effects on pQTLs of GABARAP, BRSK2, TNFSF12, and BCL2 in the UKB-PPP cohort.
