# Supplementary material for: NLRC5-Mediated Epigenetic and Proteomic Regulation of Microglial Panoptosis Drives Neuroinflammation in Multiple Sclerosis
Source: Research Square preprint supplement (doi:10.21203/rs.3.rs-6759227/v1), 2025-06-26
Supplement: Supplementary file 5 [file 52cc4f6b29fa76aa8b720eb2.xlsx]

## Sheet: Sheet1
id	nsnp	method	b	se	or	or_lci95	or_uci95	pvalue	FDR
BTN2A1	23	Inverse variance weighted	0.0529906	0.00964348	1.05442	1.03468	1.07454	3.90787e-08	1.56315e-05
KLRB1	23	Inverse variance weighted	0.0626214	0.0121382	1.06462	1.03959	1.09026	2.48228e-07	4.09841e-05
MANSC1	23	Inverse variance weighted	0.0518584	0.0101308	1.05323	1.03252	1.07435	3.0738e-07	4.09841e-05
ESM1	23	Inverse variance weighted	0.0483239	0.0103155	1.04951	1.0285	1.07095	2.80523e-06	0.000280523
ULBP2	23	Inverse variance weighted	0.0436103	0.00944551	1.04458	1.02541	1.06409	3.89249e-06	0.0003114
CHM	23	Inverse variance weighted	0.048077	0.010634	1.04925	1.02761	1.07135	6.15248e-06	0.000410165
KLRD1	23	Inverse variance weighted	0.0483972	0.010841	1.04959	1.02752	1.07213	8.03379e-06	0.000459074
ENO3	23	Inverse variance weighted	0.0420528	0.00969106	1.04295	1.02333	1.06295	1.42908e-05	0.000674695
LAP3	23	Inverse variance weighted	0.0445895	0.0103072	1.0456	1.02469	1.06694	1.51806e-05	0.000674695
CABP2	23	Inverse variance weighted	0.0440181	0.0103719	1.045	1.02397	1.06646	2.19586e-05	0.00081783
ARAF	23	Inverse variance weighted	0.0478695	0.0113131	1.04903	1.02603	1.07255	2.32304e-05	0.00081783
FGFBP3	23	Inverse variance weighted	0.0432583	0.0102923	1.04421	1.02335	1.06549	2.63439e-05	0.00081783
DCC	23	Inverse variance weighted	0.0426832	0.0101604	1.04361	1.02303	1.0646	2.65795e-05	0.00081783
IFNGR1	23	Inverse variance weighted	0.0407824	0.0099071	1.04163	1.02159	1.06205	3.84692e-05	0.00109912
YJU2	23	Inverse variance weighted	0.0416884	0.0102666	1.04257	1.0218	1.06376	4.89476e-05	0.00130527
IL17RA	23	Inverse variance weighted	0.0295055	0.00735552	1.02995	1.0152	1.0449	6.03742e-05	0.00150936
CANT1	23	Inverse variance weighted	0.0388992	0.0101528	1.03967	1.01918	1.06056	0.000127424	0.00297924
VCAN	23	Inverse variance weighted	0.0336461	0.0088105	1.03422	1.01651	1.05223	0.000134066	0.00297924
CDH6	23	Inverse variance weighted	0.0333746	0.00883442	1.03394	1.01619	1.052	0.000158223	0.00333101
DNAJC21	23	Inverse variance weighted	0.038018	0.0101245	1.03875	1.01834	1.05957	0.000173299	0.00346598
CRHBP	23	Inverse variance weighted	0.0361415	0.00966758	1.0368	1.01734	1.05664	0.000185178	0.00352721
DMD	23	Inverse variance weighted	0.0379568	0.0102128	1.03869	1.0181	1.05969	0.000201921	0.00367129
LTA	23	Inverse variance weighted	0.0384062	0.0104249	1.03915	1.01814	1.0606	0.000229514	0.00375022
FCGR3B	23	Inverse variance weighted	0.0320322	0.00869831	1.03255	1.0151	1.05031	0.000230882	0.00375022
KCNH2	23	Inverse variance weighted	0.0384822	0.0104607	1.03923	1.01814	1.06076	0.000234389	0.00375022
GABARAP	23	Inverse variance weighted	0.0372415	0.0102248	1.03794	1.01735	1.05895	0.000270223	0.00402459
IDO1	23	Inverse variance weighted	0.0386741	0.0106309	1.03943	1.018	1.06132	0.000274897	0.00402459
TPBGL	23	Inverse variance weighted	0.0380128	0.0104674	1.03874	1.01765	1.06028	0.000281721	0.00402459
KEL	23	Inverse variance weighted	0.0321443	0.00890269	1.03267	1.0148	1.05084	0.000305455	0.00421317
CALB2	23	Inverse variance weighted	0.0364428	0.0101911	1.03711	1.0166	1.05804	0.000348967	0.00465289
TRIM26	23	Inverse variance weighted	0.0370818	0.0105122	1.03778	1.01661	1.05938	0.000419489	0.00530051
CLASP1	23	Inverse variance weighted	0.0369824	0.0104925	1.03767	1.01655	1.05924	0.000424041	0.00530051
ACY3	23	Inverse variance weighted	0.0367906	0.0105189	1.03748	1.01631	1.05909	0.000469513	0.00560218
IDO1	23	Inverse variance weighted	0.0343442	0.00983002	1.03494	1.01519	1.05507	0.000476186	0.00560218
IGSF8	23	Inverse variance weighted	0.0352725	0.0101223	1.0359	1.01555	1.05666	0.00049278	0.00563177
COL28A1	23	Inverse variance weighted	0.0301767	0.00870311	1.03064	1.01321	1.04837	0.000525623	0.00577353
BTN3A2	23	Inverse variance weighted	0.0872705	0.0252003	1.09119	1.0386	1.14644	0.000534052	0.00577353
GABARAPL1	23	Inverse variance weighted	0.0374536	0.0109108	1.03816	1.0162	1.0606	0.000597588	0.0061394
LAYN	23	Inverse variance weighted	0.0321802	0.00937582	1.0327	1.0139	1.05186	0.000598591	0.0061394
IDO1	23	Inverse variance weighted	0.0337524	0.00989888	1.03433	1.01445	1.05459	0.000650295	0.00650295
ZPR1	23	Inverse variance weighted	0.0356749	0.0104933	1.03632	1.01522	1.05785	0.000674376	0.00656839
CLEC2L	23	Inverse variance weighted	0.0373952	0.0110376	1.0381	1.01589	1.06081	0.000704112	0.00656839
BMPER	23	Inverse variance weighted	0.0387193	0.0114311	1.03948	1.01645	1.06303	0.000706102	0.00656839
BRSK2	23	Inverse variance weighted	0.032232	0.00955788	1.03276	1.01359	1.05229	0.000745453	0.00674483
KCTD5	23	Inverse variance weighted	0.0341265	0.0101344	1.03472	1.01437	1.05547	0.000758794	0.00674483
ABO	23	Inverse variance weighted	-0.0221327	0.00659988	0.97811	0.965539	0.990845	0.000797981	0.00684731
CDC25A	23	Inverse variance weighted	-0.0352359	0.0105282	0.965378	0.945661	0.985505	0.000817441	0.00684731
F11	23	Inverse variance weighted	-0.0320007	0.00957044	0.968506	0.950508	0.986845	0.000826687	0.00684731
TREML2	23	Inverse variance weighted	0.0330167	0.00988624	1.03357	1.01373	1.05379	0.000838795	0.00684731
ICAM2	23	Inverse variance weighted	0.0252887	0.00758868	1.02561	1.01047	1.04098	0.000860921	0.00688737
CENPJ	23	Inverse variance weighted	0.0358418	0.0107993	1.03649	1.01478	1.05866	0.00090371	0.00708792
CD48	23	Inverse variance weighted	0.037292	0.0112831	1.038	1.01529	1.06121	0.000949366	0.00716938
GALNT2	23	Inverse variance weighted	0.0318452	0.00965172	1.03236	1.01301	1.05207	0.000968801	0.00716938
EIF2S2	23	Inverse variance weighted	0.0360706	0.010944	1.03673	1.01473	1.05921	0.000980934	0.00716938
ICAM4	23	Inverse variance weighted	-0.0292907	0.00891186	0.971134	0.954318	0.988246	0.00101364	0.00716938
LAMP2	23	Inverse variance weighted	0.0331704	0.0101118	1.03373	1.01344	1.05442	0.00103666	0.00716938
ANXA2	23	Inverse variance weighted	0.0313184	0.00955286	1.03181	1.01267	1.05132	0.00104385	0.00716938
IDO1	23	Inverse variance weighted	0.0320903	0.00979906	1.03261	1.01297	1.05263	0.00105723	0.00716938
MILR1	23	Inverse variance weighted	0.0311814	0.0095306	1.03167	1.01258	1.05113	0.00106899	0.00716938
CD300LF	23	Inverse variance weighted	0.0283414	0.00867151	1.02875	1.01141	1.04638	0.00108182	0.00716938
WFIKKN2	23	Inverse variance weighted	0.0298842	0.00915193	1.03034	1.01202	1.04898	0.00109333	0.00716938
MCEE	23	Inverse variance weighted	0.0334181	0.0103013	1.03398	1.01332	1.05507	0.00117836	0.00751297
TPP1	23	Inverse variance weighted	0.0323066	0.0099752	1.03283	1.01284	1.05323	0.00120079	0.00751297
BSG	23	Inverse variance weighted	0.035421	0.0109618	1.03606	1.01403	1.05856	0.00123223	0.00751297
ASAH1	23	Inverse variance weighted	0.0346496	0.0107237	1.03526	1.01372	1.05725	0.00123306	0.00751297
ANXA5	23	Inverse variance weighted	0.0336256	0.01042	1.0342	1.01329	1.05554	0.00125079	0.00751297
CD300A	23	Inverse variance weighted	0.0333408	0.0103373	1.0339	1.01317	1.05506	0.00125842	0.00751297
APOBR	23	Inverse variance weighted	-0.0392883	0.0122081	0.961473	0.93874	0.984757	0.00128992	0.00758777
FLRT2	23	Inverse variance weighted	0.0296973	0.00929027	1.03014	1.01155	1.04907	0.00139057	0.00801467
IGFBPL1	23	Inverse variance weighted	0.0285847	0.00894916	1.029	1.01111	1.04721	0.00140257	0.00801467
IL34	23	Inverse variance weighted	0.0332761	0.0104913	1.03384	1.01279	1.05531	0.00151515	0.00841924
ART3	23	Inverse variance weighted	0.0287511	0.00906486	1.02917	1.01104	1.04762	0.00151546	0.00841924
ATP1B3	23	Inverse variance weighted	0.0331988	0.0105086	1.03376	1.01268	1.05527	0.001582	0.00866847
KRT14	23	Inverse variance weighted	0.0336436	0.0106984	1.03422	1.01276	1.05613	0.00166236	0.00889365
HSDL2	23	Inverse variance weighted	0.0290492	0.00925047	1.02948	1.01098	1.04831	0.00168779	0.00889365
ZNF174	23	Inverse variance weighted	0.0328809	0.0104718	1.03343	1.01243	1.05486	0.00168979	0.00889365
KYNU	23	Inverse variance weighted	0.0334451	0.0106741	1.03401	1.0126	1.05587	0.00172857	0.0089796
DOC2B	23	Inverse variance weighted	0.0347276	0.0111005	1.03534	1.01306	1.05811	0.00175717	0.00901114
ING1	23	Inverse variance weighted	0.0324876	0.0103984	1.03302	1.01218	1.05429	0.00178246	0.00902509
CTSD	23	Inverse variance weighted	0.0303546	0.00974371	1.03082	1.01132	1.0507	0.00183758	0.00915058
IL12RB1	23	Inverse variance weighted	0.0303741	0.00975769	1.03084	1.01131	1.05074	0.00185299	0.00915058
CEP350	23	Inverse variance weighted	-0.0334589	0.0107919	0.967095	0.946853	0.987769	0.00193283	0.00942845
EPPK1	23	Inverse variance weighted	0.029165	0.00948574	1.02959	1.01063	1.04892	0.00210772	0.0100633
CLEC5A	23	Inverse variance weighted	0.0316318	0.0103014	1.03214	1.01151	1.05319	0.00213599	0.0100633
ENG	23	Inverse variance weighted	0.0290052	0.00945129	1.02943	1.01054	1.04868	0.00214843	0.0100633
CD7	23	Inverse variance weighted	0.0337513	0.011016	1.03433	1.01223	1.0569	0.00218503	0.0100633
FCRL1	23	Inverse variance weighted	0.0339288	0.0110757	1.03451	1.0123	1.05721	0.00218878	0.0100633
CST5	23	Inverse variance weighted	-0.02689	0.00882408	0.973468	0.956777	0.990451	0.00230877	0.0104944
APBB1IP	23	Inverse variance weighted	0.0304214	0.0100121	1.03089	1.01086	1.05132	0.00237781	0.0106868
MLN	23	Inverse variance weighted	0.0270685	0.00892099	1.02744	1.00963	1.04556	0.00241131	0.0107169
CINP	23	Inverse variance weighted	0.0310531	0.0103988	1.03154	1.01073	1.05278	0.00282434	0.0121367
IL4R	23	Inverse variance weighted	0.031365	0.0105205	1.03186	1.0108	1.05336	0.00287009	0.0121367
INSR	23	Inverse variance weighted	-0.0310602	0.0104246	0.969417	0.949811	0.989428	0.00288717	0.0121367
CRISP3	23	Inverse variance weighted	0.0258011	0.00866377	1.02614	1.00886	1.04371	0.00290096	0.0121367
MMP13	23	Inverse variance weighted	0.030686	0.0103072	1.03116	1.01054	1.05221	0.00290958	0.0121367
CEP290	23	Inverse variance weighted	0.032514	0.0109225	1.03305	1.01117	1.0554	0.0029128	0.0121367
LGALS1	23	Inverse variance weighted	0.0293088	0.00990063	1.02974	1.00995	1.04992	0.0030734	0.0126738
MARCO	23	Inverse variance weighted	0.0286595	0.00970081	1.02907	1.00969	1.04883	0.00313331	0.012789
ITPR1	23	Inverse variance weighted	0.0303494	0.0103086	1.03081	1.0102	1.05185	0.00323908	0.0130872
CASP4	23	Inverse variance weighted	-0.0313949	0.0108067	0.969093	0.948782	0.989838	0.00367085	0.0146663
B2M	23	Inverse variance weighted	0.0665006	0.0229124	1.06876	1.02183	1.11785	0.00370325	0.0146663
CHI3L1	23	Inverse variance weighted	0.0266088	0.00921089	1.02697	1.00859	1.04567	0.00386667	0.0151634
BTLA	23	Inverse variance weighted	0.0303442	0.0105183	1.03081	1.00978	1.05228	0.00391532	0.0152051
CLEC7A	23	Inverse variance weighted	0.0223245	0.00777235	1.02258	1.00712	1.03827	0.00407495	0.0156729
CSPG4	23	Inverse variance weighted	0.0305814	0.0106668	1.03105	1.00972	1.05284	0.00414422	0.0157875
C2orf69	23	Inverse variance weighted	0.0296698	0.0103776	1.03011	1.00937	1.05128	0.00424934	0.0160352
IL20RB	23	Inverse variance weighted	0.029766	0.010433	1.03021	1.00936	1.0515	0.00433003	0.016187
MCAM	23	Inverse variance weighted	0.0274158	0.00964119	1.0278	1.00856	1.0474	0.00446054	0.0163696
CRTAC1	23	Inverse variance weighted	-0.0225599	0.00793672	0.977693	0.962601	0.993021	0.00447658	0.0163696
TMPRSS11B	23	Inverse variance weighted	-0.0297831	0.0104845	0.970656	0.950913	0.990809	0.00450163	0.0163696
BAMBI	23	Inverse variance weighted	0.0289788	0.0102566	1.0294	1.00892	1.05031	0.00472265	0.0170186
CSF1	23	Inverse variance weighted	0.0281709	0.0100236	1.02857	1.00856	1.04898	0.00494704	0.017668
KRT8	23	Inverse variance weighted	0.02925	0.0104329	1.02968	1.00884	1.05095	0.00505296	0.0178683
CGN	23	Inverse variance weighted	0.0292736	0.0104596	1.02971	1.00881	1.05103	0.00513031	0.0178683
GBP1	23	Inverse variance weighted	0.0305172	0.0109288	1.03099	1.00914	1.05331	0.00523234	0.0178683
FCER2	23	Inverse variance weighted	0.0362911	0.0129993	1.03696	1.01087	1.06372	0.00524191	0.0178683
ATP5PO	23	Inverse variance weighted	-0.029283	0.0104937	0.971142	0.951372	0.991323	0.00526212	0.0178683
CKAP4	23	Inverse variance weighted	0.0277069	0.00993087	1.02809	1.00828	1.0483	0.00527116	0.0178683
BATF	23	Inverse variance weighted	0.029165	0.010486	1.02959	1.00865	1.05097	0.00541368	0.0181047
MATN2	23	Inverse variance weighted	0.0261031	0.00938871	1.02645	1.00773	1.04551	0.0054314	0.0181047
ERI1	23	Inverse variance weighted	0.0285027	0.0102797	1.02891	1.00839	1.04985	0.00555892	0.0183766
CHCHD10	23	Inverse variance weighted	0.0276678	0.00999875	1.02805	1.0081	1.0484	0.00565527	0.0185294
ADAM22	23	Inverse variance weighted	0.0252521	0.00913381	1.02557	1.00738	1.0441	0.00569778	0.0185294
MECR	23	Inverse variance weighted	0.0354973	0.0128605	1.03613	1.01034	1.06258	0.00577705	0.0186357
IL18BP	23	Inverse variance weighted	0.0268576	0.00975845	1.02722	1.00776	1.04706	0.00591891	0.0189405
FGF9	23	Inverse variance weighted	-0.0318388	0.0116034	0.968663	0.946881	0.990945	0.00607111	0.0192734
CASC3	23	Inverse variance weighted	0.0283297	0.0103407	1.02873	1.00809	1.0498	0.00615081	0.0192916
DDX53	23	Inverse variance weighted	0.0287146	0.0104877	1.02913	1.00819	1.0505	0.00618261	0.0192916
GADD45GIP1	23	Inverse variance weighted	0.0293646	0.0107332	1.0298	1.00836	1.05169	0.00622154	0.0192916
FGF7	23	Inverse variance weighted	-0.0290002	0.0106125	0.971416	0.951419	0.991834	0.00628254	0.0193309
ANP32C	23	Inverse variance weighted	0.0285745	0.0104769	1.02899	1.00807	1.05034	0.00638401	0.0193626
MDM1	23	Inverse variance weighted	0.0283195	0.0103845	1.02872	1.008	1.04988	0.00638966	0.0193626
FARSA	23	Inverse variance weighted	0.0352575	0.0129725	1.03589	1.00988	1.06256	0.0065706	0.019661
CPXM1	23	Inverse variance weighted	0.0280865	0.0103388	1.02848	1.00785	1.04954	0.00659542	0.019661
ADGRE1	23	Inverse variance weighted	0.0265843	0.00979307	1.02694	1.00742	1.04684	0.0066356	0.019661
ANXA10	23	Inverse variance weighted	0.0275691	0.0102094	1.02795	1.00759	1.04873	0.00692657	0.0203723
GATD3	23	Inverse variance weighted	0.0278214	0.0103627	1.02821	1.00754	1.04931	0.00725819	0.0211918
DCTPP1	23	Inverse variance weighted	0.0297216	0.0111258	1.03017	1.00795	1.05288	0.00755327	0.0218398
DPP10	23	Inverse variance weighted	0.0292601	0.0109673	1.02969	1.00779	1.05207	0.00763158	0.0218398
FCAR	23	Inverse variance weighted	0.022426	0.00840763	1.02268	1.00596	1.03967	0.00764546	0.0218398
ACOT13	23	Inverse variance weighted	0.0275145	0.0103243	1.0279	1.00731	1.04891	0.00769852	0.0218398
IL1R1	23	Inverse variance weighted	0.0259982	0.00980335	1.02634	1.00681	1.04625	0.00800247	0.0225422
DNM1	23	Inverse variance weighted	0.0265521	0.0100471	1.02691	1.00688	1.04733	0.00822302	0.0229137
FUT8	23	Inverse variance weighted	0.0246007	0.00931242	1.02491	1.00637	1.04378	0.00824892	0.0229137
LACRT	23	Inverse variance weighted	-0.0319044	0.0121101	0.968599	0.945879	0.991865	0.0084252	0.0232419
CCL11	23	Inverse variance weighted	-0.0250181	0.00951031	0.975292	0.957281	0.993642	0.00852276	0.02335
CTSB	23	Inverse variance weighted	0.0244737	0.00934611	1.02478	1.00617	1.04372	0.00882929	0.0238671
CD28	23	Inverse variance weighted	0.0299411	0.0114501	1.03039	1.00753	1.05378	0.00892483	0.0238671
VTCN1	23	Inverse variance weighted	0.0321315	0.0122938	1.03265	1.00807	1.05784	0.00895879	0.0238671
ARHGAP30	23	Inverse variance weighted	0.0271506	0.0103932	1.02752	1.0068	1.04867	0.00899261	0.0238671
CR2	23	Inverse variance weighted	0.0343475	0.0131515	1.03494	1.00861	1.06197	0.00900985	0.0238671
COL9A2	23	Inverse variance weighted	0.0271317	0.0104154	1.0275	1.00674	1.04869	0.00918819	0.0240694
CD209	23	Inverse variance weighted	-0.0237028	0.00910156	0.976576	0.959309	0.994153	0.00920744	0.0240694
ADD1	23	Inverse variance weighted	0.0292591	0.0112446	1.02969	1.00725	1.05264	0.00926673	0.0240694
ARL2BP	23	Inverse variance weighted	-0.0498124	0.0191831	0.951408	0.9163	0.987861	0.0094128	0.0242911
IMMT	23	Inverse variance weighted	0.0258513	0.00997741	1.02619	1.00632	1.04645	0.00957012	0.0245388
C1QBP	23	Inverse variance weighted	0.0305651	0.0118274	1.03104	1.00741	1.05522	0.00975879	0.0248632
ALDH3A1	23	Inverse variance weighted	0.0239494	0.00931101	1.02424	1.00572	1.0431	0.0101066	0.0252867
FST	23	Inverse variance weighted	0.0256523	0.00998374	1.02598	1.0061	1.04626	0.0101874	0.0252867
CD55	23	Inverse variance weighted	0.0251615	0.00979492	1.02548	1.00598	1.04536	0.0102041	0.0252867
ANGPTL2	23	Inverse variance weighted	0.02786	0.0108558	1.02825	1.0066	1.05036	0.0102771	0.0252867
LRP2	23	Inverse variance weighted	0.0286814	0.0111805	1.0291	1.00679	1.0519	0.0103088	0.0252867
BST1	23	Inverse variance weighted	0.0165301	0.00644915	1.01667	1.0039	1.0296	0.0103727	0.0252867
CEACAM3	23	Inverse variance weighted	-0.0268917	0.0105021	0.973467	0.953634	0.993712	0.0104487	0.0252867
TNFSF13	23	Inverse variance weighted	0.0240164	0.00938581	1.02431	1.00564	1.04332	0.0105033	0.0252867
TMPRSS5	23	Inverse variance weighted	0.0211329	0.0082637	1.02136	1.00495	1.03804	0.0105481	0.0252867
APOH	23	Inverse variance weighted	-0.0236548	0.00926089	0.976623	0.959056	0.994512	0.0106412	0.0252867
VSIR	23	Inverse variance weighted	0.02546	0.00997667	1.02579	1.00592	1.04604	0.0107122	0.0252867
ENPP2	23	Inverse variance weighted	0.0203122	0.00796251	1.02052	1.00472	1.03657	0.0107419	0.0252867
MMP9	23	Inverse variance weighted	-0.0258285	0.0101255	0.974502	0.955353	0.994035	0.0107469	0.0252867
CD80	23	Inverse variance weighted	0.0260118	0.0102118	1.02635	1.00601	1.0471	0.010858	0.0253989
DTNB	23	Inverse variance weighted	0.0255842	0.0100825	1.02591	1.00584	1.04639	0.0111648	0.0259647
ITGB6	23	Inverse variance weighted	0.0241689	0.00954046	1.02446	1.00548	1.0438	0.0112993	0.0260684
IL6	23	Inverse variance weighted	-0.0250626	0.00991752	0.975249	0.956475	0.994391	0.0115007	0.0260684
MAG	23	Inverse variance weighted	0.0265077	0.0104902	1.02686	1.00596	1.04819	0.0115076	0.0260684
CLSTN1	23	Inverse variance weighted	0.0301262	0.0119276	1.03058	1.00677	1.05496	0.0115447	0.0260684
CDH22	23	Inverse variance weighted	0.0263357	0.0104317	1.02669	1.00591	1.04789	0.0115836	0.0260684
CR1	23	Inverse variance weighted	0.0272132	0.0107815	1.02759	1.0061	1.04953	0.0116004	0.0260684
TNFRSF14	23	Inverse variance weighted	0.025285	0.0100309	1.02561	1.00564	1.04597	0.0117119	0.0261718
DKK3	23	Inverse variance weighted	0.0233742	0.00928649	1.02365	1.00519	1.04245	0.0118355	0.0263012
TSLP	23	Inverse variance weighted	0.0267492	0.0106984	1.02711	1.0058	1.04887	0.0124093	0.0274239
ARHGEF5	23	Inverse variance weighted	-0.028827	0.0115485	0.971584	0.94984	0.993827	0.012554	0.0275912
AKR7L	23	Inverse variance weighted	0.0326238	0.0130826	1.03316	1.00701	1.06	0.0126424	0.0276338
FUOM	23	Inverse variance weighted	0.0303056	0.0121701	1.03077	1.00647	1.05565	0.0127681	0.0276524
ECHS1	23	Inverse variance weighted	0.0283527	0.0113886	1.02876	1.00605	1.05198	0.0127897	0.0276524
ENAH	23	Inverse variance weighted	0.0263609	0.0105966	1.02671	1.00561	1.04826	0.0128584	0.0276524
BCAN	23	Inverse variance weighted	0.0243979	0.00981774	1.0247	1.00517	1.04461	0.0129522	0.0277053
COL15A1	23	Inverse variance weighted	0.0254212	0.010249	1.02575	1.00535	1.04656	0.0131249	0.0277061
KIR3DL2	23	Inverse variance weighted	0.0268003	0.0108054	1.02716	1.00564	1.04915	0.0131283	0.0277061
FNTA	23	Inverse variance weighted	0.0253031	0.0102088	1.02563	1.00531	1.04635	0.0131911	0.0277061
ADGRG1	23	Inverse variance weighted	0.0308339	0.0124455	1.03131	1.00646	1.05678	0.0132297	0.0277061
CXCL1	23	Inverse variance weighted	-0.0245584	0.00993131	0.975741	0.956931	0.99492	0.0134049	0.027814
DCUN1D2	23	Inverse variance weighted	-0.0259937	0.0105135	0.974341	0.954469	0.994627	0.0134202	0.027814
MED21	23	Inverse variance weighted	0.0261157	0.0105999	1.02646	1.00535	1.04801	0.013749	0.0283484
IL1RL1	23	Inverse variance weighted	0.0185211	0.00754002	1.01869	1.00375	1.03386	0.0140347	0.0287104
ITGB7	23	Inverse variance weighted	0.0232172	0.00946184	1.02349	1.00468	1.04265	0.0141365	0.0287104
XCL1	23	Inverse variance weighted	0.0240317	0.0097958	1.02432	1.00484	1.04418	0.0141567	0.0287104
GCNT1	23	Inverse variance weighted	0.0266285	0.0108648	1.02699	1.00535	1.04909	0.0142498	0.0287104
BACH1	23	Inverse variance weighted	0.0245787	0.0100387	1.02488	1.00492	1.04525	0.0143488	0.0287104
LTBP2	23	Inverse variance weighted	0.0207571	0.00847834	1.02097	1.00415	1.03808	0.0143552	0.0287104
CD33	23	Inverse variance weighted	0.0123733	0.00506716	1.01245	1.00244	1.02256	0.0146119	0.0290785
CD4	23	Inverse variance weighted	0.0284566	0.0116665	1.02887	1.00561	1.05266	0.0147209	0.0291502
ARNT	23	Inverse variance weighted	0.0270739	0.0111178	1.02744	1.0053	1.05008	0.0148842	0.0293285
BECN1	23	Inverse variance weighted	0.0287178	0.0118262	1.02913	1.00555	1.05327	0.0151691	0.0297432
CD83	23	Inverse variance weighted	0.0243931	0.0100659	1.02469	1.00467	1.04511	0.0153782	0.0300063
FCRL2	23	Inverse variance weighted	0.0226844	0.00938026	1.02294	1.00431	1.04192	0.0155925	0.0300341
ATRAID	23	Inverse variance weighted	0.0274398	0.0113504	1.02782	1.00521	1.05094	0.0156271	0.0300341
TNNI3	23	Inverse variance weighted	0.0289083	0.0119718	1.02933	1.00546	1.05377	0.015748	0.0300341
CD72	23	Inverse variance weighted	0.0299119	0.012389	1.03036	1.00565	1.05569	0.0157617	0.0300341
IL5RA	23	Inverse variance weighted	-0.0237645	0.00984344	0.976516	0.957856	0.995539	0.0157679	0.0300341
TPSAB1	23	Inverse variance weighted	0.0245612	0.0102151	1.02487	1.00455	1.04559	0.0161994	0.0305636
ERP44	23	Inverse variance weighted	0.0236592	0.0098534	1.02394	1.00436	1.04391	0.0163448	0.0305636
FLT3	23	Inverse variance weighted	0.0247081	0.010291	1.02502	1.00455	1.0459	0.0163525	0.0305636
CCDC28A	23	Inverse variance weighted	0.0251664	0.0104832	1.02549	1.00463	1.04677	0.0163666	0.0305636
CWC15	23	Inverse variance weighted	0.0243898	0.0101655	1.02469	1.00448	1.04531	0.0164279	0.0305636
CTSL	23	Inverse variance weighted	0.0235285	0.00982008	1.02381	1.00429	1.0437	0.0165769	0.0306951
C1QTNF9	23	Inverse variance weighted	0.0184353	0.0077086	1.01861	1.00333	1.03411	0.0167786	0.0306951
TSHB	23	Inverse variance weighted	-0.0243371	0.0101804	0.975957	0.956676	0.995626	0.0168219	0.0306951
TNFSF12	23	Inverse variance weighted	0.0256766	0.0107442	1.02601	1.00463	1.04784	0.0168575	0.0306951
LY9	23	Inverse variance weighted	0.0271384	0.0113585	1.02751	1.00489	1.05064	0.0168823	0.0306951
TMEM132A	23	Inverse variance weighted	-0.0222622	0.00933484	0.977984	0.960253	0.996042	0.017086	0.030925
LARP1	23	Inverse variance weighted	0.0241462	0.0101491	1.02444	1.00426	1.04502	0.0173528	0.0312664
CD300C	23	Inverse variance weighted	0.0220757	0.00929879	1.02232	1.00386	1.04112	0.0175946	0.0315599
CAMLG	23	Inverse variance weighted	0.0267402	0.0112879	1.0271	1.00463	1.05008	0.0178393	0.0318559
KLK1	23	Inverse variance weighted	-0.0178063	0.00752569	0.982351	0.967968	0.996949	0.017978	0.0319609
ESPL1	23	Inverse variance weighted	-0.0250018	0.0105861	0.975308	0.95528	0.995756	0.0181881	0.0320529
C2	23	Inverse variance weighted	-0.0235485	0.00997088	0.976727	0.957824	0.996002	0.01819	0.0320529
CSF2RA	23	Inverse variance weighted	0.0244377	0.0103711	1.02474	1.00412	1.04578	0.0184572	0.032381
FCRL6	23	Inverse variance weighted	0.0220671	0.00939363	1.02231	1.00366	1.04131	0.018816	0.0325591
FSTL3	23	Inverse variance weighted	0.0229847	0.00979288	1.02325	1.0038	1.04308	0.0189211	0.0325591
FSTL1	23	Inverse variance weighted	0.028849	0.0122918	1.02927	1.00477	1.05437	0.0189252	0.0325591
KLK4	23	Inverse variance weighted	-0.0217716	0.00927656	0.978464	0.960834	0.996417	0.0189278	0.0325591
CSF3R	23	Inverse variance weighted	0.0251273	0.0107207	1.02545	1.00412	1.04722	0.0190872	0.0325591
ILKAP	23	Inverse variance weighted	0.0242886	0.010367	1.02459	1.00398	1.04562	0.0191356	0.0325591
AK2	23	Inverse variance weighted	0.025133	0.0107278	1.02545	1.00411	1.04724	0.0191404	0.0325591
TSPAN15	23	Inverse variance weighted	0.0245308	0.0104804	1.02483	1.004	1.0461	0.0192509	0.0325591
HSP90B1	23	Inverse variance weighted	0.0246262	0.0105247	1.02493	1.00401	1.04629	0.0192912	0.0325591
LEPR	23	Inverse variance weighted	0.0232053	0.00992598	1.02348	1.00376	1.04358	0.0193957	0.0325978
LONP1	23	Inverse variance weighted	0.0293409	0.0125767	1.02978	1.0047	1.05548	0.0196506	0.0327747
CTSH	23	Inverse variance weighted	0.0151042	0.00647503	1.01522	1.00242	1.02819	0.0196648	0.0327747
ADGRE2	23	Inverse variance weighted	0.0222165	0.00954662	1.02247	1.00351	1.04178	0.019957	0.0331236
JAM3	23	Inverse variance weighted	0.0235137	0.0101643	1.02379	1.0036	1.04439	0.020703	0.0342198
FCN1	23	Inverse variance weighted	0.0218121	0.00944019	1.02205	1.00331	1.04114	0.0208573	0.0342246
CREG1	23	Inverse variance weighted	0.0223115	0.00965967	1.02256	1.00338	1.04211	0.0209014	0.0342246
CHEK2	23	Inverse variance weighted	0.0241642	0.0104748	1.02446	1.00364	1.04571	0.0210616	0.0342246
TP53I3	23	Inverse variance weighted	0.0226531	0.00982817	1.02291	1.0034	1.04281	0.0211712	0.0342246
ECE1	23	Inverse variance weighted	0.0265174	0.0115072	1.02687	1.00397	1.0503	0.0211987	0.0342246
ACTN4	23	Inverse variance weighted	0.0240215	0.0104257	1.02431	1.00359	1.04546	0.0212193	0.0342246
VEGFB	23	Inverse variance weighted	0.0285679	0.0124216	1.02898	1.00423	1.05434	0.0214562	0.0344678
C1QL2	23	Inverse variance weighted	0.0220461	0.00959931	1.02229	1.00324	1.04171	0.0216399	0.0346238
C1QTNF1	23	Inverse variance weighted	0.022987	0.0100351	1.02325	1.00332	1.04358	0.0219836	0.0350336
LETM1	23	Inverse variance weighted	0.0233992	0.0102327	1.02368	1.00335	1.04441	0.0222133	0.0351905
CA5A	23	Inverse variance weighted	0.027263	0.0119264	1.02764	1.00389	1.05194	0.022258	0.0351905
ESAM	23	Inverse variance weighted	0.0226437	0.00995032	1.0229	1.00315	1.04305	0.0228654	0.0360085
IFI30	23	Inverse variance weighted	0.0214617	0.00944171	1.02169	1.00296	1.04078	0.023022	0.0361129
KDR	23	Inverse variance weighted	-0.0224656	0.00990248	0.977785	0.95899	0.996948	0.0232873	0.0361273
INSL5	23	Inverse variance weighted	-0.022723	0.0100176	0.977533	0.958527	0.996916	0.0233106	0.0361273
CTSZ	23	Inverse variance weighted	0.0218387	0.0096285	1.02208	1.00297	1.04155	0.0233213	0.0361273
APOM	23	Inverse variance weighted	-0.0541876	0.0239032	0.947254	0.903899	0.992689	0.0233924	0.0361273
KLHL41	23	Inverse variance weighted	0.0226899	0.0100443	1.02295	1.00301	1.04329	0.0238841	0.0366802
GDNF	23	Inverse variance weighted	0.0223138	0.00988126	1.02256	1.00295	1.04256	0.0239339	0.0366802
CLEC4M	23	Inverse variance weighted	-0.023006	0.0101974	0.977257	0.957918	0.996986	0.0240671	0.0367437
CRYM	23	Inverse variance weighted	0.0236175	0.0104786	1.0239	1.00308	1.04514	0.0242044	0.0367673
EIF5	23	Inverse variance weighted	0.023589	0.010473	1.02387	1.00307	1.0451	0.024299	0.0367673
GAS2	23	Inverse variance weighted	0.0243175	0.0108054	1.02462	1.00314	1.04655	0.0244174	0.0367673
CD2AP	23	Inverse variance weighted	0.0218784	0.00972382	1.02212	1.00282	1.04179	0.0244502	0.0367673
MFAP3L	23	Inverse variance weighted	0.0235344	0.010471	1.02381	1.00302	1.04504	0.0246025	0.0368577
MB	23	Inverse variance weighted	0.0243621	0.0108486	1.02466	1.0031	1.04668	0.024727	0.0369059
DPEP1	23	Inverse variance weighted	0.0227672	0.0101478	1.02303	1.00288	1.04358	0.0248611	0.0369681
FCN2	23	Inverse variance weighted	-0.0215934	0.00966837	0.978638	0.960267	0.99736	0.0255222	0.0378106
TTF2	23	Inverse variance weighted	0.0224742	0.0100838	1.02273	1.00271	1.04314	0.0258307	0.0379943
GFRA3	23	Inverse variance weighted	0.0228165	0.0102378	1.02308	1.00275	1.04382	0.0258361	0.0379943
VCAM1	23	Inverse variance weighted	0.0221612	0.00995029	1.02241	1.00266	1.04254	0.0259343	0.0379989
ARSB	23	Inverse variance weighted	0.022079	0.00991994	1.02232	1.00264	1.0424	0.0260329	0.0380043
DLK1	23	Inverse variance weighted	0.022034	0.00992332	1.02228	1.00259	1.04236	0.02639	0.0383855
CPA4	23	Inverse variance weighted	0.0206323	0.00930441	1.02085	1.0024	1.03963	0.0265903	0.0385229
AP2B1	23	Inverse variance weighted	0.0244175	0.0110177	1.02472	1.00283	1.04709	0.0266771	0.0385229
IGF2R	23	Inverse variance weighted	0.0207466	0.00939238	1.02096	1.00234	1.03993	0.0271832	0.038984
EREG	23	Inverse variance weighted	0.0234348	0.01061	1.02371	1.00264	1.04522	0.0271914	0.038984
BHLHE40	23	Inverse variance weighted	-0.0230332	0.0104789	0.97723	0.957364	0.997509	0.0279455	0.0399221
DPT	23	Inverse variance weighted	0.0194827	0.00888167	1.01967	1.00208	1.03758	0.0282657	0.0401315
BCAM	23	Inverse variance weighted	0.0211091	0.00962477	1.02133	1.00225	1.04078	0.0282927	0.0401315
TRIM24	23	Inverse variance weighted	0.0233246	0.0106493	1.0236	1.00245	1.04519	0.0285069	0.0402924
ACADM	23	Inverse variance weighted	0.0226128	0.010351	1.02287	1.00233	1.04383	0.0289175	0.0407289
CD38	23	Inverse variance weighted	0.0215737	0.0098827	1.02181	1.00221	1.04179	0.0290372	0.040754
ZP4	23	Inverse variance weighted	-0.0228359	0.0104845	0.977423	0.957542	0.997716	0.0294009	0.0410075
BCL2	23	Inverse variance weighted	0.022108	0.0101516	1.02235	1.00221	1.0429	0.0294229	0.0410075
LAMP3	23	Inverse variance weighted	0.0208118	0.00956256	1.02103	1.00207	1.04035	0.0295266	0.0410092
BPIFA2	23	Inverse variance weighted	-0.0409585	0.0188537	0.959869	0.925046	0.996003	0.0298226	0.041277
CRHR1	23	Inverse variance weighted	0.0227548	0.0104892	1.02302	1.0022	1.04427	0.0300553	0.0413061
ACRV1	23	Inverse variance weighted	0.0159501	0.00735377	1.01608	1.00154	1.03083	0.0300847	0.0413061
DPP7	23	Inverse variance weighted	0.0224611	0.01036	1.02272	1.00216	1.04369	0.0301535	0.0413061
CLEC6A	23	Inverse variance weighted	0.0204546	0.00945594	1.02067	1.00192	1.03976	0.0305299	0.0416791
TNFAIP8L2	23	Inverse variance weighted	0.0221994	0.0102719	1.02245	1.00207	1.04324	0.0306811	0.041743
TNC	23	Inverse variance weighted	0.0203436	0.00944036	1.02055	1.00184	1.03961	0.0311651	0.0421015
AOC1	23	Inverse variance weighted	-0.0220999	0.010261	0.978142	0.958667	0.998014	0.0312576	0.0421015
CDA	23	Inverse variance weighted	-0.0199841	0.00927877	0.980214	0.962549	0.998204	0.0312604	0.0421015
IL15RA	23	Inverse variance weighted	0.0212883	0.00989072	1.02152	1.0019	1.04151	0.0313695	0.0421067
JAM2	23	Inverse variance weighted	0.0242377	0.0112769	1.02453	1.00214	1.04743	0.0316093	0.0422867
MBL2	23	Inverse variance weighted	-0.0144137	0.00671778	0.98569	0.972796	0.998754	0.0319042	0.0424849
IFT20	23	Inverse variance weighted	0.0222897	0.0103925	1.02254	1.00192	1.04358	0.0319699	0.0424849
UXS1	23	Inverse variance weighted	0.021867	0.0102088	1.02211	1.00186	1.04277	0.0321946	0.0425825
COPE	23	Inverse variance weighted	0.0264147	0.0123363	1.02677	1.00224	1.0519	0.0322562	0.0425825
MINDY1	23	Inverse variance weighted	0.0215314	0.0100729	1.02176	1.00179	1.04214	0.0325538	0.0426777
CD300E	23	Inverse variance weighted	0.0199299	0.00932865	1.02013	1.00165	1.03895	0.0326454	0.0426777
VIPR1	23	Inverse variance weighted	0.0256854	0.0120228	1.02602	1.00212	1.05048	0.0326485	0.0426777
CPB2	23	Inverse variance weighted	-0.019839	0.00929962	0.980357	0.962649	0.99839	0.0328995	0.0428658
GALNT7	23	Inverse variance weighted	0.0239114	0.0112407	1.0242	1.00188	1.04701	0.0334026	0.04338
CHP1	23	Inverse variance weighted	0.022281	0.0104963	1.02253	1.00171	1.04379	0.0337742	0.0436175
LRPAP1	23	Inverse variance weighted	0.0181582	0.00855546	1.01832	1.00139	1.03554	0.0338036	0.0436175
FTCD	23	Inverse variance weighted	0.0239874	0.0113166	1.02428	1.00181	1.04725	0.0340344	0.0437741
GALNT10	23	Inverse variance weighted	0.0203802	0.00966529	1.02059	1.00144	1.04011	0.0349794	0.0447195
ATXN10	23	Inverse variance weighted	0.0220986	0.010481	1.02234	1.00156	1.04356	0.034993	0.0447195
TYRP1	23	Inverse variance weighted	-0.0218879	0.0104147	0.97835	0.958581	0.998526	0.0355856	0.045332
ADA2	23	Inverse variance weighted	0.0203629	0.00972435	1.02057	1.0013	1.04021	0.0362591	0.0460433
LILRB4	23	Inverse variance weighted	0.0187864	0.00898344	1.01896	1.00118	1.03706	0.0365079	0.0462125
TSPAN1	23	Inverse variance weighted	0.0197148	0.00945953	1.01991	1.00117	1.039	0.0371491	0.0468759
CSF1R	23	Inverse variance weighted	0.0226228	0.0108789	1.02288	1.0013	1.04493	0.0375693	0.047257
IFIT3	23	Inverse variance weighted	0.0213983	0.0102968	1.02163	1.00122	1.04246	0.037695	0.0472664
CGREF1	23	Inverse variance weighted	0.0188928	0.00909828	1.01907	1.00106	1.03741	0.0378452	0.0473065
IFNL2	23	Inverse variance weighted	0.0243197	0.0117267	1.02462	1.00134	1.04844	0.0380901	0.0474643
LILRA5	23	Inverse variance weighted	0.022222	0.010738	1.02247	1.00118	1.04422	0.0385014	0.0478141
CLEC4D	23	Inverse variance weighted	0.0191852	0.00927574	1.01937	1.00101	1.03807	0.0386099	0.0478141
CEACAM19	23	Inverse variance weighted	0.0223613	0.0108205	1.02261	1.00115	1.04453	0.0387742	0.0478694
ADH1B	23	Inverse variance weighted	0.0255488	0.0123747	1.02588	1.0013	1.05106	0.0389606	0.0478772
C1GALT1C1	23	Inverse variance weighted	0.0216445	0.0104931	1.02188	1.00108	1.04311	0.0391371	0.0478772
COLEC12	23	Inverse variance weighted	0.0191507	0.00928424	1.01934	1.00095	1.03805	0.0391396	0.0478772
AKR1B1	23	Inverse variance weighted	0.0221365	0.0107858	1.02238	1.001	1.04423	0.040133	0.0488871
VWF	23	Inverse variance weighted	0.0203583	0.0099232	1.02057	1.00091	1.04061	0.0402097	0.0488871
GASK1A	23	Inverse variance weighted	0.0237371	0.0115884	1.02402	1.00102	1.04755	0.0405253	0.0491215
ZBTB17	23	Inverse variance weighted	0.0208473	0.0101887	1.02107	1.00088	1.04166	0.0407443	0.0492379
ELN	23	Inverse variance weighted	-0.0155393	0.00760001	0.984581	0.970023	0.999357	0.0408907	0.0492658
GBA	23	Inverse variance weighted	0.0212556	0.0104259	1.02148	1.00082	1.04257	0.0414763	0.0498213
TMEM106A	23	Inverse variance weighted	0.0237516	0.0116647	1.02404	1.00089	1.04772	0.041731	0.0499773
