# Supplementary material for: NLRC5-Mediated Epigenetic and Proteomic Regulation of Microglial Panoptosis Drives Neuroinflammation in Multiple Sclerosis
Source: Research Square preprint supplement (doi:10.21203/rs.3.rs-6759227/v1), 2025-06-26
Supplement: Supplementary file 6 [file 5bc8126496f56cff6dca9952.xlsx]

## Sheet: NLRC5 on GABARAP (Iceland)
SNP	effect_allele.exposure	other_allele.exposure	effect_allele.outcome	other_allele.outcome	beta.exposure	beta.outcome	eaf.exposure	eaf.outcome	remove	palindromic	ambiguous	id.outcome	pval.outcome	se.outcome	samplesize.outcome	outcome	mr_keep.outcome	pval_origin.outcome	data_source.outcome	chr.exposure	pos.exposure	gene.exposure	pval.exposure	samplesize.exposure	se.exposure	exposure	mr_keep.exposure	pval_origin.exposure	id.exposure	data_source.exposure	action	SNP_index	mr_keep	R2	f	meanf
rs111843362	T	C	T	C	-0.291946	0.0202	0.0537249578345469	0.05142	FALSE	FALSE	FALSE	6Qww3h	0.263313	0.018058	35373	outcome	TRUE	reported	textfile	16	57139069	NLRC5	1.6524e-26	13100	0.0274001297757536	exposure	TRUE	reported	ixaWc3	textfile	2	1	TRUE	0.00859171778440655	113.509561659769	162.966573354567
rs11648592	A	G	A	G	0.228187523693801	-0.0322	0.0228164543009567	0.01831	FALSE	FALSE	FALSE	6Qww3h	0.295632	0.030788	35371	outcome	TRUE	reported	textfile	16	57083232	NLRC5	2.0515e-08	13544	0.040691095205571	exposure	TRUE	reported	ixaWc3	textfile	2	1	TRUE	0.00231649240464254	31.4427770979976	162.966573354567
rs142858325	G	T	CAGT	AAGT	-0.200407	-0.0138	0.0697144228461723	0.03825	TRUE	FALSE	FALSE	6Qww3h	0.508045	0.02085	35369	outcome	TRUE	reported	textfile	16	57043502	NLRC5	1.4422e-16	13100	0.0242593908885033	exposure	TRUE	reported	ixaWc3	textfile	2	1	FALSE	0.00518247690222937	68.2337020502292	162.966573354567
rs154045	A	G	A	G	-0.160195	-0.0033	0.380078537985199	0.59542	FALSE	FALSE	FALSE	6Qww3h	0.684769	0.008129	35371	outcome	TRUE	reported	textfile	16	57114924	NLRC5	2.1875e-39	14258	0.0121997431566727	exposure	TRUE	reported	ixaWc3	textfile	2	1	TRUE	0.0119485866128996	172.398974836304	162.966573354567
rs17369468	T	A	T	A	0.168108709386232	7e-04	0.311610963339887	0.31004	FALSE	TRUE	FALSE	6Qww3h	0.937033	0.008861	35371	outcome	TRUE	reported	textfile	16	57027765	NLRC5	1.3337e-38	13925	0.0129379081376251	exposure	TRUE	reported	ixaWc3	textfile	2	1	TRUE	0.0119790738049778	168.806793626338	162.966573354567
rs185887762	C	T	C	T	0.309850796298539	0.0392	0.0236749116607774	0.0125	FALSE	FALSE	FALSE	6Qww3h	0.276449	0.036018	35372	outcome	TRUE	reported	textfile	16	57547558	NLRC5	3.2366e-10	8906	0.0492835800764325	exposure	TRUE	reported	ixaWc3	textfile	2	1	TRUE	0.00441870262557819	39.5187497815676	162.966573354567
rs2113173	T	C	T	C	-0.107981	-0.0073	0.236963835155593	0.21933	FALSE	FALSE	FALSE	6Qww3h	0.451164	0.009688	35372	outcome	TRUE	reported	textfile	16	57345733	NLRC5	8.9605e-15	14256	0.0139274806145809	exposure	TRUE	reported	ixaWc3	textfile	2	1	TRUE	0.00419880521037533	60.1021265909748	162.966573354567
rs4783965	A	G	A	G	-0.163213	0.0019	0.239134745023396	0.33014	FALSE	FALSE	FALSE	6Qww3h	0.82678	0.008682	35369	outcome	TRUE	reported	textfile	16	57045280	NLRC5	3.323e-31	13925	0.0140479251098678	exposure	TRUE	reported	ixaWc3	textfile	2	1	TRUE	0.00960064295225944	134.965507472421	162.966573354567
rs4784745	G	A	G	A	0.104016490492474	0.007	0.333101582171446	0.31649	FALSE	FALSE	FALSE	6Qww3h	0.418896	0.00866	35369	outcome	TRUE	reported	textfile	16	57014875	NLRC5	1.2318e-16	14263	0.0125620746470464	exposure	TRUE	reported	ixaWc3	textfile	2	1	TRUE	0.00478396656397897	68.5520981141729	162.966573354567
rs4784754	C	T	C	T	-0.381348	-0.0023	0.207185538727498	0.76107	FALSE	FALSE	FALSE	6Qww3h	0.8096	0.009546	35370	outcome	TRUE	reported	textfile	16	57071963	NLRC5	3.2667e-150	14263	0.0146087837356195	exposure	TRUE	reported	ixaWc3	textfile	2	1	TRUE	0.0455968762913984	681.323265440368	162.966573354567
rs55744249	T	C	T	C	-0.252828	-0.0155	0.134480122324159	0.09358	FALSE	FALSE	FALSE	6Qww3h	0.257939	0.013701	35369	outcome	TRUE	reported	textfile	16	57046423	NLRC5	4.6217e-48	14258	0.0173575380532611	exposure	TRUE	reported	ixaWc3	textfile	2	1	TRUE	0.0146622679366409	212.135681911866	162.966573354567
rs56208677	T	C	T	C	-0.176135	0.0092	0.0684235456228739	0.08821	FALSE	FALSE	FALSE	6Qww3h	0.520144	0.014305	35369	outcome	TRUE	reported	textfile	16	57010232	NLRC5	1.5515e-11	11496	0.0261215886124786	exposure	TRUE	reported	ixaWc3	textfile	2	1	TRUE	0.0039394213569394	45.4587904064492	162.966573354567
rs66807230	T	C	T	C	-0.206963	0.0125	0.0356928614277145	0.06003	FALSE	FALSE	FALSE	6Qww3h	0.459127	0.016885	35372	outcome	TRUE	reported	textfile	16	57112289	NLRC5	5.8078e-09	11496	0.0355478427845407	exposure	TRUE	reported	ixaWc3	textfile	2	1	TRUE	0.00293990907773597	33.8909512547441	162.966573354567
rs7198642	G	T	G	T	-0.153832	0.0072	0.192754331241309	0.22202	FALSE	FALSE	FALSE	6Qww3h	0.451978	0.009573	35370	outcome	TRUE	reported	textfile	16	57032461	NLRC5	1.1957e-24	14263	0.0150097903597577	exposure	TRUE	reported	ixaWc3	textfile	2	1	TRUE	0.00731052508077473	105.023172715125	162.966573354567
rs7199577	T	C	T	C	-0.158421	-0.0163	0.354661339421613	0.35177	FALSE	FALSE	FALSE	6Qww3h	0.052577	0.008409	35371	outcome	TRUE	reported	textfile	16	57082766	NLRC5	1.6227e-37	14263	0.0123759570766902	exposure	TRUE	reported	ixaWc3	textfile	2	1	TRUE	0.0113578383729197	163.834943848273	162.966573354567
rs7200295	G	C	G	C	0.0754692909694874	0.0123	0.467323698893259	0.48526	FALSE	TRUE	TRUE	6Qww3h	0.127905	0.008079	35373	outcome	TRUE	reported	textfile	16	57138074	NLRC5	2.0654e-10	14249	0.0118727744780127	exposure	TRUE	reported	ixaWc3	textfile	2	1	FALSE	0.00282762592208361	40.3994209618742	162.966573354567
rs72780022	T	G	T	G	0.151210249527407	0.0021	0.0844558599695586	0.09604	FALSE	FALSE	FALSE	6Qww3h	0.875518	0.013405	35371	outcome	TRUE	reported	textfile	16	57087095	NLRC5	1.2332e-12	14263	0.0212924199514767	exposure	TRUE	reported	ixaWc3	textfile	2	1	TRUE	0.00352345405449183	50.4256507346393	162.966573354567
rs73546834	G	A	G	A	-0.142755	-0.0097	0.0613984784187789	0.07083	FALSE	FALSE	FALSE	6Qww3h	0.532227	0.01553	35369	outcome	TRUE	reported	textfile	16	57069507	NLRC5	7.1825e-09	14255	0.0246707277149154	exposure	TRUE	reported	ixaWc3	textfile	2	1	TRUE	0.00234331568351238	33.4777273205806	162.966573354567
rs76933585	G	T	CACTAGC	CACTAGA	0.360278507453921	0.0252	0.014105419450631	0.023	TRUE	FALSE	FALSE	6Qww3h	0.344467	0.026656	35369	outcome	TRUE	reported	textfile	16	57046069	NLRC5	2.8242e-08	8539	0.0648893244936999	exposure	TRUE	reported	ixaWc3	textfile	2	1	FALSE	0.00359714672307406	30.8197045741984	162.966573354567
rs77294637	A	G	A	G	0.289476312418398	0.0243	0.0452696656633857	0.0365	FALSE	FALSE	FALSE	6Qww3h	0.25596	0.021391	35370	outcome	TRUE	reported	textfile	16	57069011	NLRC5	2.8646e-24	14263	0.0284797096128998	exposure	TRUE	reported	ixaWc3	textfile	2	1	TRUE	0.00719133674239345	103.298507636675	162.966573354567
rs77751805	A	G	A	G	0.240299637790216	0.0267	0.0322917703254055	0.04779	FALSE	FALSE	FALSE	6Qww3h	0.159202	0.018966	35369	outcome	TRUE	reported	textfile	16	56992420	NLRC5	1.019e-09	10333	0.039350806961356	exposure	TRUE	reported	ixaWc3	textfile	2	1	TRUE	0.00359590344469561	37.2833457987378	162.966573354567
rs78053218	C	G	C	G	0.41281226310613	-0.0034	0.0327544426494346	0.02311	FALSE	TRUE	FALSE	6Qww3h	0.896858	0.026228	35370	outcome	TRUE	reported	textfile	16	57077131	NLRC5	2.3181e-35	14262	0.0332652894998372	exposure	TRUE	reported	ixaWc3	textfile	2	1	TRUE	0.0106826198045647	153.979058149166	162.966573354567
rs80162955	A	G	A	G	0.493597929230695	0.0395	0.0193724480738505	0.02105	FALSE	FALSE	FALSE	6Qww3h	0.159602	0.028086	35370	outcome	TRUE	reported	textfile	16	57071555	NLRC5	1.0534e-28	13348	0.0444050746892437	exposure	TRUE	reported	ixaWc3	textfile	2	1	TRUE	0.00917198901831658	123.542495853719	162.966573354567
rs821470	G	A	G	A	0.435734077043571	0.016	0.354241046262543	0.3436	FALSE	FALSE	FALSE	6Qww3h	0.05908	0.008476	35370	outcome	TRUE	reported	textfile	16	57058582	NLRC5	1e-200	14263	0.012379266195728	exposure	TRUE	reported	ixaWc3	textfile	2	1	TRUE	0.0799221132203718	1238.77475267343	162.966573354567

## Sheet: NLRC5 on BRSK2 (Iceland)
SNP	effect_allele.exposure	other_allele.exposure	effect_allele.outcome	other_allele.outcome	beta.exposure	beta.outcome	eaf.exposure	eaf.outcome	remove	palindromic	ambiguous	id.outcome	pval.outcome	se.outcome	samplesize.outcome	outcome	mr_keep.outcome	pval_origin.outcome	data_source.outcome	chr.exposure	pos.exposure	gene.exposure	pval.exposure	samplesize.exposure	se.exposure	exposure	mr_keep.exposure	pval_origin.exposure	id.exposure	data_source.exposure	action	SNP_index	mr_keep	R2	f	meanf
rs111843362	T	C	T	C	-0.291946	0.0096	0.0537249578345469	0.05142	FALSE	FALSE	FALSE	B35mgk	0.598395	0.018226	35373	outcome	TRUE	reported	textfile	16	57139069	NLRC5	1.6524e-26	13100	0.0274001297757536	exposure	TRUE	reported	ipPopY	textfile	2	1	TRUE	0.00859171778440655	113.509561659769	162.966573354567
rs11648592	A	G	A	G	0.228187523693801	-0.0082	0.0228164543009567	0.01831	FALSE	FALSE	FALSE	B35mgk	0.791634	0.031038	35371	outcome	TRUE	reported	textfile	16	57083232	NLRC5	2.0515e-08	13544	0.040691095205571	exposure	TRUE	reported	ipPopY	textfile	2	1	TRUE	0.00231649240464254	31.4427770979976	162.966573354567
rs142858325	G	T	CAGT	AAGT	-0.200407	-0.019	0.0697144228461723	0.03825	TRUE	FALSE	FALSE	B35mgk	0.367636	0.02109	35369	outcome	TRUE	reported	textfile	16	57043502	NLRC5	1.4422e-16	13100	0.0242593908885033	exposure	TRUE	reported	ipPopY	textfile	2	1	FALSE	0.00518247690222937	68.2337020502292	162.966573354567
rs154045	A	G	A	G	-0.160195	-0.0044	0.380078537985199	0.59542	FALSE	FALSE	FALSE	B35mgk	0.5917	0.008203	35371	outcome	TRUE	reported	textfile	16	57114924	NLRC5	2.1875e-39	14258	0.0121997431566727	exposure	TRUE	reported	ipPopY	textfile	2	1	TRUE	0.0119485866128996	172.398974836304	162.966573354567
rs17369468	T	A	T	A	0.168108709386232	0.0068	0.311610963339887	0.31004	FALSE	TRUE	FALSE	B35mgk	0.440764	0.008821	35371	outcome	TRUE	reported	textfile	16	57027765	NLRC5	1.3337e-38	13925	0.0129379081376251	exposure	TRUE	reported	ipPopY	textfile	2	1	TRUE	0.0119790738049778	168.806793626338	162.966573354567
rs185887762	C	T	C	T	0.309850796298539	0.0799	0.0236749116607774	0.0125	FALSE	FALSE	FALSE	B35mgk	0.02762	0.036275	35372	outcome	TRUE	reported	textfile	16	57547558	NLRC5	3.2366e-10	8906	0.0492835800764325	exposure	TRUE	reported	ipPopY	textfile	2	1	TRUE	0.00441870262557819	39.5187497815676	162.966573354567
rs2113173	T	C	T	C	-0.107981	0.0017	0.236963835155593	0.21933	FALSE	FALSE	FALSE	B35mgk	0.861566	0.009749	35372	outcome	TRUE	reported	textfile	16	57345733	NLRC5	8.9605e-15	14256	0.0139274806145809	exposure	TRUE	reported	ipPopY	textfile	2	1	TRUE	0.00419880521037533	60.1021265909748	162.966573354567
rs4783965	A	G	A	G	-0.163213	0.0069	0.239134745023396	0.33014	FALSE	FALSE	FALSE	B35mgk	0.422674	0.008606	35369	outcome	TRUE	reported	textfile	16	57045280	NLRC5	3.323e-31	13925	0.0140479251098678	exposure	TRUE	reported	ipPopY	textfile	2	1	TRUE	0.00960064295225944	134.965507472421	162.966573354567
rs4784745	G	A	G	A	0.104016490492474	6e-04	0.333101582171446	0.31649	FALSE	FALSE	FALSE	B35mgk	0.941235	0.008139	35369	outcome	TRUE	reported	textfile	16	57014875	NLRC5	1.2318e-16	14263	0.0125620746470464	exposure	TRUE	reported	ipPopY	textfile	2	1	TRUE	0.00478396656397897	68.5520981141729	162.966573354567
rs4784754	C	T	C	T	-0.381348	-0.0039	0.207185538727498	0.76107	FALSE	FALSE	FALSE	B35mgk	0.682706	0.009541	35370	outcome	TRUE	reported	textfile	16	57071963	NLRC5	3.2667e-150	14263	0.0146087837356195	exposure	TRUE	reported	ipPopY	textfile	2	1	TRUE	0.0455968762913984	681.323265440368	162.966573354567
rs55744249	T	C	T	C	-0.252828	-0.0231	0.134480122324159	0.09358	FALSE	FALSE	FALSE	B35mgk	0.095117	0.013841	35369	outcome	TRUE	reported	textfile	16	57046423	NLRC5	4.6217e-48	14258	0.0173575380532611	exposure	TRUE	reported	ipPopY	textfile	2	1	TRUE	0.0146622679366409	212.135681911866	162.966573354567
rs56208677	T	C	T	C	-0.176135	-0.0054	0.0684235456228739	0.08821	FALSE	FALSE	FALSE	B35mgk	0.705222	0.014275	35369	outcome	TRUE	reported	textfile	16	57010232	NLRC5	1.5515e-11	11496	0.0261215886124786	exposure	TRUE	reported	ipPopY	textfile	2	1	TRUE	0.0039394213569394	45.4587904064492	162.966573354567
rs66807230	T	C	T	C	-0.206963	0.0113	0.0356928614277145	0.06003	FALSE	FALSE	FALSE	B35mgk	0.505665	0.016977	35372	outcome	TRUE	reported	textfile	16	57112289	NLRC5	5.8078e-09	11496	0.0355478427845407	exposure	TRUE	reported	ipPopY	textfile	2	1	TRUE	0.00293990907773597	33.8909512547441	162.966573354567
rs7198642	G	T	G	T	-0.153832	0.0057	0.192754331241309	0.22202	FALSE	FALSE	FALSE	B35mgk	0.552972	0.009607	35370	outcome	TRUE	reported	textfile	16	57032461	NLRC5	1.1957e-24	14263	0.0150097903597577	exposure	TRUE	reported	ipPopY	textfile	2	1	TRUE	0.00731052508077473	105.023172715125	162.966573354567
rs7199577	T	C	T	C	-0.158421	-0.0174	0.354661339421613	0.35177	FALSE	FALSE	FALSE	B35mgk	0.038794	0.008421	35371	outcome	TRUE	reported	textfile	16	57082766	NLRC5	1.6227e-37	14263	0.0123759570766902	exposure	TRUE	reported	ipPopY	textfile	2	1	TRUE	0.0113578383729197	163.834943848273	162.966573354567
rs7200295	G	C	G	C	0.0754692909694874	0.01	0.467323698893259	0.48526	FALSE	TRUE	TRUE	B35mgk	0.217895	0.008116	35373	outcome	TRUE	reported	textfile	16	57138074	NLRC5	2.0654e-10	14249	0.0118727744780127	exposure	TRUE	reported	ipPopY	textfile	2	1	FALSE	0.00282762592208361	40.3994209618742	162.966573354567
rs72780022	T	G	T	G	0.151210249527407	0.0283	0.0844558599695586	0.09604	FALSE	FALSE	FALSE	B35mgk	0.039746	0.013762	35371	outcome	TRUE	reported	textfile	16	57087095	NLRC5	1.2332e-12	14263	0.0212924199514767	exposure	TRUE	reported	ipPopY	textfile	2	1	TRUE	0.00352345405449183	50.4256507346393	162.966573354567
rs73546834	G	A	G	A	-0.142755	-0.0047	0.0613984784187789	0.07083	FALSE	FALSE	FALSE	B35mgk	0.762262	0.015537	35369	outcome	TRUE	reported	textfile	16	57069507	NLRC5	7.1825e-09	14255	0.0246707277149154	exposure	TRUE	reported	ipPopY	textfile	2	1	TRUE	0.00234331568351238	33.4777273205806	162.966573354567
rs76933585	G	T	CACTAGC	CACTAGA	0.360278507453921	-0.0088	0.014105419450631	0.023	TRUE	FALSE	FALSE	B35mgk	0.741575	0.026685	35369	outcome	TRUE	reported	textfile	16	57046069	NLRC5	2.8242e-08	8539	0.0648893244936999	exposure	TRUE	reported	ipPopY	textfile	2	1	FALSE	0.00359714672307406	30.8197045741984	162.966573354567
rs77294637	A	G	A	G	0.289476312418398	0.0089	0.0452696656633857	0.0365	FALSE	FALSE	FALSE	B35mgk	0.679338	0.021531	35370	outcome	TRUE	reported	textfile	16	57069011	NLRC5	2.8646e-24	14263	0.0284797096128998	exposure	TRUE	reported	ipPopY	textfile	2	1	TRUE	0.00719133674239345	103.298507636675	162.966573354567
rs77751805	A	G	A	G	0.240299637790216	0.0482	0.0322917703254055	0.04779	FALSE	FALSE	FALSE	B35mgk	0.011646	0.019107	35369	outcome	TRUE	reported	textfile	16	56992420	NLRC5	1.019e-09	10333	0.039350806961356	exposure	TRUE	reported	ipPopY	textfile	2	1	TRUE	0.00359590344469561	37.2833457987378	162.966573354567
rs78053218	C	G	C	G	0.41281226310613	-0.012	0.0327544426494346	0.02311	FALSE	TRUE	FALSE	B35mgk	0.652126	0.026619	35370	outcome	TRUE	reported	textfile	16	57077131	NLRC5	2.3181e-35	14262	0.0332652894998372	exposure	TRUE	reported	ipPopY	textfile	2	1	TRUE	0.0106826198045647	153.979058149166	162.966573354567
rs80162955	A	G	A	G	0.493597929230695	0.0018	0.0193724480738505	0.02105	FALSE	FALSE	FALSE	B35mgk	0.949827	0.028606	35370	outcome	TRUE	reported	textfile	16	57071555	NLRC5	1.0534e-28	13348	0.0444050746892437	exposure	TRUE	reported	ipPopY	textfile	2	1	TRUE	0.00917198901831658	123.542495853719	162.966573354567
rs821470	G	A	G	A	0.435734077043571	0.014	0.354241046262543	0.3436	FALSE	FALSE	FALSE	B35mgk	0.100087	0.008514	35370	outcome	TRUE	reported	textfile	16	57058582	NLRC5	1e-200	14263	0.012379266195728	exposure	TRUE	reported	ipPopY	textfile	2	1	TRUE	0.0799221132203718	1238.77475267343	162.966573354567

## Sheet: NLRC5 on TNFSF12 (Iceland)
SNP	effect_allele.exposure	other_allele.exposure	effect_allele.outcome	other_allele.outcome	beta.exposure	beta.outcome	eaf.exposure	eaf.outcome	remove	palindromic	ambiguous	id.outcome	pval.outcome	se.outcome	samplesize.outcome	outcome	mr_keep.outcome	pval_origin.outcome	data_source.outcome	chr.exposure	pos.exposure	gene.exposure	pval.exposure	samplesize.exposure	se.exposure	exposure	mr_keep.exposure	pval_origin.exposure	id.exposure	data_source.exposure	action	SNP_index	mr_keep	R2	f	meanf
rs111843362	T	C	T	C	-0.291946	-0.0073	0.0537249578345469	0.05142	FALSE	FALSE	FALSE	uubASp	0.690591	0.018339	35373	outcome	TRUE	reported	textfile	16	57139069	NLRC5	1.6524e-26	13100	0.0274001297757536	exposure	TRUE	reported	sZnAIT	textfile	2	1	TRUE	0.00859171778440655	113.509561659769	162.966573354567
rs11648592	A	G	A	G	0.228187523693801	0.014	0.0228164543009567	0.01831	FALSE	FALSE	FALSE	uubASp	0.654246	0.031259	35371	outcome	TRUE	reported	textfile	16	57083232	NLRC5	2.0515e-08	13544	0.040691095205571	exposure	TRUE	reported	sZnAIT	textfile	2	1	TRUE	0.00231649240464254	31.4427770979976	162.966573354567
rs142858325	G	T	CAGT	AAGT	-0.200407	-0.0375	0.0697144228461723	0.03825	TRUE	FALSE	FALSE	uubASp	0.076268	0.021153	35369	outcome	TRUE	reported	textfile	16	57043502	NLRC5	1.4422e-16	13100	0.0242593908885033	exposure	TRUE	reported	sZnAIT	textfile	2	1	FALSE	0.00518247690222937	68.2337020502292	162.966573354567
rs154045	A	G	A	G	-0.160195	-0.0006	0.380078537985199	0.59542	FALSE	FALSE	FALSE	uubASp	0.941943	0.008239	35371	outcome	TRUE	reported	textfile	16	57114924	NLRC5	2.1875e-39	14258	0.0121997431566727	exposure	TRUE	reported	sZnAIT	textfile	2	1	TRUE	0.0119485866128996	172.398974836304	162.966573354567
rs17369468	T	A	T	A	0.168108709386232	0.0053	0.311610963339887	0.31004	FALSE	TRUE	FALSE	uubASp	0.547926	0.008821	35371	outcome	TRUE	reported	textfile	16	57027765	NLRC5	1.3337e-38	13925	0.0129379081376251	exposure	TRUE	reported	sZnAIT	textfile	2	1	TRUE	0.0119790738049778	168.806793626338	162.966573354567
rs185887762	C	T	C	T	0.309850796298539	0.0131	0.0236749116607774	0.0125	FALSE	FALSE	FALSE	uubASp	0.719395	0.036463	35372	outcome	TRUE	reported	textfile	16	57547558	NLRC5	3.2366e-10	8906	0.0492835800764325	exposure	TRUE	reported	sZnAIT	textfile	2	1	TRUE	0.00441870262557819	39.5187497815676	162.966573354567
rs2113173	T	C	T	C	-0.107981	0.0124	0.236963835155593	0.21933	FALSE	FALSE	FALSE	uubASp	0.20391	0.00976	35372	outcome	TRUE	reported	textfile	16	57345733	NLRC5	8.9605e-15	14256	0.0139274806145809	exposure	TRUE	reported	sZnAIT	textfile	2	1	TRUE	0.00419880521037533	60.1021265909748	162.966573354567
rs4783965	A	G	A	G	-0.163213	-0.008	0.239134745023396	0.33014	FALSE	FALSE	FALSE	uubASp	0.353663	0.008625	35369	outcome	TRUE	reported	textfile	16	57045280	NLRC5	3.323e-31	13925	0.0140479251098678	exposure	TRUE	reported	sZnAIT	textfile	2	1	TRUE	0.00960064295225944	134.965507472421	162.966573354567
rs4784745	G	A	G	A	0.104016490492474	0.0095	0.333101582171446	0.31649	FALSE	FALSE	FALSE	uubASp	0.279218	0.008779	35369	outcome	TRUE	reported	textfile	16	57014875	NLRC5	1.2318e-16	14263	0.0125620746470464	exposure	TRUE	reported	sZnAIT	textfile	2	1	TRUE	0.00478396656397897	68.5520981141729	162.966573354567
rs4784754	C	T	C	T	-0.381348	-0.0007	0.207185538727498	0.76107	FALSE	FALSE	FALSE	uubASp	0.942445	0.009696	35370	outcome	TRUE	reported	textfile	16	57071963	NLRC5	3.2667e-150	14263	0.0146087837356195	exposure	TRUE	reported	sZnAIT	textfile	2	1	TRUE	0.0455968762913984	681.323265440368	162.966573354567
rs55744249	T	C	T	C	-0.252828	-0.0181	0.134480122324159	0.09358	FALSE	FALSE	FALSE	uubASp	0.192277	0.013882	35369	outcome	TRUE	reported	textfile	16	57046423	NLRC5	4.6217e-48	14258	0.0173575380532611	exposure	TRUE	reported	sZnAIT	textfile	2	1	TRUE	0.0146622679366409	212.135681911866	162.966573354567
rs56208677	T	C	T	C	-0.176135	-0.0131	0.0684235456228739	0.08821	FALSE	FALSE	FALSE	uubASp	0.362708	0.014392	35369	outcome	TRUE	reported	textfile	16	57010232	NLRC5	1.5515e-11	11496	0.0261215886124786	exposure	TRUE	reported	sZnAIT	textfile	2	1	TRUE	0.0039394213569394	45.4587904064492	162.966573354567
rs66807230	T	C	T	C	-0.206963	0.0072	0.0356928614277145	0.06003	FALSE	FALSE	FALSE	uubASp	0.673492	0.017088	35372	outcome	TRUE	reported	textfile	16	57112289	NLRC5	5.8078e-09	11496	0.0355478427845407	exposure	TRUE	reported	sZnAIT	textfile	2	1	TRUE	0.00293990907773597	33.8909512547441	162.966573354567
rs7198642	G	T	G	T	-0.153832	0.0044	0.192754331241309	0.22202	FALSE	FALSE	FALSE	uubASp	0.651133	0.00973	35370	outcome	TRUE	reported	textfile	16	57032461	NLRC5	1.1957e-24	14263	0.0150097903597577	exposure	TRUE	reported	sZnAIT	textfile	2	1	TRUE	0.00731052508077473	105.023172715125	162.966573354567
rs7199577	T	C	T	C	-0.158421	-0.0139	0.354661339421613	0.35177	FALSE	FALSE	FALSE	uubASp	0.101831	0.008496	35371	outcome	TRUE	reported	textfile	16	57082766	NLRC5	1.6227e-37	14263	0.0123759570766902	exposure	TRUE	reported	sZnAIT	textfile	2	1	TRUE	0.0113578383729197	163.834943848273	162.966573354567
rs7200295	G	C	G	C	0.0754692909694874	0.0039	0.467323698893259	0.48526	FALSE	TRUE	TRUE	uubASp	0.630382	0.008105	35373	outcome	TRUE	reported	textfile	16	57138074	NLRC5	2.0654e-10	14249	0.0118727744780127	exposure	TRUE	reported	sZnAIT	textfile	2	1	FALSE	0.00282762592208361	40.3994209618742	162.966573354567
rs72780022	T	G	T	G	0.151210249527407	0.03	0.0844558599695586	0.09604	FALSE	FALSE	FALSE	uubASp	0.030594	0.013874	35371	outcome	TRUE	reported	textfile	16	57087095	NLRC5	1.2332e-12	14263	0.0212924199514767	exposure	TRUE	reported	sZnAIT	textfile	2	1	TRUE	0.00352345405449183	50.4256507346393	162.966573354567
rs73546834	G	A	G	A	-0.142755	-0.0233	0.0613984784187789	0.07083	FALSE	FALSE	FALSE	uubASp	0.138189	0.015716	35369	outcome	TRUE	reported	textfile	16	57069507	NLRC5	7.1825e-09	14255	0.0246707277149154	exposure	TRUE	reported	sZnAIT	textfile	2	1	TRUE	0.00234331568351238	33.4777273205806	162.966573354567
rs76933585	G	T	CACTAGC	CACTAGA	0.360278507453921	0.0106	0.014105419450631	0.023	TRUE	FALSE	FALSE	uubASp	0.692839	0.026835	35369	outcome	TRUE	reported	textfile	16	57046069	NLRC5	2.8242e-08	8539	0.0648893244936999	exposure	TRUE	reported	sZnAIT	textfile	2	1	FALSE	0.00359714672307406	30.8197045741984	162.966573354567
rs77294637	A	G	A	G	0.289476312418398	0.0196	0.0452696656633857	0.0365	FALSE	FALSE	FALSE	uubASp	0.364756	0.021625	35370	outcome	TRUE	reported	textfile	16	57069011	NLRC5	2.8646e-24	14263	0.0284797096128998	exposure	TRUE	reported	sZnAIT	textfile	2	1	TRUE	0.00719133674239345	103.298507636675	162.966573354567
rs77751805	A	G	A	G	0.240299637790216	0.0158	0.0322917703254055	0.04779	FALSE	FALSE	FALSE	uubASp	0.411548	0.019241	35369	outcome	TRUE	reported	textfile	16	56992420	NLRC5	1.019e-09	10333	0.039350806961356	exposure	TRUE	reported	sZnAIT	textfile	2	1	TRUE	0.00359590344469561	37.2833457987378	162.966573354567
rs78053218	C	G	C	G	0.41281226310613	-0.0363	0.0327544426494346	0.02311	FALSE	TRUE	FALSE	uubASp	0.175968	0.026824	35370	outcome	TRUE	reported	textfile	16	57077131	NLRC5	2.3181e-35	14262	0.0332652894998372	exposure	TRUE	reported	sZnAIT	textfile	2	1	TRUE	0.0106826198045647	153.979058149166	162.966573354567
rs80162955	A	G	A	G	0.493597929230695	-0.0056	0.0193724480738505	0.02105	FALSE	FALSE	FALSE	uubASp	0.844996	0.028643	35370	outcome	TRUE	reported	textfile	16	57071555	NLRC5	1.0534e-28	13348	0.0444050746892437	exposure	TRUE	reported	sZnAIT	textfile	2	1	TRUE	0.00917198901831658	123.542495853719	162.966573354567
rs821470	G	A	G	A	0.435734077043571	0.0099	0.354241046262543	0.3436	FALSE	FALSE	FALSE	uubASp	0.247394	0.008559	35370	outcome	TRUE	reported	textfile	16	57058582	NLRC5	1e-200	14263	0.012379266195728	exposure	TRUE	reported	sZnAIT	textfile	2	1	TRUE	0.0799221132203718	1238.77475267343	162.966573354567

## Sheet: NLRC5 on BCL2 (Iceland)
SNP	effect_allele.exposure	other_allele.exposure	effect_allele.outcome	other_allele.outcome	beta.exposure	beta.outcome	eaf.exposure	eaf.outcome	remove	palindromic	ambiguous	id.outcome	pval.outcome	se.outcome	samplesize.outcome	outcome	mr_keep.outcome	pval_origin.outcome	data_source.outcome	chr.exposure	pos.exposure	gene.exposure	pval.exposure	samplesize.exposure	se.exposure	exposure	mr_keep.exposure	pval_origin.exposure	id.exposure	data_source.exposure	action	SNP_index	mr_keep	R2	f	meanf
rs111843362	T	C	T	C	-0.291946	0.0043	0.0537249578345469	0.05142	FALSE	FALSE	FALSE	kA2nPD	0.814247	0.018302	35373	outcome	TRUE	reported	textfile	16	57139069	NLRC5	1.6524e-26	13100	0.0274001297757536	exposure	TRUE	reported	TkJ7m6	textfile	2	1	TRUE	0.00859171778440655	113.509561659769	162.966573354567
rs11648592	A	G	A	G	0.228187523693801	-0.0035	0.0228164543009567	0.01831	FALSE	FALSE	FALSE	kA2nPD	0.909166	0.030677	35371	outcome	TRUE	reported	textfile	16	57083232	NLRC5	2.0515e-08	13544	0.040691095205571	exposure	TRUE	reported	TkJ7m6	textfile	2	1	TRUE	0.00231649240464254	31.4427770979976	162.966573354567
rs142858325	G	T	CAGT	AAGT	-0.200407	-0.0172	0.0697144228461723	0.03825	TRUE	FALSE	FALSE	kA2nPD	0.41296	0.021009	35369	outcome	TRUE	reported	textfile	16	57043502	NLRC5	1.4422e-16	13100	0.0242593908885033	exposure	TRUE	reported	TkJ7m6	textfile	2	1	FALSE	0.00518247690222937	68.2337020502292	162.966573354567
rs154045	A	G	A	G	-0.160195	0.0026	0.380078537985199	0.59542	FALSE	FALSE	FALSE	kA2nPD	0.757581	0.008424	35371	outcome	TRUE	reported	textfile	16	57114924	NLRC5	2.1875e-39	14258	0.0121997431566727	exposure	TRUE	reported	TkJ7m6	textfile	2	1	TRUE	0.0119485866128996	172.398974836304	162.966573354567
rs17369468	T	A	T	A	0.168108709386232	0.0128	0.311610963339887	0.31004	FALSE	TRUE	FALSE	kA2nPD	0.144689	0.008776	35371	outcome	TRUE	reported	textfile	16	57027765	NLRC5	1.3337e-38	13925	0.0129379081376251	exposure	TRUE	reported	TkJ7m6	textfile	2	1	TRUE	0.0119790738049778	168.806793626338	162.966573354567
rs185887762	C	T	C	T	0.309850796298539	0.0413	0.0236749116607774	0.0125	FALSE	FALSE	FALSE	kA2nPD	0.253849	0.036195	35372	outcome	TRUE	reported	textfile	16	57547558	NLRC5	3.2366e-10	8906	0.0492835800764325	exposure	TRUE	reported	TkJ7m6	textfile	2	1	TRUE	0.00441870262557819	39.5187497815676	162.966573354567
rs2113173	T	C	T	C	-0.107981	0.0047	0.236963835155593	0.21933	FALSE	FALSE	FALSE	kA2nPD	0.623454	0.009573	35372	outcome	TRUE	reported	textfile	16	57345733	NLRC5	8.9605e-15	14256	0.0139274806145809	exposure	TRUE	reported	TkJ7m6	textfile	2	1	TRUE	0.00419880521037533	60.1021265909748	162.966573354567
rs4783965	A	G	A	G	-0.163213	0.004	0.239134745023396	0.33014	FALSE	FALSE	FALSE	kA2nPD	0.63753	0.00849	35369	outcome	TRUE	reported	textfile	16	57045280	NLRC5	3.323e-31	13925	0.0140479251098678	exposure	TRUE	reported	TkJ7m6	textfile	2	1	TRUE	0.00960064295225944	134.965507472421	162.966573354567
rs4784745	G	A	G	A	0.104016490492474	0.0091	0.333101582171446	0.31649	FALSE	FALSE	FALSE	kA2nPD	0.292947	0.008653	35369	outcome	TRUE	reported	textfile	16	57014875	NLRC5	1.2318e-16	14263	0.0125620746470464	exposure	TRUE	reported	TkJ7m6	textfile	2	1	TRUE	0.00478396656397897	68.5520981141729	162.966573354567
rs4784754	C	T	C	T	-0.381348	0.0024	0.207185538727498	0.76107	FALSE	FALSE	FALSE	kA2nPD	0.801874	0.009565	35370	outcome	TRUE	reported	textfile	16	57071963	NLRC5	3.2667e-150	14263	0.0146087837356195	exposure	TRUE	reported	TkJ7m6	textfile	2	1	TRUE	0.0455968762913984	681.323265440368	162.966573354567
rs55744249	T	C	T	C	-0.252828	-0.0139	0.134480122324159	0.09358	FALSE	FALSE	FALSE	kA2nPD	0.312004	0.013748	35369	outcome	TRUE	reported	textfile	16	57046423	NLRC5	4.6217e-48	14258	0.0173575380532611	exposure	TRUE	reported	TkJ7m6	textfile	2	1	TRUE	0.0146622679366409	212.135681911866	162.966573354567
rs56208677	T	C	T	C	-0.176135	-0.0037	0.0684235456228739	0.08821	FALSE	FALSE	FALSE	kA2nPD	0.797188	0.014398	35369	outcome	TRUE	reported	textfile	16	57010232	NLRC5	1.5515e-11	11496	0.0261215886124786	exposure	TRUE	reported	TkJ7m6	textfile	2	1	TRUE	0.0039394213569394	45.4587904064492	162.966573354567
rs66807230	T	C	T	C	-0.206963	0.0102	0.0356928614277145	0.06003	FALSE	FALSE	FALSE	kA2nPD	0.54426	0.016821	35372	outcome	TRUE	reported	textfile	16	57112289	NLRC5	5.8078e-09	11496	0.0355478427845407	exposure	TRUE	reported	TkJ7m6	textfile	2	1	TRUE	0.00293990907773597	33.8909512547441	162.966573354567
rs7198642	G	T	G	T	-0.153832	0.0027	0.192754331241309	0.22202	FALSE	FALSE	FALSE	kA2nPD	0.777904	0.009573	35370	outcome	TRUE	reported	textfile	16	57032461	NLRC5	1.1957e-24	14263	0.0150097903597577	exposure	TRUE	reported	TkJ7m6	textfile	2	1	TRUE	0.00731052508077473	105.023172715125	162.966573354567
rs7199577	T	C	T	C	-0.158421	-0.0139	0.354661339421613	0.35177	FALSE	FALSE	FALSE	kA2nPD	0.097734	0.008394	35371	outcome	TRUE	reported	textfile	16	57082766	NLRC5	1.6227e-37	14263	0.0123759570766902	exposure	TRUE	reported	TkJ7m6	textfile	2	1	TRUE	0.0113578383729197	163.834943848273	162.966573354567
rs7200295	G	C	G	C	0.0754692909694874	0.0136	0.467323698893259	0.48526	FALSE	TRUE	TRUE	kA2nPD	0.091762	0.008066	35373	outcome	TRUE	reported	textfile	16	57138074	NLRC5	2.0654e-10	14249	0.0118727744780127	exposure	TRUE	reported	TkJ7m6	textfile	2	1	FALSE	0.00282762592208361	40.3994209618742	162.966573354567
rs72780022	T	G	T	G	0.151210249527407	0.0092	0.0844558599695586	0.09604	FALSE	FALSE	FALSE	kA2nPD	0.501637	0.013692	35371	outcome	TRUE	reported	textfile	16	57087095	NLRC5	1.2332e-12	14263	0.0212924199514767	exposure	TRUE	reported	TkJ7m6	textfile	2	1	TRUE	0.00352345405449183	50.4256507346393	162.966573354567
rs73546834	G	A	G	A	-0.142755	0.0015	0.0613984784187789	0.07083	FALSE	FALSE	FALSE	kA2nPD	0.924106	0.015746	35369	outcome	TRUE	reported	textfile	16	57069507	NLRC5	7.1825e-09	14255	0.0246707277149154	exposure	TRUE	reported	TkJ7m6	textfile	2	1	TRUE	0.00234331568351238	33.4777273205806	162.966573354567
rs76933585	G	T	CACTAGC	CACTAGA	0.360278507453921	0.0011	0.014105419450631	0.023	TRUE	FALSE	FALSE	kA2nPD	0.966083	0.025869	35369	outcome	TRUE	reported	textfile	16	57046069	NLRC5	2.8242e-08	8539	0.0648893244936999	exposure	TRUE	reported	TkJ7m6	textfile	2	1	FALSE	0.00359714672307406	30.8197045741984	162.966573354567
rs77294637	A	G	A	G	0.289476312418398	0.0112	0.0452696656633857	0.0365	FALSE	FALSE	FALSE	kA2nPD	0.6026	0.021511	35370	outcome	TRUE	reported	textfile	16	57069011	NLRC5	2.8646e-24	14263	0.0284797096128998	exposure	TRUE	reported	TkJ7m6	textfile	2	1	TRUE	0.00719133674239345	103.298507636675	162.966573354567
rs77751805	A	G	A	G	0.240299637790216	0.0279	0.0322917703254055	0.04779	FALSE	FALSE	FALSE	kA2nPD	0.143228	0.019059	35369	outcome	TRUE	reported	textfile	16	56992420	NLRC5	1.019e-09	10333	0.039350806961356	exposure	TRUE	reported	TkJ7m6	textfile	2	1	TRUE	0.00359590344469561	37.2833457987378	162.966573354567
rs78053218	C	G	C	G	0.41281226310613	-0.0084	0.0327544426494346	0.02311	FALSE	TRUE	FALSE	kA2nPD	0.752998	0.026693	35370	outcome	TRUE	reported	textfile	16	57077131	NLRC5	2.3181e-35	14262	0.0332652894998372	exposure	TRUE	reported	TkJ7m6	textfile	2	1	TRUE	0.0106826198045647	153.979058149166	162.966573354567
rs80162955	A	G	A	G	0.493597929230695	0.0056	0.0193724480738505	0.02105	FALSE	FALSE	FALSE	kA2nPD	0.841673	0.028034	35370	outcome	TRUE	reported	textfile	16	57071555	NLRC5	1.0534e-28	13348	0.0444050746892437	exposure	TRUE	reported	TkJ7m6	textfile	2	1	TRUE	0.00917198901831658	123.542495853719	162.966573354567
rs821470	G	A	G	A	0.435734077043571	0.0166	0.354241046262543	0.3436	FALSE	FALSE	FALSE	kA2nPD	0.051084	0.008509	35370	outcome	TRUE	reported	textfile	16	57058582	NLRC5	1e-200	14263	0.012379266195728	exposure	TRUE	reported	TkJ7m6	textfile	2	1	TRUE	0.0799221132203718	1238.77475267343	162.966573354567

## Sheet: NLRC5 on GABARAP (UKB-PPP)
SNP	effect_allele.exposure	other_allele.exposure	effect_allele.outcome	other_allele.outcome	beta.exposure	beta.outcome	eaf.exposure	eaf.outcome	remove	palindromic	ambiguous	id.outcome	samplesize.outcome	se.outcome	pval.outcome	gene.outcome	outcome	mr_keep.outcome	pval_origin.outcome	data_source.outcome	chr.exposure	pos.exposure	gene.exposure	pval.exposure	samplesize.exposure	se.exposure	exposure	mr_keep.exposure	pval_origin.exposure	id.exposure	data_source.exposure	action	SNP_index	mr_keep	R2	f	meanf
rs111843362	T	C	T	C	-0.291946	-0.0190015	0.0537249578345469	0.0515382	FALSE	FALSE	FALSE	XdQPXn	33777	0.0175438	0.278768693701813	GABARAP	outcome	TRUE	reported	textfile	16	57139069	NLRC5	1.6524e-26	13100	0.0274001297757536	exposure	TRUE	reported	cNHbmg	textfile	2	1	TRUE	0.00859171778440655	113.509561659769	162.966573354567
rs11648592	A	G	A	G	0.228187523693801	0.0128179	0.0228164543009567	0.0207971	FALSE	FALSE	FALSE	XdQPXn	33777	0.0268275	0.632800771537256	GABARAP	outcome	TRUE	reported	textfile	16	57083232	NLRC5	2.0515e-08	13544	0.040691095205571	exposure	TRUE	reported	cNHbmg	textfile	2	1	TRUE	0.00231649240464254	31.4427770979976	162.966573354567
rs142858325	G	T	G	T	-0.200407	-0.0187235	0.0697144228461723	0.0568831	FALSE	FALSE	FALSE	XdQPXn	33777	0.0169568	0.269513174824245	GABARAP	outcome	TRUE	reported	textfile	16	57043502	NLRC5	1.4422e-16	13100	0.0242593908885033	exposure	TRUE	reported	cNHbmg	textfile	2	1	TRUE	0.00518247690222937	68.2337020502292	162.966573354567
rs154045	A	G	A	G	-0.160195	-0.0116151	0.380078537985199	0.397853	FALSE	FALSE	FALSE	XdQPXn	33777	0.00772511	0.132695440351717	GABARAP	outcome	TRUE	reported	textfile	16	57114924	NLRC5	2.1875e-39	14258	0.0121997431566727	exposure	TRUE	reported	cNHbmg	textfile	2	1	TRUE	0.0119485866128996	172.398974836304	162.966573354567
rs17369468	T	A	T	A	0.168108709386232	0.00607972	0.311610963339887	0.301892	FALSE	TRUE	FALSE	XdQPXn	33777	0.00822398	0.459743925811037	GABARAP	outcome	TRUE	reported	textfile	16	57027765	NLRC5	1.3337e-38	13925	0.0129379081376251	exposure	TRUE	reported	cNHbmg	textfile	2	1	TRUE	0.0119790738049778	168.806793626338	162.966573354567
rs185887762	C	T	C	T	0.309850796298539	0.0536951	0.0236749116607774	0.0145896	FALSE	FALSE	FALSE	XdQPXn	33777	0.0330319	0.10404470903073	GABARAP	outcome	TRUE	reported	textfile	16	57547558	NLRC5	3.2366e-10	8906	0.0492835800764325	exposure	TRUE	reported	cNHbmg	textfile	2	1	TRUE	0.00441870262557819	39.5187497815676	162.966573354567
rs2113173	T	C	T	C	-0.107981	-0.00751183	0.236963835155593	0.22561	FALSE	FALSE	FALSE	XdQPXn	33777	0.00906995	0.40755103463257	GABARAP	outcome	TRUE	reported	textfile	16	57345733	NLRC5	8.9605e-15	14256	0.0139274806145809	exposure	TRUE	reported	cNHbmg	textfile	2	1	TRUE	0.00419880521037533	60.1021265909748	162.966573354567
rs4783965	A	G	A	G	-0.163213	-0.00176985	0.239134745023396	0.265016	FALSE	FALSE	FALSE	XdQPXn	33777	0.00882214	0.84100039543214	GABARAP	outcome	TRUE	reported	textfile	16	57045280	NLRC5	3.323e-31	13925	0.0140479251098678	exposure	TRUE	reported	cNHbmg	textfile	2	1	TRUE	0.00960064295225944	134.965507472421	162.966573354567
rs4784745	G	A	G	A	0.104016490492474	0.0017706	0.333101582171446	0.341733	FALSE	FALSE	FALSE	XdQPXn	33777	0.00800232	0.824888976694273	GABARAP	outcome	TRUE	reported	textfile	16	57014875	NLRC5	1.2318e-16	14263	0.0125620746470464	exposure	TRUE	reported	cNHbmg	textfile	2	1	TRUE	0.00478396656397897	68.5520981141729	162.966573354567
rs4784754	C	T	C	T	-0.381348	-0.0164466	0.207185538727498	0.204051	FALSE	FALSE	FALSE	XdQPXn	33777	0.00943381	0.0812680801039423	GABARAP	outcome	TRUE	reported	textfile	16	57071963	NLRC5	3.2667e-150	14263	0.0146087837356195	exposure	TRUE	reported	cNHbmg	textfile	2	1	TRUE	0.0455968762913984	681.323265440368	162.966573354567
rs55744249	T	C	T	C	-0.252828	-0.00654547	0.134480122324159	0.129733	FALSE	FALSE	FALSE	XdQPXn	33777	0.0113236	0.563239364752355	GABARAP	outcome	TRUE	reported	textfile	16	57046423	NLRC5	4.6217e-48	14258	0.0173575380532611	exposure	TRUE	reported	cNHbmg	textfile	2	1	TRUE	0.0146622679366409	212.135681911866	162.966573354567
rs56208677	T	C	T	C	-0.176135	-0.000814459	0.0684235456228739	0.0685822	FALSE	FALSE	FALSE	XdQPXn	33777	0.014902	0.956413725386414	GABARAP	outcome	TRUE	reported	textfile	16	57010232	NLRC5	1.5515e-11	11496	0.0261215886124786	exposure	TRUE	reported	cNHbmg	textfile	2	1	TRUE	0.0039394213569394	45.4587904064492	162.966573354567
rs66807230	T	C	T	C	-0.206963	0.0123836	0.0356928614277145	0.0469106	FALSE	FALSE	FALSE	XdQPXn	33777	0.0178908	0.488826790832275	GABARAP	outcome	TRUE	reported	textfile	16	57112289	NLRC5	5.8078e-09	11496	0.0355478427845407	exposure	TRUE	reported	cNHbmg	textfile	2	1	TRUE	0.00293990907773597	33.8909512547441	162.966573354567
rs7198642	G	T	G	T	-0.153832	-0.00528983	0.192754331241309	0.20502	FALSE	FALSE	FALSE	XdQPXn	33777	0.00948882	0.57719957148524	GABARAP	outcome	TRUE	reported	textfile	16	57032461	NLRC5	1.1957e-24	14263	0.0150097903597577	exposure	TRUE	reported	cNHbmg	textfile	2	1	TRUE	0.00731052508077473	105.023172715125	162.966573354567
rs7199577	T	C	T	C	-0.158421	-0.0165295	0.354661339421613	0.35983	FALSE	FALSE	FALSE	XdQPXn	33777	0.00794442	0.0374670931446148	GABARAP	outcome	TRUE	reported	textfile	16	57082766	NLRC5	1.6227e-37	14263	0.0123759570766902	exposure	TRUE	reported	cNHbmg	textfile	2	1	TRUE	0.0113578383729197	163.834943848273	162.966573354567
rs7200295	G	C	G	C	0.0754692909694874	-0.00964961	0.467323698893259	0.485351	FALSE	TRUE	TRUE	XdQPXn	33777	0.00772456	0.211587496485851	GABARAP	outcome	TRUE	reported	textfile	16	57138074	NLRC5	2.0654e-10	14249	0.0118727744780127	exposure	TRUE	reported	cNHbmg	textfile	2	1	FALSE	0.00282762592208361	40.3994209618742	162.966573354567
rs72780022	T	G	T	G	0.151210249527407	0.0285041	0.0844558599695586	0.0923261	FALSE	FALSE	FALSE	XdQPXn	33777	0.0130039	0.0283818042248101	GABARAP	outcome	TRUE	reported	textfile	16	57087095	NLRC5	1.2332e-12	14263	0.0212924199514767	exposure	TRUE	reported	cNHbmg	textfile	2	1	TRUE	0.00352345405449183	50.4256507346393	162.966573354567
rs73546834	G	A	G	A	-0.142755	0.00986441	0.0613984784187789	0.0642076	FALSE	FALSE	FALSE	XdQPXn	33777	0.0155933	0.52699075930735	GABARAP	outcome	TRUE	reported	textfile	16	57069507	NLRC5	7.1825e-09	14255	0.0246707277149154	exposure	TRUE	reported	cNHbmg	textfile	2	1	TRUE	0.00234331568351238	33.4777273205806	162.966573354567
rs76933585	G	T	G	T	0.360278507453921	0.049131	0.014105419450631	0.0151739	FALSE	FALSE	FALSE	XdQPXn	33777	0.0341001	0.149644927435705	GABARAP	outcome	TRUE	reported	textfile	16	57046069	NLRC5	2.8242e-08	8539	0.0648893244936999	exposure	TRUE	reported	cNHbmg	textfile	2	1	TRUE	0.00359714672307406	30.8197045741984	162.966573354567
rs77294637	A	G	A	G	0.289476312418398	-0.00548488	0.0452696656633857	0.0481674	FALSE	FALSE	FALSE	XdQPXn	33777	0.0178906	0.759164689759835	GABARAP	outcome	TRUE	reported	textfile	16	57069011	NLRC5	2.8646e-24	14263	0.0284797096128998	exposure	TRUE	reported	cNHbmg	textfile	2	1	TRUE	0.00719133674239345	103.298507636675	162.966573354567
rs77751805	A	G	A	G	0.240299637790216	0.00268147	0.0322917703254055	0.033958	FALSE	FALSE	FALSE	XdQPXn	33777	0.0207353	0.89710546019704	GABARAP	outcome	TRUE	reported	textfile	16	56992420	NLRC5	1.019e-09	10333	0.039350806961356	exposure	TRUE	reported	cNHbmg	textfile	2	1	TRUE	0.00359590344469561	37.2833457987378	162.966573354567
rs78053218	C	G	C	G	0.41281226310613	0.00703619	0.0327544426494346	0.0252379	FALSE	TRUE	FALSE	XdQPXn	33777	0.0243483	0.772596968968862	GABARAP	outcome	TRUE	reported	textfile	16	57077131	NLRC5	2.3181e-35	14262	0.0332652894998372	exposure	TRUE	reported	cNHbmg	textfile	2	1	TRUE	0.0106826198045647	153.979058149166	162.966573354567
rs80162955	A	G	A	G	0.493597929230695	-0.0177348	0.0193724480738505	0.0289732	FALSE	FALSE	FALSE	XdQPXn	33777	0.0227529	0.435713483769302	GABARAP	outcome	TRUE	reported	textfile	16	57071555	NLRC5	1.0534e-28	13348	0.0444050746892437	exposure	TRUE	reported	cNHbmg	textfile	2	1	TRUE	0.00917198901831658	123.542495853719	162.966573354567
rs821470	G	A	G	A	0.435734077043571	0.0144113	0.354241046262543	0.326109	FALSE	FALSE	FALSE	XdQPXn	33777	0.0080416	0.0731172754457805	GABARAP	outcome	TRUE	reported	textfile	16	57058582	NLRC5	1e-200	14263	0.012379266195728	exposure	TRUE	reported	cNHbmg	textfile	2	1	TRUE	0.0799221132203718	1238.77475267343	162.966573354567

## Sheet: NLRC5 on BRSK2 (UKB-PPP)
SNP	effect_allele.exposure	other_allele.exposure	effect_allele.outcome	other_allele.outcome	beta.exposure	beta.outcome	eaf.exposure	eaf.outcome	remove	palindromic	ambiguous	id.outcome	samplesize.outcome	se.outcome	pval.outcome	gene.outcome	outcome	mr_keep.outcome	pval_origin.outcome	data_source.outcome	chr.exposure	pos.exposure	gene.exposure	pval.exposure	samplesize.exposure	se.exposure	exposure	mr_keep.exposure	pval_origin.exposure	id.exposure	data_source.exposure	action	SNP_index	mr_keep	R2	f	meanf
rs111843362	T	C	T	C	-0.291946	-0.00938685	0.0537249578345469	0.0515436	FALSE	FALSE	FALSE	S8365P	33874	0.0163463	0.565798771300837	BRSK2	outcome	TRUE	reported	textfile	16	57139069	NLRC5	1.6524e-26	13100	0.0274001297757536	exposure	TRUE	reported	lRFPlv	textfile	2	1	TRUE	0.00859171778440655	113.509561659769	162.966573354567
rs11648592	A	G	A	G	0.228187523693801	0.0509547	0.0228164543009567	0.0207833	FALSE	FALSE	FALSE	S8365P	33874	0.024999	0.0415231220594736	BRSK2	outcome	TRUE	reported	textfile	16	57083232	NLRC5	2.0515e-08	13544	0.040691095205571	exposure	TRUE	reported	lRFPlv	textfile	2	1	TRUE	0.00231649240464254	31.4427770979976	162.966573354567
rs142858325	G	T	G	T	-0.200407	0.0183106	0.0697144228461723	0.0568548	FALSE	FALSE	FALSE	S8365P	33874	0.015806	0.246676058239336	BRSK2	outcome	TRUE	reported	textfile	16	57043502	NLRC5	1.4422e-16	13100	0.0242593908885033	exposure	TRUE	reported	lRFPlv	textfile	2	1	TRUE	0.00518247690222937	68.2337020502292	162.966573354567
rs154045	A	G	A	G	-0.160195	-0.00483168	0.380078537985199	0.3981	FALSE	FALSE	FALSE	S8365P	33874	0.00719397	0.501820039172207	BRSK2	outcome	TRUE	reported	textfile	16	57114924	NLRC5	2.1875e-39	14258	0.0121997431566727	exposure	TRUE	reported	lRFPlv	textfile	2	1	TRUE	0.0119485866128996	172.398974836304	162.966573354567
rs17369468	T	A	T	A	0.168108709386232	0.0020403	0.311610963339887	0.302297	FALSE	TRUE	FALSE	S8365P	33874	0.00765762	0.789899792972426	BRSK2	outcome	TRUE	reported	textfile	16	57027765	NLRC5	1.3337e-38	13925	0.0129379081376251	exposure	TRUE	reported	lRFPlv	textfile	2	1	TRUE	0.0119790738049778	168.806793626338	162.966573354567
rs185887762	C	T	C	T	0.309850796298539	0.0369936	0.0236749116607774	0.0146116	FALSE	FALSE	FALSE	S8365P	33874	0.0307535	0.229011346370824	BRSK2	outcome	TRUE	reported	textfile	16	57547558	NLRC5	3.2366e-10	8906	0.0492835800764325	exposure	TRUE	reported	lRFPlv	textfile	2	1	TRUE	0.00441870262557819	39.5187497815676	162.966573354567
rs2113173	T	C	T	C	-0.107981	-0.0022218	0.236963835155593	0.225374	FALSE	FALSE	FALSE	S8365P	33874	0.0084553	0.792727638203655	BRSK2	outcome	TRUE	reported	textfile	16	57345733	NLRC5	8.9605e-15	14256	0.0139274806145809	exposure	TRUE	reported	lRFPlv	textfile	2	1	TRUE	0.00419880521037533	60.1021265909748	162.966573354567
rs4783965	A	G	A	G	-0.163213	-0.0105454	0.239134745023396	0.265101	FALSE	FALSE	FALSE	S8365P	33874	0.00821817	0.199427479325666	BRSK2	outcome	TRUE	reported	textfile	16	57045280	NLRC5	3.323e-31	13925	0.0140479251098678	exposure	TRUE	reported	lRFPlv	textfile	2	1	TRUE	0.00960064295225944	134.965507472421	162.966573354567
rs4784745	G	A	G	A	0.104016490492474	0.016664	0.333101582171446	0.342201	FALSE	FALSE	FALSE	S8365P	33874	0.00745086	0.0253180352387815	BRSK2	outcome	TRUE	reported	textfile	16	57014875	NLRC5	1.2318e-16	14263	0.0125620746470464	exposure	TRUE	reported	lRFPlv	textfile	2	1	TRUE	0.00478396656397897	68.5520981141729	162.966573354567
rs4784754	C	T	C	T	-0.381348	-0.000429541	0.207185538727498	0.204352	FALSE	FALSE	FALSE	S8365P	33874	0.00878353	0.960996486838432	BRSK2	outcome	TRUE	reported	textfile	16	57071963	NLRC5	3.2667e-150	14263	0.0146087837356195	exposure	TRUE	reported	lRFPlv	textfile	2	1	TRUE	0.0455968762913984	681.323265440368	162.966573354567
rs55744249	T	C	T	C	-0.252828	-0.01186	0.134480122324159	0.129697	FALSE	FALSE	FALSE	S8365P	33874	0.010551	0.260987675899312	BRSK2	outcome	TRUE	reported	textfile	16	57046423	NLRC5	4.6217e-48	14258	0.0173575380532611	exposure	TRUE	reported	lRFPlv	textfile	2	1	TRUE	0.0146622679366409	212.135681911866	162.966573354567
rs56208677	T	C	T	C	-0.176135	-0.0191206	0.0684235456228739	0.0684596	FALSE	FALSE	FALSE	S8365P	33874	0.0138953	0.168805658332762	BRSK2	outcome	TRUE	reported	textfile	16	57010232	NLRC5	1.5515e-11	11496	0.0261215886124786	exposure	TRUE	reported	lRFPlv	textfile	2	1	TRUE	0.0039394213569394	45.4587904064492	162.966573354567
rs66807230	T	C	T	C	-0.206963	0.0246862	0.0356928614277145	0.0470125	FALSE	FALSE	FALSE	S8365P	33874	0.0166535	0.138248045460353	BRSK2	outcome	TRUE	reported	textfile	16	57112289	NLRC5	5.8078e-09	11496	0.0355478427845407	exposure	TRUE	reported	lRFPlv	textfile	2	1	TRUE	0.00293990907773597	33.8909512547441	162.966573354567
rs7198642	G	T	G	T	-0.153832	0.00275356	0.192754331241309	0.205087	FALSE	FALSE	FALSE	S8365P	33874	0.00884323	0.755516580903794	BRSK2	outcome	TRUE	reported	textfile	16	57032461	NLRC5	1.1957e-24	14263	0.0150097903597577	exposure	TRUE	reported	lRFPlv	textfile	2	1	TRUE	0.00731052508077473	105.023172715125	162.966573354567
rs7199577	T	C	T	C	-0.158421	-0.00973975	0.354661339421613	0.360057	FALSE	FALSE	FALSE	S8365P	33874	0.00739941	0.188077134778735	BRSK2	outcome	TRUE	reported	textfile	16	57082766	NLRC5	1.6227e-37	14263	0.0123759570766902	exposure	TRUE	reported	lRFPlv	textfile	2	1	TRUE	0.0113578383729197	163.834943848273	162.966573354567
rs7200295	G	C	G	C	0.0754692909694874	-0.0160204	0.467323698893259	0.485193	FALSE	TRUE	TRUE	S8365P	33874	0.00719056	0.0258821291515309	BRSK2	outcome	TRUE	reported	textfile	16	57138074	NLRC5	2.0654e-10	14249	0.0118727744780127	exposure	TRUE	reported	lRFPlv	textfile	2	1	FALSE	0.00282762592208361	40.3994209618742	162.966573354567
rs72780022	T	G	T	G	0.151210249527407	0.0143572	0.0844558599695586	0.0923127	FALSE	FALSE	FALSE	S8365P	33874	0.0121158	0.236019561959662	BRSK2	outcome	TRUE	reported	textfile	16	57087095	NLRC5	1.2332e-12	14263	0.0212924199514767	exposure	TRUE	reported	lRFPlv	textfile	2	1	TRUE	0.00352345405449183	50.4256507346393	162.966573354567
rs73546834	G	A	G	A	-0.142755	-0.0263718	0.0613984784187789	0.0641431	FALSE	FALSE	FALSE	S8365P	33874	0.0145448	0.0698103796760701	BRSK2	outcome	TRUE	reported	textfile	16	57069507	NLRC5	7.1825e-09	14255	0.0246707277149154	exposure	TRUE	reported	lRFPlv	textfile	2	1	TRUE	0.00234331568351238	33.4777273205806	162.966573354567
rs76933585	G	T	G	T	0.360278507453921	0.0402022	0.014105419450631	0.0152253	FALSE	FALSE	FALSE	S8365P	33874	0.0317135	0.204915589608956	BRSK2	outcome	TRUE	reported	textfile	16	57046069	NLRC5	2.8242e-08	8539	0.0648893244936999	exposure	TRUE	reported	lRFPlv	textfile	2	1	TRUE	0.00359714672307406	30.8197045741984	162.966573354567
rs77294637	A	G	A	G	0.289476312418398	0.0035006	0.0452696656633857	0.0482435	FALSE	FALSE	FALSE	S8365P	33874	0.0166552	0.833526669380027	BRSK2	outcome	TRUE	reported	textfile	16	57069011	NLRC5	2.8646e-24	14263	0.0284797096128998	exposure	TRUE	reported	lRFPlv	textfile	2	1	TRUE	0.00719133674239345	103.298507636675	162.966573354567
rs77751805	A	G	A	G	0.240299637790216	0.0193325	0.0322917703254055	0.0339789	FALSE	FALSE	FALSE	S8365P	33874	0.0193147	0.316863343124893	BRSK2	outcome	TRUE	reported	textfile	16	56992420	NLRC5	1.019e-09	10333	0.039350806961356	exposure	TRUE	reported	lRFPlv	textfile	2	1	TRUE	0.00359590344469561	37.2833457987378	162.966573354567
rs78053218	C	G	C	G	0.41281226310613	0.0150514	0.0327544426494346	0.0252541	FALSE	TRUE	FALSE	S8365P	33874	0.0226837	0.506988373501586	BRSK2	outcome	TRUE	reported	textfile	16	57077131	NLRC5	2.3181e-35	14262	0.0332652894998372	exposure	TRUE	reported	lRFPlv	textfile	2	1	TRUE	0.0106826198045647	153.979058149166	162.966573354567
rs80162955	A	G	A	G	0.493597929230695	0.0265211	0.0193724480738505	0.0289275	FALSE	FALSE	FALSE	S8365P	33874	0.0212167	0.211295865916642	BRSK2	outcome	TRUE	reported	textfile	16	57071555	NLRC5	1.0534e-28	13348	0.0444050746892437	exposure	TRUE	reported	lRFPlv	textfile	2	1	TRUE	0.00917198901831658	123.542495853719	162.966573354567
rs821470	G	A	G	A	0.435734077043571	0.0119857	0.354241046262543	0.325958	FALSE	FALSE	FALSE	S8365P	33874	0.00749177	0.109632419816324	BRSK2	outcome	TRUE	reported	textfile	16	57058582	NLRC5	1e-200	14263	0.012379266195728	exposure	TRUE	reported	lRFPlv	textfile	2	1	TRUE	0.0799221132203718	1238.77475267343	162.966573354567

## Sheet: NLRC5 on TNFSF12 (UKB-PPP)
SNP	effect_allele.exposure	other_allele.exposure	effect_allele.outcome	other_allele.outcome	beta.exposure	beta.outcome	eaf.exposure	eaf.outcome	remove	palindromic	ambiguous	id.outcome	samplesize.outcome	se.outcome	pval.outcome	gene.outcome	outcome	mr_keep.outcome	pval_origin.outcome	data_source.outcome	chr.exposure	pos.exposure	gene.exposure	pval.exposure	samplesize.exposure	se.exposure	exposure	mr_keep.exposure	pval_origin.exposure	id.exposure	data_source.exposure	action	SNP_index	mr_keep	R2	f	meanf
rs111843362	T	C	T	C	-0.291946	-0.000934377	0.0537249578345469	0.051515	FALSE	FALSE	FALSE	8d25ga	34049	0.0166532	0.955255616860119	TNFSF12	outcome	TRUE	reported	textfile	16	57139069	NLRC5	1.6524e-26	13100	0.0274001297757536	exposure	TRUE	reported	8p8886	textfile	2	1	TRUE	0.00859171778440655	113.509561659769	162.966573354567
rs11648592	A	G	A	G	0.228187523693801	0.0214845	0.0228164543009567	0.0208257	FALSE	FALSE	FALSE	8d25ga	34049	0.0254372	0.398329985062811	TNFSF12	outcome	TRUE	reported	textfile	16	57083232	NLRC5	2.0515e-08	13544	0.040691095205571	exposure	TRUE	reported	8p8886	textfile	2	1	TRUE	0.00231649240464254	31.4427770979976	162.966573354567
rs142858325	G	T	G	T	-0.200407	-0.0171843	0.0697144228461723	0.0567463	FALSE	FALSE	FALSE	8d25ga	34049	0.0161184	0.286364382362651	TNFSF12	outcome	TRUE	reported	textfile	16	57043502	NLRC5	1.4422e-16	13100	0.0242593908885033	exposure	TRUE	reported	8p8886	textfile	2	1	TRUE	0.00518247690222937	68.2337020502292	162.966573354567
rs154045	A	G	A	G	-0.160195	0.00532456	0.380078537985199	0.397746	FALSE	FALSE	FALSE	8d25ga	34049	0.00733022	0.467602689048963	TNFSF12	outcome	TRUE	reported	textfile	16	57114924	NLRC5	2.1875e-39	14258	0.0121997431566727	exposure	TRUE	reported	8p8886	textfile	2	1	TRUE	0.0119485866128996	172.398974836304	162.966573354567
rs17369468	T	A	T	A	0.168108709386232	0.00253107	0.311610963339887	0.302021	FALSE	TRUE	FALSE	8d25ga	34049	0.00780367	0.745677433159279	TNFSF12	outcome	TRUE	reported	textfile	16	57027765	NLRC5	1.3337e-38	13925	0.0129379081376251	exposure	TRUE	reported	8p8886	textfile	2	1	TRUE	0.0119790738049778	168.806793626338	162.966573354567
rs185887762	C	T	C	T	0.309850796298539	-0.000842295	0.0236749116607774	0.0145483	FALSE	FALSE	FALSE	8d25ga	34049	0.0313871	0.978590803330813	TNFSF12	outcome	TRUE	reported	textfile	16	57547558	NLRC5	3.2366e-10	8906	0.0492835800764325	exposure	TRUE	reported	8p8886	textfile	2	1	TRUE	0.00441870262557819	39.5187497815676	162.966573354567
rs2113173	T	C	T	C	-0.107981	0.00651474	0.236963835155593	0.225492	FALSE	FALSE	FALSE	8d25ga	34049	0.00860462	0.448976903108596	TNFSF12	outcome	TRUE	reported	textfile	16	57345733	NLRC5	8.9605e-15	14256	0.0139274806145809	exposure	TRUE	reported	8p8886	textfile	2	1	TRUE	0.00419880521037533	60.1021265909748	162.966573354567
rs4783965	A	G	A	G	-0.163213	-0.00123302	0.239134745023396	0.265046	FALSE	FALSE	FALSE	8d25ga	34049	0.00836837	0.882861543844797	TNFSF12	outcome	TRUE	reported	textfile	16	57045280	NLRC5	3.323e-31	13925	0.0140479251098678	exposure	TRUE	reported	8p8886	textfile	2	1	TRUE	0.00960064295225944	134.965507472421	162.966573354567
rs4784745	G	A	G	A	0.104016490492474	0.0188935	0.333101582171446	0.342489	FALSE	FALSE	FALSE	8d25ga	34049	0.00758876	0.0127864504501047	TNFSF12	outcome	TRUE	reported	textfile	16	57014875	NLRC5	1.2318e-16	14263	0.0125620746470464	exposure	TRUE	reported	8p8886	textfile	2	1	TRUE	0.00478396656397897	68.5520981141729	162.966573354567
rs4784754	C	T	C	T	-0.381348	-0.00519303	0.207185538727498	0.204343	FALSE	FALSE	FALSE	8d25ga	34049	0.00894755	0.56165418597152	TNFSF12	outcome	TRUE	reported	textfile	16	57071963	NLRC5	3.2667e-150	14263	0.0146087837356195	exposure	TRUE	reported	8p8886	textfile	2	1	TRUE	0.0455968762913984	681.323265440368	162.966573354567
rs55744249	T	C	T	C	-0.252828	0.00334593	0.134480122324159	0.129901	FALSE	FALSE	FALSE	8d25ga	34049	0.0107405	0.755401773307404	TNFSF12	outcome	TRUE	reported	textfile	16	57046423	NLRC5	4.6217e-48	14258	0.0173575380532611	exposure	TRUE	reported	8p8886	textfile	2	1	TRUE	0.0146622679366409	212.135681911866	162.966573354567
rs56208677	T	C	T	C	-0.176135	-0.0355382	0.0684235456228739	0.0685776	FALSE	FALSE	FALSE	8d25ga	34049	0.0141436	0.0119822947912134	TNFSF12	outcome	TRUE	reported	textfile	16	57010232	NLRC5	1.5515e-11	11496	0.0261215886124786	exposure	TRUE	reported	8p8886	textfile	2	1	TRUE	0.0039394213569394	45.4587904064492	162.966573354567
rs66807230	T	C	T	C	-0.206963	0.0130567	0.0356928614277145	0.0469764	FALSE	FALSE	FALSE	8d25ga	34049	0.0169557	0.441273655108707	TNFSF12	outcome	TRUE	reported	textfile	16	57112289	NLRC5	5.8078e-09	11496	0.0355478427845407	exposure	TRUE	reported	8p8886	textfile	2	1	TRUE	0.00293990907773597	33.8909512547441	162.966573354567
rs7198642	G	T	G	T	-0.153832	-0.0179218	0.192754331241309	0.205236	FALSE	FALSE	FALSE	8d25ga	34049	0.00900694	0.046615462771064	TNFSF12	outcome	TRUE	reported	textfile	16	57032461	NLRC5	1.1957e-24	14263	0.0150097903597577	exposure	TRUE	reported	8p8886	textfile	2	1	TRUE	0.00731052508077473	105.023172715125	162.966573354567
rs7199577	T	C	T	C	-0.158421	0.00545745	0.354661339421613	0.35996	FALSE	FALSE	FALSE	8d25ga	34049	0.0075357	0.468935379561639	TNFSF12	outcome	TRUE	reported	textfile	16	57082766	NLRC5	1.6227e-37	14263	0.0123759570766902	exposure	TRUE	reported	8p8886	textfile	2	1	TRUE	0.0113578383729197	163.834943848273	162.966573354567
rs7200295	G	C	G	C	0.0754692909694874	-0.00949379	0.467323698893259	0.48554	FALSE	TRUE	TRUE	8d25ga	34049	0.00732643	0.195035199995727	TNFSF12	outcome	TRUE	reported	textfile	16	57138074	NLRC5	2.0654e-10	14249	0.0118727744780127	exposure	TRUE	reported	8p8886	textfile	2	1	FALSE	0.00282762592208361	40.3994209618742	162.966573354567
rs72780022	T	G	T	G	0.151210249527407	0.000936566	0.0844558599695586	0.0922641	FALSE	FALSE	FALSE	8d25ga	34049	0.0123432	0.939517123725832	TNFSF12	outcome	TRUE	reported	textfile	16	57087095	NLRC5	1.2332e-12	14263	0.0212924199514767	exposure	TRUE	reported	8p8886	textfile	2	1	TRUE	0.00352345405449183	50.4256507346393	162.966573354567
rs73546834	G	A	G	A	-0.142755	-0.00924864	0.0613984784187789	0.0642504	FALSE	FALSE	FALSE	8d25ga	34049	0.0147888	0.531721229132277	TNFSF12	outcome	TRUE	reported	textfile	16	57069507	NLRC5	7.1825e-09	14255	0.0246707277149154	exposure	TRUE	reported	8p8886	textfile	2	1	TRUE	0.00234331568351238	33.4777273205806	162.966573354567
rs76933585	G	T	G	T	0.360278507453921	-0.0322445	0.014105419450631	0.015252	FALSE	FALSE	FALSE	8d25ga	34049	0.0322597	0.317538215640668	TNFSF12	outcome	TRUE	reported	textfile	16	57046069	NLRC5	2.8242e-08	8539	0.0648893244936999	exposure	TRUE	reported	8p8886	textfile	2	1	TRUE	0.00359714672307406	30.8197045741984	162.966573354567
rs77294637	A	G	A	G	0.289476312418398	-0.000224138	0.0452696656633857	0.0481669	FALSE	FALSE	FALSE	8d25ga	34049	0.0169726	0.989463526681928	TNFSF12	outcome	TRUE	reported	textfile	16	57069011	NLRC5	2.8646e-24	14263	0.0284797096128998	exposure	TRUE	reported	8p8886	textfile	2	1	TRUE	0.00719133674239345	103.298507636675	162.966573354567
rs77751805	A	G	A	G	0.240299637790216	0.0367918	0.0322917703254055	0.0341273	FALSE	FALSE	FALSE	8d25ga	34049	0.0196508	0.0611673970933411	TNFSF12	outcome	TRUE	reported	textfile	16	56992420	NLRC5	1.019e-09	10333	0.039350806961356	exposure	TRUE	reported	8p8886	textfile	2	1	TRUE	0.00359590344469561	37.2833457987378	162.966573354567
rs78053218	C	G	C	G	0.41281226310613	-0.0024572	0.0327544426494346	0.0252689	FALSE	TRUE	FALSE	8d25ga	34049	0.023091	0.915254135749426	TNFSF12	outcome	TRUE	reported	textfile	16	57077131	NLRC5	2.3181e-35	14262	0.0332652894998372	exposure	TRUE	reported	8p8886	textfile	2	1	TRUE	0.0106826198045647	153.979058149166	162.966573354567
rs80162955	A	G	A	G	0.493597929230695	0.0441077	0.0193724480738505	0.0289256	FALSE	FALSE	FALSE	8d25ga	34049	0.0216064	0.0412088030310531	TNFSF12	outcome	TRUE	reported	textfile	16	57071555	NLRC5	1.0534e-28	13348	0.0444050746892437	exposure	TRUE	reported	8p8886	textfile	2	1	TRUE	0.00917198901831658	123.542495853719	162.966573354567
rs821470	G	A	G	A	0.435734077043571	0.0148899	0.354241046262543	0.325957	FALSE	FALSE	FALSE	8d25ga	34049	0.00763104	0.0510293457200494	TNFSF12	outcome	TRUE	reported	textfile	16	57058582	NLRC5	1e-200	14263	0.012379266195728	exposure	TRUE	reported	8p8886	textfile	2	1	TRUE	0.0799221132203718	1238.77475267343	162.966573354567

## Sheet: NLRC5 on BCL2 (UKB-PPP)
SNP	effect_allele.exposure	other_allele.exposure	effect_allele.outcome	other_allele.outcome	beta.exposure	beta.outcome	eaf.exposure	eaf.outcome	remove	palindromic	ambiguous	id.outcome	samplesize.outcome	se.outcome	pval.outcome	gene.outcome	outcome	mr_keep.outcome	pval_origin.outcome	data_source.outcome	chr.exposure	pos.exposure	gene.exposure	pval.exposure	samplesize.exposure	se.exposure	exposure	mr_keep.exposure	pval_origin.exposure	id.exposure	data_source.exposure	action	SNP_index	mr_keep	R2	f	meanf
rs111843362	T	C	T	C	-0.291946	0.00582326	0.0537249578345469	0.0514866	FALSE	FALSE	FALSE	gvn8D1	33796	0.0174286	0.738288	BCL2	outcome	TRUE	reported	textfile	16	57139069	NLRC5	1.6524e-26	13100	0.0274001	exposure	TRUE	reported	4PlQ22	textfile	2	1	TRUE	0.00859172	113.51	162.967
rs11648592	A	G	A	G	0.228187523693801	-0.0218668	0.0228164543009567	0.0207814	FALSE	FALSE	FALSE	gvn8D1	33796	0.0266421	0.411783	BCL2	outcome	TRUE	reported	textfile	16	57083232	NLRC5	2.0515e-08	13544	0.0406911	exposure	TRUE	reported	4PlQ22	textfile	2	1	TRUE	0.00231649	31.4428	162.967
rs142858325	G	T	G	T	-0.200407	-0.0160679	0.0697144228461723	0.056762	FALSE	FALSE	FALSE	gvn8D1	33796	0.0168549	0.340433	BCL2	outcome	TRUE	reported	textfile	16	57043502	NLRC5	1.4422e-16	13100	0.0242594	exposure	TRUE	reported	4PlQ22	textfile	2	1	TRUE	0.00518248	68.2337	162.967
rs154045	A	G	A	G	-0.160195	0.00131191	0.380078537985199	0.397691	FALSE	FALSE	FALSE	gvn8D1	33796	0.00766626	0.864123	BCL2	outcome	TRUE	reported	textfile	16	57114924	NLRC5	2.1875e-39	14258	0.0121997	exposure	TRUE	reported	4PlQ22	textfile	2	1	TRUE	0.0119486	172.399	162.967
rs17369468	T	A	T	A	0.168108709386232	0.00363813	0.311610963339887	0.302136	FALSE	TRUE	FALSE	gvn8D1	33796	0.00816787	0.656017	BCL2	outcome	TRUE	reported	textfile	16	57027765	NLRC5	1.3337e-38	13925	0.0129379	exposure	TRUE	reported	4PlQ22	textfile	2	1	TRUE	0.0119791	168.807	162.967
rs185887762	C	T	C	T	0.309850796298539	0.0374217	0.0236749116607774	0.0145449	FALSE	FALSE	FALSE	gvn8D1	33796	0.0328465	0.254582	BCL2	outcome	TRUE	reported	textfile	16	57547558	NLRC5	3.2366e-10	8906	0.0492836	exposure	TRUE	reported	4PlQ22	textfile	2	1	TRUE	0.0044187	39.5187	162.967
rs2113173	T	C	T	C	-0.107981	-0.000396009	0.236963835155593	0.225219	FALSE	FALSE	FALSE	gvn8D1	33796	0.00900717	0.964932	BCL2	outcome	TRUE	reported	textfile	16	57345733	NLRC5	8.9605e-15	14256	0.0139275	exposure	TRUE	reported	4PlQ22	textfile	2	1	TRUE	0.00419881	60.1021	162.967
rs4783965	A	G	A	G	-0.163213	-0.000215123	0.239134745023396	0.264935	FALSE	FALSE	FALSE	gvn8D1	33796	0.00875866	0.980405	BCL2	outcome	TRUE	reported	textfile	16	57045280	NLRC5	3.323e-31	13925	0.0140479	exposure	TRUE	reported	4PlQ22	textfile	2	1	TRUE	0.00960064	134.966	162.967
rs4784745	G	A	G	A	0.104016490492474	0.00774056	0.333101582171446	0.342199	FALSE	FALSE	FALSE	gvn8D1	33796	0.00793968	0.329599	BCL2	outcome	TRUE	reported	textfile	16	57014875	NLRC5	1.2318e-16	14263	0.0125621	exposure	TRUE	reported	4PlQ22	textfile	2	1	TRUE	0.00478397	68.5521	162.967
rs4784754	C	T	C	T	-0.381348	-0.000474727	0.207185538727498	0.204048	FALSE	FALSE	FALSE	gvn8D1	33796	0.00936578	0.959575	BCL2	outcome	TRUE	reported	textfile	16	57071963	NLRC5	3.2667e-150	14263	0.0146088	exposure	TRUE	reported	4PlQ22	textfile	2	1	TRUE	0.0455969	681.323	162.967
rs55744249	T	C	T	C	-0.252828	-0.0144148	0.134480122324159	0.129821	FALSE	FALSE	FALSE	gvn8D1	33796	0.0112396	0.199665	BCL2	outcome	TRUE	reported	textfile	16	57046423	NLRC5	4.6217e-48	14258	0.0173575	exposure	TRUE	reported	4PlQ22	textfile	2	1	TRUE	0.0146623	212.136	162.967
rs56208677	T	C	T	C	-0.176135	0.00534803	0.0684235456228739	0.0683217	FALSE	FALSE	FALSE	gvn8D1	33796	0.0148231	0.718256	BCL2	outcome	TRUE	reported	textfile	16	57010232	NLRC5	1.5515e-11	11496	0.0261216	exposure	TRUE	reported	4PlQ22	textfile	2	1	TRUE	0.00393942	45.4588	162.967
rs66807230	T	C	T	C	-0.206963	0.0180768	0.0356928614277145	0.0467807	FALSE	FALSE	FALSE	gvn8D1	33796	0.0177888	0.309539	BCL2	outcome	TRUE	reported	textfile	16	57112289	NLRC5	5.8078e-09	11496	0.0355478	exposure	TRUE	reported	4PlQ22	textfile	2	1	TRUE	0.00293991	33.891	162.967
rs7198642	G	T	G	T	-0.153832	0.00169126	0.192754331241309	0.204877	FALSE	FALSE	FALSE	gvn8D1	33796	0.00942981	0.857661	BCL2	outcome	TRUE	reported	textfile	16	57032461	NLRC5	1.1957e-24	14263	0.0150098	exposure	TRUE	reported	4PlQ22	textfile	2	1	TRUE	0.00731053	105.023	162.967
rs7199577	T	C	T	C	-0.158421	0.00470153	0.354661339421613	0.360218	FALSE	FALSE	FALSE	gvn8D1	33796	0.00788569	0.551035	BCL2	outcome	TRUE	reported	textfile	16	57082766	NLRC5	1.6227e-37	14263	0.012376	exposure	TRUE	reported	4PlQ22	textfile	2	1	TRUE	0.0113578	163.835	162.967
rs7200295	G	C	G	C	0.0754692909694874	-0.00250532	0.467323698893259	0.485676	FALSE	TRUE	TRUE	gvn8D1	33796	0.00766999	0.74394	BCL2	outcome	TRUE	reported	textfile	16	57138074	NLRC5	2.0654e-10	14249	0.0118728	exposure	TRUE	reported	4PlQ22	textfile	2	1	FALSE	0.00282763	40.3994	162.967
rs72780022	T	G	T	G	0.151210249527407	0.00478273	0.0844558599695586	0.0921559	FALSE	FALSE	FALSE	gvn8D1	33796	0.0129305	0.711472	BCL2	outcome	TRUE	reported	textfile	16	57087095	NLRC5	1.2332e-12	14263	0.0212924	exposure	TRUE	reported	4PlQ22	textfile	2	1	TRUE	0.00352345	50.4257	162.967
rs73546834	G	A	G	A	-0.142755	-0.00814541	0.0613984784187789	0.0640593	FALSE	FALSE	FALSE	gvn8D1	33796	0.0154994	0.599214	BCL2	outcome	TRUE	reported	textfile	16	57069507	NLRC5	7.1825e-09	14255	0.0246707	exposure	TRUE	reported	4PlQ22	textfile	2	1	TRUE	0.00234332	33.4777	162.967
rs76933585	G	T	G	T	0.360278507453921	-0.0103177	0.014105419450631	0.0152537	FALSE	FALSE	FALSE	gvn8D1	33796	0.0337482	0.759813	BCL2	outcome	TRUE	reported	textfile	16	57046069	NLRC5	2.8242e-08	8539	0.0648893	exposure	TRUE	reported	4PlQ22	textfile	2	1	TRUE	0.00359715	30.8197	162.967
rs77294637	A	G	A	G	0.289476312418398	0.0173614	0.0452696656633857	0.0482129	FALSE	FALSE	FALSE	gvn8D1	33796	0.0177482	0.327972	BCL2	outcome	TRUE	reported	textfile	16	57069011	NLRC5	2.8646e-24	14263	0.0284797	exposure	TRUE	reported	4PlQ22	textfile	2	1	TRUE	0.00719134	103.299	162.967
rs77751805	A	G	A	G	0.240299637790216	0.0274889	0.0322917703254055	0.0339981	FALSE	FALSE	FALSE	gvn8D1	33796	0.0205751	0.18154	BCL2	outcome	TRUE	reported	textfile	16	56992420	NLRC5	1.019e-09	10333	0.0393508	exposure	TRUE	reported	4PlQ22	textfile	2	1	TRUE	0.0035959	37.2833	162.967
rs78053218	C	G	C	G	0.41281226310613	0.0293161	0.0327544426494346	0.0252134	FALSE	TRUE	FALSE	gvn8D1	33796	0.0241858	0.225466	BCL2	outcome	TRUE	reported	textfile	16	57077131	NLRC5	2.3181e-35	14262	0.0332653	exposure	TRUE	reported	4PlQ22	textfile	2	1	TRUE	0.0106826	153.979	162.967
rs80162955	A	G	A	G	0.493597929230695	0.0480549	0.0193724480738505	0.0288799	FALSE	FALSE	FALSE	gvn8D1	33796	0.022624	0.0336643	BCL2	outcome	TRUE	reported	textfile	16	57071555	NLRC5	1.0534e-28	13348	0.0444051	exposure	TRUE	reported	4PlQ22	textfile	2	1	TRUE	0.00917199	123.542	162.967
rs821470	G	A	G	A	0.435734077043571	0.0118885	0.354241046262543	0.326104	FALSE	FALSE	FALSE	gvn8D1	33796	0.00798085	0.136322	BCL2	outcome	TRUE	reported	textfile	16	57058582	NLRC5	1e-200	14263	0.0123793	exposure	TRUE	reported	4PlQ22	textfile	2	1	TRUE	0.0799221	1238.77	162.967
