# Supplementary material for: NLRC5-Mediated Epigenetic and Proteomic Regulation of Microglial Panoptosis Drives Neuroinflammation in Multiple Sclerosis
Source: Research Square preprint supplement (doi:10.21203/rs.3.rs-6759227/v1), 2025-06-26
Supplement: Supplementary file 7 [file 62dcc3acc2c1593c056e305f.xlsx]

## Sheet: Sheet1
id	nsnp	method	b	se	or	or_lci95	or_uci95	pvalue	FDR
FTL	21	Inverse variance weighted	-0.0587994	0.0112039	0.942896	0.922416	0.963831	1.53658e-07	6.14631e-05
RHOD	21	Inverse variance weighted	0.0497756587062179	0.010641486714191	1.05103527931089	1.0293405399806	1.07318726451494	2.9037965889636e-06	0.000458382258375604
UST	21	Inverse variance weighted	0.0519560439217577	0.0111907682546648	1.05332944126443	1.03047734655546	1.0766883091056	3.43786693781703e-06	0.000458382258375604
GRAP	21	Inverse variance weighted	0.0492620284831744	0.0109379445757914	1.05049557444218	1.0282143501481	1.07325962895155	6.67572542903401e-06	0.000667572542903401
SYT5	21	Inverse variance weighted	0.0502249340358007	0.0113668363096434	1.05150758962315	1.02834008557692	1.07519703504972	9.93653160110244e-06	0.000794922528088195
PCDH9	21	Inverse variance weighted	0.049795436516571	0.0114196226893086	1.05105606669288	1.02779216867642	1.07484653901825	1.29756660976312e-05	0.000865044406508747
HSF2BP	21	Inverse variance weighted	0.0455891939917334	0.0106171806920689	1.04664435483868	1.02508908379699	1.06865288376501	1.75555476977188e-05	0.00100317415415536
C2orf66	21	Inverse variance weighted	0.045960042991721	0.0108336240781913	1.04703257383188	1.02503436596439	1.06950288406534	2.21189749353512e-05	0.00102284575174146
FKBP14	21	Inverse variance weighted	0.0459765903054904	0.0108603299435171	1.04704989955175	1.02499767430411	1.06957656552308	2.30140294141829e-05	0.00102284575174146
RNF150	21	Inverse variance weighted	0.0440544027832534	0.0106083361243074	1.04503920638343	1.02353473598955	1.06699548581774	3.28417619784737e-05	0.00123844018465138
LCT	21	Inverse variance weighted	-0.0421003	0.0101581475119839	0.958773573187957	0.939873198239275	0.97805402512348	3.4057105077913e-05	0.00123844018465138
SRP19	21	Inverse variance weighted	0.0429164421121642	0.0106321624459143	1.04385066924933	1.02232291300262	1.06583175025589	5.42606481325717e-05	0.00139992454962711
CLEC4G	21	Inverse variance weighted	0.0497420625305345	0.0123801678101498	1.05099996913814	1.02580424440975	1.07681454931391	5.87234055324805e-05	0.00139992454962711
SNAP29	21	Inverse variance weighted	0.0430118128939223	0.0107514842709539	1.04395022685106	1.02218133108872	1.06618272413722	6.31963639213677e-05	0.00139992454962711
RPS6KA1	21	Inverse variance weighted	0.0387993056585576	0.00970914635606445	1.03956182853634	1.01996608709836	1.05953404629776	6.43781374861951e-05	0.00139992454962711
PIAS4	21	Inverse variance weighted	0.0427385592870306	0.0107322925138712	1.04366500265721	1.02194049494264	1.06585133201186	6.82689303683515e-05	0.00139992454962711
CAMK1	21	Inverse variance weighted	0.0430946058111238	0.0108299194094698	1.04403666211382	1.02210882016381	1.06643493367279	6.91424386036287e-05	0.00139992454962711
EGFLAM	21	Inverse variance weighted	0.045776388793184	0.0115752822166104	1.04684029956022	1.02335744613179	1.07086201104575	7.66412623071859e-05	0.00139992454962711
B2M	21	Inverse variance weighted	0.0707595256592983	0.0179638494843526	1.07332308816987	1.03618985075195	1.11178704439394	8.18234006107275e-05	0.00139992454962711
PTK2B	21	Inverse variance weighted	0.0433249316968184	0.0110337694332313	1.04427715847793	1.02193587337828	1.0671068626975	8.61637579161909e-05	0.00139992454962711
SHMT1	21	Inverse variance weighted	0.041539968473201	0.0106343267697807	1.04241482474785	1.02091234970966	1.06437018531819	9.37530386279207e-05	0.00139992454962711
TMPRSS5	21	Inverse variance weighted	0.0474712621027788	0.0121658169990068	1.04861606566755	1.02390757195904	1.07392081403622	9.53932457578456e-05	0.00139992454962711
CDHR3	21	Inverse variance weighted	0.0415430948753374	0.010654471409075	1.04241808376088	1.02087523298131	1.06441553898644	9.65417131070771e-05	0.00139992454962711
CSF2RA	21	Inverse variance weighted	0.0442620637720575	0.0113735462817414	1.04525624279258	1.02221302874555	1.06881890797033	9.95575006233271e-05	0.00139992454962711
EXOSC3	21	Inverse variance weighted	0.0413294935175516	0.0106224959393298	1.04219544562156	1.02072116448409	1.06412151003386	9.99341785808866e-05	0.00139992454962711
CAMK4	21	Inverse variance weighted	0.0435970297087421	0.0112195108429393	1.0445613428779	1.02184190543111	1.06778591995064	0.00010198392850537	0.00139992454962711
LILRA2	21	Inverse variance weighted	0.0435031769756939	0.0112820868456047	1.04446331254131	1.02162069886988	1.06781666860463	0.000115280457750866	0.00139992454962711
PGM1	21	Inverse variance weighted	0.0413989529224175	0.0107639239045491	1.04226783841112	1.02050914249813	1.06449046044503	0.000120020748784028	0.00139992454962711
PDIA5	21	Inverse variance weighted	0.0419262434223551	0.0109359550085547	1.04281756125979	1.02070316946038	1.06541107993886	0.000126179726232412	0.00139992454962711
ZFAND5	21	Inverse variance weighted	0.0421121745337587	0.0109848176792759	1.04301147151436	1.02079520048937	1.06571125059073	0.000126245082092606	0.00139992454962711
PLVAP	21	Inverse variance weighted	0.0431772732026504	0.0112641164396271	1.04412297346886	1.02132377550658	1.06743112210886	0.000126502466814621	0.00139992454962711
DEFA1	21	Inverse variance weighted	0.0416790284578994	0.0108806599712469	1.04255979301684	1.02056146824639	1.06503229431439	0.000127851588875181	0.00139992454962711
CCL5	21	Inverse variance weighted	0.0425379370487968	0.0111223794547363	1.04345564125039	1.02095460136117	1.06645258643786	0.000131018772870371	0.00139992454962711
BTLA	21	Inverse variance weighted	0.0413876653056676	0.0108233462932155	1.04225607375761	1.02037877517162	1.06460242972216	0.000131343842419545	0.00139992454962711
HTATIP2	21	Inverse variance weighted	0.0419561198133098	0.0109840839107161	1.04284871735035	1.02063738087455	1.06554342184431	0.00013360350577832	0.00139992454962711
ITM2B	21	Inverse variance weighted	0.0753923767340423	0.0197411203444093	1.07830717053354	1.03738153229057	1.12084736216256	0.000133965203995868	0.00139992454962711
SEMA4D	21	Inverse variance weighted	0.0413065940216826	0.0108462050938346	1.04217158014452	1.02025034355291	1.06456381938439	0.000139873761714289	0.00139992454962711
LAT	21	Inverse variance weighted	0.0399391083547316	0.0105023040411335	1.04074739944145	1.01954310680037	1.06239269553144	0.000143017795256828	0.00139992454962711
ASPRV1	21	Inverse variance weighted	0.0416106225333907	0.0109596847755284	1.04248847818955	1.02033360788282	1.06512440515708	0.000146635748694999	0.00139992454962711
CASC4	21	Inverse variance weighted	0.0417296440964832	0.0109963423760221	1.04261256418204	1.02038174087471	1.06532772534561	0.000147723310705118	0.00139992454962711
EPDR1	21	Inverse variance weighted	0.0412219325241295	0.0109151079642782	1.04208335207265	1.02002620782701	1.0646174621144	0.000158987499313273	0.00139992454962711
CETN2	21	Inverse variance weighted	0.0442371412936742	0.0117138958675504	1.04523019274108	1.02150589419227	1.06950548403975	0.00015906861751358	0.00139992454962711
RAB3A	21	Inverse variance weighted	0.0407017337731344	0.0107839007039665	1.04154140258741	1.01975794304503	1.06379018736984	0.000160454153671696	0.00139992454962711
REPIN1	21	Inverse variance weighted	0.0404781302113624	0.0107307644423329	1.0413085362559	1.01963613361716	1.06344158659106	0.000161842242081054	0.00139992454962711
DSCAML1	21	Inverse variance weighted	0.0401950293745038	0.0106586490763517	1.04101378266232	1.01949160562701	1.0629903078274	0.000162517430317931	0.00139992454962711
TTC17	21	Inverse variance weighted	0.0410347962754208	0.0108845434572143	1.04188835874903	1.01989643833688	1.06435448864484	0.000163243494547203	0.00139992454962711
FGF2	21	Inverse variance weighted	-0.0400563	0.0106303569184351	0.96073534130931	0.940925035994289	0.980962734257949	0.000164491134581185	0.00139992454962711
RNF34	21	Inverse variance weighted	0.0413964787780555	0.011057871509048	1.04226525969321	1.01991883502009	1.06510129459661	0.000181387270104858	0.00146498199587969
CLSTN1	21	Inverse variance weighted	0.0413733308387293	0.0110630868772117	1.04224113367946	1.01988480083429	1.0650875273804	0.000184193318699094	0.00146498199587969
CBS	21	Inverse variance weighted	0.0438998288182163	0.0117391730114858	1.04487768301365	1.02111079526549	1.06919775750301	0.000184312226423446	0.00146498199587969
C1QTNF9	21	Inverse variance weighted	0.0402154529282649	0.010763588171593	1.04103504408039	1.01930275508979	1.06323068155349	0.00018678520447466	0.00146498199587969
RRAS	21	Inverse variance weighted	0.0468188694573546	0.0125649396646688	1.04793217936389	1.02243965258324	1.07406031228523	0.000194425530449715	0.0014694502023306
FCRL1	21	Inverse variance weighted	0.0411392471047905	0.011041742594755	1.04199719053589	1.01968874790816	1.0647936905375	0.000194702151808805	0.0014694502023306
DLL3	21	Inverse variance weighted	0.0421189613096385	0.0113490050166815	1.04301855022348	1.02007373252919	1.06647947243279	0.000206240700983803	0.00151710218834387
BTN3A3	21	Inverse variance weighted	0.0662937102234312	0.0179104755927464	1.06854051235394	1.03168065677351	1.10671729574967	0.00021441901563778	0.00151710218834387
ARSB	21	Inverse variance weighted	0.0393035413279278	0.0106272362907406	1.04008614486919	1.01864586118487	1.06197769997372	0.000216981240526807	0.00151710218834387
SPINT3	21	Inverse variance weighted	0.039164154508295	0.0105938087832911	1.0399411806726	1.0185706177096	1.0617601180079	0.000218256145676029	0.00151710218834387
AMIGO1	21	Inverse variance weighted	0.039265833976583	0.0106339221961037	1.04004692671491	1.01859410334559	1.06195157248238	0.000222054076569284	0.00151710218834387
XCL2	21	Inverse variance weighted	0.0396491408490766	0.0107477644892232	1.04044566026341	1.01875727071966	1.0625957753374	0.00022508473130001	0.00151710218834387
ASCC1	21	Inverse variance weighted	0.0400743169328495	0.0108712389303781	1.04088812693108	1.01894388968699	1.0633049609031	0.00022756532825158	0.00151710218834387
ADAM10	21	Inverse variance weighted	0.0387113358823876	0.0105350262239857	1.03947038253727	1.01822680141036	1.06115717507688	0.000238281802559307	0.00156250362333972
UBE2D3	21	Inverse variance weighted	0.045244661298235	0.0123424717237631	1.04628381375264	1.02127660342655	1.07190335629724	0.000246595581957382	0.00157444901165139
TXN	21	Inverse variance weighted	0.039158110586701	0.0106862611772574	1.03993489536864	1.01837990759212	1.06194611514127	0.000247975719335094	0.00157444901165139
FCGR3A	21	Inverse variance weighted	0.0337150534540797	0.00921758731562719	1.03428984741529	1.01577166255201	1.05314563095676	0.000254501121955102	0.00159063201221939
SLC5A8	21	Inverse variance weighted	0.065770726576955	0.0180680475023958	1.06798182924418	1.03082283626237	1.10648032568949	0.000272460315233881	0.00167116054337739
CD69	21	Inverse variance weighted	0.0394587018036667	0.0108489923124744	1.04024753765081	1.0183612084674	1.06260424159038	0.00027574148965727	0.00167116054337739
CRIP1	21	Inverse variance weighted	0.0485493038748768	0.0134145399568445	1.04974712714545	1.02250633606833	1.07771364545999	0.000295566186908349	0.00174043087681049
CD63	21	Inverse variance weighted	0.0384755039708613	0.0106389961183162	1.03922527115366	1.01777927414543	1.06112316455963	0.000298659436425478	0.00174043087681049
CARD17	21	Inverse variance weighted	0.0390535087130772	0.0108129492253675	1.03982612191919	1.01802057409278	1.06209873487974	0.00030415512144888	0.00174043087681049
RRAS2	21	Inverse variance weighted	0.0403945005777567	0.0111874055667792	1.04122145564585	1.01863875866958	1.06430479939055	0.000305357478368511	0.00174043087681049
SELL	21	Inverse variance weighted	0.0398052986000616	0.0110334360526794	1.04060814660416	1.01834602182674	1.06335694505535	0.000308926480633862	0.00174043087681049
NAIF1	21	Inverse variance weighted	0.0388996165081007	0.0108266719426794	1.03966611309686	1.01783654408093	1.06196386149405	0.000326963975404519	0.00180089369138399
TGIF2	21	Inverse variance weighted	0.0382776726477609	0.0106575758300777	1.03901970017813	1.01754088975729	1.06095189709354	0.000328663098677578	0.00180089369138399
CSF1R	21	Inverse variance weighted	0.0402950903121639	0.0112318619913238	1.04111795268912	1.01844875456999	1.06429173441254	0.000333774234348117	0.00180418505053036
ADM	21	Inverse variance weighted	0.0415830473624857	0.0116130701580102	1.04245973178794	1.01899966944888	1.06645990669176	0.000342660578015241	0.00182752308274795
CASP10	21	Inverse variance weighted	0.0410867265722714	0.011507180833602	1.04194246572566	1.0187054475378	1.06570952821197	0.000356260569672136	0.00187505562985335
ENPP2	21	Inverse variance weighted	0.0397158876157413	0.0111516394777833	1.04051510896484	1.01801909390002	1.06350823719465	0.00036882731734263	0.00188761494743158
AP1G2	21	Inverse variance weighted	0.0389656113162095	0.010949768573125	1.03973472792658	1.01765815883412	1.06229021511022	0.000372867316096962	0.00188761494743158
SLC41A2	21	Inverse variance weighted	0.0382864467752327	0.0107678294061287	1.03902881670942	1.01732995211475	1.06119050137905	0.00037707050623029	0.00188761494743158
GLP1R	21	Inverse variance weighted	0.0385358726206176	0.0108389400235455	1.03928800967377	1.01744191445507	1.06160317528316	0.000377522989486317	0.00188761494743158
NAALAD2	21	Inverse variance weighted	0.038778090733183	0.0109451192607488	1.03953977454366	1.01747661674252	1.06208135408359	0.000395666686741323	0.00193514141308802
CELA3B	21	Inverse variance weighted	0.0377783122358588	0.0106650103443469	1.03850098439652	1.01701807722838	1.06043768418715	0.000396703989683044	0.00193514141308802
LRP2	21	Inverse variance weighted	0.0380872461503889	0.0107687489332055	1.03882186213332	1.01712548639603	1.06098104479703	0.000404958549110964	0.00194437790549622
IMPA2	21	Inverse variance weighted	0.0374496031350181	0.0105995558570884	1.03815967577041	1.01681426861253	1.05995317499466	0.000410671308503025	0.00194437790549622
CCL3	21	Inverse variance weighted	0.0391797022503699	0.0110942920467947	1.03995734953555	1.01758776469022	1.06281868393163	0.000413180304917946	0.00194437790549622
KLK14	21	Inverse variance weighted	0.0407205810508687	0.0115575712196217	1.04156103299248	1.01823195057293	1.06542461650114	0.000426237802967429	0.00196751838375517
LRCH4	21	Inverse variance weighted	0.0379174557932773	0.0107785906099924	1.03864549517151	1.01693318644531	1.06082137845354	0.000435059604475301	0.00196751838375517
CKAP2	21	Inverse variance weighted	0.0391387723653743	0.0111322422265679	1.03991478507191	1.0174704311335	1.06285423843366	0.000438425907173815	0.00196751838375517
GIP	21	Inverse variance weighted	0.0375028585097253	0.0106729850556365	1.03821496482516	1.01672208245719	1.06016219356807	0.000441726017428914	0.00196751838375517
MPG	21	Inverse variance weighted	0.0381415638603764	0.0108617709788221	1.03887829009047	1.01699529707282	1.06123214603618	0.000445515233112298	0.00196751838375517
INHBC	21	Inverse variance weighted	0.0302743610963044	0.00863111378035289	1.03073728937591	1.01344698639433	1.04832258023669	0.000452194680924448	0.00196751838375517
FERMT3	21	Inverse variance weighted	0.0383857810350929	0.0109442650133409	1.03913203299427	1.01707923200597	1.06166299341807	0.00045252922826369	0.00196751838375517
PHEX	21	Inverse variance weighted	0.03860447210483	0.0110233438707686	1.03935930674063	1.01714401846592	1.06205979575797	0.00046166613306651	0.00196834371436828
ARL11	21	Inverse variance weighted	0.0380984224147952	0.0108804461475193	1.03883347234601	1.01691	1.06122520760112	0.000462560772876546	0.00196834371436828
PSG11	21	Inverse variance weighted	0.0376589504107667	0.0107848146805528	1.03837703442125	1.01665793525126	1.06056012374211	0.00047968833604972	0.00201974036231461
PPP1R3B	21	Inverse variance weighted	0.0371404219364547	0.0106713498017814	1.03783874593285	1.01635690947786	1.0597746249522	0.000500690890750993	0.0020862120447958
GHDC	21	Inverse variance weighted	0.0369775446176373	0.0106386212754642	1.03766971930622	1.01625657011595	1.05953405668236	0.000509363248278203	0.00209144101373568
TREML2	21	Inverse variance weighted	0.0389119716372565	0.0112018558580092	1.03967895838532	1.01710090878551	1.06275820537797	0.000513320126225629	0.00209144101373568
SORCS2	21	Inverse variance weighted	0.0379799626532725	0.0109406230968988	1.03871041966915	1.01667382344787	1.06122466325562	0.00051763165089958	0.00209144101373568
JUP	21	Inverse variance weighted	0.0361997075079018	0.0104536517095794	1.03686289512047	1.0158346096799	1.05832647660663	0.000534433128583022	0.00211933026161483
PLOD3	21	Inverse variance weighted	0.0381753182045744	0.0110252809611643	1.03891335733768	1.0167037406716	1.0616081370387	0.000535130891057745	0.00211933026161483
PCDHGC3	21	Inverse variance weighted	0.0389901007841138	0.0112784889627862	1.03976019078861	1.01702760719629	1.06300089269859	0.000546159355786063	0.0021269461713207
ATAD1	21	Inverse variance weighted	0.0377782994959922	0.0109303393402136	1.03850097116615	1.01648930678415	1.06098928922826	0.000547688639115081	0.0021269461713207
IGF2R	21	Inverse variance weighted	0.0394655445722715	0.0114286666693804	1.04025465584835	1.01721180298029	1.06381949741803	0.00055396502291061	0.00212822850554539
KCNIP3	21	Inverse variance weighted	0.0389649159876624	0.0112911372797549	1.03973400496959	1.01697678200546	1.06300047377514	0.000558659982705664	0.00212822850554539
TNFRSF12A	21	Inverse variance weighted	0.0486879705903752	0.0141231433548442	1.04989270222466	1.0212288015443	1.07936114269175	0.000566032716978875	0.00213597251690142
BPIFB1	21	Inverse variance weighted	-0.0500398	0.0145964758970195	0.951191598484566	0.924364449771574	0.97879733177883	0.000607578106512753	0.00227132002434674
MDGA1	21	Inverse variance weighted	0.0344937253153615	0.0100725891737085	1.03509553345769	1.01486079015912	1.05573372601781	0.000615899508777572	0.00228110929176879
MEOX2	21	Inverse variance weighted	0.0387565511746903	0.0113315960042297	1.03951738355703	1.01668427655862	1.06286328571439	0.000625705137434448	0.00229616564196128
NCR1	21	Inverse variance weighted	0.0370941990494608	0.0108606615668894	1.03779077513846	1.01593289868956	1.06011892552324	0.000636734357818082	0.00231539766479303
NAT1	21	Inverse variance weighted	0.0427876802223905	0.0125392437994317	1.04371626971747	1.01837758945273	1.06968541232173	0.000644168266106758	0.00231649072217108
MUSK	21	Inverse variance weighted	0.036937459103513	0.0108307498337582	1.03762812461571	1.01583322740647	1.0598906355351	0.000648617402207903	0.00231649072217108
ZG16B	21	Inverse variance weighted	0.0357797654830573	0.0104987982949393	1.03642756423008	1.0153182608423	1.0579757474319	0.000654440723604899	0.00231660433134478
PCDHGB1	21	Inverse variance weighted	0.0366131890777859	0.0107541342696256	1.03729170746499	1.01565638266091	1.05938790396483	0.000662686254702743	0.00232521492878155
CBFB	21	Inverse variance weighted	0.0388564235664331	0.0114290627189055	1.03962120782889	1.01659159743591	1.06317252522416	0.000674373998598171	0.00233020480954284
FSTL4	21	Inverse variance weighted	0.0413605146602534	0.0121676139603485	1.04222777621667	1.01766622521654	1.06738212451377	0.000675759394767425	0.00233020480954284
NLGN2	21	Inverse variance weighted	0.0375536815860742	0.0110612655963386	1.03826773144445	1.01600025589077	1.06102323883145	0.000686130815736853	0.00234574637858753
FKBP7	21	Inverse variance weighted	0.0367493853620644	0.01083253757567	1.03743299236228	1.01563863503772	1.05969502981914	0.000692578938192484	0.00234772521421181
HS6ST1	21	Inverse variance weighted	0.0373534783225038	0.0110224743619581	1.03805988766235	1.01587410448813	1.06073018852718	0.000701871808758751	0.00234904246045806
PCDH10	21	Inverse variance weighted	0.0342317504825793	0.0101046006975959	1.03482439999503	1.01453130068047	1.05552341076792	0.000704712738137419	0.00234904246045806
GUSB	21	Inverse variance weighted	0.0374380911424918	0.011073162466187	1.03814772455277	1.01585913481547	1.06092533999792	0.00072228979529475	0.00236072470784195
TFR2	21	Inverse variance weighted	0.0358828169469528	0.0106187102189947	1.03653437511121	1.01518427213551	1.05833348710879	0.000726953235503665	0.00236072470784195
DCLK3	21	Inverse variance weighted	0.0367569037885891	0.0108855701743101	1.03744079225533	1.01554070632971	1.0598131524685	0.000733708415488256	0.00236072470784195
ULK3	21	Inverse variance weighted	0.0364998549604236	0.010809495381715	1.03717415358644	1.01543109251255	1.05938279101342	0.000733750333781796	0.00236072470784195
AP1S2	21	Inverse variance weighted	0.0362605102103537	0.0107465695220576	1.03692594110323	1.0153132991181	1.05899864432659	0.000740446927773957	0.00236072470784195
DPYSL2	21	Inverse variance weighted	0.0357195996439749	0.0105977802785399	1.03636520857188	1.01506022965828	1.05811735516406	0.000750375282064595	0.00236072470784195
ALKBH3	21	Inverse variance weighted	0.0378811862972474	0.0112407344844052	1.03860782470599	1.01597561380501	1.06174419826925	0.000751703414624888	0.00236072470784195
KDELC2	21	Inverse variance weighted	0.0365310024417543	0.0108444736762914	1.03720645945214	1.01539310597025	1.05948842197553	0.000755431906509424	0.00236072470784195
MGAT1	21	Inverse variance weighted	0.0367640652572549	0.0109284518615821	1.03744822188166	1.01546262782029	1.05991	0.000768023612866874	0.00238146856702907
DCBLD1	21	Inverse variance weighted	0.0403638137286133	0.012007734569412	1.04118950433036	1.0169710534455	1.06598470060171	0.000775247054310648	0.00238537555172507
CD72	21	Inverse variance weighted	0.0364849854942155	0.0108784646568995	1.03715873147507	1.01527873927372	1.05951025335612	0.000796890188828157	0.00242110012003508
RNF43	21	Inverse variance weighted	0.0364157209040652	0.0108601404416009	1.03708689558848	1.01524488117749	1.05939881987283	0.000798963039611575	0.00242110012003508
ALDH3B1	21	Inverse variance weighted	0.0402663333665819	0.0120178642130308	1.04108801374729	1.01685173469277	1.06590195540725	0.00080654193638733	0.00242357064730919
CSDE1	21	Inverse variance weighted	0.0360990166456026	0.0107938991982771	1.0367584977575	1.01505517864887	1.05892586460485	0.000824635008067414	0.00242357064730919
GALNT2	21	Inverse variance weighted	0.0377611492957449	0.0112940482509761	1.03848316081927	1.01574752039286	1.06172769674895	0.000827419222198376	0.00242357064730919
PIK3R1	21	Inverse variance weighted	0.0356496765841608	0.0106641593985535	1.03629274527887	1.01485721138887	1.0581810345989	0.000828949371634915	0.00242357064730919
PLEKHA1	21	Inverse variance weighted	0.0362619812582173	0.0108544173467123	1.03692746647204	1.01510019637153	1.05922407912785	0.000835500222707067	0.00242357064730919
PPIL1	21	Inverse variance weighted	0.0376183834052441	0.0112621706673369	1.03833491142877	1.01566597353717	1.06150980379607	0.000837052029469729	0.00242357064730919
RAB14	21	Inverse variance weighted	0.0359376774342403	0.0107732472791573	1.03659124145196	1.01493250502167	1.05871217695602	0.000850464021765379	0.00242357064730919
ARFGAP1	21	Inverse variance weighted	0.0371007567828318	0.0111239895037041	1.03779758071597	1.01541534669328	1.06067317383697	0.000852373266743797	0.00242357064730919
PGF	21	Inverse variance weighted	0.0361068089223696	0.0108335213932986	1.03676657649813	1.01498426203723	1.05901635557007	0.000859525148912088	0.00242357064730919
PEF1	21	Inverse variance weighted	0.0445689545337592	0.0133736053760398	1.04557707150427	1.01852620767845	1.07334637460854	0.000860367579794761	0.00242357064730919
FAM163B	21	Inverse variance weighted	0.0363885216467907	0.0109361616262799	1.03705868797881	1.01506600999738	1.05952786490713	0.000876737526159444	0.00245241266058586
IFNL3	21	Inverse variance weighted	0.0395025823093111	0.0118878534614526	1.04029318524027	1.01633436002043	1.06481681012496	0.000890751852300289	0.00247431070083414
IL17C	21	Inverse variance weighted	0.0359384008525	0.0108281690091011	1.03659199134126	1.01482399101986	1.05882691582112	0.000903491566556337	0.00249239052843127
HSPB1	21	Inverse variance weighted	0.0362496280091367	0.0109358844509742	1.03691465712789	1.01492558494936	1.05938013792439	0.000917279678435755	0.00250123057152097
CKS1B	21	Inverse variance weighted	0.0362296132286408	0.0109317768229733	1.03689390371632	1.01491344262523	1.05935040606324	0.000919202235033957	0.00250123057152097
SLAMF7	21	Inverse variance weighted	0.0384866501637181	0.0116288395207074	1.03923685462351	1.01581792427229	1.06319569107965	0.000934338943771069	0.00251649513793303
ARID1A	21	Inverse variance weighted	0.0354696434516311	0.0107202040280158	1.03610619504284	1.01456306660064	1.05810676807213	0.000937394438880054	0.00251649513793303
GABBR2	21	Inverse variance weighted	0.0348894352461564	0.0105579728687083	1.03550521209121	1.01429704740101	1.05715682305849	0.000951262412564938	0.00253669976683983
DOC2B	21	Inverse variance weighted	0.0398532423004188	0.0120802691631328	1.04065803840532	1.01630745314376	1.06559206030384	0.000970174845103799	0.00256999958967894
RRM1	21	Inverse variance weighted	-0.0358914	0.0108986123643676	0.964745070503227	0.944355430422959	0.985574944640725	0.000990514667354854	0.00258394583999908
RSPO3	21	Inverse variance weighted	0.035374626433667	0.0107480656906774	1.03600775199885	1.01441127306865	1.05806401278929	0.00099741406460454	0.00258394583999908
FCN1	21	Inverse variance weighted	0.0416417443632641	0.0126573696514198	1.04252092284348	1.01697577817577	1.06870772922045	0.00100215566998113	0.00258394583999908
BNIP3L	21	Inverse variance weighted	0.0396854011904321	0.0120702984908395	1.04048338786222	1.01615674735413	1.06539240450465	0.00100953525055616	0.00258394583999908
DLL1	21	Inverse variance weighted	0.0366315641827301	0.0111459238037463	1.03731076798409	1.01489540053919	1.0602212097957	0.00101425082981661	0.00258394583999908
LEPRE1	21	Inverse variance weighted	0.0357560649821677	0.0108900391055462	1.03640300066875	1.01451593594347	1.05876225472622	0.00102572695567753	0.00258394583999908
CROT	21	Inverse variance weighted	0.0356932840979043	0.0108755379663134	1.03633793641433	1.01448107914294	1.05866569671152	0.00103081386601077	0.00258394583999908
NUDT12	21	Inverse variance weighted	0.0363110590911065	0.0110653084112234	1.03697835787377	1.01473049452926	1.05971400336937	0.00103248267797278	0.00258394583999908
EQTN	21	Inverse variance weighted	0.0344949844886396	0.0105128423062766	1.03509683682315	1.01398672520383	1.05664643823213	0.00103357833599963	0.00258394583999908
TNFRSF10D	21	Inverse variance weighted	0.0354227202295693	0.0108164227329736	1.03605757874239	1.0143241530762	1.05825667585075	0.00105698779596917	0.00259953587673076
C1orf115	21	Inverse variance weighted	0.0355700650575943	0.0108670108501649	1.03621024771537	1.01437303668371	1.05851756566865	0.0010633148846137	0.00259953587673076
POGLUT1	21	Inverse variance weighted	0.0359053548890505	0.0109707031364535	1.03655773672619	1.01450699648063	1.05908775917194	0.00106472770398723	0.00259953587673076
IL1RAPL2	21	Inverse variance weighted	0.0349969772073036	0.0106940909918511	1.03561657834066	1.01413553390311	1.05755262633021	0.00106580970945961	0.00259953587673076
IL6R	21	Inverse variance weighted	0.032178942687462	0.0098565398046197	1.03270228329421	1.01294317169018	1.05284682865435	0.00109568407524767	0.00264757942251374
WRNIP1	21	Inverse variance weighted	0.0354096614809778	0.0108507814675635	1.03604404921529	1.01424260279759	1.05831412420824	0.00110111910534419	0.00264757942251374
EDC4	21	Inverse variance weighted	0.0366138259150847	0.0112238653678922	1.03729236805125	1.01472237183586	1.0603643781606	0.00110574320071205	0.00264757942251374
SEMA4A	21	Inverse variance weighted	0.0370088890766729	0.0113505225390443	1.03770224501198	1.01487135934511	1.06104674192182	0.00111198335745577	0.00264757942251374
PSMD5	21	Inverse variance weighted	0.0352577274943779	0.0108289558024894	1.03588665086998	1.01413189849561	1.05810807750198	0.00113043469825214	0.00267558508462045
TIGIT	21	Inverse variance weighted	0.0354837593424372	0.0109143832615022	1.03612082070798	1.01419132230979	1.05852449285369	0.00114959121509098	0.00270492050609642
SIRT2	21	Inverse variance weighted	0.0350203293226345	0.0107819799758732	1.03564076246081	1.01398452992656	1.0577595192188	0.0011620190769378	0.00271817327938667
APMAP	21	Inverse variance weighted	0.0348097017448731	0.0107374026643578	1.03542265092654	1.01385955790342	1.05744435478693	0.00118731175080391	0.00276119011814863
TRAF1	21	Inverse variance weighted	0.0352184037474404	0.010877708874029	1.03584591672638	1.01399512184568	1.05816757899749	0.00120511202024965	0.00277238990253257
TRAT1	21	Inverse variance weighted	0.0351325216973717	0.0108526417579709	1.03575695997544	1.01395785770007	1.05802472162991	0.00120695148140637	0.00277238990253257
VWA2	21	Inverse variance weighted	0.0362341131625164	0.0111978002713339	1.03689856968083	1.01438896331691	1.05990767120585	0.001212920582358	0.00277238990253257
CYP3A4	21	Inverse variance weighted	0.0498371598439318	0.0154192845208801	1.0510999211641	1.01980900746824	1.0833509374603	0.00122870369107063	0.00277771810571733
VPS4B	21	Inverse variance weighted	0.0352457276996867	0.0109085943933784	1.03587422051743	1.01396144593791	1.05826055323043	0.00123355597160193	0.00277771810571733
TENM3	21	Inverse variance weighted	0.0349679809536917	0.0108276478244983	1.03558654977507	1.0138406989679	1.05779882694273	0.00124003184376644	0.00277771810571733
APOC3	21	Inverse variance weighted	-0.0508357	0.0157520408902109	0.950434852566807	0.921539479889792	0.980236255403532	0.0012498937883311	0.00277771810571733
ULBP1	21	Inverse variance weighted	0.0347514975005228	0.0107682303232904	1.0353623866874	1.01373929447068	1.05744670016639	0.0012499731475728	0.00277771810571733
LYZ	21	Inverse variance weighted	0.0352330327684555	0.0109241931585485	1.0358610702489	1.01391757428511	1.05827947366802	0.00125871611554167	0.00278169307302027
CNN1	21	Inverse variance weighted	0.036185751038454	0.011239656729057	1.03684842427614	1.0142566948278	1.05994336582263	0.00128427264461642	0.00281823176179725
SLAMF6	21	Inverse variance weighted	0.0391473353638514	0.0121638218074934	1.03992368989876	1.01542398513807	1.06501451279547	0.00128934103102224	0.00281823176179725
ADRM1	21	Inverse variance weighted	0.0375745580165349	0.0116912973796991	1.0382894069948	1.01476759430961	1.06235644370478	0.00130949272232989	0.0028467233094128
CSRP2	21	Inverse variance weighted	0.0352238927319544	0.0109752568751485	1.03585160248418	1.01380683526596	1.05837572311056	0.00133016381807928	0.00287602987692817
NOG	21	Inverse variance weighted	0.0360521361260359	0.0112481856287464	1.03670989511972	1.01410423150118	1.05981946751979	0.00134991528982747	0.00289284287793108
FAIM	21	Inverse variance weighted	0.0357454200224244	0.0111543359958018	1.03639196825925	1.01397973673235	1.05929958258703	0.00135240404543278	0.00289284287793108
INHBC	21	Inverse variance weighted	0.0362506521102711	0.0113224298702472	1.03691571903391	1.01415797768204	1.06018414491702	0.00136634763977628	0.00290712263782187
SPG21	21	Inverse variance weighted	0.0341256844221012	0.0106755315753048	1.03471464606832	1.01328916895738	1.05659315384759	0.00139044964916621	0.00294254384035173
DUSP13	21	Inverse variance weighted	0.0347208659572969	0.010866829350983	1.03533067242543	1.01351235820731	1.05761867882979	0.00139770832416707	0.00294254384035173
MAP2K6	21	Inverse variance weighted	0.0351451792378105	0.0110243450744328	1.03577007019402	1.01362950923167	1.05839424418782	0.00143279990974517	0.00296844623290392
ZWINT	21	Inverse variance weighted	0.0348568995992169	0.0109351098275189	1.0354715218073	1.01351459189767	1.05790412989157	0.00143452331613413	0.00296844623290392
PI3	21	Inverse variance weighted	0.0357361803876366	0.0112126725445251	1.03638239242021	1.01385443759875	1.05941092082463	0.00143695039419394	0.00296844623290392
MAPK8	21	Inverse variance weighted	0.0381538515866706	0.0119733216236525	1.03889105562098	1.01479451244459	1.06355977709152	0.0014396964229584	0.00296844623290392
MAPK12	21	Inverse variance weighted	0.0347882288439593	0.0109244597852119	1.03540041763726	1.0134661504305	1.05780940427861	0.00145037028685264	0.00297511853713362
DCUN1D1	21	Inverse variance weighted	0.0354738430476887	0.0111648098385448	1.03611054627947	1.01368359072004	1.05903368066656	0.00148658103846606	0.00300331965863037
MAGOHB	21	Inverse variance weighted	0.0348862243316443	0.0109804512296285	1.03550188717784	1.01345424456018	1.05802917507559	0.00148744862897147	0.00300331965863037
GCNT2	21	Inverse variance weighted	0.0376205394472903	0.0118465470143069	1.03833715012491	1.01450550572218	1.0627286212331	0.00149498927323656	0.00300331965863037
CNPY4	21	Inverse variance weighted	0.0352565025492544	0.0111036529387524	1.03588538196645	1.01358478878024	1.05867662621803	0.00149724721262699	0.00300331965863037
MANSC1	21	Inverse variance weighted	0.0356385851630817	0.0112317214209514	1.03628125138342	1.01371764641187	1.05934708325327	0.00150857113921748	0.00300331965863037
ILK	21	Inverse variance weighted	0.0351396000783487	0.0110748641092831	1.03576429148375	1.01352349270995	1.05849314320715	0.00150916812846176	0.00300331965863037
PDLIM1	21	Inverse variance weighted	0.0375108241608252	0.0118372608907479	1.03822323491627	1.01441266802208	1.06259268983868	0.00153029124555696	0.0030302796941722
IER3	21	Inverse variance weighted	0.0340797784001114	0.0107865495033627	1.03466714752527	1.01302220125965	1.05677457496677	0.00158056430047988	0.00309915091426309
TMEM106A	21	Inverse variance weighted	0.0386244650792408	0.0122283974639604	1.03938008683238	1.01476474372748	1.06459252903824	0.00158535634226533	0.00309915091426309
GPX7	21	Inverse variance weighted	0.03471475963451	0.0109969284091702	1.03532435038145	1.01324776419162	1.05788194000896	0.00159527821000329	0.00309915091426309
CTNNA2	21	Inverse variance weighted	0.0387322662461387	0.0122701499216341	1.03949213925817	1.01479109380595	1.06479443323353	0.00159606272084549	0.00309915091426309
CCDC134	21	Inverse variance weighted	0.0342531235399638	0.0108594161889828	1.03484651759267	1.01305312568908	1.05710874170122	0.00160920824432905	0.00310699552621972
ZYX	21	Inverse variance weighted	0.0355508582910616	0.0112840982149527	1.03619034565819	1.01352466775491	1.05936290116512	0.00162976083573036	0.00310699552621972
TINF2	21	Inverse variance weighted	0.0336060108683229	0.0106681538949563	1.03417707192468	1.01277737108661	1.05602894241921	0.00163201008402504	0.00310699552621972
SERPINB4	21	Inverse variance weighted	0.0438371823138865	0.0139256084316148	1.04481222712967	1.01668058272923	1.07372227669504	0.00164417259904548	0.00310699552621972
NXPH3	21	Inverse variance weighted	0.0433605296046438	0.0137812231816151	1.04431433322163	1.01648371385124	1.07290693565577	0.00165322938575509	0.00310699552621972
PRKAR2A	21	Inverse variance weighted	0.0337513801682737	0.010727338296468	1.03432742044942	1.01280711464056	1.0563049935458	0.00165352641445226	0.00310699552621972
BAG3	21	Inverse variance weighted	0.0338047727098083	0.0107448811359711	1.03438264729351	1.01282636684466	1.0563977163778	0.001654475117712	0.00310699552621972
NCF4	21	Inverse variance weighted	0.0339930089194065	0.0108095941857472	1.03457737388903	1.01288855490719	1.05673061204765	0.00166253120446741	0.00310753496162133
KCNMB3	21	Inverse variance weighted	0.0549071944920251	0.017494643748696	1.05644256643683	1.0208317056586	1.09329568232758	0.00169806486718017	0.00315919045056776
PCDHGA12	21	Inverse variance weighted	0.0336347633764372	0.0107316161000985	1.03420680753682	1.01268052036019	1.05619067341699	0.00172338016316835	0.00319144474660806
PGM2	21	Inverse variance weighted	0.0337481272034344	0.0107744601674196	1.03432405582416	1.01271028292617	1.05639912074886	0.00173481727181136	0.00319368234634135
ARL14	21	Inverse variance weighted	0.0333422626850139	0.0106528353431929	1.03390434556786	1.01254068854901	1.05571875567386	0.0017486842678434	0.00319368234634135
ID1	21	Inverse variance weighted	0.033220642746436	0.0106183754603205	1.03378	1.01248593327894	1.05551907341876	0.00175641611253345	0.00319368234634135
TPK1	21	Inverse variance weighted	0.0338267471450846	0.0108121688563334	1.03440537751779	1.0127150537258	1.05656026450992	0.00175652529048774	0.00319368234634135
CTF1	21	Inverse variance weighted	0.0336827541776335	0.0107769826223158	1.03425644114108	1.01263907464294	1.05633528552016	0.00177542554319122	0.00321343989717868
EIF4A1	21	Inverse variance weighted	0.0338690014805844	0.0108421517685689	1.03444908655309	1.01269833173822	1.05666700451042	0.00178515659584934	0.00321649837089971
STK17B	21	Inverse variance weighted	0.0365670328831828	0.0117238032267292	1.03724383113199	1.01368112016798	1.0613542501838	0.00181440189530374	0.00325453254763003
PPARGC1A	21	Inverse variance weighted	0.0379425643180204	0.0121745248802332	1.03867157435502	1.01418009264003	1.06375450198869	0.00182978160195755	0.00326746714635277
JAK2	21	Inverse variance weighted	0.0341646960666705	0.0109836363809726	1.0347550127757	1.01271695011074	1.05727265288426	0.00186765420020415	0.00332027413369627
PPCDC	21	Inverse variance weighted	0.0334643359569031	0.0107739684199756	1.03403056535802	1.01242390118829	1.05609834856691	0.00189613499896331	0.00335599114860763
UTS2B	21	Inverse variance weighted	0.0332091210674137	0.010703029458025	1.03376669903429	1.01230629015526	1.05568205831099	0.00191713591110731	0.00337821305921993
PLXNA4	21	Inverse variance weighted	0.0380752547062893	0.0122836453058221	1.03880940523372	1.01409775911636	1.06412322747103	0.00193735944457413	0.00338683128092178
IL2RB	21	Inverse variance weighted	0.0347516310700162	0.011212280112746	1.03536252498024	1.01285751818187	1.05836757775931	0.00193896090832772	0.00338683128092178
IL13	21	Inverse variance weighted	0.0337394899159746	0.0108917022312872	1.03431512210854	1.01246884944259	1.05663277681223	0.00195012803952532	0.00339152702526143
ARPC3	21	Inverse variance weighted	0.0366610384731213	0.0118589450702759	1.03734134243347	1.01350792481599	1.0617352211795	0.0019919834174151	0.00344711640937695
CD3E	21	Inverse variance weighted	0.0334250798544383	0.0108186167697419	1.03398997414493	1.01229556751565	1.05614931146649	0.00200433614424671	0.00344711640937695
GABBR2	21	Inverse variance weighted	0.0333937040794155	0.0108112678021699	1.03395753241707	1.01227838718496	1.05610096232021	0.00200975431687776	0.00344711640937695
CUL4B	21	Inverse variance weighted	0.0337476798617213	0.0109318597856142	1.03432359312797	1.0123974538102	1.05672460087173	0.0020212360060033	0.00344711640937695
BLMH	21	Inverse variance weighted	0.0325992709634829	0.010561839665179	1.03313644850416	1.01196912875759	1.05474652427215	0.00202518089050896	0.00344711640937695
PDGFD	21	Inverse variance weighted	0.0345876378527884	0.0112129214298137	1.03519274647041	1.01269015710436	1.05819535701729	0.00203810163080943	0.0034544095437448
PIEZO1	21	Inverse variance weighted	0.0366908291374794	0.0119127513272037	1.03737224598155	1.01343123597906	1.06187883156489	0.00207026555809571	0.00348452565509985
PYGL	21	Inverse variance weighted	0.0329578519943391	0.0107035250653597	1.03350697806534	1.01205097774889	1.05541785660404	0.00207586091195958	0.00348452565509985
MYL5	21	Inverse variance weighted	0.0357719722631386	0.0116207727914475	1.03641948715361	1.01308006290932	1.06029660702927	0.00208200407892216	0.00348452565509985
MAGI2	21	Inverse variance weighted	0.0322825230280111	0.0104999557356532	1.03280925648846	1.01177135322152	1.05428460382068	0.00210828180387795	0.00351380300646325
ZHX1	21	Inverse variance weighted	0.0347393804097736	0.011303628508591	1.03534984118341	1.01266378363658	1.05854411993389	0.00211709376486698	0.00351384857239333
TMEM38B	21	Inverse variance weighted	0.0331251030781042	0.010786789880637	1.03367984768341	1.01205507863413	1.05576667719394	0.00213417924901573	0.00352756900663757
ACTN1	21	Inverse variance weighted	0.0330333904849898	0.0107729319737301	1.03358505057124	1.01198975147851	1.0556411813495	0.00216702249790984	0.00356648384193474
MRPL21	21	Inverse variance weighted	0.0387074238784038	0.0126367117391779	1.03946631613295	1.01403707627025	1.06553325086413	0.00219061933273477	0.00356648384193474
CXCL9	21	Inverse variance weighted	0.0382276988598069	0.0124835989971634	1.03896777772534	1.01385494718746	1.06470264424517	0.00219691780336713	0.00356648384193474
MCF2L	21	Inverse variance weighted	0.0334651695087769	0.0109307508475959	1.03403142727649	1.01211368129062	1.0564238112383	0.0022018551557707	0.00356648384193474
PGRMC2	21	Inverse variance weighted	0.0332538803975072	0.0108619537222111	1.03381297077475	1.01203631145097	1.05605821298034	0.0022023037723947	0.00356648384193474
IL12B	21	Inverse variance weighted	0.0339725715786036	0.011101618965949	1.03455623009472	1.01228828652457	1.05731401565696	0.00221229336828676	0.00356821511013994
CD86	21	Inverse variance weighted	0.0328739519831361	0.0107663858981968	1.03342027045574	1.0118413963642	1.0554593429625	0.00226273274884556	0.00363491204633825
DCTN6	21	Inverse variance weighted	0.0330584607830907	0.0108452717086571	1.03361096318139	1.01187164339799	1.05581733629881	0.00230223464400707	0.00366303470276918
TIE1	21	Inverse variance weighted	0.0321548470835723	0.0105506170924082	1.03267740000885	1.01154173530728	1.05425468398007	0.00230619553800689	0.00366303470276918
COL20A1	21	Inverse variance weighted	0.0353400231780023	0.0116016740258199	1.03597190337798	1.01268046594598	1.05979903896541	0.00231819822347239	0.00366303470276918
MYL12A	21	Inverse variance weighted	0.0329731720842233	0.0108278243595816	1.03352281160643	1.01181994627922	1.05569118896978	0.00232505537589286	0.00366303470276918
NT5C3A	21	Inverse variance weighted	0.0353527184613196	0.0116097056467481	1.03598505541828	1.01267738062348	1.0598291771751	0.00232602703625843	0.00366303470276918
LYPD1	21	Inverse variance weighted	0.037782093585872	0.0124251200295483	1.03850491133965	1.01351943041844	1.06410633926507	0.0023596383612566	0.00366773898232267
PARP11	21	Inverse variance weighted	0.0368888282317976	0.0121364892187757	1.03757766508245	1.0131875075415	1.06255495953581	0.00236973195795615	0.00366773898232267
CGA	21	Inverse variance weighted	0.033046017485029	0.0108722117613334	1.03359810173212	1.01180562517553	1.05585994910722	0.0023697627964669	0.00366773898232267
PNMT	21	Inverse variance weighted	0.0322382468820901	0.0106088761621294	1.03276352868745	1.01151059246187	1.05446301218754	0.00237522928518418	0.00366773898232267
PRKACA	21	Inverse variance weighted	0.0324792916063037	0.0106928183373578	1.03301250089291	1.01158799425213	1.0548907589497	0.00238560070932641	0.00366773898232267
MSTN	21	Inverse variance weighted	0.0319861948270148	0.0105313106361457	1.03250325132074	1.01140942256632	1.05403701033642	0.00238749491321159	0.00366773898232267
DEFB108B	21	Inverse variance weighted	0.0362662171293148	0.011943317650513	1.03693185877243	1.01294	1.06149163282626	0.00239319968596554	0.00366773898232267
LSM1	21	Inverse variance weighted	0.0329512995122135	0.0108752682403269	1.03350020605153	1.01170373270587	1.05576626968825	0.00244610572868668	0.00373451256288043
HAMP	21	Inverse variance weighted	-0.0392375	0.0129721876170755	0.961522348597954	0.937383347248399	0.986282964773359	0.00248848472210857	0.00378476763818794
CREG1	21	Inverse variance weighted	0.0333558475850847	0.0110381190660536	1.03391839115048	1.01179009588221	1.05653064198768	0.00251211891785005	0.00380624078462129
TIAL1	21	Inverse variance weighted	0.0328478746786256	0.0108961671482398	1.03339332199203	1.01155766669476	1.05570032544667	0.0025729585531096	0.00380758610225823
KEAP1	21	Inverse variance weighted	0.036758358883303	0.0121951608796547	1.03744230183104	1.01293883517707	1.06253851886362	0.00257678439677125	0.00380758610225823
C10orf54	21	Inverse variance weighted	0.0327618020444801	0.0108693939899013	1.03330437893454	1.01152368171611	1.05555407038403	0.00257714572279039	0.00380758610225823
MFN1	21	Inverse variance weighted	0.032181612587778	0.0106783797268889	1.03270504051004	1.01131553004362	1.05454694307805	0.00258068563917826	0.00380758610225823
DKK4	21	Inverse variance weighted	0.0357485918813923	0.0118619764003802	1.03639525555362	1.0125775585852	1.06077318880624	0.00258071855796241	0.00380758610225823
TGFBR2	21	Inverse variance weighted	0.0333647658775761	0.0110728127683721	1.03392761197822	1.01173031970905	1.05661191128325	0.00258495685043097	0.00380758610225823
RXFP1	21	Inverse variance weighted	0.0333176576512645	0.0110589982274971	1.03387890662951	1.01171005320729	1.05653352972506	0.00258918266495097	0.00380758610225823
VAMP3	21	Inverse variance weighted	0.0337518790695138	0.0112134717427391	1.03432793647678	1.01184305460268	1.05731247085191	0.00261299154009519	0.00380758610225823
TRIB2	21	Inverse variance weighted	0.0323743781636855	0.0107626755539778	1.03290412968007	1.01134338787693	1.05492452306415	0.00262953030779742	0.00380758610225823
PTK2B	21	Inverse variance weighted	0.0324513922706725	0.0107884723105094	1.03298368093247	1.01137014075551	1.05505911443627	0.00262999803525183	0.00380758610225823
FRS2	21	Inverse variance weighted	0.0343249278449503	0.0114194239001832	1.03492082669546	1.01201445767221	1.05834566829372	0.00264850857148423	0.00380758610225823
CES1	21	Inverse variance weighted	0.0329069159198525	0.010948652042488	1.03345433661761	1.01151333195212	1.05587126944986	0.00265085499528964	0.00380758610225823
GP1BA	21	Inverse variance weighted	0.0332627087662423	0.0110783144434428	1.03382209769715	1.01161616210159	1.05651547467032	0.00267766442462108	0.00380758610225823
LGR5	21	Inverse variance weighted	0.0327440930944945	0.0109065141424196	1.03328608036099	1.01143217892261	1.0556121765921	0.0026799110317527	0.00380758610225823
CDC25B	21	Inverse variance weighted	0.03254792925428	0.0108413112875011	1.03308340687469	1.01136303346653	1.05527025434346	0.00268024278808038	0.00380758610225823
GRHPR	21	Inverse variance weighted	0.032859915787397	0.0109492286493213	1.03340576526834	1.01146464870194	1.05582283776341	0.00268991224838889	0.00380758610225823
GTF2I	21	Inverse variance weighted	0.0329186187107089	0.0109738745322387	1.03346643098834	1.01147516494727	1.0559358262004	0.00270222413374357	0.00380758610225823
STK17B	21	Inverse variance weighted	0.0350683944164011	0.0116946207244657	1.03569054182748	1.01222101146427	1.0597042407559	0.00271154281721198	0.00380758610225823
JPH4	21	Inverse variance weighted	0.032662963515561	0.0108933012100399	1.03320225369683	1.0113763168091	1.05549920371105	0.00271361214823192	0.00380758610225823
DEFB4A	21	Inverse variance weighted	0.0394329078522156	0.0131548493622624	1.04022070590237	1.01374298148299	1.06738999603736	0.00272119223562944	0.00380758610225823
CFI	21	Inverse variance weighted	0.0345087245660923	0.0115201031036371	1.03511105923157	1.01200076063739	1.05874911029579	0.00273975359471268	0.00380758610225823
RPA2	21	Inverse variance weighted	0.0322068372742722	0.0107558722836573	1.03273109049948	1.0111874441975	1.05473373053071	0.00275030997386096	0.00380758610225823
B3GNT4	21	Inverse variance weighted	0.0337035302983115	0.0112559702859556	1.03427792920093	1.01170985836457	1.05734942284876	0.00275093076069876	0.00380758610225823
RPSA	21	Inverse variance weighted	0.0354431978209764	0.0118436631498293	1.03607879492339	1.0123047056113	1.06041122138386	0.0027662339390359	0.00380758610225823
LYG2	21	Inverse variance weighted	0.032782205224732	0.0109559822000138	1.03332546184511	1.01137266268154	1.05575	0.00276998322978903	0.00380758610225823
SEPT6	21	Inverse variance weighted	0.0403538887270771	0.0134946390350081	1.04117917057421	1.01400151192529	1.06908525528656	0.00278644777012278	0.00380758610225823
EMC8	21	Inverse variance weighted	0.0315076453793976	0.0105409315768998	1.03200926566786	1.01090646605127	1.05355258888047	0.00279822538289643	0.00380758610225823
UBE2T	21	Inverse variance weighted	0.0322608641320829	0.0107936019146865	1.03278688722251	1.01116729828928	1.05486872075803	0.00279995010579193	0.00380758610225823
NEDD9	21	Inverse variance weighted	0.0323006797704109	0.0108079183404011	1.03282800911033	1.01117918507963	1.05494032328088	0.00280247314517309	0.00380758610225823
FAM175B	21	Inverse variance weighted	0.0321814856457986	0.0107708532989163	1.03270490941643	1.01113211917817	1.05473796124646	0.0028096518878002	0.00380758610225823
KLRG2	21	Inverse variance weighted	0.0315257881050724	0.0105517243518871	1.03202798929871	1.01090342210194	1.05359399069136	0.00281050347150067	0.00380758610225823
FGFBP3	21	Inverse variance weighted	0.0347212880853093	0.0116257410224013	1.0353311094676	1.01200634001378	1.05919346929863	0.00282110468713798	0.00380758610225823
PSMB4	21	Inverse variance weighted	0.0317097776965755	0.0106220218471811	1.03221788917615	1.01095013349083	1.05393306300496	0.00283312897141483	0.00380758610225823
PTS	21	Inverse variance weighted	0.0322975799829984	0.0108233002856544	1.03282480756803	1.0111455655484	1.05496885856329	0.00284433590659543	0.00380758610225823
ASH2L	21	Inverse variance weighted	0.0318704520565998	0.0106808708816518	1.03238375344961	1.01099596115429	1.05422400814522	0.00284617061143803	0.00380758610225823
EMC1	21	Inverse variance weighted	0.0324940994398072	0.0109013680282203	1.03302779768329	1.01118955809333	1.05533766863512	0.00287556632256305	0.00383408843008407
S100A5	21	Inverse variance weighted	0.0324824753273555	0.0109094959787656	1.03301578972179	1.01116169525458	1.05534221363663	0.00290657351322996	0.00385707806986968
SIGLEC12	21	Inverse variance weighted	0.0322386544505701	0.010829722660194	1.0327639496094	1.01107325769026	1.05491997488826	0.00291209394275161	0.00385707806986968
SEPT11	21	Inverse variance weighted	0.0346072067213327	0.011631902269045	1.03521300421939	1.01187867597071	1.05908543143957	0.00292799955984253	0.0038653459535875
PFDN1	21	Inverse variance weighted	0.0350179124119592	0.0117905997726685	1.03563825941262	1.01197952339132	1.05985010523228	0.00297813637121982	0.00391783725255668
LDHB	21	Inverse variance weighted	0.0324330248039713	0.010923754082174	1.03296470781335	1.01108343800187	1.05531951912553	0.00298735090507447	0.00391783725255668
KIAA1161	21	Inverse variance weighted	0.0311730334196269	0.0105134266296489	1.03166400079308	1.01062274214124	1.05314334038965	0.003026152313217	0.0039557546578
SERPINH1	21	Inverse variance weighted	0.0323636648518923	0.0109300380595588	1.03289306391536	1.01100085956957	1.05525932187502	0.00306658139346992	0.00398847008614761
PCDH8	21	Inverse variance weighted	0.0318938862829582	0.0107730398777511	1.03240794684765	1.01083702789003	1.05443918189168	0.00307112196633366	0.00398847008614761
SULF2	21	Inverse variance weighted	0.037139882346788	0.0125498197474238	1.03783818592594	1.0126212193446	1.06368312216801	0.00308243044017447	0.00399020121705433
BATF	21	Inverse variance weighted	0.0338169662507048	0.0114345636020016	1.03439526015752	1.01147050910064	1.05783959552882	0.00310211232132798	0.0039965652465305
LRRTM1	21	Inverse variance weighted	0.0377380770558613	0.0127666087178372	1.03845920096307	1.01279670998645	1.06477193441839	0.00311658540488213	0.0039965652465305
GKN1	21	Inverse variance weighted	0.0320156544006292	0.0108310075123565	1.03253366887432	1.01084526781608	1.05468740993606	0.00311732089229379	0.0039965652465305
S100A11	21	Inverse variance weighted	0.0340031151045731	0.0115299358103521	1.03458782957238	1.01146971947171	1.05823432624195	0.00318684609648117	0.00406774102281813
DEF6	21	Inverse variance weighted	0.0325708397816312	0.0110516473230457	1.03310707563147	1.01097	1.05572957534439	0.00320719711410646	0.00406774102281813
DYNLT1	21	Inverse variance weighted	0.0328450319891609	0.0111479073682668	1.0333903843799	1.01105580217757	1.05621834544527	0.00321604749187187	0.00406774102281813
CKB	21	Inverse variance weighted	0.0343469591971857	0.0116587311701648	1.03494362765189	1.01156217727645	1.05886552154524	0.00321882303638396	0.00406774102281813
RNF148	21	Inverse variance weighted	0.0335196808720214	0.0113797232058942	1.03408779527557	1.01127855203345	1.05741149773986	0.00322368476058337	0.00406774102281813
TMEM119	21	Inverse variance weighted	0.0332344421743573	0.0112866961862207	1.03379287548284	1.01117449102094	1.05691719766391	0.00323406078252869	0.00406800098431282
DIXDC1	21	Inverse variance weighted	0.0313930545022951	0.0106808285266663	1.03189101359637	1.01051351323249	1.05372075682075	0.00329064307729645	0.00412619821604571
XRCC6	21	Inverse variance weighted	0.0316579065141984	0.0107841384078886	1.03216434820239	1.01057653551388	1.05421331711243	0.00332904305130239	0.00415903600108659
XRCC4	21	Inverse variance weighted	0.0317170839689186	0.0108072382993958	1.03222543086871	1.01059058431037	1.05432343886242	0.00333762639087199	0.00415903600108659
B3GNT8	21	Inverse variance weighted	0.0332480874399274	0.0113405848493335	1.03380698195741	1.01108149099305	1.0570432605726	0.00337026588884002	0.00418666570042239
FGF8	21	Inverse variance weighted	0.0341784836228248	0.0116662070768882	1.0347692796169	1.01137694852328	1.05870265641538	0.00339289697612931	0.0042005107595788
BCL6	21	Inverse variance weighted	0.0355345659612499	0.0121395261209563	1.03617346384086	1.01181029196911	1.06112327151614	0.00342051950016739	0.0042005107595788
SYK	21	Inverse variance weighted	0.032087767978421	0.0109636255106071	1.03260813125621	1.01065543101197	1.05503767161156	0.0034252640130908	0.0042005107595788
CANX	21	Inverse variance weighted	0.0312558758771429	0.010681350414637	1.03174946991442	1.01037386837314	1.05357729647413	0.00343119084952757	0.0042005107595788
ST3GAL6	21	Inverse variance weighted	0.0282368451446565	0.00965114912774316	1.02863928379259	1.00936416484691	1.04828248615485	0.00343627461030051	0.0042005107595788
IL36B	21	Inverse variance weighted	0.0319016108771189	0.0109064853235937	1.03241592181085	1.01058048122483	1.05472	0.00344441882285462	0.0042005107595788
TREM2	21	Inverse variance weighted	-0.0371309	0.0127124773762644	0.963550043776008	0.939838423333445	0.987859895712468	0.00349111930272794	0.00422336135967954
DNAJC10	21	Inverse variance weighted	0.031251116689757	0.0107019004616695	1.03174455963704	1.01032836490744	1.05361471905042	0.00349866923669177	0.00422336135967954
MNX1	21	Inverse variance weighted	0.0316248021954826	0.0108300233083117	1.03213017967041	1.01045220311591	1.05427322984843	0.0034991378098342	0.00422336135967954
FCER2	21	Inverse variance weighted	0.0336902400740512	0.0115395382562495	1.03426418350665	1.01113427482505	1.0579231937022	0.00350538992853402	0.00422336135967954
KCNA10	21	Inverse variance weighted	0.0314333342149903	0.0107785937557313	1.03193257870704	1.01036059355143	1.05396514253774	0.00354239099323769	0.00425512431620143
PTK6	21	Inverse variance weighted	0.0431242858287825	0.0147982334690677	1.04406764960024	1.01421990270459	1.07479379376691	0.00356657427109636	0.00427134643245073
TPST2	21	Inverse variance weighted	0.032435317153799	0.011145374630518	1.03296707573254	1.01064665947084	1.05578044467698	0.00361192571999665	0.00431274712835421
SYF2	21	Inverse variance weighted	0.0313534612297541	0.0107789465847994	1.03185015846303	1.01027919760373	1.05388169136371	0.00362855340324989	0.00431367807802564
DEAF1	21	Inverse variance weighted	0.0319505297235818	0.0109887633883882	1.03246642764215	1.01046695276522	1.0549448661245	0.0036425612973611	0.00431367807802564
GBP6	21	Inverse variance weighted	0.0318606745341683	0.0109637948238372	1.03237365934365	1.01042560853392	1.0547984567147	0.00366093531376284	0.00431367807802564
MED4	21	Inverse variance weighted	0.0351569751606708	0.0120994409386735	1.03578228812993	1.01150778179804	1.06063934228623	0.00366468433058956	0.00431367807802564
ERO1L	21	Inverse variance weighted	0.0314331806570213	0.0108205019147534	1.03193242024558	1.01027745081286	1.05405155692339	0.00367294027386874	0.00431367807802564
DLG4	21	Inverse variance weighted	0.031682719398063	0.0109083154399654	1.03218995949424	1.01035567379636	1.05449609490238	0.00367892214448994	0.00431367807802564
GJD2	21	Inverse variance weighted	0.0312124701259638	0.0107542520443676	1.03170468702557	1.01018566038065	1.05368211307756	0.00370389139806174	0.00431367807802564
PGAM2	21	Inverse variance weighted	0.0322257128575217	0.0111074911705777	1.03275058408513	1.01050987495907	1.05548079772242	0.00371666104504848	0.00431367807802564
BTNL9	21	Inverse variance weighted	0.0308098602260206	0.0106227061439716	1.03128939611049	1.01003941635309	1.05298644915273	0.00372713228181394	0.00431367807802564
SFTA2	21	Inverse variance weighted	0.0350441169275554	0.0120839526600191	1.03566539816712	1.01142433462749	1.06048745342449	0.0037309821226757	0.00431367807802564
SNX7	21	Inverse variance weighted	0.0317356824627802	0.0109432452510868	1.03224462888558	1.01034001404627	1.0546241453863	0.00373133153749218	0.00431367807802564
ARPC1B	21	Inverse variance weighted	0.0313994585025544	0.0108366415088257	1.03189762184784	1.01021142552101	1.05404935548622	0.00376117678361491	0.00433049140677835
PTP4A2	21	Inverse variance weighted	0.0321427797779976	0.0111006139124262	1.03266493845029	1.0104396937935	1.05537904107959	0.00378451582375854	0.00433049140677835
CDCP1	21	Inverse variance weighted	0.0313570844658825	0.0108300562826079	1.03185389710658	1.01018165806629	1.05399108810997	0.00378704680929335	0.00433049140677835
RNF149	21	Inverse variance weighted	0.0315923451444135	0.010911976348941	1.03209668031211	1.01026	1.05440836566623	0.00378917998093106	0.00433049140677835
BPIFA1	21	Inverse variance weighted	0.0337577171087985	0.0116848303740535	1.03433397494153	1.01091458375071	1.05829591234997	0.0038644360446946	0.00439830395265692
SERPINB1	21	Inverse variance weighted	0.0316354162126689	0.0109520928003785	1.03214113477601	1.01022119752388	1.05453669424862	0.00387050747833809	0.00439830395265692
SPTLC1	21	Inverse variance weighted	0.0315131489992336	0.0109218471033962	1.03201494547016	1.01015757009162	1.05434526177651	0.00391001761381035	0.00441988447896339
ASAP2	21	Inverse variance weighted	0.0357611945737882	0.0123946838095983	1.03640831700654	1.01153361946184	1.06189471006588	0.0039115977638826	0.00441988447896339
ALKBH2	21	Inverse variance weighted	0.0303802085213313	0.0105362098941906	1.0308463960381	1.00977672002212	1.05235570513199	0.00393395570916694	0.00443262615117402
HSD17B7	21	Inverse variance weighted	0.0345680163808859	0.0119995514603623	1.0351724346643	1.01111015999168	1.05980734037686	0.00396697824741672	0.00444910013269033
BTG2	21	Inverse variance weighted	0.0325909527628243	0.0113144548619793	1.03312785470361	1.01046904216143	1.05629476968574	0.00397082186842612	0.00444910013269033
SNAI2	21	Inverse variance weighted	0.0373782036110562	0.0130044759844809	1.03808555430992	1.01196039090915	1.06488517509937	0.00404979523138955	0.00452491087306095
PVR	21	Inverse variance weighted	0.0305907700084826	0.0106477443427407	1.03106347544176	1.00976859535899	1.05280744051273	0.00406618229293746	0.00453056522889968
PRKG1	21	Inverse variance weighted	0.0314864741954658	0.0109714453666058	1.03198741704116	1.01003243204869	1.05441963558646	0.0041065807292443	0.00455075350243134
SMAD1	21	Inverse variance weighted	0.0318765698849028	0.0111090860496266	1.03239006941547	1.01015396641249	1.05511564659091	0.00411232813032628	0.00455075350243134
NRG4	21	Inverse variance weighted	0.0307770414145566	0.0107276506324228	1.03125555097361	1.00979854056976	1.0531684971676	0.00411843191970036	0.00455075350243134
A1BG	21	Inverse variance weighted	0.0319258538686074	0.0111388419785544	1.03244095096464	1.01014483704889	1.05522918905657	0.00415466457280039	0.00457814277994533
SCAND1	21	Inverse variance weighted	0.0309372290006389	0.0108020589368833	1.0314207585427	1.00981302856572	1.05349084539323	0.00418311848441788	0.00459119341810027
CTSV	21	Inverse variance weighted	0.0315203937391905	0.0110101985905279	1.03202242217715	1.00998997443483	1.05453549721856	0.0041986772153948	0.00459119341810027
WFDC8	21	Inverse variance weighted	0.0316944751662006	0.0110721735610674	1.0322020937514	1.01004311189476	1.05484721374525	0.00420267940251831	0.00459119341810027
CHST12	21	Inverse variance weighted	0.0315280134998973	0.0110168454232959	1.03203028597101	1.00998451239199	1.05455727102084	0.004212419961107	0.00459119341810027
IK	21	Inverse variance weighted	0.0308980915587774	0.0108199514600567	1.03138039216265	1.00973809636539	1.05348655969959	0.00429476151946486	0.00463166559634966
ARFGAP2	21	Inverse variance weighted	0.0315565891190905	0.0110511301951483	1.03205977729683	1.00994550498447	1.05465827478518	0.00429680594915612	0.00463166559634966
NMES1	21	Inverse variance weighted	0.031015360826066	0.0108628026620926	1.03150134847763	1.00977170192862	1.05369860323773	0.00430111479253878	0.00463166559634966
CDH5	21	Inverse variance weighted	0.031587537276738	0.0110644870467994	1.03209171813977	1.00995032115178	1.05471852658841	0.0043056100622857	0.00463166559634966
C19orf80	21	Inverse variance weighted	0.0336813150722933	0.011798456337518	1.03425495273819	1.01061225539321	1.0584507575037	0.00430744900460518	0.00463166559634966
SEPT10	21	Inverse variance weighted	0.0338388499139851	0.011867107457972	1.03441789676278	1.01063547816088	1.05875996664031	0.00435158737770207	0.00466626829374483
WSCD2	21	Inverse variance weighted	0.0312396235260633	0.0109597182977999	1.03173270169607	1.00980634582499	1.05413515388381	0.00436637460001337	0.00466626829374483
SF3B4	21	Inverse variance weighted	0.0337300628965764	0.0118415060407124	1.03430537164578	1.01057624833035	1.05859167339703	0.00439312984957845	0.00466626829374483
FASLG	21	Inverse variance weighted	0.030031773022667	0.0105439320039349	1.03048727512892	1.00940966138805	1.05200501324942	0.00439601317708512	0.00466626829374483
CCL4L1	21	Inverse variance weighted	0.0332234490899038	0.0116654419266365	1.03378151097292	1.01041302500844	1.05769045526756	0.0043991719329178	0.00466626829374483
MAD2L1	21	Inverse variance weighted	0.0315834137543491	0.0110925331917366	1.03208746229524	1.00989064094476	1.0547721571422	0.00440962353758886	0.00466626829374483
HIPK3	21	Inverse variance weighted	0.0308243568326801	0.010841932311766	1.03130434641558	1.00962014848214	1.05345426845398	0.00446814584411736	0.00468635068247296
HNRNPDL	21	Inverse variance weighted	0.0307979884741505	0.0108359840725263	1.03127715297134	1.0096052972712	1.05341420960769	0.00448039649807589	0.00468635068247296
MAP2K2	21	Inverse variance weighted	0.031906737681217	0.01122654984693	1.0324212148186	1.00995189396502	1.05539043114505	0.00448204323884683	0.00468635068247296
CD1A	21	Inverse variance weighted	0.0305390732311847	0.0107468262000785	1.03101017416065	1.00952032659644	1.05295748011986	0.00448760895860376	0.00468635068247296
TXNDC12	21	Inverse variance weighted	0.0308935338791098	0.0108731141487873	1.03137569147192	1.00962828670542	1.05359153558418	0.00449332036518838	0.00468635068247296
YEATS4	21	Inverse variance weighted	0.0310142908524994	0.0109171347828873	1.03150024479904	1.00966309578594	1.05380969103585	0.00449889665517404	0.00468635068247296
ANGPTL1	21	Inverse variance weighted	0.0309450141286942	0.0109026425835262	1.03142878831664	1.00962182966603	1.05370675842087	0.00453539632063913	0.0047121000733913
DDX19A	21	Inverse variance weighted	0.0317469529753896	0.0111959529486542	1.03225626287725	1.00985109086456	1.05515852969674	0.00457434178740356	0.00472712961513373
NANOG	21	Inverse variance weighted	0.0300748147814831	0.0106094850045451	1.03053163006823	1.00932341896865	1.05218547455904	0.00458672803017541	0.00472712961513373
USO1	21	Inverse variance weighted	0.0309013967934519	0.0109070013992275	1.03138380112252	1.0095691685449	1.05366980129865	0.0046088767018569	0.00472712961513373
BATF3	21	Inverse variance weighted	0.0336987562510247	0.0118945355810821	1.03427299152098	1.01043958264763	1.05866856302956	0.00460947491150205	0.00472712961513373
PXDNL	21	Inverse variance weighted	0.0304920051844716	0.0107652979861716	1.03096164766764	1.00943626456532	1.0529460415406	0.00461949788196869	0.00472712961513373
IL17A	21	Inverse variance weighted	0.0305536019010594	0.0107873799580432	1.03102515347592	1.00945475362147	1.05305647755527	0.00462076919879322	0.00472712961513373
EGLN1	21	Inverse variance weighted	0.030660624149995	0.0108312195614307	1.03113550201132	1.00947604993581	1.05325968216458	0.00464370010886083	0.00473846949883758
IL22RA2	21	Inverse variance weighted	0.0319956822437519	0.0113174972068957	1.03251304715583	1.00986169690376	1.0556724706122	0.00469718399863324	0.00476344928192303
SNAPIN	21	Inverse variance weighted	0.0306600918157471	0.0108479179092112	1.03113495310273	1.0094424742145	1.05329359390938	0.00470807181921826	0.00476344928192303
C10orf35	21	Inverse variance weighted	0.0307915501779093	0.010895707316562	1.0312705133249	1.0094806229008	1.05353074395556	0.00471294652806281	0.00476344928192303
CHFR	21	Inverse variance weighted	0.0308432792291078	0.0109166669468895	1.03132386134989	1.00949137208512	1.05362852660415	0.00472306933009847	0.00476344928192303
SERPINI2	21	Inverse variance weighted	0.0322926696306563	0.0114327675573665	1.03281973604676	1.00993345770082	1.05622464434059	0.00473438810130692	0.00476344928192303
RCN3	21	Inverse variance weighted	0.0306318150465177	0.0108469721577397	1.03110579634985	1.00941580197113	1.05326185818583	0.00474288531780344	0.00476344928192303
LRRTM2	21	Inverse variance weighted	0.0312403046049652	0.0110647330326381	1.03173340438768	1.00959920752103	1.05435286577047	0.00475154065871822	0.00476344928192303
PDIA6	21	Inverse variance weighted	0.0303271879821666	0.0107422631583186	1.03079174145531	1.00931547362544	1.05272498244367	0.00475520006602362	0.0135102078411903
HAAO	21	Inverse variance weighted	0.0319674314189275	0.0113238607845916	1.03248387822263	1.00982057270183	1.05565581411899	0.00475743120902237	0.0135102078411903
APBB1	21	Inverse variance weighted	0.0304101566595804	0.0107895475258247	1.03087726843077	1.00930567454913	1.05290990565569	0.00482511607548736	0.0135102078411903
TYK2	21	Inverse variance weighted	0.0306718763517668	0.0108864793941105	1.03114710462132	1.0093780779024	1.05338561897294	0.00484099052076283	0.0135102078411903
POFUT1	21	Inverse variance weighted	0.0307835762974978	0.0109267698810927	1.03126229012994	1.00941111598436	1.05358648642079	0.00484349594033988	0.0135102078411903
PPP1R8	21	Inverse variance weighted	0.034047769076247	0.0120923586402589	1.0346340290595	1.01040045880981	1.05944882027156	0.0048679675614686	0.0135102078411903
APCS	21	Inverse variance weighted	0.0312981469883776	0.0111183125774421	1.03179308403283	1.00955158229151	1.05452458985951	0.00487759085905119	0.0135102078411903
GRID1	21	Inverse variance weighted	0.0313518936822588	0.0111453859575526	1.03184854099017	1.00955227168309	1.05463723019362	0.00490827059183657	0.0135102078411903
SGK3	21	Inverse variance weighted	0.0309348508944963	0.0110027202825368	1.03141830571758	1.00941355049529	1.05390275457203	0.00493013004036102	0.0135102078411903
KRT7	21	Inverse variance weighted	0.0306136117873142	0.0108938042933782	1.0310870270346	1.00930477814815	1.0533393681834	0.00495129403468194	0.0135102078411903
MICALL2	21	Inverse variance weighted	0.0305796901377123	0.0108824619030475	1.03105205145498	1.00929297887445	1.05328022195799	0.00495418933417023	0.0135102078411903
ERCC4	21	Inverse variance weighted	0.0297060714723858	0.0105729258525821	1.03015169847775	1.00902360626486	1.0517221948899	0.00495975829505122	0.0135102078411903
CYB5A	21	Inverse variance weighted	-0.0309016	0.0110046261249603	0.96957099687279	0.948882176235565	0.990710903335083	0.00498419784806027	0.0135102078411903
ADSS	21	Inverse variance weighted	0.0335138244699751	0.0119435745224374	1.03408173925942	1.01015564041918	1.05857454107375	0.00501586804832634	0.0135102078411903
CD4	21	Inverse variance weighted	0.0314841978382718	0.0112233668710059	1.03198506787185	1.00953153727296	1.05493799944808	0.0050279680691242	0.0135102078411903
TLR1	21	Inverse variance weighted	0.0302136481797258	0.0107727307413708	1.03067471220849	1.00914061854385	1.05266832279419	0.00503725651033839	0.0135102078411903
SEL1L2	21	Inverse variance weighted	0.0305546656286971	0.0109036344971034	1.03102625020646	1.00922584011933	1.05329757360265	0.00507481681033944	0.0135102078411903
SERPINE2	21	Inverse variance weighted	0.0311677538201258	0.0111277287539149	1.03165855403471	1.00940132285836	1.05440655565927	0.00509589121839157	0.0135102078411903
SYT4	21	Inverse variance weighted	0.0307710748705415	0.0109940162798926	1.03124939796033	1.00926546405996	1.05371218838254	0.00512781314207447	0.0135102078411903
FKBP2	21	Inverse variance weighted	0.0304270538893638	0.0108734558205531	1.03089468754802	1.00915674933593	1.05310087606713	0.00513743853322421	0.0135102078411903
PTRH2	21	Inverse variance weighted	0.0339071804876923	0.0121178306635936	1.03448858154605	1.01020798196039	1.05935277136934	0.00514005373516096	0.0135102078411903
PCYOX1L	21	Inverse variance weighted	0.0320523867382598	0.0114777696889888	1.03257159694625	1.00960176209986	1.05606402726807	0.00522923993845412	0.0135102078411903
MAP3K3	21	Inverse variance weighted	0.0308417917056136	0.0110471818789215	1.03132232723256	1.0092316666074	1.05389652132481	0.00524117941265868	0.0135102078411903
FAM171A2	21	Inverse variance weighted	0.0303639042251638	0.0108819947984824	1.03082958895017	1.00907613499838	1.05305199934878	0.00526611044906768	0.0135102078411903
ARPC5	21	Inverse variance weighted	0.0350978455451321	0.0125844530640316	1.03572104453212	1.01048692388932	1.06158531765842	0.0052873582387963	0.0135102078411903
MAPRE2	21	Inverse variance weighted	0.0309736599859957	0.0111076500599225	1.03145833490172	1.00924514059167	1.05416043520855	0.00529530742566899	0.0135102078411903
CD58	21	Inverse variance weighted	0.0319021746896097	0.011444396000804	1.03241650390001	1.00951615188419	1.05583633856251	0.00531032652320755	0.0135102078411903
RAD23B	21	Inverse variance weighted	0.0299470547755773	0.0107441898438937	1.03039997775122	1.00892806218643	1.05232885667672	0.0053152694318886	0.0135102078411903
C17orf67	21	Inverse variance weighted	0.0331481645279044	0.0118940251444914	1.0337036861142	1.00988440645074	1.05808477075264	0.00532051534276084	0.0135102078411903
HS6ST3	21	Inverse variance weighted	0.0310967663626538	0.0111606202094577	1.0315853218163	1.00926460395437	1.0543996807352	0.00533145334305803	0.0135102078411903
PPARA	21	Inverse variance weighted	0.0303083864550942	0.0108829238870333	1.03077236117867	1.00901827745896	1.05299545539011	0.0053536166177547	0.0135102078411903
AHCYL1	21	Inverse variance weighted	0.0305618761999885	0.0109760401303898	1.03103368452154	1.00908990204341	1.05345465896093	0.0053623991234355	0.0135102078411903
MSRA	21	Inverse variance weighted	0.0322177170072622	0.0115869813933842	1.03274232639912	1.00955257078397	1.05646475835135	0.00542735971623163	0.0135102078411903
VTI1A	21	Inverse variance weighted	0.0295865906689372	0.0106453558804501	1.0300286224779	1.00875983792394	1.0517458400279	0.00544769275686599	0.0135102078411903
LYPD3	21	Inverse variance weighted	0.0307233193488473	0.0110598700560333	1.03120015128325	1.00908701251316	1.05379787750733	0.00547098346676045	0.0135102078411903
AKT2	21	Inverse variance weighted	0.0325818961312303	0.0117329671013599	1.03311849808761	1.00963136654595	1.05715201256302	0.00548711424913544	0.0135102078411903
IFNA1	21	Inverse variance weighted	0.0333689963469349	0.0120241685153135	1.03393198598656	1.00984981932236	1.05858844670928	0.00551744878719831	0.0135102078411903
KIAA1467	21	Inverse variance weighted	0.0338149268611873	0.0121858939533635	1.03439315062482	1.00998004649512	1.05939636507929	0.00552146470752891	0.0135102078411903
FSTL5	21	Inverse variance weighted	0.030758966973194	0.0110882206975268	1.03123691177407	1.00906691207043	1.05389400394005	0.0055367951931499	0.0135102078411903
CINP	21	Inverse variance weighted	0.0372199352783484	0.0134248040619416	1.03792127124077	1.01096702098858	1.06559417164829	0.00556317716151272	0.0135102078411903
COL4A3BP	21	Inverse variance weighted	0.0304870415160356	0.01100353083028	1.03095653032855	1.00896002392661	1.05343258624923	0.00559428267394385	0.0135102078411903
HEPACAM2	21	Inverse variance weighted	0.029810795443172	0.0107645922379005	1.03025958570322	1.00875025627788	1.0522275531804	0.00561703123418069	0.0135102078411903
UMODL1	21	Inverse variance weighted	0.0298865465786949	0.0107945041406626	1.03033763199273	1.00876753006958	1.05236895940452	0.00562835840076721	0.0135102078411903
C19orf18	21	Inverse variance weighted	0.0361761399890198	0.013067685230609	1.03683845912256	1.01061946743731	1.06373766284325	0.00563380883625318	0.0135102078411903
IL21R	21	Inverse variance weighted	0.0371160375461044	0.0134150902202823	1.03781343917629	1.01088123537978	1.06546317889686	0.00566202692357786	0.0135102078411903
ALDOA	21	Inverse variance weighted	0.030426606174893	0.011000031610013	1.03089422600165	1.00890596845523	1.05336169913906	0.0056740328865245	0.0135102078411903
MESDC2	21	Inverse variance weighted	0.0301812613608843	0.0109115926983876	1.03064133247384	1.00883332525313	1.05292076462375	0.00567517890030275	0.0135102078411903
GBP1	21	Inverse variance weighted	0.0305476294268794	0.0110463263366839	1.0310189957232	1.00893652422813	1.05358478359708	0.00568511624975932	0.0135102078411903
TMCO5A	21	Inverse variance weighted	0.0331017715297492	0.0119730312167492	1.03365573061341	1.00968119281311	1.05819953569018	0.00569761582204689	0.0135102078411903
AGO1	21	Inverse variance weighted	0.0301872000969445	0.0109205421545332	1.03064745319886	1.00882162063706	1.05294548714618	0.00570523438710609	0.0135102078411903
VAMP7	21	Inverse variance weighted	0.0337756499570443	0.0122187627605019	1.03435252366205	1.0098753172308	1.05942300495057	0.0057054738412459	0.0135102078411903
ACADS	21	Inverse variance weighted	0.0301905787262986	0.0109307099444093	1.03065093538048	1.00880492453649	1.05297002895651	0.00574491567834035	0.0135102078411903
LY86	21	Inverse variance weighted	0.032197518451142	0.0116573993458408	1.03272146670595	1.00939285429017	1.05658923902853	0.00574517771593084	0.0135102078411903
PLXDC2	21	Inverse variance weighted	0.0291222572536094	0.0105442985677231	1.02955045679248	1.00849128019245	1.05104938823004	0.00574667600552627	0.0135102078411903
TACO1	21	Inverse variance weighted	0.0300058442901817	0.0108693355347162	1.03046055624643	1.00873991864334	1.05264889230099	0.00576959970082223	0.0135102078411903
PRLH	21	Inverse variance weighted	0.0337524371660147	0.0122265177932045	1.03432851373174	1.00983652598356	1.05941451590545	0.00576965611645147	0.0135102078411903
PAEP	21	Inverse variance weighted	0.0305715050522322	0.0110759910627095	1.03104361224034	1.00890195135283	1.05367120057224	0.00577730980705068	0.0135102078411903
CDH6	21	Inverse variance weighted	0.0294928286404441	0.0106974341455977	1.02993204943236	1.00856230635162	1.0517545815143	0.00583343064794748	0.0135102078411903
FAM173A	21	Inverse variance weighted	0.029467578423852	0.0106954493384413	1.02990604375337	1.00854076369631	1.05172393337103	0.00586650458010704	0.0135102078411903
OMP	21	Inverse variance weighted	0.0310289258450409	0.0112688775015616	1.0315153409079	1.00898202439176	1.05455188775018	0.00589606250097935	0.0135102078411903
EDDM3A	21	Inverse variance weighted	0.0298504938777101	0.0108409901379883	1.03030048620778	1.00863925804467	1.05242690428074	0.00589646358905671	0.0135102078411903
ELAVL1	21	Inverse variance weighted	0.0294847669868629	0.0107180799756152	1.02992374651044	1.00851336455157	1.05178866330417	0.00594249994279817	0.0135102078411903
DKK2	21	Inverse variance weighted	0.0320110721338845	0.0116373460449424	1.03252893754046	1.00924434128725	1.05635074009794	0.00594645776525863	0.0135102078411903
TNFRSF13B	21	Inverse variance weighted	0.0325883352793764	0.0118496031999716	1.03312515051209	1.00940708407825	1.05740052101506	0.00595657031278179	0.0135102078411903
PRSS35	21	Inverse variance weighted	0.0306335166996732	0.0111391772819591	1.03110755093577	1.0088395695018	1.05386705055771	0.00595825442129537	0.0135102078411903
CPVL	21	Inverse variance weighted	0.0292944556274624	0.0106527155580723	1.02972775897208	1.00845063989463	1.05145380016661	0.00596040092164371	0.0135102078411903
RAB7B	21	Inverse variance weighted	0.0287701320333403	0.0104735908954519	1.02918798993171	1.00827595178853	1.05053375193643	0.00601575307810002	0.0135102078411903
SLC3A2	21	Inverse variance weighted	0.0296337359941929	0.010797581525927	1.03007718465706	1.00850645219311	1.05210928898236	0.00606070278232578	0.0135102078411903
CCPG1	21	Inverse variance weighted	0.0293917416397686	0.0107114787737737	1.02982794195263	1.00843259898451	1.05167721778764	0.00607051378597942	0.0135102078411903
TEK	21	Inverse variance weighted	0.0305214905499789	0.0111302520988943	1.0309920463968	1.00874420558932	1.05373056305438	0.00610272791619795	0.0135102078411903
JUN	21	Inverse variance weighted	0.0297484369680372	0.010849118806456	1.03019534228954	1.0085202566271	1.0523362682119	0.00610637164081439	0.0135102078411903
PDK1	21	Inverse variance weighted	0.0294529533479383	0.0107421551049985	1.02989098140944	1.00843369424271	1.05180483322209	0.00611015862565458	0.0135102078411903
VAMP8	21	Inverse variance weighted	0.0356751074627604	0.0130130936575573	1.03631909944898	1.01022132841827	1.06309107288821	0.0061163492460439	0.0135102078411903
BCAM	21	Inverse variance weighted	0.0306935778295636	0.0111994761379197	1.03116948228013	1.00878093278145	1.05405491582208	0.00613222257857164	0.0135102078411903
NDST1	21	Inverse variance weighted	0.0304628482091982	0.0111216588281598	1.03093158838259	1.00870204143672	1.05365102504528	0.00616158458495863	0.0135102078411903
ADH6	21	Inverse variance weighted	0.0300985551981218	0.0109912819643569	1.0305560956089	1.00859234665876	1.05299814113697	0.00617384435537779	0.0135102078411903
ERAP2	21	Inverse variance weighted	0.0249627598264896	0.00911746393594542	1.0252769383224	1.00711774207592	1.04376356044427	0.00618317337894117	0.0135102078411903
ALK	21	Inverse variance weighted	0.0296116308912469	0.0108169406270999	1.03005441494651	1.00844589426666	1.05212595319492	0.00619036670773916	0.0135102078411903
GMPR2	21	Inverse variance weighted	0.0301092925346502	0.0110003956824702	1.03056716109592	1.00858515990819	1.05302825755038	0.00619815723500226	0.0135102078411903
AXL	21	Inverse variance weighted	0.029775760977601	0.0108807052214916	1.0302234917415	1.00848537719018	1.05243017592699	0.0062084260899148	0.0135102078411903
SPINK2	21	Inverse variance weighted	0.0303329632949178	0.011086114350713	1.03079769461719	1.0086413015098	1.05344078775836	0.00621679401047346	0.0135102078411903
PRR27	21	Inverse variance weighted	0.0290007803738916	0.0105993490502823	1.02942539781152	1.0082599832005	1.05103511724781	0.00621738864218243	0.0135102078411903
GP6	21	Inverse variance weighted	0.0306317404998959	0.0111962134245959	1.0311057194844	1.00872500508421	1.05398299773949	0.00622095868011739	0.0135102078411903
NMT2	21	Inverse variance weighted	0.0298399210292494	0.0109075091078728	1.03028959305445	1.00849710033037	1.05255299713661	0.00622434399638088	0.0135102078411903
TRIP10	21	Inverse variance weighted	0.030188192571576	0.0110371280361625	1.03064847609082	1.00859212383322	1.05318716671237	0.00623519958756131	0.0135102078411903
GEM	21	Inverse variance weighted	0.0335487861496343	0.0122679795585782	1.03411789312593	1.0095488483066	1.05928486638066	0.00624442262207544	0.0135102078411903
LRTM2	21	Inverse variance weighted	0.0296098647232168	0.0108408284909778	1.03005259569894	1.00839689872026	1.05217335679299	0.00630795459400973	0.0135102078411903
IFIT2	21	Inverse variance weighted	0.0363699226977143	0.0133171719546509	1.03703939995645	1.01032116521366	1.06446420612658	0.00631320262838855	0.0135102078411903
RUFY1	21	Inverse variance weighted	0.0296230272277735	0.010846878078617	1.03006615386016	1.00839821499448	1.05219968218019	0.00631388826321296	0.0135102078411903
CLEC4A	21	Inverse variance weighted	0.0292623876389206	0.0107228348533061	1.02969473820356	1.0082797201747	1.0515645933059	0.00635308123199331	0.0135102078411903
GHRH	21	Inverse variance weighted	0.0298310885204066	0.0109378315519581	1.0302804930527	1.00842825813058	1.05260625712004	0.00638489292217452	0.0135102078411903
DPP7	21	Inverse variance weighted	0.0326260441502695	0.0119699310968084	1.03316410922955	1.0092071062218	1.05768981413166	0.00641717372422125	0.0135102078411903
PAPPA2	21	Inverse variance weighted	0.0292208808649053	0.0107242697692887	1.02965199978373	1.00823503500492	1.05152390449659	0.00643515221587022	0.0135102078411903
TMPRSS11B	21	Inverse variance weighted	0.0288003275663971	0.0105711868116656	1.02921906728088	1.00811353921443	1.05076645362781	0.00644149987408905	0.0135102078411903
CRYAA	21	Inverse variance weighted	0.0310597714835648	0.0114050475916017	1.03154715914796	1.00874388457456	1.05486591573738	0.0064626382463814	0.0135102078411903
MADCAM1	21	Inverse variance weighted	0.0343270588649923	0.0126064501294175	1.03492303213483	1.00966482224396	1.06081311227891	0.00646967931108231	0.0135102078411903
MANSC4	21	Inverse variance weighted	0.0299244991564381	0.0109920776703925	1.03037673670387	1.00841523763493	1.05281651835259	0.00648155883839137	0.0135102078411903
BID	21	Inverse variance weighted	0.0299959701525102	0.0110203591568454	1.03045038138727	1.00843141202164	1.0529501320992	0.00649139369384764	0.0135102078411903
TGFB1	21	Inverse variance weighted	0.0297124033867111	0.0109181072775343	1.0301582213307	1.00834756132766	1.05244064812131	0.00650084591719826	0.0135102078411903
EIF4G2	21	Inverse variance weighted	0.0298448358032687	0.0109668643688127	1.03029465670742	1.00838473829285	1.05268062806756	0.0065013024119282	0.0135102078411903
DCK	21	Inverse variance weighted	0.0300277057874634	0.0110356850345719	1.03048308390332	1.00843312324509	1.05301517942387	0.00650917767648771	0.0135102078411903
HBEGF	21	Inverse variance weighted	0.030855753375735	0.0113526599648606	1.0313367263152	1.00864166530368	1.05454244022956	0.00656914147914879	0.0135102078411903
SNUPN	21	Inverse variance weighted	0.029890469822217	0.0109978976838263	1.0303416742661	1.00836941975583	1.05279270169312	0.00657106237229306	0.0135102078411903
NDC80	21	Inverse variance weighted	0.0297505888335131	0.0109491312135943	1.03019755913372	1.0083247512837	1.05254483686325	0.00658439057887544	0.0135102078411903
C1QL4	21	Inverse variance weighted	0.0309517438058449	0.0113943857843392	1.03143572952275	1.00865599600867	1.05472992610553	0.00659955294728045	0.0135102078411903
PPBP	21	Inverse variance weighted	0.0299751883186752	0.0110354368377671	1.03042896696118	1.00838065482318	1.0529593669554	0.00660227322225722	0.0135102078411903
F10	21	Inverse variance weighted	0.0303413939561397	0.0111724911618871	1.03080638495997	1.00847905656355	1.05362803159739	0.00661311738390778	0.0135102078411903
RBL1	21	Inverse variance weighted	0.0290571631273892	0.0106996782055292	1.02948344128628	1.00811857216228	1.05130109210213	0.00661349389357297	0.0135102078411903
RAB2B	21	Inverse variance weighted	0.0306161333543215	0.0112798827723048	1.03108962699291	1.00854385528201	1.05413940437434	0.00664311446399299	0.0135102078411903
CASS4	21	Inverse variance weighted	0.0293541537100669	0.0108192706960174	1.02978923357983	1.00818167157401	1.05185989340721	0.00666497300753709	0.0135102078411903
ADAMTS1	21	Inverse variance weighted	0.0290137862480158	0.0107080537094399	1.02943878647573	1.0080582956646	1.05127274846932	0.00673787351088664	0.0135102078411903
RMDN1	21	Inverse variance weighted	0.0290403811674879	0.0107376546317485	1.02946616468142	1.0080266200591	1.0513617032869	0.00683997108017418	0.0135102078411903
NAALADL1	21	Inverse variance weighted	0.0298751063377293	0.011052879848161	1.03032584474937	1.00824526835837	1.05288998587313	0.00687322330741105	0.0135102078411903
LNX1	21	Inverse variance weighted	0.0295225580010388	0.010925772956648	1.0299626691088	1.00814100220468	1.05225667583982	0.00689025254579455	0.0135102078411903
SARS	21	Inverse variance weighted	0.0384407275229703	0.01422628789504	1.03918913121858	1.01061312714563	1.06857314776124	0.0068904856516904	0.0135102078411903
C1D	21	Inverse variance weighted	0.0292467866826918	0.0108241747087583	1.02967867410633	1.00806374249653	1.05175707369816	0.00689263168185994	0.0135102078411903
ERLIN1	21	Inverse variance weighted	0.0291880113469849	0.0108074129423113	1.02961815617509	1.00803761153121	1.05166070729749	0.00691854210531788	0.0135102078411903
PYCR2	21	Inverse variance weighted	0.0294595651933915	0.0109090958863649	1.02989779091195	1.00811045019857	1.05215600087906	0.00692438897370364	0.0135102078411903
PCDHA7	21	Inverse variance weighted	0.029133831700352	0.0107911847738624	1.02956237333838	1.00801505952605	1.0515702821866	0.00693852089995179	0.0135102078411903
SYK	21	Inverse variance weighted	0.0292369572260109	0.0108358836123886	1.02966855297415	1.00803069980961	1.05177087283564	0.00697237368115022	0.0135102078411903
PACAP	21	Inverse variance weighted	0.0315979101748012	0.0117177182813555	1.03210242397748	1.00866853839595	1.05608073716088	0.00700529573988463	0.0135102078411903
RPP30	21	Inverse variance weighted	0.0292063129556591	0.0108361685730093	1.0296370000161	1.00799924692689	1.05173922999869	0.00703333116767777	0.0135102078411903
GDF9	21	Inverse variance weighted	0.0373071504454454	0.0138449957491154	1.03801179766546	1.01022285878678	1.06656514720589	0.00704666862188494	0.0135102078411903
ENTPD6	21	Inverse variance weighted	0.0293891172698341	0.0109299752042042	1.02982523930669	1.00799818179182	1.05212493699925	0.00716975788516114	0.0135102078411903
FCGR3B	21	Inverse variance weighted	0.0302306556484187	0.0112492474041256	1.03069224152546	1.00821569585029	1.0536698655984	0.00720216216970131	0.0135102078411903
CLTA	21	Inverse variance weighted	0.0300068827212215	0.0111674174151152	1.03046162630921	1.0081517909656	1.05326516583262	0.00720963317961946	0.0135102078411903
APOC2	21	Inverse variance weighted	0.0324469684093277	0.0120768095141671	1.03298	1.00881504746683	1.05772197469169	0.00721580785644379	0.0135102078411903
UNC93B1	21	Inverse variance weighted	0.0291047832831426	0.0108376526494519	1.02953246661539	1.00789397853263	1.05163551166195	0.00724160339562167	0.0135102078411903
RAB1A	21	Inverse variance weighted	0.0331968656043486	0.0123693746143715	1.03375402982233	1.00899308836228	1.05912261094717	0.0072791727306371	0.0135102078411903
LILRA4	21	Inverse variance weighted	0.0313316016323564	0.0116755958879594	1.03182760288052	1.00848321393941	1.05571236818834	0.00728533613954001	0.0135102078411903
MYL12B	21	Inverse variance weighted	0.0286695433896274	0.0106837271527834	1.02908447051421	1.00775938739121	1.0508608113242	0.00728608377968658	0.0135102078411903
F10	21	Inverse variance weighted	0.0302155714626896	0.0112605945789395	1.03067669448951	1.00817806525625	1.0536774059787	0.007289921467737	0.0135102078411903
PTP4A1	21	Inverse variance weighted	0.031072336600259	0.0115845583671668	1.03156012073982	1.00840170003172	1.0552503855034	0.00731352998433816	0.0135102078411903
WFDC10B	21	Inverse variance weighted	0.0391680008696075	0.0146182898845248	1.03994518066982	1.01057164176965	1.07017249851238	0.00737579224278616	0.0135102078411903
ORC6L	21	Inverse variance weighted	0.0292068411807525	0.0109072050791136	1.02963754389634	1.00785944377367	1.05188623111118	0.00741170404878307	0.0135102078411903
KIR2DL5A	21	Inverse variance weighted	0.0295265038993259	0.0110281356458381	1.02996673324475	1.00794273551804	1.05247196513167	0.00742005456239533	0.0135102078411903
B3GAT3	21	Inverse variance weighted	0.0299691944771698	0.011197822685875	1.03042279075178	1.00805372013401	1.05328823900331	0.00744308230632129	0.0135102078411903
GMFG	21	Inverse variance weighted	0.0317441080855004	0.01186475810567	1.03225332622602	1.00852531748622	1.05653959402882	0.00746188530780958	0.0135102078411903
ANXA11	21	Inverse variance weighted	0.0290204027894912	0.0108471713464959	1.02944559782269	1.00779013336985	1.0515663964013	0.00746425883351831	0.0135102078411903
TPM1	21	Inverse variance weighted	0.0291646871970087	0.0109102379167584	1.02959414148685	1.00781096856769	1.05184814339798	0.00751429564081098	0.0135102078411903
HFE2	21	Inverse variance weighted	0.0351247086433294	0.0131436147992476	1.03574886758195	1.00940719574833	1.06277795642421	0.00753157279488709	0.0135102078411903
CEL	21	Inverse variance weighted	0.030734271665873	0.0115061361580035	1.03121144537607	1.00821581084723	1.05473157000087	0.00755985907633183	0.0135102078411903
CLEC10A	21	Inverse variance weighted	0.0350568463443733	0.0131477332857699	1.03567858166757	1.00933054979485	1.06271441476032	0.0076673090144604	0.0135102078411903
KARS	21	Inverse variance weighted	0.0288542874842226	0.0108331048966456	1.02927460535558	1.00765051869345	1.05136274291164	0.00773257797212258	0.0135102078411903
LRTM1	21	Inverse variance weighted	0.0319423380902606	0.0119950546865816	1.0324579700904	1.0084676806065	1.05701896104603	0.00774568653623982	0.0135102078411903
LRP1	21	Inverse variance weighted	0.0295748968881548	0.0111108911893194	1.03001657761941	1.00782803022309	1.05269363259917	0.00777255678378357	0.0135102078411903
C21orf33	21	Inverse variance weighted	0.0331341575787344	0.0124520487648144	1.03368920718062	1.0087663432923	1.05922782232643	0.00779227867964121	0.0135102078411903
TMEM52B	21	Inverse variance weighted	0.0285709169358525	0.0107385721433407	1.02898298056712	1.0075516867772	1.0508701322148	0.00780043242768191	0.0135102078411903
MANBA	21	Inverse variance weighted	0.0280088153909462	0.010536696330857	1.02840475017139	1.00738401898809	1.04986411362516	0.00785555140519127	0.0135102078411903
CSPG4	21	Inverse variance weighted	0.0320909116628071	0.0120738826839123	1.03261137745538	1.00846170111457	1.05733936714881	0.00786342658950536	0.0135102078411903
ALDH5A1	21	Inverse variance weighted	0.0261835642694465	0.00985255365314405	1.02652936529262	1.00689622933758	1.04654532126048	0.00787130395644917	0.0135102078411903
XPNPEP1	21	Inverse variance weighted	0.029884489136912	0.0112467359060109	1.03033551213522	1.00787170701377	1.0532999985805	0.00787996980267164	0.0135102078411903
RGMA	21	Inverse variance weighted	0.0298251466200163	0.0112290011228262	1.03027437124682	1.00784693147145	1.05320088487873	0.0079054412719721	0.0135102078411903
CBX7	21	Inverse variance weighted	0.0291079796439062	0.0109643466010747	1.02953575737783	1.00764695002384	1.05190004861768	0.00793590404247376	0.0135102078411903
RECQL	21	Inverse variance weighted	0.0319246438141578	0.0120353587272861	1.03243970165563	1.00837017638284	1.05708376003187	0.00798813203541155	0.0135102078411903
SNRPD2	21	Inverse variance weighted	0.0297577658127533	0.0112273456739089	1.03020495286675	1.00778229414508	1.05312650467977	0.00803793796222131	0.0135102078411903
GNAS	21	Inverse variance weighted	0.0284068922683446	0.0107285625393675	1.02881421581704	1.00740620093053	1.05068	0.0081021809612228	0.0135102078411903
PCDHB7	21	Inverse variance weighted	0.0282605999249016	0.0106741388259249	1.02866371918296	1.00736628640869	1.05041141582737	0.00810709965452217	0.0135102078411903
DGCR6	21	Inverse variance weighted	0.0319407248502337	0.0120689356025841	1.03245630448922	1.00832003174433	1.05717032997497	0.00813237915578212	0.0135102078411903
PDIA3	21	Inverse variance weighted	0.0285140037402652	0.010776316307278	1.02892441952396	1.00741981519738	1.05088806585097	0.00814527035032627	0.0135102078411903
NXT1	21	Inverse variance weighted	0.0287610965761252	0.0108708465767542	1.02917869078968	1.00748208927454	1.05134253884181	0.00815199120442894	0.0135102078411903
GDF11	21	Inverse variance weighted	0.03248023889249	0.0122769117501448	1.03301347945185	1.00845301855876	1.05817210032679	0.00815375190059518	0.0135102078411903
CCBL2	21	Inverse variance weighted	0.0291995746520286	0.0110385196728744	1.02963006203274	1.00759275598345	1.05214935135853	0.00816321013799622	0.0135102078411903
NANP	21	Inverse variance weighted	0.0364320936487959	0.0137776835624894	1.03710387568649	1.00947241588584	1.06549166875461	0.00818641927221066	0.0135102078411903
SAR1A	21	Inverse variance weighted	0.0292749839390861	0.0110712398545574	1.02970770862925	1.00760411940755	1.05229617941016	0.00818752651015465	0.0135102078411903
PABPC4	21	Inverse variance weighted	0.029107110988711	0.011008524766011	1.02953486306663	1.00755882723307	1.05199022193117	0.00819200905391792	0.0135102078411903
LRRK2	21	Inverse variance weighted	0.0346565468359547	0.013110020663616	1.03526408300779	1.00900117544915	1.0622105777913	0.00820499347668761	0.0135102078411903
FAHD1	21	Inverse variance weighted	0.0292537425387091	0.0110664822842906	1.02968583642784	1.00759211230147	1.05226401516616	0.00820647913641463	0.0135102078411903
DPY30	21	Inverse variance weighted	0.033028275898491	0.0124948873351677	1.03357976422462	1.00857485194272	1.05920460633822	0.00820917702745344	0.0135102078411903
IL26	21	Inverse variance weighted	0.0246251955212351	0.0093191498466812	1.02493089983343	1.00637992740897	1.04382382917547	0.00823136245896245	0.0135102078411903
IL20RB	21	Inverse variance weighted	0.028138948610989	0.0106500068052047	1.02853858850125	1.00729138893763	1.05023396373108	0.00823808051353061	0.0135102078411903
PPBP	21	Inverse variance weighted	0.0295227543769209	0.0111768974491463	1.02996287136865	1.00764511114117	1.05277493501313	0.0082562051611653	0.0135102078411903
ARL8B	21	Inverse variance weighted	0.0287961955167245	0.0109027404924301	1.02921481450536	1.00745447141145	1.05144516646319	0.00826156789480397	0.0135102078411903
ZPLD1	21	Inverse variance weighted	0.0317365425507843	0.0120187641076845	1.03224551670718	1.00821331057951	1.05685056483695	0.0082763550516176	0.0135102078411903
SMR3A	21	Inverse variance weighted	0.0307169286394679	0.0116371944952233	1.03119356120382	1.00793937846487	1.05498424150048	0.00830167675740523	0.0135102078411903
CDH15	21	Inverse variance weighted	0.0290508983296169	0.0110162415483405	1.02947699180091	1.00748695301607	1.05194699889136	0.00836188992117113	0.0135102078411903
ITPRIPL1	21	Inverse variance weighted	0.0294241813752648	0.0111597998669484	1.02986134984054	1.00757955412903	1.05263588919507	0.00837359167006857	0.0135102078411903
RYK	21	Inverse variance weighted	0.0308515429743981	0.011705838945762	1.03133238398281	1.00793945024212	1.05526823659513	0.00839964154257378	0.0135102078411903
CD244	21	Inverse variance weighted	0.0342279519369856	0.0129922691870355	1.03482046917483	1.00880161273134	1.06151039997237	0.00842647662151883	0.0135102078411903
SLC26A11	21	Inverse variance weighted	0.0286339643491958	0.0108697801128317	1.02904785732756	1.00735611961772	1.05120669051208	0.00843177526482854	0.0135102078411903
FAM162A	21	Inverse variance weighted	0.0283908386396915	0.0107779378072397	1.02879769974823	1.00729254255358	1.05076198055041	0.00843451322678691	0.0135102078411903
AURKA	21	Inverse variance weighted	0.028616315537993	0.0108655759733154	1.02902969601647	1.00734664175305	1.05117947625355	0.00844681328539838	0.0135102078411903
TK1	21	Inverse variance weighted	0.0287201744316641	0.0109133990698261	1.02913657545235	1.00735684181854	1.05138720160156	0.00849730037259832	0.0135102078411903
HDGFRP3	21	Inverse variance weighted	0.0279750804798015	0.0106378693833854	1.0283700576137	1.00715029866642	1.05003689796519	0.00854442898869723	0.0135102078411903
GLUL	21	Inverse variance weighted	0.028869929604868	0.0109869823468856	1.02929070551905	1.0073624144818	1.05169633216154	0.00859772614548159	0.0135102078411903
SMIM13	21	Inverse variance weighted	0.0281343890348749	0.0107115142666399	1.02853389881197	1.00716537036433	1.05035579273607	0.00862538701941934	0.0135102078411903
POLR2K	21	Inverse variance weighted	0.0290365955311235	0.0110562632152467	1.02946226750425	1.0073935177039	1.05201447258715	0.00863294510245017	0.0135102078411903
KIAA1279	21	Inverse variance weighted	0.0292738821481742	0.0111554569848289	1.02970657410728	1.00743670239482	1.05246873201987	0.00868588964806526	0.0135102078411903
AAGAB	21	Inverse variance weighted	0.0287862198192531	0.0109710678364222	1.02920454742095	1.0073095118714	1.05157549685403	0.00869471033072497	0.0135102078411903
PSD	21	Inverse variance weighted	0.0299952341524335	0.0114398443785128	1.03044962297599	1.00760188791592	1.05381543864272	0.00874162787016019	0.0135102078411903
STX3	21	Inverse variance weighted	0.0282474082028636	0.0107744809306108	1.02865014942661	1.00715490043779	1.05060416173861	0.00874935639753284	0.0135102078411903
CDKN2D	21	Inverse variance weighted	0.0289829026311162	0.0110570337537443	1.02940699417356	1.00733790793786	1.05195957712217	0.00876160589906614	0.0135102078411903
ETNK1	21	Inverse variance weighted	0.0356209017130792	0.0135902323571185	1.03626292651774	1.00902452396398	1.06423662395886	0.00876551815765647	0.0135102078411903
CSNK1G2	21	Inverse variance weighted	0.02807772583756	0.0107130641136946	1.02847562044385	1.00710524348258	1.05029946839479	0.0087701437352258	0.0135102078411903
ANAPC10	21	Inverse variance weighted	0.0285339318078339	0.0108915361324026	1.02894492420362	1.00721240600086	1.05114636271021	0.00879745880673648	0.0135102078411903
RND1	21	Inverse variance weighted	0.0278786262594336	0.0106414451672242	1.02827087176507	1.00704610151047	1.04994298089689	0.00879772711867267	0.0135102078411903
CNTNAP5	21	Inverse variance weighted	0.0302943566945712	0.0115663751895974	1.03075789979073	1.0076534000099	1.05439216299033	0.00881428073973064	0.0135102078411903
CDYL2	21	Inverse variance weighted	0.0289410625308682	0.0110566549285683	1.02936392458275	1.00729650961523	1.05191478290455	0.00885701916586558	0.0135102078411903
CALY	21	Inverse variance weighted	0.0319534570835506	0.0122102500360926	1.03246945004746	1.00805362436887	1.05747664559881	0.00887226725906138	0.0135102078411903
NCK2	21	Inverse variance weighted	0.0290408020190723	0.0110974729507645	1.02946659793398	1.00731638998122	1.05210387401868	0.00887364302682207	0.0135102078411903
SRA1	21	Inverse variance weighted	0.0314760547235791	0.0120289054437026	1.0319766643333	1.00793068263147	1.05659630575793	0.00887839487927452	0.0135102078411903
MMAB	21	Inverse variance weighted	0.0278834872407943	0.0106588576536469	1.02827587018276	1.00701662822803	1.04998391839929	0.00889686203140406	0.0135102078411903
LGALS1	21	Inverse variance weighted	0.0342993583566123	0.0131157658405582	1.03489436463776	1.00862947842858	1.0618431930302	0.00891949808860041	0.0135102078411903
BCAR3	21	Inverse variance weighted	0.028368705415838	0.0108527889725659	1.02877492939044	1.00712248411867	1.05089288744108	0.00895007412812506	0.0135102078411903
MOB1A	21	Inverse variance weighted	0.0293713410027992	0.0112475729865899	1.02980693302095	1.0073529994589	1.05276136554679	0.00901857459441937	0.0135102078411903
SDSL	21	Inverse variance weighted	0.0283712493624804	0.0108677701598361	1.02877754654229	1.00709547428127	1.05092641889282	0.00903872244312393	0.0135102078411903
AIFM1	21	Inverse variance weighted	0.0283873329396328	0.0108739621800048	1.0287940930984	1.00709944951412	1.05095607638829	0.00903891984443619	0.0135102078411903
C1GALT1C1	21	Inverse variance weighted	0.0294525543225807	0.0112833362220492	1.0298905704569	1.00736419864551	1.05292067014314	0.00904707792278293	0.0135102078411903
F2	21	Inverse variance weighted	0.0307226513496223	0.011776613811763	1.03119946244257	1.00766975128956	1.05527860688585	0.00908643596080365	0.0135102078411903
ZFYVE27	21	Inverse variance weighted	0.0307836509673515	0.0118087163444611	1.03126236713415	1.00766781520881	1.05540938572772	0.00913771492289117	0.0135102078411903
AES	21	Inverse variance weighted	0.0279007613704778	0.0107049398200491	1.02829363290691	1.00694307145509	1.05009689768151	0.00915143579310291	0.0135102078411903
APOD	21	Inverse variance weighted	0.0285997998993679	0.0109745873724093	1.02901270107422	1.00711479942056	1.05138673325153	0.00916058473505362	0.0135102078411903
EIF4E2	21	Inverse variance weighted	0.0280829450597585	0.0107776834768873	1.02848098830064	1.00698295335488	1.05043798385243	0.00916982710211854	0.0135102078411903
MSMP	21	Inverse variance weighted	0.0309859755656273	0.0118933407933272	1.03147103798721	1.00770455613085	1.05579804689129	0.0091788107181439	0.0135102078411903
GPR68	21	Inverse variance weighted	0.0355017027683201	0.0136268864921301	1.03613941243193	1.00883177727192	1.06418622626854	0.00918021963824366	0.0135102078411903
CNEP1R1	21	Inverse variance weighted	0.0296515211191148	0.0113868443557961	1.03009550487138	1.00736026071987	1.05334386369177	0.00921385444074532	0.0135102078411903
ST6GALNAC1	21	Inverse variance weighted	0.0281462255800774	0.0108110351577749	1.02855	1.00698084999704	1.05057313119773	0.00922848488595557	0.0135102078411903
ITPA	21	Inverse variance weighted	0.0285269292956385	0.0109584170097646	1.02893771902947	1.00707333061749	1.05127680125579	0.00923585957603728	0.0135102078411903
KLHL12	21	Inverse variance weighted	0.0292255770743675	0.0112332959547079	1.02965683525655	1.00723435945663	1.05257846740104	0.00927651019792102	0.0135102078411903
CD81	21	Inverse variance weighted	0.0323451895450687	0.0124347887956435	1.03287398107537	1.00800487253906	1.05835665069281	0.00929022644062751	0.0135102078411903
KEAP1	21	Inverse variance weighted	0.0277013673509463	0.0106515236345662	1.02808861774626	1.00684772017694	1.0497776225323	0.00930350489776874	0.0135102078411903
CD300LB	21	Inverse variance weighted	0.0326731858869562	0.0125689809175243	1.03321281552798	1.00807037460507	1.05898233800342	0.00933570817063231	0.0135102078411903
WFDC11	21	Inverse variance weighted	0.0313370406122553	0.0120602750540649	1.03183321498537	1.00772861425138	1.05651439136516	0.00936678729712564	0.0135102078411903
PAK6	21	Inverse variance weighted	0.0282231841477342	0.0108722528067432	1.02862523165048	1.00693752253269	1.0507800568666	0.00943459660112337	0.0135102078411903
CA11	21	Inverse variance weighted	0.0279667020136007	0.0107735574345242	1.02836144148603	1.00687404799292	1.0503073909227	0.00943530946108629	0.0135102078411903
SERPINA9	21	Inverse variance weighted	0.0296417037890105	0.0114259325612863	1.03008539213341	1.00727319812058	1.05341422472716	0.00947980529949138	0.0135102078411903
LCAT	21	Inverse variance weighted	0.028437108037062	0.0109638724531763	1.02884530269909	1.00697211080867	1.05119361849646	0.00949464745624549	0.0135102078411903
RBM17	21	Inverse variance weighted	0.0287635821159313	0.0110934221694366	1.02918124885746	1.00704517596721	1.05180389944521	0.00951842140012866	0.0135102078411903
NPLOC4	21	Inverse variance weighted	0.0285400082473884	0.0110114146777829	1.02895117654426	1.00698189605745	1.05139975987355	0.00954595413646118	0.0135102078411903
SETMAR	21	Inverse variance weighted	0.0277839102910696	0.0107298290579955	1.02817348270593	1.00677630127249	1.05002542193682	0.00961409763967533	0.0135102078411903
BCL2L1	21	Inverse variance weighted	0.0283783866812243	0.0109595416514076	1.02878488928176	1.00692152886481	1.05112297043416	0.00961497245628103	0.0135102078411903
LGR4	21	Inverse variance weighted	0.0276215931197974	0.0106710837745926	1.02800660603848	1.00672880629542	1.04973412447349	0.00964082517124223	0.0135102078411903
AKR1C1	21	Inverse variance weighted	0.0277020602823109	0.0107021921880308	1.02808933014136	1.00674843233476	1.04988260900419	0.00964097030089638	0.0135102078411903
SEC13	21	Inverse variance weighted	0.036666526986812	0.0141701192834998	1.03734703591126	1.00893275422699	1.06656154080193	0.00966485966966092	0.0135102078411903
RIPPLY1	21	Inverse variance weighted	0.0276059905187451	0.0106736492761173	1.02799056658666	1.00670803670373	1.04972302441463	0.00969931660626272	0.0135102078411903
NIT2	21	Inverse variance weighted	0.0286373664799645	0.0110737290001611	1.02905135828889	1.00695694553097	1.05163056146142	0.00970790412782293	0.0135102078411903
LCMT1	21	Inverse variance weighted	0.0287016620511176	0.0111032380707981	1.02911752386077	1.00696344827119	1.0517590084681	0.00973842976099808	0.0135102078411903
C1R	21	Inverse variance weighted	0.0284135674983508	0.010992069041073	1.02882108341148	1.0068927586413	1.05122696790498	0.00974029205608136	0.0135102078411903
SNX17	21	Inverse variance weighted	0.0284692500327503	0.0110168471395678	1.02887837237183	1.0068999251871	1.05133656151361	0.00976176711119893	0.0135102078411903
SDC3	21	Inverse variance weighted	0.028874170342171	0.0111745069711037	1.0292950704798	1.00699649860907	1.05208741398545	0.00976809447669587	0.0135102078411903
CAPZA1	21	Inverse variance weighted	0.0271531079619065	0.0105095292527745	1.02752511299632	1.00657595791422	1.04891026805953	0.00977565582766181	0.0135102078411903
FGF8	21	Inverse variance weighted	0.0285154	0.0110376476030869	1.02892584656773	1.00690533399188	1.05142793666407	0.00978130210716054	0.0135102078411903
FABP5	21	Inverse variance weighted	0.0336498936159463	0.0130276416946171	1.03422245545189	1.00814873758785	1.06097051702923	0.00979563257819028	0.0135102078411903
DAO	21	Inverse variance weighted	0.0302401936153078	0.0117311842871779	1.03070207228081	1.00727339599292	1.05467568788188	0.0099442646280199	0.0135102078411903
QRFP	21	Inverse variance weighted	0.0278458713233116	0.010808634367459	1.02823719136995	1.00668318141485	1.05025269244134	0.00998750074666044	0.0135102078411903
LRFN2	21	Inverse variance weighted	0.0326344330041274	0.0126703434758931	1.03317277632863	1.00783106342145	1.05915170159845	0.0100050430911066	0.0135102078411903
ACP5	21	Inverse variance weighted	-0.0293969	0.0114159167458286	0.971030989676305	0.949545250379474	0.993002895370099	0.0100216977863606	0.0135102078411903
PARP16	21	Inverse variance weighted	0.03244730603857	0.012602048176196	1.03297945993001	1.00777737952665	1.05881178354935	0.0100308363694311	0.0135102078411903
PFKFB3	21	Inverse variance weighted	0.028096248904145	0.0109126635104951	1.02849467114268	1.00672997360013	1.05072990405374	0.0100342635633299	0.0135102078411903
LGALS13	21	Inverse variance weighted	0.0277904363901922	0.01079466264258	1.02818019268989	1.00665494399294	1.05016571462568	0.0100396447168869	0.0135102078411903
SUDS3	21	Inverse variance weighted	0.0295052083700159	0.0114622534391071	1.02994479979154	1.00706402497346	1.05334543217904	0.0100495600238734	0.0135102078411903
KRT18	21	Inverse variance weighted	0.0299322006735407	0.0116300656810505	1.03038467219848	1.00716280296854	1.05414196153027	0.0100619959522771	0.0135102078411903
THSD7A	21	Inverse variance weighted	0.0278380041308485	0.0108213473620166	1.02822910206189	1.00665017818821	1.05027059969319	0.0100964582832984	0.0135102078411903
CXCL17	21	Inverse variance weighted	0.0287991908872491	0.011213702972004	1.02921789738969	1.00684364450078	1.05208935478009	0.0102223976325236	0.0135102078411903
LOXL3	21	Inverse variance weighted	0.0278562340455026	0.0108512156711105	1.02824784676152	1.00660959895317	1.0503512339533	0.0102550898622396	0.0135102078411903
DNAJB12	21	Inverse variance weighted	0.0283715395372757	0.0110550156239226	1.02877784506765	1.00672622906571	1.05131248590221	0.0102761659341169	0.0135102078411903
THPO	21	Inverse variance weighted	0.0292353000705152	0.0113983306940759	1.02966684665466	1.0069183941877	1.05292923559614	0.0103212807656908	0.0135102078411903
AS3MT	21	Inverse variance weighted	0.0276780550988951	0.0107953707921844	1.02806465096463	1.00654042411488	1.05004915971701	0.0103508776803539	0.0135102078411903
APOBEC3G	21	Inverse variance weighted	0.028729811656649	0.0112089851348729	1.02914649352085	1.00678310252736	1.0520066362531	0.0103740514680968	0.0135102078411903
EEF1B2	21	Inverse variance weighted	0.0281792600193012	0.0109957948286659	1.02858005117596	1.00664951264551	1.05098836127854	0.0103852592562521	0.0135102078411903
KDELC1	21	Inverse variance weighted	0.027352380442035	0.0106744382033615	1.0277298908766	1.00645120149926	1.04945846060675	0.0103945910227764	0.0135102078411903
ACLY	21	Inverse variance weighted	0.0300607541080103	0.0117314322931079	1.03051714020135	1.00709217802724	1.05448696695174	0.0103948150317682	0.0135102078411903
RAB32	21	Inverse variance weighted	0.0277482831792809	0.0108335324537407	1.02813685250684	1.00653582546738	1.05020145407326	0.0104271386013478	0.0135102078411903
PTPN4	21	Inverse variance weighted	0.0289024566733079	0.0112879767361289	1.02932418587278	1.00680104505036	1.05235119175872	0.0104532530114388	0.0135102078411903
MTAP	21	Inverse variance weighted	0.0330919755873585	0.0129259594727757	1.03364560503102	1.00778725922739	1.06016743813474	0.0104636765990219	0.0135102078411903
CTRL	21	Inverse variance weighted	0.0279447788007262	0.010919372363477	1.02833889674636	1.00656425990051	1.05058457635486	0.0104915546249517	0.0135102078411903
HS3ST4	21	Inverse variance weighted	0.0303206322568221	0.0118528350293601	1.03078498388991	1.00711426257799	1.05501205026441	0.0105248504355828	0.0135102078411903
PCDHGC5	21	Inverse variance weighted	0.0275935682576449	0.0107898455249249	1.02797779669875	1.00646628777773	1.04994907761776	0.0105468628683117	0.0135102078411903
CPZ	21	Inverse variance weighted	0.0274337395488289	0.0107324438421674	1.02781350946407	1.00641866150014	1.04966317761059	0.010583739281751	0.0135102078411903
MICB	21	Inverse variance weighted	0.029262505434912	0.0114480197550444	1.02969485949748	1.00684772590372	1.0530604344603	0.0105846790930367	0.0135102078411903
PYDC1	21	Inverse variance weighted	0.0274626240243401	0.0107447608280047	1.02784319774697	1.00642343513962	1.04971883828218	0.0105911007325406	0.0135102078411903
RBM46	21	Inverse variance weighted	0.0270857191908671	0.0106005744805193	1.02745587167481	1.00632853429453	1.04902676637217	0.0106151790200061	0.0135102078411903
NTMT1	21	Inverse variance weighted	0.0291713668911031	0.0114178346623828	1.02960101888373	1.00681553169499	1.05290216997522	0.0106219882543093	0.0135102078411903
PDCL2	21	Inverse variance weighted	0.0294342693506765	0.0115217471924644	1.02987173910892	1.00687517107245	1.05339353823327	0.0106288315613827	0.0135102078411903
TESC	21	Inverse variance weighted	0.0275805705779781	0.01080068385186	1.02796443545947	1.00643182615641	1.04995773494676	0.0106617237669944	0.0135102078411903
EVL	21	Inverse variance weighted	0.0285603409152436	0.0111889655539777	1.02897209807946	1.00665199532243	1.0517870957847	0.0106939016534055	0.0135102078411903
ANTXR2	21	Inverse variance weighted	-0.0535727	0.0209914716890519	0.947837007262967	0.909631224610731	0.987647486179553	0.0107070073159833	0.0135102078411903
FAM20B	21	Inverse variance weighted	0.0280050936770568	0.0109876018552378	1.02840092275027	1.00649036577082	1.05078845648327	0.0108097259312612	0.0135102078411903
ROBLD3	21	Inverse variance weighted	0.0276915594387684	0.0108665931706222	1.02807853439283	1.00641351590217	1.0502099347621	0.0108243052432172	0.0135102078411903
RAP1GDS1	21	Inverse variance weighted	0.0295215084128057	0.0116033978948596	1.02996158807267	1.00680187693857	1.05365404773664	0.0109524473759165	0.0135102078411903
GGPS1	21	Inverse variance weighted	0.0282053727094119	0.0110925373173245	1.02860691051878	1.00648493630003	1.05121511331948	0.0109988899877576	0.0135102078411903
G3BP2	21	Inverse variance weighted	0.0272489831498368	0.010717701360949	1.02762363188231	1.00626181216814	1.04943893928326	0.0110085305322463	0.0135102078411903
ASPA	21	Inverse variance weighted	0.0291738657454343	0.0114752510215789	1.02960359170991	1.00670475061834	1.0530232974572	0.0110116405502709	0.0135102078411903
NFU1	21	Inverse variance weighted	0.0274614689598692	0.0108036232365779	1.0278420105225	1.00630616809352	1.04983873903548	0.0110259330862909	0.0135102078411903
FN1	21	Inverse variance weighted	0.0290008042128614	0.0114097875018998	1.02942542235196	1.00665969853452	1.05270599560828	0.0110299675583193	0.0135102078411903
CRH	21	Inverse variance weighted	0.0268875644635582	0.0105800870033982	1.02725229660708	1.00616954767878	1.04877680239773	0.0110429486196953	0.0135102078411903
PGR	21	Inverse variance weighted	0.0293674794515354	0.0115560392737949	1.02980295637636	1.00674025644427	1.05339398337668	0.0110437917305884	0.0135102078411903
ST6GALNAC3	21	Inverse variance weighted	0.028608212130359	0.0112612184372683	1.02902135740316	1.00655763172185	1.05198641450911	0.0110719769152608	0.0135102078411903
WNT5A	21	Inverse variance weighted	0.0781553395852818	0.0307863418306856	1.08129061286015	1.01797372725428	1.14854574156159	0.0111285293484747	0.0135102078411903
PPBP	21	Inverse variance weighted	0.0284084354698578	0.0111919213601972	1.02881580348591	1.00649326000152	1.0516334282266	0.0111392977985959	0.0135102078411903
ASF1A	21	Inverse variance weighted	0.0283111810878426	0.011154483522301	1.02871575150606	1.00646922903416	1.05145400064761	0.011145651856893	0.0135102078411903
GRB2	21	Inverse variance weighted	0.0278403446585604	0.0109712307480031	1.02823150866341	1.00635685195616	1.05058164343307	0.011162275606172	0.0135102078411903
PDZD11	21	Inverse variance weighted	0.0330131835713813	0.0130127498746364	1.03356416521844	1.00753645098011	1.0602642540471	0.0111810951327882	0.0135102078411903
ERP29	21	Inverse variance weighted	0.0274982136134122	0.0108392158904805	1.02787977891496	1.00627294348348	1.04995055938281	0.0111832800331493	0.0135102078411903
TBX3	21	Inverse variance weighted	0.0293770381581094	0.0115867577165974	1.02981280000769	1.00668926690403	1.05346747792513	0.0112319748835726	0.0135102078411903
RNF215	21	Inverse variance weighted	0.0280176133813125	0.0110528343482142	1.02841379810628	1.00637428791024	1.05093597167668	0.0112485716679324	0.0135102078411903
MTIF3	21	Inverse variance weighted	0.0272031959056615	0.0107352708772198	1.02757658090533	1.00618108956558	1.04942702717757	0.011276814708813	0.0135102078411903
AK4	21	Inverse variance weighted	0.0275831036284321	0.0108881135516683	1.02796703934855	1.00626192545792	1.0501403334983	0.0112986930028637	0.0135102078411903
CILP	21	Inverse variance weighted	0.0271308893067225	0.01070963008282	1.02750228302376	1.00615890287129	1.04929841460052	0.0112988679624274	0.0135102078411903
TMEM59L	21	Inverse variance weighted	0.0272217673676284	0.0107458740666143	1.02759566468193	1.00617886511371	1.04946832684044	0.0113016865555259	0.0135102078411903
DLG3	21	Inverse variance weighted	0.0282919301431485	0.0111698253996836	1.02869594794665	1.00641959016493	1.0514653765319	0.0113126704593159	0.0135102078411903
IL18RAP	21	Inverse variance weighted	0.0275329563490497	0.0108705674343594	1.02791549089075	1.00624607002491	1.05005156083443	0.0113155995429101	0.0135102078411903
NHEJ1	21	Inverse variance weighted	0.0273157391867681	0.0107867700306006	1.02769223425322	1.00619276630499	1.04965108447643	0.0113304966174955	0.0135102078411903
MANF	21	Inverse variance weighted	0.0278257810923685	0.010988329155565	1.02821653405482	1.0063084710593	1.05060155142169	0.0113315959318484	0.0135102078411903
NR1H2	21	Inverse variance weighted	0.0280562604560089	0.0110803528846148	1.02845354405918	1.00635890131309	1.05103327541276	0.011339043761112	0.0135102078411903
CD226	21	Inverse variance weighted	0.032473453192366	0.0128268048373283	1.03300646975594	1.00735986737543	1.05930601477885	0.0113515317553123	0.0135102078411903
CLEC1B	21	Inverse variance weighted	0.0289324178670315	0.0114355575733226	1.02935502611612	1.00654001815416	1.05268717654526	0.0114049529890091	0.0135102078411903
TIGAR	21	Inverse variance weighted	0.0305020363049872	0.0120562683911743	1.03097198942005	1.00689541490889	1.05562427560056	0.0114071229003465	0.0135102078411903
PLA2G2C	21	Inverse variance weighted	0.0317095930978671	0.012539866425041	1.03221769863008	1.00715694428541	1.05790203146654	0.0114484983095201	0.0135102078411903
UFC1	21	Inverse variance weighted	0.0282899954802132	0.0111911159528174	1.02869395776865	1.0063756466713	1.05150722024114	0.0114747804822326	0.0135102078411903
CXCL6	21	Inverse variance weighted	0.0268650344499538	0.0106334219256426	1.02722915285958	1.00604170539739	1.04886281236999	0.0115214828450575	0.0135102078411903
FOXG1	21	Inverse variance weighted	0.0269036801250967	0.0106501868193693	1.02726885159081	1.0060475268579	1.04893781384718	0.0115329149247424	0.0135102078411903
SLC6A9	21	Inverse variance weighted	0.0336028381814548	0.0133028903532156	1.03417379080987	1.00755758858315	1.06149310145342	0.0115375970108712	0.0135102078411903
LCK	21	Inverse variance weighted	0.0273154161383173	0.0108159665980638	1.02769190225889	1.00613486326714	1.04971081365667	0.0115543130039289	0.0135102078411903
CT55	21	Inverse variance weighted	0.0269852180147425	0.0106881535187557	1.02735261634002	1.00605469311977	1.04910141120432	0.0115771300295437	0.0135102078411903
L3MBTL2	21	Inverse variance weighted	0.0278738234757554	0.0110475609225199	1.02826593321437	1.00623999220623	1.05077400779009	0.0116333625546377	0.0135102078411903
FAM171B	21	Inverse variance weighted	0.0265360505042145	0.010518660548268	1.02689126654233	1.00593703054781	1.04828199109705	0.011643801420317	0.0135102078411903
TAGLN2	21	Inverse variance weighted	0.0274446267426884	0.0108803322461779	1.02782469952991	1.00613793594137	1.04997890967637	0.0116554749427164	0.0135102078411903
TFAM	21	Inverse variance weighted	0.0267281909503851	0.0106013319489238	1.02708859284503	1.00596731423587	1.04865333358637	0.0116951818326104	0.0135102078411903
DUSP6	21	Inverse variance weighted	0.0274843493090649	0.010901251719581	1.02786552817566	1.00613664848659	1.05006367236599	0.0116951896365465	0.0135102078411903
PLD5	21	Inverse variance weighted	0.0307763633918141	0.0122096625201263	1.03125485175913	1.00686890832728	1.05623141253168	0.0117136185986914	0.0135102078411903
FLRT3	21	Inverse variance weighted	0.0271202717321657	0.0107621262081129	1.02749137349958	1.00604470027591	1.04939524290176	0.0117363704328165	0.0135102078411903
STOML1	21	Inverse variance weighted	0.0277747174826754	0.0110230234695645	1.02816403094755	1.00618866261205	1.05061934586905	0.0117454733924721	0.0135102078411903
ADM2	21	Inverse variance weighted	0.0276429083657342	0.0109711829446272	1.02802851848565	1.00615827447481	1.05037414254873	0.0117490823134124	0.0135102078411903
WNT7A	21	Inverse variance weighted	0.030088015374748	0.011947234039648	1.03054523378691	1.00669374026201	1.05496183834868	0.0117886519549404	0.0135102078411903
C4BPB	21	Inverse variance weighted	0.0309228333979269	0.0122821487889575	1.03140591072611	1.00687333545825	1.05653622478402	0.0118122044835393	0.0135102078411903
APRT	21	Inverse variance weighted	0.0279389799026166	0.0111017388983334	1.02833293353117	1.00619870460567	1.05095406836091	0.0118482856123972	0.0135102078411903
TCL1A	21	Inverse variance weighted	0.0281883154103533	0.0112010381815676	1.02858936541273	1.0062537541485	1.05142075572721	0.0118499792158219	0.0135102078411903
GNPNAT1	21	Inverse variance weighted	0.0284108508225435	0.0112913487670001	1.02881828844193	1.00629956656864	1.05184092868272	0.0118640990061015	0.0135102078411903
FN1	21	Inverse variance weighted	0.0284031115763683	0.0112901785852389	1.02881032619474	1.00629408658815	1.05183037582344	0.0118784036020464	0.0135102078411903
TAF15	21	Inverse variance weighted	0.0274684254896047	0.0109191357777536	1.02784916076088	1.00608536039505	1.05008375915738	0.0118822319521782	0.0135102078411903
FANCL	21	Inverse variance weighted	0.0269885484719927	0.0107333041646623	1.02735603789969	1.00596901631264	1.04919775012327	0.0119212164227549	0.0135102078411903
TSR3	21	Inverse variance weighted	0.0273517640536724	0.0108790366167143	1.02772925739605	1.0060470623918	1.0498787442376	0.0119312390294112	0.0135102078411903
GLT8D1	21	Inverse variance weighted	0.0264855183516591	0.0105434973297941	1.02683937682725	1.00583723422793	1.0482800496169	0.0120040924096388	0.0135102078411903
HIF1AN	21	Inverse variance weighted	0.031783516185335	0.0126576055339348	1.03229400616971	1.00699898857212	1.05822441458945	0.0120382457813068	0.0135102078411903
EMID1	21	Inverse variance weighted	0.0323016138201154	0.0128662473190058	1.03282897382347	1.00710891831575	1.05920588108108	0.0120536440597184	0.0135102078411903
MTX2	21	Inverse variance weighted	0.0269022844888158	0.0107158031157851	1.02726741789813	1.00591674558172	1.04907126013179	0.012055201292624	0.0135102078411903
FAM19A3	21	Inverse variance weighted	0.0388407351851544	0.0154728465188553	1.03960489798293	1.00855030281012	1.07161570513512	0.0120645224590914	0.0135102078411903
CUTC	21	Inverse variance weighted	0.0267829920175598	0.0106699493652444	1.02714487993828	1.00588715283138	1.04885185322601	0.0120685697132828	0.0135102078411903
INPP5B	21	Inverse variance weighted	0.0279622083489056	0.011141426341478	1.02835682038491	1.00614380896617	1.05106023672577	0.0120816244539103	0.0135102078411903
KLHL7	21	Inverse variance weighted	0.0268433781992834	0.0106961214354914	1.02720690716843	1.00589629530485	1.04896899914991	0.0120855450618326	0.0135102078411903
LY9	21	Inverse variance weighted	0.0279238835527545	0.0111291085624547	1.0283174095746	1.0061295399869	1.05099458152078	0.0121044224363007	0.0135102078411903
DSCAM	21	Inverse variance weighted	0.0319136942953067	0.0127203789394372	1.03242839699955	1.00700618082142	1.05849240573836	0.0121120281678387	0.0135102078411903
KIAA1549L	21	Inverse variance weighted	0.027381851260524	0.0109164323544775	1.02776017936398	1.00600359360763	1.0499872893081	0.0121308464165914	0.0135102078411903
GH1	21	Inverse variance weighted	0.0267561964419426	0.0106708929054502	1.02711735736872	1.00585833969264	1.04882568864565	0.0121623004181834	0.0135102078411903
ITM2C	21	Inverse variance weighted	0.0275242748930506	0.0109775337588694	1.02790656712638	1.00602639481667	1.05026261357098	0.0121647860024904	0.0135102078411903
IQCF1	21	Inverse variance weighted	0.0292482667871293	0.0116656025439843	1.02968019813943	1.00640410494981	1.05349462032782	0.0121683921492787	0.0135102078411903
CA10	21	Inverse variance weighted	0.0284688979314545	0.0113554136180237	1.02887801010249	1.0062316235166	1.05203407936323	0.0121734140328477	0.0135102078411903
RNF215	21	Inverse variance weighted	0.0272770585117545	0.0108823340570352	1.02765248319269	1.00596540634972	1.04980710027018	0.0121917585468489	0.0135102078411903
DDX19B	21	Inverse variance weighted	0.0277884832858612	0.0110932304347431	1.02817818454866	1.00606406407573	1.05077839168521	0.0122453233257402	0.0135102078411903
C5orf46	21	Inverse variance weighted	0.0278266291628381	0.0111169328770788	1.02821740605526	1.00605570280258	1.05086729409701	0.0123115933340602	0.0135102078411903
CD80	21	Inverse variance weighted	0.0338706931094632	0.013543139029145	1.03445083645852	1.00735304243586	1.06227756106456	0.0123861192004822	0.0135102078411903
CLC	21	Inverse variance weighted	0.0295006566488232	0.0117972734310133	1.02994011178063	1.00639838348136	1.05403252952895	0.0123971413609523	0.0135102078411903
PDE9A	21	Inverse variance weighted	0.0338474235327481	0.0135373340302627	1.03442676550548	1.00734106328743	1.06224075657365	0.0124087470823268	0.0135102078411903
ARL6	21	Inverse variance weighted	0.0278433466233409	0.0111361423252587	1.02823459538282	1.0060346432007	1.05092442918106	0.0124099187345011	0.0135102078411903
NDNF	21	Inverse variance weighted	0.0272399421029946	0.0109019428096336	1.02761434113092	1.00588940897284	1.04980848260074	0.0124673735984522	0.0135102078411903
MSR1	21	Inverse variance weighted	0.0277378504865873	0.0111060851771578	1.02812612632696	1.00598777904721	1.05075166284548	0.0125059672946896	0.0135102078411903
ARHGEF1	21	Inverse variance weighted	0.0271249759592407	0.010861064774133	1.02749620706369	1.00585435917173	1.04960369849133	0.0125089788015886	0.0135102078411903
FANK1	21	Inverse variance weighted	0.0310764462386524	0.0124444821134893	1.03156436008761	1.00670765753593	1.0570348015506	0.0125175908035718	0.0135102078411903
DIRAS3	21	Inverse variance weighted	0.0264458586195622	0.0105910135834672	1.0267986534602	1.0057036763709	1.04833610487754	0.0125245698454467	0.0135102078411903
BCAP29	21	Inverse variance weighted	0.0269854798149798	0.0108078924114952	1.02735288530121	1.00581887495223	1.04934792657062	0.0125308693483008	0.0135102078411903
KCNIP1	21	Inverse variance weighted	0.0271780903689694	0.0108852535313471	1.02755078336761	1.00586009702956	1.04970921454931	0.0125326453722386	0.0135102078411903
FXR1	21	Inverse variance weighted	0.0273147731393353	0.0109445621862414	1.02769124145425	1.00588065481394	1.04997474870132	0.01256949687825	0.0135102078411903
PRPF6	21	Inverse variance weighted	0.0268734939497209	0.0107703159624604	1.02723784274112	1.00578031659364	1.04915314820757	0.0125905868727466	0.0135102078411903
ACPP	21	Inverse variance weighted	0.0318788767314271	0.0127773072278121	1.03239245098366	1.00686	1.0585736607254	0.0125971154953408	0.0135102078411903
PFDN5	21	Inverse variance weighted	0.0292389088421056	0.0117236258371951	1.02967056249383	1.00628024073278	1.05360457688635	0.0126306898617251	0.0135102078411903
IRF3	21	Inverse variance weighted	0.0272691868904752	0.0109343468642795	1.02764439393338	1.00585494059046	1.04990586392384	0.0126347508163604	0.0135102078411903
APCDD1	21	Inverse variance weighted	0.0269051522561594	0.0107945775548206	1.02727036386631	1.00576433043135	1.04923625599789	0.0126858326703806	0.0135102078411903
TRIL	21	Inverse variance weighted	0.0275312948957621	0.0110474006989422	1.0279137830586	1.00589570116244	1.05041381942561	0.0126988089927122	0.0135102078411903
ELMO1	21	Inverse variance weighted	0.0265190221144398	0.0106528834228628	1.02687378038647	1.00565530178925	1.0485399509843	0.0127967894342359	0.0135102078411903
TWF1	21	Inverse variance weighted	0.0272226202058887	0.0109419675390415	1.0275965410552	1.00579307918808	1.04987265575642	0.0128496584732021	0.0135102078411903
TCEA2	21	Inverse variance weighted	0.0268963187938496	0.0108121844818528	1.02726128955234	1.00572073849317	1.04926319665418	0.0128610676659174	0.0135102078411903
AKT1	21	Inverse variance weighted	0.0276477410611941	0.0111188623570553	1.02803348664641	1.00587194350982	1.05068329670142	0.0128984077859019	0.0135102078411903
THSD1	21	Inverse variance weighted	0.0275919382658859	0.0110967640841101	1.02797612110477	1.00585938006631	1.05057916295611	0.0129011981357929	0.0135102078411903
GPX2	21	Inverse variance weighted	0.0264843600037392	0.0106538472914839	1.02683818739068	1.00561854445922	1.04850558782286	0.0129225600335131	0.0135102078411903
PRR16	21	Inverse variance weighted	0.0268126640508741	0.0107864528270479	1.02717535786754	1.00568732830163	1.04912251165789	0.0129270702024094	0.0135102078411903
PDCD1	21	Inverse variance weighted	0.0263420250895755	0.0105990174860678	1.0266920428664	1.0055834806648	1.04824370244061	0.0129432454840049	0.0135102078411903
SPOCK1	21	Inverse variance weighted	0.0264851433867614	0.0106582613274599	1.0268389917986	1.00561063215544	1.04851548040812	0.0129573152551916	0.0135102078411903
S100P	21	Inverse variance weighted	0.0266057955209757	0.010708652805615	1.02696288958857	1.00563264002105	1.04874557032082	0.0129728485140357	0.0135102078411903
EDA	21	Inverse variance weighted	0.0269158147656934	0.0108360440488265	1.02728131720475	1.0056933140901	1.04933272389576	0.0129946740287001	0.0135102078411903
KRTDAP	21	Inverse variance weighted	0.0267621827047242	0.0107792579823736	1.02712350598153	1.00565074261465	1.04905475811303	0.0130373230088356	0.0135102078411903
CHST3	21	Inverse variance weighted	0.0282678253417067	0.0113925364467481	1.02867115173393	1.00595612147885	1.05189909958897	0.0130919473322123	0.0135102078411903
FEV	21	Inverse variance weighted	0.0270264294478126	0.0108923638154848	1.02739495588604	1.00569354332733	1.04956465355025	0.0130930885906555	0.0135102078411903
SHH	21	Inverse variance weighted	-0.0300607	0.0121186845779207	0.970386629979036	0.947608988627883	0.993711776632216	0.0131189087224847	0.0135102078411903
COG8	21	Inverse variance weighted	0.0313769306884871	0.0126511394809065	1.03187437571193	1.00660239766949	1.05778083751444	0.0131321093464307	0.0135102078411903
EIF4H	21	Inverse variance weighted	0.0271437174878629	0.0109497938700223	1.02751546409372	1.00569829537446	1.04980592470689	0.0131779021779731	0.0135102078411903
ACRV1	21	Inverse variance weighted	0.0263389634103185	0.0106308024776791	1.02668889946948	1.00551775761208	1.04830579899168	0.0132266297647132	0.0135102078411903
P2RX6	21	Inverse variance weighted	0.030093982394196	0.01215684986952	1.03055138308871	1.00628623259473	1.05540165291498	0.0133058940144735	0.0135102078411903
IL1A	21	Inverse variance weighted	0.0301096975495507	0.0121633440449685	1.03056757849106	1.00628923794498	1.05543167291132	0.0133070000164262	0.0135102078411903
ESAM	21	Inverse variance weighted	0.0281199389413321	0.011366075137992	1.0285190365083	1.00585953196099	1.05168900313308	0.0133600844378781	0.0135102078411903
PLCG1	21	Inverse variance weighted	0.0267635598614175	0.0108195709301282	1.02712492049252	1.00557267072209	1.04913909557545	0.0133750049893518	0.0135102078411903
MEMO1	21	Inverse variance weighted	0.0270372474935618	0.0109310004238948	1.02740607035179	1.00562826617295	1.04965549289181	0.01338167439706	0.0135102078411903
KIR3DL1	21	Inverse variance weighted	0.0279907051183743	0.0113214422545319	1.0283861256497	1.00581753481116	1.05146111180827	0.013422347413703	0.0135102078411903
RAB22A	21	Inverse variance weighted	0.0271748480262879	0.0109928118601756	1.02754745170125	1.00564480901227	1.04992712738683	0.013433841924468	0.0135102078411903
COL23A1	21	Inverse variance weighted	0.027282019500524	0.0110378047030515	1.02765758137777	1.00566390186525	1.0501322585055	0.0134476479737118	0.0135102078411903
PAPSS1	21	Inverse variance weighted	0.0274283693985663	0.0110973826021414	1.0278079899659	1.00569364704341	1.05040860837032	0.0134507262506936	0.0135102078411903
LYN	21	Inverse variance weighted	0.0265932331780263	0.0107597910148271	1.02694998860959	1.00551921786112	1.04883751635158	0.0134533224036728	0.0135102078411903
EFS	21	Inverse variance weighted	0.0330432809302376	0.0133723046438634	1.03359527323815	1.00685696590171	1.0610436487406	0.0134726911255254	0.0135102078411903
ECEL1	21	Inverse variance weighted	0.0267555187181178	0.0108281415816391	1.02711666126705	1.00554769298902	1.0491482832768	0.0134764323215873	0.0135102078411903
SYT7	21	Inverse variance weighted	0.0323887974109567	0.0131326246326177	1.03291902348751	1.00667100582446	1.05985143399315	0.0136522594279928	0.0262196098245697
SUOX	21	Inverse variance weighted	0.0291089093213115	0.0118030248222032	1.0295367145144	1.00599286647149	1.05363157320475	0.0136545712483431	0.0262196098245697
BTK	21	Inverse variance weighted	0.0270521299761209	0.010973961094164	1.02742136081849	1.00555855800407	1.04975950357518	0.0136967406443195	0.0262196098245697
OLFML3	21	Inverse variance weighted	0.0278078394463539	0.0112813540986424	1.02819808632323	1.00571264066714	1.05118625536759	0.0137036926267852	0.0262196098245697
DNM2	21	Inverse variance weighted	0.0269090339911825	0.0109183861744051	1.02727435146539	1.0055241995177	1.04949497355192	0.0137181027037351	0.0262196098245697
USP28	21	Inverse variance weighted	0.0265658530763002	0.0107798902071514	1.02692187099937	1.00545207704099	1.04885011749182	0.0137246703418403	0.0262196098245697
UBQLN4	21	Inverse variance weighted	0.0268305752314568	0.0108884901781683	1.02719375595563	1.00550422738395	1.04935114496674	0.0137349104328446	0.0262196098245697
IFNA2	21	Inverse variance weighted	0.0300521720747072	0.0121978550189452	1.03050829630688	1.00616329163852	1.05544234974817	0.0137501194905679	0.0262196098245697
TARS	21	Inverse variance weighted	0.0261265518760749	0.0106048361537209	1.02647084206493	1.00535536197339	1.04802981061474	0.0137532242547703	0.0262196098245697
CLEC2D	21	Inverse variance weighted	0.0267184626132606	0.0108476204653669	1.02707860102954	1.00547204373871	1.04914946095402	0.0137752520291054	0.0262196098245697
LZIC	21	Inverse variance weighted	0.0276676157432144	0.0112344866834831	1.0280539186881	1.0056640019902	1.05094232033599	0.0137879996584679	0.0262196098245697
FDCSP	21	Inverse variance weighted	0.0274777602789164	0.0111592267554943	1.02785875556102	1.00562141703856	1.05058782906067	0.0138035474228155	0.0262196098245697
IFNA6	21	Inverse variance weighted	0.0331334755885534	0.0134578923916236	1.03368850221497	1.00677887979458	1.06131737669094	0.0138160529993543	0.0262196098245697
IL20	21	Inverse variance weighted	0.0275988323887642	0.0112147377581339	1.0279832081229	1.00563375663679	1.05082935930553	0.0138572310461808	0.0262196098245697
GGA3	21	Inverse variance weighted	0.0268826237125219	0.010928144876453	1.02724722122177	1.00547841166824	1.04948732987419	0.0138958721359969	0.0262196098245697
NGRN	21	Inverse variance weighted	0.0279283324250808	0.0113538232162286	1.02832198443765	1.00569097132148	1.05146226209855	0.0139007702992007	0.0262196098245697
GSTP1	21	Inverse variance weighted	0.0314510050265515	0.0127903472650428	1.03195081395429	1.00640233225724	1.05814786819148	0.0139338542089866	0.0262196098245697
BRICD5	21	Inverse variance weighted	0.0266565656630135	0.0108412176383209	1.02701502996392	1.00542242752251	1.04907135836511	0.0139395815755918	0.0262196098245697
CDC42	21	Inverse variance weighted	0.0272747363568522	0.0110976258345108	1.02765009682721	1.00553867176148	1.0502477439868	0.013982637214584	0.0262196098245697
TACSTD2	21	Inverse variance weighted	0.0315290546653141	0.0128288345102097	1.03203136048582	1.0064049636387	1.05831029009966	0.0139841214277125	0.0262196098245697
FIBP	21	Inverse variance weighted	0.0272643180853244	0.0110941345993036	1.02763939054524	1.00553507651414	1.05022961571977	0.0139890877933652	0.0262196098245697
RDH16	21	Inverse variance weighted	0.0272849444557708	0.0111178824632025	1.0276605872346	1.00550901394301	1.05030016430585	0.0141218300978207	0.0262196098245697
COX5A	21	Inverse variance weighted	0.0264686955360448	0.0107885584973226	1.02682210264305	1.00533731386173	1.04876603696947	0.0141511198038351	0.0262196098245697
EIF4A2	21	Inverse variance weighted	0.0295256681129955	0.0120358762727447	1.02996587241299	1.00595299971247	1.05455195087511	0.0141615910771204	0.0262196098245697
NDE1	21	Inverse variance weighted	0.027042679134389	0.0110258550503334	1.0274116508677	1.00544678331501	1.04985636023263	0.0141804103936805	0.0262196098245697
HNRNPK	21	Inverse variance weighted	0.0299402063790719	0.0122074893075886	1.03039292118777	1.00603164489031	1.05534411111853	0.014182413797005	0.0262196098245697
FOXL2	21	Inverse variance weighted	0.0332499714679553	0.0135592861228219	1.03380892968058	1.0066960898982	1.06165198594879	0.0141988920154521	0.0262196098245697
NEFH	21	Inverse variance weighted	0.0265940174477002	0.0108460556364271	1.02695079401564	1.00535000885792	1.04901569009524	0.0142083262928927	0.0262196098245697
SYTL1	21	Inverse variance weighted	0.0264777558481477	0.0108008320131752	1.02683140601392	1.00532223815861	1.04880076890348	0.0142279894861994	0.0262196098245697
NUP210	21	Inverse variance weighted	0.0270786062741915	0.011049091050296	1.0274485634928	1.00543711556825	1.04994189519926	0.0142557265206335	0.0262196098245697
AKT2	21	Inverse variance weighted	0.0272271214536544	0.0111135117211292	1.02760116653225	1.00545948746121	1.05023043755323	0.0142891284828709	0.0262196098245697
SNX4	21	Inverse variance weighted	0.0271725054551797	0.0110931050774696	1.02754504460109	1.00544478877963	1.05013107678027	0.0143056694775833	0.0262196098245697
CBR3	21	Inverse variance weighted	0.026700640348067	0.0109113390426921	1.02706029632545	1.00532856238129	1.04926179535726	0.0144029093431575	0.0262196098245697
REG4	21	Inverse variance weighted	0.0273757839627292	0.0111878175616353	1.02775394365583	1.00546252703186	1.05053956791235	0.0144079621109217	0.0262196098245697
MTMR6	21	Inverse variance weighted	0.0346153282642533	0.0141502559161134	1.03522141178038	1.00690455394637	1.0643346156379	0.0144343377530641	0.0262196098245697
LILRA5	21	Inverse variance weighted	0.0285263375937377	0.0116617609347149	1.02893711020525	1.00568538697682	1.05272641968092	0.0144393624145504	0.0262196098245697
DUT	21	Inverse variance weighted	0.0263921223801317	0.0107901338382994	1.02674347864437	1.00525723105245	1.04868897071753	0.0144471237847972	0.0262196098245697
POLM	21	Inverse variance weighted	0.0270550166756415	0.0110664161598091	1.02742432667952	1.00537925753117	1.04995278065019	0.0144938208920007	0.0262196098245697
CFL1	21	Inverse variance weighted	0.0266398793323816	0.0108976329609639	1.02699789299454	1.00529448524057	1.04916985788779	0.0145030368184249	0.0262196098245697
TBC1D5	21	Inverse variance weighted	0.0280183481005822	0.0114633853387258	1.02841455370199	1.00556554324656	1.05178275187452	0.0145189852856027	0.0262196098245697
COL25A1	21	Inverse variance weighted	0.0262647758615213	0.0107479263897088	1.02661273476193	1.00521237755654	1.04846869249387	0.0145372539730893	0.0262196098245697
WNT11	21	Inverse variance weighted	0.0268325667800384	0.0109819751934283	1.02719580166394	1.00532200723471	1.0495455260731	0.0145525070915309	0.0262196098245697
VWA1	21	Inverse variance weighted	0.028069127031041	0.0114893068409583	1.02847	1.00556551588118	1.05188960273121	0.0145631013972631	0.0262196098245697
KLRB1	21	Inverse variance weighted	0.0260690342397926	0.0106785543289221	1.02641180358627	1.00515229541337	1.04812096171751	0.0146364672750057	0.0262196098245697
RALB	21	Inverse variance weighted	0.0265728699867978	0.0108866438981363	1.02692907684351	1.00524877475299	1.04907696020399	0.0146519746937414	0.0262196098245697
KCNE5	21	Inverse variance weighted	0.0284060631481782	0.0116379641476415	1.02881336280678	1.00561133832952	1.05255	0.0146543489826247	0.0262196098245697
SEMA4B	21	Inverse variance weighted	0.0268333404975837	0.0109968599281007	1.02719659642366	1.0052934561308	1.04957695812065	0.0146835567990154	0.0262196098245697
KIR2DS4	21	Inverse variance weighted	0.0276109745592571	0.0113201169957285	1.02799569014605	1.00543827929404	1.05105918555326	0.0147236152961387	0.0262196098245697
PSG6	21	Inverse variance weighted	0.027324150541354	0.0112030543680161	1.02770087857336	1.00538058762632	1.05051669867035	0.0147283286430802	0.0262196098245697
DAPK1	21	Inverse variance weighted	0.0266841275279954	0.0109491854173956	1.0270433368036	1.00523739154463	1.04932230391059	0.0148060789151489	0.0262196098245697
MSRB2	21	Inverse variance weighted	0.0296034907862396	0.0121488078726521	1.03004603022954	1.00580863241624	1.05486748691232	0.0148203152732523	0.0262196098245697
SPN	21	Inverse variance weighted	0.0279966866072195	0.0114899622798882	1.02839227694823	1.00549138321168	1.05181475738626	0.0148251970514443	0.0262196098245697
MYDGF	21	Inverse variance weighted	0.0261733497814125	0.0107506113110184	1.02651887987425	1.00511518975211	1.04837835651273	0.0149085990091934	0.0262196098245697
NTN1	21	Inverse variance weighted	0.027171469554494	0.0111615011512539	1.02754398016703	1.00530897020002	1.05027077493143	0.0149168289823302	0.0262196098245697
RNASEH1	21	Inverse variance weighted	0.0262804208636939	0.0107991989909593	1.02662879624603	1.00512708961206	1.04859046798587	0.0149514549198057	0.0262196098245697
MAPK3	21	Inverse variance weighted	0.0266414647966422	0.0109536152131965	1.02699952126429	1.00518577882399	1.04928664819656	0.0150071082465239	0.0262196098245697
GCA	21	Inverse variance weighted	0.0266442148528753	0.0109549072713887	1.02700234557461	1.00518599757473	1.04929219105773	0.0150085928948404	0.0262196098245697
SRI	21	Inverse variance weighted	0.0266371962727341	0.0109590792421731	1.02699513750163	1.00517072324334	1.04929340664518	0.0150736245688285	0.0262196098245697
ACRV1	21	Inverse variance weighted	0.0260109504414875	0.0107023282212765	1.02635218742148	1.00504708094759	1.04810892205336	0.0150821209852323	0.0262196098245697
CDH3	21	Inverse variance weighted	0.0276390336880085	0.0113792760112056	1.02802453521416	1.0053499126517	1.05121	0.0151450385547519	0.0262196098245697
OSTM1	21	Inverse variance weighted	0.0315566460289864	0.0129946339892891	1.03205983603124	1.00610572783829	1.05868347200189	0.0151640721215165	0.0262196098245697
VTA1	21	Inverse variance weighted	0.0266832077902049	0.0109913227320768	1.02704239219347	1.00515344880642	1.04940800493202	0.0151965316456657	0.0262196098245697
PLCG2	21	Inverse variance weighted	0.0265076008870244	0.0109191357223797	1.02686205229447	1.00511915318979	1.04907529728797	0.0151979179920394	0.0262196098245697
COL9A1	21	Inverse variance weighted	0.0266602029444557	0.0109822913929939	1.02701876551342	1.0051481180685	1.04936528831548	0.0152006515037754	0.0262196098245697
CD1D	21	Inverse variance weighted	0.0263291769294828	0.0108469581653581	1.02667885184741	1.00508200874722	1.04873976019584	0.0152102976187709	0.0262196098245697
FRRS1L	21	Inverse variance weighted	0.0288924065587851	0.0119043452805782	1.02931384109882	1.00557537468095	1.05361269791809	0.0152222799529084	0.0262196098245697
STUB1	21	Inverse variance weighted	0.0263737840023001	0.0108680283619886	1.02672465000717	1.00508533505899	1.04882985569625	0.0152355374069325	0.0262196098245697
TMEM230	21	Inverse variance weighted	0.0263028153425196	0.0108395241159149	1.02665178732031	1.00507015804583	1.04869683371887	0.0152424982629458	0.0262196098245697
PGAM1	21	Inverse variance weighted	0.0270532410048405	0.0111494643338329	1.02742250231377	1.00521383589241	1.05012183534416	0.0152487710224938	0.0262196098245697
LAP3	21	Inverse variance weighted	0.0265359284041324	0.0109402032212263	1.02689114115883	1.00510612212493	1.04914833625838	0.0152855238408411	0.0262196098245697
KCNF1	21	Inverse variance weighted	0.0262961672988955	0.0108414615465209	1.02664496211712	1.00505965973318	1.04869384422442	0.0152865298096671	0.0262196098245697
PBK	21	Inverse variance weighted	0.0263504061503257	0.0108653056512878	1.02670064767084	1.00506720213731	1.04879973964539	0.0153004716545473	0.0262196098245697
HSPA13	21	Inverse variance weighted	0.0281253566749461	0.0116043261188993	1.02852460876555	1.00539538040429	1.05218592750141	0.0153634680161745	0.0262196098245697
HAT1	21	Inverse variance weighted	0.0269024144769945	0.0111011345672945	1.02726755143076	1.00515744479161	1.04986400656996	0.0153762720180763	0.0262196098245697
EZR	21	Inverse variance weighted	0.0264311152914546	0.0109112981462951	1.02678351514235	1.00505771821809	1.04897894703726	0.0154199762142215	0.0262196098245697
STMN4	21	Inverse variance weighted	0.0266307937152615	0.0109952406327835	1.02698856212729	1.00509304777393	1.04936106072591	0.0154341109212842	0.0262196098245697
UCN3	21	Inverse variance weighted	0.0254987704947777	0.0105315600409676	1.02582664501045	1.00486872673417	1.04722166947462	0.0154703443672769	0.0262196098245697
VPS4A	21	Inverse variance weighted	0.0267460264403075	0.0110540148689079	1.02710691163663	1.00509308317556	1.0496028930959	0.0155386235189393	0.0262196098245697
MVK	21	Inverse variance weighted	0.0270558546055825	0.0111835378979172	1.02742518758949	1.00514933280227	1.05019471400371	0.0155522392823373	0.0262196098245697
CBX5	21	Inverse variance weighted	0.0263119907362503	0.0108782098763056	1.0266612072979	1.005	1.04878597619719	0.0155726779967241	0.0262196098245697
DKK1	21	Inverse variance weighted	0.0303776713246304	0.012567176101515	1.03084378058134	1.00576254612348	1.05655047909567	0.0156394180564869	0.0262196098245697
DDX39B	21	Inverse variance weighted	0.0265560803785387	0.010988470760893	1.02691183525134	1.00503129234419	1.04926873960271	0.0156609677181674	0.0262196098245697
UBE2L3	21	Inverse variance weighted	0.026685884637522	0.011051166399574	1.02704514143282	1.00503824799603	1.04953391041982	0.0157456979057629	0.0262196098245697
G3BP1	21	Inverse variance weighted	0.0264778591350659	0.0109653729587039	1.02683151207218	1.00499817755974	1.04913917032626	0.0157490693093568	0.0262196098245697
AMMECR1L	21	Inverse variance weighted	0.026389638354602	0.0109296308294085	1.02674092819053	1.0049799207206	1.04897313059315	0.0157566460098363	0.0262196098245697
HHLA2	21	Inverse variance weighted	0.0291010711581592	0.0120531149697278	1.02952864486929	1.00549199181454	1.05413990288835	0.0157610397317151	0.0262196098245697
TCEAL8	21	Inverse variance weighted	0.026860069111194	0.0111261988668075	1.02722405233152	1.00506550584506	1.04987112536628	0.0157729167136429	0.0262196098245697
CDC37	21	Inverse variance weighted	0.026089853760121	0.0108097144784	1.02643317321014	1.00491485183805	1.04841226810331	0.015797689930053	0.0262196098245697
DLK1	21	Inverse variance weighted	0.0290070606933059	0.0120185431128627	1.02943186295213	1.00546559837283	1.05396938709399	0.0157990208045677	0.0262196098245697
HN1	21	Inverse variance weighted	0.0265186335433006	0.0109920307569116	1.02687338137303	1.00498664539619	1.04923676966552	0.0158421166770418	0.0262196098245697
UGT1A8	21	Inverse variance weighted	0.0290158222816177	0.0120274716417396	1.02944088244982	1.00545681232273	1.05399706627967	0.0158451746534735	0.0262196098245697
KCTD5	21	Inverse variance weighted	0.0266806770359776	0.0110603684139654	1.02703979300488	1.00501	1.04954737429102	0.0158532135880204	0.0262196098245697
PDXK	21	Inverse variance weighted	0.0263853859454985	0.0109398254842436	1.02673656207734	1.00495556640006	1.04898963014125	0.0158711419914995	0.0262196098245697
HDAC2	21	Inverse variance weighted	0.0265241369971253	0.011004233415236	1.02687903273882	1.0049681399872	1.04926763936222	0.0159368938632647	0.0262196098245697
FAM150B	21	Inverse variance weighted	0.026060170521238	0.0108160132846156	1.02640270580125	1.00487261726071	1.04839409133067	0.015978498586376	0.0262196098245697
IGFBPL1	21	Inverse variance weighted	0.0264272214420221	0.010970605368916	1.02677951700973	1.00493698185079	1.04909680466636	0.0160001613540549	0.0262196098245697
TPST1	21	Inverse variance weighted	0.0269806964082533	0.0112007992903902	1.02734797106626	1.00503978701703	1.05015131469226	0.0160042397796061	0.0262196098245697
LILRB3	21	Inverse variance weighted	0.0300801401168433	0.0124886702238543	1.03053711800937	1.00561806896835	1.05607365695463	0.0160140878820085	0.0262196098245697
KIF3A	21	Inverse variance weighted	0.0271555654841154	0.0112792006974119	1.0275276381652	1.00506109641621	1.05049638371053	0.0160586922987096	0.0262196098245697
GRN	21	Inverse variance weighted	0.0268360778370142	0.0111466583795436	1.02719940821325	1.00500109133217	1.04988803826574	0.0160601978542957	0.0262196098245697
ACAN	21	Inverse variance weighted	0.0262510376130091	0.010909987938299	1.02659863099793	1.00487932658701	1.04878737305336	0.0161217645263634	0.0262196098245697
GCKR	21	Inverse variance weighted	0.0276939444082044	0.0115106660669021	1.02808098633164	1.00514623553125	1.05153904685123	0.0161310193033151	0.0262196098245697
CPA2	21	Inverse variance weighted	0.0256503345877544	0.0106639391425385	1.02598213527853	1.00476030830681	1.04765219446672	0.016157694140701	0.0262196098245697
TMEFF1	21	Inverse variance weighted	0.0265547613292022	0.0110449776366674	1.02691048070485	1.00491866226018	1.04938357200938	0.0162061928044045	0.0262196098245697
IDI1	21	Inverse variance weighted	0.0264558561880184	0.0110071498095847	1.02680891900135	1.00489377816931	1.04920199432569	0.0162382745337662	0.0262196098245697
LYZL2	21	Inverse variance weighted	0.0285730939186067	0.011891487055495	1.02898522064777	1.00527966787297	1.05324977531061	0.0162692270186908	0.0262196098245697
USP8	21	Inverse variance weighted	0.0261948626831445	0.0109037542596591	1.02654096351158	1.00483515615792	1.04871564585433	0.0162891800532821	0.0262196098245697
RPRD1B	21	Inverse variance weighted	0.0259464626636838	0.0108011372954051	1.02628600238376	1.00478765794949	1.0482443234208	0.0162969167265112	0.0262196098245697
C5	21	Inverse variance weighted	0.0270696169658907	0.0112714826861873	1.02743932748241	1.00498991928743	1.05039020929283	0.0163234512159033	0.0262196098245697
PPP2R5A	21	Inverse variance weighted	0.0256658265053926	0.0106874316268353	1.02599802983238	1.00472960998082	1.04771666601925	0.016328178381595	0.0262196098245697
BRSK2	21	Inverse variance weighted	0.0277793051694971	0.0115693249568797	1.02816874785295	1.00511647292539	1.05174972506889	0.0163451004552127	0.0262196098245697
ARF3	21	Inverse variance weighted	0.0269522244119608	0.0112264848852933	1.02731872083505	1.00496057716161	1.05017428361117	0.0163605512370485	0.0262196098245697
APOA1	21	Inverse variance weighted	0.0270839562223023	0.011287683059328	1.02745	1.00497241907302	1.05043862498128	0.0164208143390164	0.0262196098245697
PAPPA	21	Inverse variance weighted	-0.0272982	0.0113804922937846	0.973071026712291	0.951606217628161	0.995020004584396	0.0164541191245271	0.0262196098245697
PTPN6	21	Inverse variance weighted	0.0323937825997839	0.013507371192609	1.03292417279672	1.00593688894474	1.0606354717412	0.016474517784678	0.0262196098245697
KLK7	21	Inverse variance weighted	0.0275836335421317	0.0115018257979685	1.02796758408251	1.00505277742016	1.05140483929301	0.0164760428369047	0.0262196098245697
TBX22	21	Inverse variance weighted	0.0257488231341502	0.0107380485231222	1.02608318774383	1.00471332094616	1.04790758340803	0.016489129038046	0.0262196098245697
PSMD4	21	Inverse variance weighted	0.0261665111648062	0.0109134731056185	1.0265118599292	1.00478752764171	1.04870589013825	0.0165013565389943	0.0262196098245697
SEPW1	21	Inverse variance weighted	0.0265384443475751	0.0110707168713268	1.02689372476211	1.00485157021955	1.04942	0.016522036254879	0.0262196098245697
ANXA6	21	Inverse variance weighted	0.029462988684529	0.0122917776099815	1.02990131676395	1.00538555481078	1.05501488179999	0.0165314000710467	0.0262196098245697
FAM19A4	21	Inverse variance weighted	0.0269757543407499	0.0112563054007814	1.02734289385579	1.00492548627787	1.05026037847362	0.0165524194631042	0.0262196098245697
MYC	21	Inverse variance weighted	0.0258571910038451	0.0107919993920743	1.02619438821819	1.00471595748471	1.04813197657064	0.0165769321717379	0.0262196098245697
PRDM4	21	Inverse variance weighted	0.0263253342404117	0.0109876120360931	1.02667490664739	1.00480110318848	1.04902488720864	0.016579141330509	0.0262196098245697
PCNP	21	Inverse variance weighted	0.0259908414633101	0.0108492415222883	1.02633154873525	1.00473751478525	1.0483896862898	0.0165915248933584	0.0262196098245697
SLITRK5	21	Inverse variance weighted	0.0265734855968947	0.0110955852826612	1.02692970903161	1.0048378030064	1.04950731763525	0.0166221676260622	0.0262196098245697
FZD10	21	Inverse variance weighted	0.0257166233421941	0.0107402520946362	1.02605014861059	1.00467663069919	1.04787836732217	0.0166468903533096	0.0262196098245697
PMVK	21	Inverse variance weighted	0.0267721352201327	0.011182423341562	1.02713372849492	1.00486638806188	1.04989450214043	0.0166600051671872	0.0262196098245697
LRP1	21	Inverse variance weighted	0.0255289155213283	0.0106634949589928	1.02586	1.00463919329253	1.04752408526296	0.0166635817807833	0.0262196098245697
CST6	21	Inverse variance weighted	0.027148931807392	0.0113495931421199	1.02752082190164	1.0049157722062	1.0506343602544	0.0167540065476289	0.0262196098245697
SCGB1D2	21	Inverse variance weighted	0.0260857632530787	0.0109063514939085	1.0264289745866	1.00472042057315	1.04860657581727	0.0167661778139387	0.0262196098245697
TMEM108	21	Inverse variance weighted	0.029593934736841	0.0123759490218004	1.03003618710582	1.00535134220808	1.05532713013269	0.0167913122102785	0.0262196098245697
RLN3	21	Inverse variance weighted	0.0325780484059082	0.0136243365606287	1.03311452293905	1.00589163656866	1.06107415421853	0.0167949639131274	0.0262196098245697
SMAP1	21	Inverse variance weighted	0.0261107356608628	0.0109221960023322	1.02645460730957	1.0047143090495	1.04866532841937	0.0168203061275561	0.0262196098245697
SPG20	21	Inverse variance weighted	0.0262669081180642	0.0109892711757861	1.02661492376598	1.0047391309409	1.04896700968743	0.0168377307431203	0.0262196098245697
ARSK	21	Inverse variance weighted	0.0262803474792697	0.0109987206205455	1.02662872090747	1.00473402532122	1.0490005354951	0.0168758988686216	0.0262196098245697
MUTED	21	Inverse variance weighted	0.0308663662241085	0.0129216212409039	1.03134767179358	1.00555536270643	1.05780154883881	0.0169063592444344	0.0262196098245697
ZNF566	21	Inverse variance weighted	0.0257163995985554	0.0107693002849253	1.02604991903842	1.00461920683595	1.04793779493274	0.0169432931070095	0.0262196098245697
LRRC74A	21	Inverse variance weighted	0.0259341626007087	0.0108694139303865	1.02627337907893	1.00464084682496	1.04837171605624	0.0170338548604006	0.0262196098245697
NUDC	21	Inverse variance weighted	0.026591949424066	0.0111550891599728	1.02694867025932	1.00473916917826	1.04964910665315	0.0171330426078984	0.0262196098245697
SNX1	21	Inverse variance weighted	0.0253527397371833	0.0106353040191991	1.02567685370566	1.0045177181166	1.04728168478699	0.0171335897750316	0.0262196098245697
IFNA7	21	Inverse variance weighted	0.0253671210569256	0.0106441273638726	1.02569160439851	1.00451479252748	1.04731485803859	0.0171627061913505	0.0262196098245697
AGO3	21	Inverse variance weighted	0.025811905196339	0.0108335796383199	1.02614791722891	1.00458858456543	1.04816993166284	0.0171916451419192	0.0262196098245697
ENTPD1	21	Inverse variance weighted	0.026169681598435	0.0109863297879143	1.02651511442208	1.00464724029624	1.0488589804181	0.0172178588083979	0.0262196098245697
MARCO	21	Inverse variance weighted	0.0287330910554462	0.0120650376047869	1.02914986850816	1.00509857105186	1.05377669649052	0.0172414992270125	0.0262196098245697
CCDC50	21	Inverse variance weighted	0.0298259110300186	0.0125339735716981	1.03027515879916	1.00527317734561	1.0558989603616	0.0173311864621498	0.0262196098245697
JMJD6	21	Inverse variance weighted	0.0262886968401804	0.0110535677324116	1.02663729263697	1.0046344098982	1.04912206893229	0.0173926832302984	0.0262196098245697
CRK	21	Inverse variance weighted	0.0259801368895713	0.0109247204759442	1.02632056235231	1.00457813253006	1.04853357105665	0.0174018504542736	0.0262196098245697
UFD1L	21	Inverse variance weighted	0.0259059219646	0.0108953462675723	1.02624439687512	1.00456141500572	1.04839539562804	0.0174207450220051	0.0262196098245697
ERCC1	21	Inverse variance weighted	0.0283414932653256	0.0119245266749344	1.02874693459312	1.00498178903377	1.05307406261784	0.0174664195881822	0.0262196098245697
TERF1	21	Inverse variance weighted	0.0263559481720129	0.0110917971371973	1.02670633768387	1.00462669604187	1.0492712447254	0.0174936039170784	0.0262196098245697
MAPRE1	21	Inverse variance weighted	0.0261424912706343	0.0110060434216845	1.02648720351908	1.00458110749959	1.0488709882381	0.0175353986554327	0.0262196098245697
NPM1	21	Inverse variance weighted	0.0254983120058692	0.0107373663170487	1.02582617468042	1.0044630036923	1.04764370294501	0.017561941372935	0.0262196098245697
WFDC5	21	Inverse variance weighted	0.0271486928308775	0.0114366729681407	1.02752057634832	1.00474403126634	1.05081344299055	0.0176047561721206	0.0262196098245697
DAPP1	21	Inverse variance weighted	0.0263153255325883	0.011085691204504	1.02666463100964	1.00459790886494	1.04921606472094	0.0176056034811713	0.0262196098245697
CEACAM21	21	Inverse variance weighted	0.0263034978186885	0.0110812828482296	1.02665248798592	1.00459470687937	1.04919458948957	0.0176114692679763	0.0262196098245697
NRCAM	21	Inverse variance weighted	0.0265410134614897	0.0111825129584263	1.02689636297246	1.00463399194859	1.04965206108617	0.0176232991361033	0.0262196098245697
GPD1L	21	Inverse variance weighted	0.0268802541478278	0.0113269094616432	1.02724478709591	1.00469047761595	1.05030541856005	0.0176379472720774	0.0262196098245697
RHOA	21	Inverse variance weighted	0.0258356704318329	0.0108911506822731	1.02617230416559	1.00449910581632	1.04831312615331	0.017683910324108	0.0262196098245697
RNF122	21	Inverse variance weighted	0.0262232056611373	0.0110557190834989	1.02657005915185	1.00456438145717	1.0490577864391	0.0176962490306951	0.0262196098245697
ST8SIA6	21	Inverse variance weighted	0.0272362144913782	0.0114838968254995	1.0276105105909	1.00473897028301	1.05100269095709	0.0177070601239755	0.0262196098245697
CXCL10	21	Inverse variance weighted	0.0263925087123311	0.0111316359431263	1.02674387530851	1.00458498127194	1.04939154490323	0.0177426187933542	0.0262196098245697
TTC1	21	Inverse variance weighted	0.0261029796274063	0.0110174718529835	1.02644664612417	1.00451891443363	1.04885304019744	0.0178249249750106	0.0262196098245697
NEURL4	21	Inverse variance weighted	0.0254638032501244	0.0107550054986382	1.02579077530632	1.00439361622614	1.04764377003629	0.0179027461893807	0.0262196098245697
MAPK14	21	Inverse variance weighted	0.0257350083649876	0.0108766333851527	1.02606901273936	1.00442657539833	1.04817778092581	0.017977453694773	0.0262196098245697
OAZ1	21	Inverse variance weighted	0.0264865760865288	0.0111958417375899	1.02684046295164	1.00455306010387	1.04962234274187	0.0179935316802961	0.0262196098245697
CRYGD	21	Inverse variance weighted	0.0288550531019704	0.0121998816250102	1.02927539338679	1.00495552330814	1.05418380302457	0.0180207628843865	0.0262196098245697
IL18R1	21	Inverse variance weighted	0.0252567812601209	0.0106796452383955	1.0255784360389	1.00433404150188	1.04727220725796	0.0180327138418759	0.0262196098245697
BTNL8	21	Inverse variance weighted	0.0288167912183718	0.0121853832035191	1.0292360121249	1.00494562959235	1.05411351366787	0.0180366244687467	0.0262196098245697
NFKB1	21	Inverse variance weighted	0.0254013018947074	0.0107438814295314	1.02572666399603	1.00435274006579	1.04755545264258	0.0180662521978674	0.0262196098245697
POTEG	21	Inverse variance weighted	0.025327361273321	0.0107206332658278	1.02565082393299	1.00432424274395	1.04743026989005	0.0181527573035039	0.0262196098245697
CFAP45	21	Inverse variance weighted	0.0251663431071052	0.010657127043482	1.02548568881337	1.00428753941057	1.04713128132432	0.018203301942904	0.0262196098245697
DECR2	21	Inverse variance weighted	0.0256762717775033	0.0108735791161465	1.02600874671696	1.0043735930727	1.04810994195813	0.0182087815644262	0.0262196098245697
AKR7A3	21	Inverse variance weighted	0.0261264648141383	0.0110708278832734	1.02647075269839	1.00443745865311	1.04898736807176	0.0182780011288824	0.0262196098245697
STMN1	21	Inverse variance weighted	0.0270627968999913	0.011467858516222	1.02743232030238	1.00459632505373	1.05078741229267	0.0182807316238391	0.0262196098245697
IGHG2	21	Inverse variance weighted	0.0301623760397912	0.0127834392674776	1.03062186866513	1.00511989718366	1.05677087792913	0.0183001554027826	0.0262196098245697
OTUB2	21	Inverse variance weighted	0.0280847381161542	0.0119053912667716	1.02848283242671	1.0047614711818	1.05276423005384	0.018324587089691	0.0262196098245697
POMK	21	Inverse variance weighted	0.0253974292880247	0.0107677575679923	1.02572269176779	1.00430185096437	1.04760041953232	0.0183412797847688	0.0262196098245697
TBX5	21	Inverse variance weighted	0.0251750129659974	0.0106774261404894	1.02549457966813	1.00425629011284	1.04718202244026	0.0183846257917131	0.0262196098245697
ARRB1	21	Inverse variance weighted	0.0258931138214986	0.0109852990168035	1.02623125267421	1.00437145480248	1.04856682149772	0.0184197965530519	0.0262196098245697
CARD9	21	Inverse variance weighted	0.0254806931237887	0.0108126975984913	1.02580810092923	1.00429701162301	1.04777993736283	0.0184454437088307	0.0262196098245697
ERBB3	21	Inverse variance weighted	0.0313194233675261	0.0132925440089039	1.03181503708723	1.00527992705445	1.05905	0.0184647273586024	0.0262196098245697
CSRP3	21	Inverse variance weighted	0.0262012637649729	0.01112453123115	1.02654753450532	1.00440686434478	1.04917626313356	0.0185093002220498	0.0262196098245697
PVRIG	21	Inverse variance weighted	0.0292727724149904	0.0124289190602893	1.02970543140836	1.00492417515406	1.05509778915342	0.0185120081722714	0.0262196098245697
LRP12	21	Inverse variance weighted	0.0301274139690448	0.0127923180874271	1.03058583662033	1.00506726590268	1.05675232163542	0.0185168426072035	0.0262196098245697
TOX3	21	Inverse variance weighted	0.0257753928558	0.0109540560949176	1.02611045085071	1.00431472464497	1.04837918981746	0.0186203534065665	0.0262196098245697
GLA	21	Inverse variance weighted	0.0267248646730284	0.0113608798622025	1.02708517646918	1.00446748975328	1.05021214771404	0.0186547754519779	0.0262196098245697
IL2RA	21	Inverse variance weighted	0.0248051614262884	0.010545265899018	1.02511536904902	1.00414500714129	1.0465236717675	0.0186599445646253	0.0262196098245697
IL32	21	Inverse variance weighted	0.0248621103749156	0.010575559568587	1.02517374995386	1.00414257044207	1.04664541523398	0.0187279359215981	0.0262196098245697
ANTXR1	21	Inverse variance weighted	-0.0644098	0.0274009421175444	0.937620716643713	0.88859331501884	0.989353164626083	0.0187411294951078	0.0262196098245697
ESRP1	21	Inverse variance weighted	0.0292761312115896	0.0124549091615613	1.02970888998527	1.00487636018861	1.0551550818806	0.0187447002152246	0.0262196098245697
MRPL52	21	Inverse variance weighted	0.0256192770559068	0.0109019818144752	1.0259502713005	1.00426044268995	1.04810855275968	0.0187751701195097	0.0262196098245697
DIDO1	21	Inverse variance weighted	0.0303604345427111	0.0129260841913708	1.03082601230504	1.00503795757345	1.05727575723631	0.0188353976197071	0.0262196098245697
APBB2	21	Inverse variance weighted	0.0254359524453293	0.0108339634930827	1.02576220660551	1.00421022218584	1.04777673165876	0.0188847850264764	0.0262196098245697
KAT2B	21	Inverse variance weighted	0.0259794501039759	0.0110678981627365	1.02631985749038	1.00429556932727	1.04882714018608	0.0189110644395344	0.0262196098245697
UCK2	21	Inverse variance weighted	0.0280267215766167	0.0119483663067084	1.02842316514266	1.00461855642094	1.05279182814426	0.0189937799580612	0.0262196098245697
PTPN2	21	Inverse variance weighted	0.0252341497358947	0.0107604215819711	1.02555522589832	1.00415232052774	1.04741432137963	0.0190225218796408	0.0262196098245697
ZDHHC14	21	Inverse variance weighted	0.0302361263191391	0.012895726900457	1.03069788011875	1.00497282525102	1.05708143880997	0.0190443134716007	0.0262196098245697
STC2	21	Inverse variance weighted	0.0251482650146695	0.0107258784029225	1.02546715015587	1.00413406511383	1.04725346204602	0.0190457375327352	0.0262196098245697
RNASE13	21	Inverse variance weighted	0.0249715236287278	0.0106508882942992	1.0252859236861	1.0041041817525	1.04691449793003	0.0190501353301153	0.0262196098245697
C6orf89	21	Inverse variance weighted	0.0289187805352666	0.0123410832987695	1.02934098855584	1.00474146259766	1.05454279549864	0.0191143389456103	0.0262196098245697
MRPL14	21	Inverse variance weighted	0.0285200404021075	0.0121731396014376	1.02893063081149	1.00467156467686	1.05377546279281	0.0191362313431123	0.0262196098245697
TXNL4B	21	Inverse variance weighted	0.0271484280351621	0.0115910300043548	1.02752030426531	1.00443983622337	1.05113112563039	0.0191708042935581	0.0262196098245697
RB1	21	Inverse variance weighted	0.0255864718839993	0.0109243078262303	1.02591661537753	1.00418355528126	1.04812003360569	0.0191725169533818	0.0262196098245697
XCL1	21	Inverse variance weighted	0.0273511603974445	0.0116785428928023	1.02772863700107	1.00447118236782	1.05152459309211	0.019180657970053	0.0262196098245697
ITGA5	21	Inverse variance weighted	0.0257232498247391	0.0109837642385661	1.02605694773651	1.00420388354885	1.04838556915137	0.0191841121735778	0.0262196098245697
CUZD1	21	Inverse variance weighted	0.0256265389379937	0.0109440928749346	1.02595772165745	1.00418484903055	1.04820267667324	0.019201981402085	0.0262196098245697
METTL1	21	Inverse variance weighted	0.0256575853074997	0.0109578740766965	1.02598957441442	1.00418890113954	1.04826353449292	0.0192077259006822	0.0262196098245697
IL21	21	Inverse variance weighted	0.0256443145172796	0.010954117480689	1.02597595881236	1.00418296854757	1.04824190514149	0.0192287556895023	0.0262196098245697
DDX6	21	Inverse variance weighted	0.0254321075487057	0.0108667899637159	1.02575826266345	1.00414175266803	1.04784011881457	0.0192656013533486	0.0262196098245697
MCM6	21	Inverse variance weighted	0.0273332677946597	0.0116818849078158	1.02771024842531	1.00444663042678	1.0515126665014	0.019294097736606	0.0262196098245697
AKR7A2	21	Inverse variance weighted	0.0254183942641753	0.0108804775623277	1.02574419624498	1.00410104460469	1.0478538607083	0.0194835850611194	0.0262196098245697
PTGR2	21	Inverse variance weighted	0.0252242380718067	0.0108016991656982	1.02554506098979	1.00406113184428	1.04748868247562	0.0195324425381614	0.0262196098245697
MASP1	21	Inverse variance weighted	0.0249435927930036	0.0106831973642115	1.02525728699332	1.00401255478687	1.04695155406303	0.0195516033528764	0.0262196098245697
HSP90AB1	21	Inverse variance weighted	0.025380300666344	0.0108724770183892	1.02570512270232	1.00407854041038	1.04779751423409	0.0195767580996407	0.0262196098245697
MPP6	21	Inverse variance weighted	0.0254509420635069	0.0109045521465297	1.02577758250457	1.00408634629389	1.0479374136026	0.0195970791930663	0.0262196098245697
KLK15	21	Inverse variance weighted	0.0256338147709665	0.0109831452384558	1.02596518638162	1.00411529476885	1.0482905390953	0.0195997566237973	0.0262196098245697
BMP6	21	Inverse variance weighted	0.0254749890067569	0.0109156353802293	1.02580224961646	1.00408867959768	1.0479853788809	0.0196058169279584	0.0262196098245697
VCAM1	21	Inverse variance weighted	0.026496854953598	0.0113556973053399	1.0268510177625	1.00424868842814	1.04996205106355	0.0196296047401105	0.0262196098245697
CDHR5	21	Inverse variance weighted	0.0254246055967902	0.0108978866520411	1.02575056750315	1.00407302005042	1.04789612480593	0.0196489349786702	0.0262196098245697
HNRNPH1	21	Inverse variance weighted	0.0255428956168713	0.0109493005765106	1.02587191073508	1.00409061028675	1.0481257034509	0.0196568836325375	0.0262196098245697
PLBD1	21	Inverse variance weighted	0.0260601118631262	0.0111719928184907	1.0264026455944	1.00417168328521	1.04912577044255	0.019667637623118	0.0262196098245697
MCEMP1	21	Inverse variance weighted	0.0253778642965633	0.0108819853656293	1.0257026237084	1.00405738195696	1.04781448868168	0.0196954976339235	0.0262196098245697
PABPN1	21	Inverse variance weighted	0.0256925644290657	0.0110248791824872	1.02602546325615	1.00409215131046	1.04843788478583	0.0197841290337886	0.0262196098245697
SCIN	21	Inverse variance weighted	0.0255709101703381	0.0109728963642722	1.02590065048114	1.00407230267823	1.0482035425639	0.019786595909939	0.0262196098245697
PPBP	21	Inverse variance weighted	0.0258600420880764	0.0110972046791596	1.0262	1.00411797657694	1.04876214927274	0.0197892250533877	0.0262196098245697
GAGE2D	21	Inverse variance weighted	0.0250301807508495	0.0107440861890493	1.0253460657716	1.00397966975882	1.0471671750543	0.0198235723331372	0.0262196098245697
KPNA1	21	Inverse variance weighted	0.0251669845167498	0.0108106389208203	1.02549	1.00398605550309	1.04744706486438	0.0199130020094254	0.0262196098245697
FASN	21	Inverse variance weighted	0.0260906051364275	0.011213414113325	1.02643394444799	1.00412078063793	1.04924294231389	0.019979554058204	0.0262196098245697
HSPC159	21	Inverse variance weighted	0.0261162169111503	0.0112285924957499	1.0264602335796	1.00411662574051	1.04930103148454	0.0200256271759502	0.0262196098245697
CACYBP	21	Inverse variance weighted	0.0249635605090784	0.0107346952050584	1.02527775924412	1.00393126513711	1.04707814180593	0.0200451065267298	0.0262196098245697
NOV	21	Inverse variance weighted	0.0252698121152951	0.0108683324515785	1.02559180029004	1.00397576297018	1.04767324034834	0.0200673400190311	0.0262196098245697
APOA5	21	Inverse variance weighted	-0.0507586	0.02183379091433	0.950508062277236	0.910689872407486	0.992067227085372	0.0200840344721919	0.0262196098245697
ADCYAP1	21	Inverse variance weighted	0.0248039948874337	0.0106698274843798	1.02511417321281	1.00389871330491	1.04677798088043	0.0200887749210782	0.0262196098245697
TDO2	21	Inverse variance weighted	0.0258396527184755	0.0111178757309991	1.02617639068599	1.00405682300418	1.0487832567589	0.0201172544110255	0.0262196098245697
TRABD	21	Inverse variance weighted	0.0295380226178784	0.0127125251912511	1.02998	1.00463216872043	1.0559645049609	0.0201503224961363	0.0262196098245697
HSD17B8	21	Inverse variance weighted	0.0277478002095264	0.0119438079751169	1.02813635594796	1.00434735904494	1.05248881963222	0.0201686557025546	0.0262196098245697
MAPK1	21	Inverse variance weighted	0.0253322363977115	0.0109053134139673	1.02565582412052	1.00396566462727	1.04781458830358	0.0201831264890712	0.0262196098245697
UBQLN2	21	Inverse variance weighted	0.0254108153045491	0.0109398198388984	1.02573642220059	1.0039766544108	1.04796780204648	0.0201908729183751	0.0262196098245697
ACOT8	21	Inverse variance weighted	0.0335833446529859	0.0144660360686975	1.03415363131013	1.00524361383098	1.06389507820513	0.020258227325837	0.0262196098245697
TNFAIP3	21	Inverse variance weighted	0.0258834622431103	0.0111522059691166	1.02622134797063	1.00403325029378	1.04889977968609	0.0202907535606809	0.0262196098245697
ADAMTS15	21	Inverse variance weighted	0.0266007246793376	0.0114625032497446	1.02695768203559	1.00414277597938	1.05029096052928	0.0203044854571632	0.0262196098245697
JTB	21	Inverse variance weighted	0.025282551178633	0.0108990704233757	1.02560486545216	1.00392806786373	1.0477497080816	0.0203572235128228	0.0262196098245697
NID2	21	Inverse variance weighted	0.0251567188618903	0.0108468013908594	1.02547581933513	1.0039045912673	1.04751055547376	0.020380112265502	0.0262196098245697
SYTL4	21	Inverse variance weighted	0.0250763327367786	0.010815504911072	1.02539338862081	1.0038854720616	1.04736210522902	0.020419228942751	0.0262196098245697
GRAMD1C	21	Inverse variance weighted	0.0274712646292551	0.0118523136994779	1.02785207897233	1.00424973439702	1.05200913683296	0.0204603218562628	0.0262196098245697
RBM24	21	Inverse variance weighted	0.0251289386612687	0.0108445249696236	1.02544733180684	1.00388118207636	1.0474767821973	0.0204928124147091	0.0262196098245697
PLG	21	Inverse variance weighted	0.025734953434499	0.0111062208536976	1.02606895637689	1.00397463856921	1.04864950049014	0.0204947100594337	0.0262196098245697
MRRF	21	Inverse variance weighted	0.0248316376907408	0.0107194412080203	1.02514251063393	1.00382884429054	1.04690871664638	0.0205307192067549	0.0262196098245697
OAS1	21	Inverse variance weighted	0.0282005076222568	0.0121803971926161	1.02860190626868	1.00433630379886	1.05345378592573	0.0205999592632071	0.0262196098245697
ADH5	21	Inverse variance weighted	0.0255780571067005	0.011048935042793	1.02591	1.00393	1.04836726665693	0.020614059016784	0.0262196098245697
ARL4D	21	Inverse variance weighted	0.0249151716536902	0.0107666773868084	1.02522814842721	1.00381976073715	1.04709311117328	0.0206622195319044	0.0262196098245697
INHBA	21	Inverse variance weighted	0.0254889429128942	0.0110161801953133	1.02581656366464	1.00390483380493	1.04820654991806	0.0206801641323117	0.0262196098245697
ROS1	21	Inverse variance weighted	0.0249283920096434	0.0107795287501542	1.02524170239786	1.00380774677674	1.0471333297744	0.0207464089027817	0.0262196098245697
MPST	21	Inverse variance weighted	0.0259744687360072	0.0112364914611214	1.02631474502624	1.00395876074646	1.04916854859171	0.0207987790609396	0.0262196098245697
TMPRSS11A	21	Inverse variance weighted	0.0246598268258859	0.0106684547028815	1.02496639514229	1.00375669436171	1.0466242637007	0.0208068368209579	0.0262196098245697
NLGN4X	21	Inverse variance weighted	0.0266339818953836	0.0115272298363364	1.02699183635703	1.00404878569246	1.05045914797516	0.0208589661321177	0.0262196098245697
GSN	21	Inverse variance weighted	0.0256248248080483	0.0110913298236547	1.0259559630341	1.00389337793437	1.04850341801342	0.0208689297468454	0.0262196098245697
VEGFC	21	Inverse variance weighted	0.0251069603022804	0.010879337843703	1.02542479440492	1.00379062444129	1.04752523422466	0.0210121839765647	0.0262196098245697
TAGLN2	21	Inverse variance weighted	0.0253699366365272	0.0109941659881968	1.02569449231893	1.00382868204836	1.04803659268495	0.0210224113137302	0.0262196098245697
ZPBP	21	Inverse variance weighted	0.0252001335816733	0.0109231469024787	1.02552034104692	1.00379795969237	1.04771279892151	0.0210526068716896	0.0262196098245697
RNF8	21	Inverse variance weighted	0.0257256326735018	0.011154104429657	1.02605939267796	1.00387106126891	1.04873814767795	0.0210892618786362	0.0262196098245697
SEMA6C	21	Inverse variance weighted	0.0253531737204486	0.0109930073461355	1.02567729883234	1.00381413469096	1.04801664469876	0.0210938706888656	0.0262196098245697
TBCE	21	Inverse variance weighted	0.025553496350491	0.0110801674643326	1.02588278578758	1.00384373640004	1.04840569504323	0.0210973721383372	0.0262196098245697
ACBD6	21	Inverse variance weighted	0.025659412135645	0.0111298049003367	1.02599144872277	1.00385239600563	1.04861875813697	0.0211403613933668	0.0262196098245697
SUN3	21	Inverse variance weighted	0.0276674083292779	0.0120013045817915	1.02805370545541	1.00415345312557	1.05252281711611	0.0211460430264447	0.0262196098245697
FAAH2	21	Inverse variance weighted	0.0244073801746437	0.0105884318622235	1.02470767846565	1.00366073791798	1.04619597702373	0.0211610481221072	0.0262196098245697
ATOX1	21	Inverse variance weighted	0.0274212239967987	0.0118960886839233	1.02780064589111	1.00411332677781	1.05204675560285	0.0211630917946832	0.0262196098245697
CTNNB1	21	Inverse variance weighted	0.0261380560251271	0.0113418368527785	1.02648265080642	1.00391570220134	1.04955688022026	0.0211906723547356	0.0262196098245697
ZNF560	21	Inverse variance weighted	0.0240251482832217	0.0104285082166547	1.02431607735754	1.00359170695472	1.04546841017338	0.0212341367260439	0.0262196098245697
PURA	21	Inverse variance weighted	0.0251292264891116	0.0109163518453349	1.02544762695917	1.00374015385644	1.04762455860324	0.0213362852645268	0.0262196098245697
CETN3	21	Inverse variance weighted	0.0258863350114544	0.0112512904031579	1.02622429607106	1.0038411642554	1.04910651539949	0.0214061249415462	0.0262196098245697
LPO	21	Inverse variance weighted	0.0260254530054143	0.0113119840409291	1.02636707226762	1.00386140035526	1.04937730115174	0.0214087374969776	0.0262196098245697
CRIPT	21	Inverse variance weighted	0.0246877448527538	0.0107315043775175	1.02499501058109	1.0036606802558	1.04678283446189	0.0214203362481747	0.0262196098245697
LYN	21	Inverse variance weighted	0.0248230956583858	0.010790550850871	1.02513375387083	1.00368037198835	1.04704569567642	0.0214228807558687	0.0262196098245697
LY6G6C	21	Inverse variance weighted	0.0262006835697206	0.0113915043260875	1.02654693890749	1.00388084614743	1.04972479734469	0.0214471079266286	0.0262196098245697
HGS	21	Inverse variance weighted	0.0258698246224695	0.0112494464363832	1.02620735284862	1.00382821858829	1.04908540280086	0.0214678799153144	0.0262196098245697
ADAM11	21	Inverse variance weighted	0.0285787254029979	0.012429681718901	1.02899101537829	1.0042254513854	1.05436733182627	0.0214917530896616	0.0262196098245697
FLRT1	21	Inverse variance weighted	0.0250032752953565	0.0108782254929515	1.02531847873978	1.00368874004623	1.04741434361098	0.0215350516274269	0.0262196098245697
PPT1	21	Inverse variance weighted	0.0255781087793573	0.0111369966419217	1.02590803556539	1.00375663388834	1.0485482854151	0.0216370756244042	0.0262196098245697
PPID	21	Inverse variance weighted	0.0252946269427502	0.0110189513730266	1.02561725048937	1.00370432637186	1.04800857868542	0.0217012446298868	0.0262196098245697
DEFB106A	21	Inverse variance weighted	0.024880044955629	0.0108391598961562	1.0251921361801	1.00364190724574	1.04720509227218	0.0217110706512164	0.0262196098245697
TMEM8B	21	Inverse variance weighted	0.0238782433675509	0.0104057063990445	1.02416561134294	1.00348913172352	1.04526812129587	0.0217488409213216	0.0262196098245697
CARS	21	Inverse variance weighted	0.0252437727309881	0.0110034569655256	1.02556509485871	1.00368376552563	1.04792345947903	0.0217808826125378	0.0262196098245697
CALCB	21	Inverse variance weighted	0.0245912951864171	0.0107190835806466	1.02489615492169	1.00358831400735	1.0466563965646	0.0217812971302343	0.0262196098245697
DPYSL3	21	Inverse variance weighted	0.0250615186465929	0.0109247153295035	1.02537819846319	1.00365574258655	1.04757080069509	0.021789333208549	0.0262196098245697
NLRP4	21	Inverse variance weighted	0.0250563896414254	0.0109236454367418	1.0253729393066	1.00365269949154	1.04756323098109	0.0218034007315708	0.0262196098245697
MAPKAPK2	21	Inverse variance weighted	0.0254365912474313	0.0110904571968674	1.02576286186477	1.00371	1.04830428008859	0.021815980997888	0.0262196098245697
RPE	21	Inverse variance weighted	0.0247921917091667	0.0108126065275286	1.02510207367888	1.00360596883349	1.0470586007795	0.021853942830485	0.0262196098245697
PTPN9	21	Inverse variance weighted	0.0249040401615404	0.0108633907724381	1.02521673617164	1.00361832463618	1.04727995725612	0.0218783100925896	0.0262196098245697
TFPI2	21	Inverse variance weighted	0.0251287947889243	0.0109627420270772	1.02544718427334	1.00364845990131	1.04771936564074	0.0218941180372627	0.0262196098245697
LMAN1	21	Inverse variance weighted	0.0270698843810707	0.0118155178658575	1.02743960223532	1.00391912914403	1.05151112833315	0.0219608050160703	0.0262196098245697
AGR2	21	Inverse variance weighted	0.0248320955446249	0.0108389331561082	1.02514297999951	1.00359423036888	1.04715441524211	0.0219628817519996	0.0262196098245697
NRIP3	21	Inverse variance weighted	0.0301961101923227	0.0131830352304186	1.03065663640688	1.00436686824237	1.05763455143485	0.0219907322992785	0.0262196098245697
LONP1	21	Inverse variance weighted	0.0251029354095935	0.010961098250163	1.02542066718847	1.00362573998961	1.04768889716613	0.0220106336436185	0.0262196098245697
HOPX	21	Inverse variance weighted	0.0302829414155762	0.0132260099121814	1.03074613346888	1.00436948045032	1.05781548756808	0.0220415797409243	0.0262196098245697
BMP3	21	Inverse variance weighted	0.0249505800518563	0.0108985313164637	1.0252644507564	1.00359590849318	1.04740083642137	0.0220588788981089	0.0262196098245697
CTCF	21	Inverse variance weighted	0.0311793131575525	0.0136205002990539	1.03167047939297	1.00449319684444	1.05958306277683	0.0220708735269726	0.0262196098245697
ACP6	21	Inverse variance weighted	0.0229831291100055	0.0100450133757118	1.02324927627562	1.00330033705285	1.04359486659219	0.0221367181499485	0.0262196098245697
KIR2DL1	21	Inverse variance weighted	0.0247372650606021	0.010812756890631	1.02504576980385	1.00355054987691	1.04700139950263	0.0221500338119858	0.0262196098245697
PDILT	21	Inverse variance weighted	0.0246797960046138	0.0107891423011359	1.02498686308378	1.00353932576811	1.04689277491961	0.0221686387440315	0.0262196098245697
PEA15	21	Inverse variance weighted	0.030118132005127	0.0131690897309126	1.03057627080417	1.00431600336216	1.0575231763599	0.0221939448186602	0.0262196098245697
CPN1	21	Inverse variance weighted	0.0256324606095611	0.0112140402562472	1.0259637970601	1.00365962183043	1.04876363458589	0.0222690548582391	0.0262196098245697
IGFL3	21	Inverse variance weighted	0.024935558931821	0.0109132240215607	1.02524905025168	1.00355193306616	1.04741526612423	0.0223190501559774	0.0262196098245697
FADD	21	Inverse variance weighted	0.0294520495094061	0.012893114219065	1.0298900505547	1.0041903005007	1.05624752171247	0.0223524997771035	0.0262196098245697
NLRP10	21	Inverse variance weighted	0.0237896215612541	0.0104175852660084	1.02407485195821	1.00337684317174	1.04519982651595	0.0223949151307306	0.0262196098245697
CKMT2	21	Inverse variance weighted	0.0245405976063003	0.0107529101597665	1.02484419648386	1.00347090337628	1.04667272716408	0.0224758556065105	0.0262196098245697
MAN1A2	21	Inverse variance weighted	0.0260357479143286	0.0114082995758434	1.02637763867754	1.00368224360808	1.0495862250091	0.022478949259298	0.0262196098245697
UNC13A	21	Inverse variance weighted	0.0253040771726189	0.0110949163629656	1.02562694285394	1.00356437844339	1.04817453518979	0.0225667312906752	0.0262196098245697
LAP3	21	Inverse variance weighted	0.025140916315832	0.0110295675836481	1.02545961433431	1.00352917678287	1.04786930460936	0.0226426523633902	0.0262196098245697
TXNDC11	21	Inverse variance weighted	0.0272222463552438	0.0119465128478438	1.02759615688764	1.00381433731231	1.05194140230906	0.0226862615025059	0.0262196098245697
TDP1	21	Inverse variance weighted	0.0271417966831446	0.0119125380234722	1.02751349043906	1.00380042552942	1.05178673587175	0.0227014070242649	0.0262196098245697
SMC3	21	Inverse variance weighted	0.0249928616659984	0.0109720892367832	1.02530780150876	1.00349365539898	1.04759614789668	0.0227350370553961	0.0262196098245697
C1QTNF1	21	Inverse variance weighted	0.0253668687525824	0.0111381674469155	1.02569134561209	1.00354231979426	1.04832921911975	0.0227580320057941	0.0262196098245697
LILRB1	21	Inverse variance weighted	-0.0653714	0.0287159895678269	0.936719481510967	0.88545400943034	0.990953090388828	0.0228172025678093	0.0262196098245697
SERPINB13	21	Inverse variance weighted	0.0317367228530292	0.0139417555999914	1.03224570282339	1.00442062413523	1.06084160897704	0.0228233218143549	0.0262196098245697
ALAD	21	Inverse variance weighted	0.0252301493726307	0.0110841219222041	1.02555112331307	1.00351142104988	1.04807487435305	0.0228314996115378	0.0262196098245697
SGTA	21	Inverse variance weighted	0.0250704515343161	0.0110148407016858	1.02538735809242	1.00348743074424	1.04776522547568	0.0228423469827082	0.0262196098245697
NAB2	21	Inverse variance weighted	0.0304794700280585	0.0134022411289428	1.03094872448313	1.0042199564609	1.05838891736342	0.022953546100048	0.0262196098245697
SPIN1	21	Inverse variance weighted	0.0246728412601351	0.0108511626932502	1.02497973458685	1.00341036448654	1.04701276117605	0.0229809661310012	0.0262196098245697
PDYN	21	Inverse variance weighted	0.028851773608329	0.0126943531820784	1.02927201789021	1.00397873560752	1.05520251499225	0.0230380085297733	0.0262196098245697
VEGFB	21	Inverse variance weighted	0.0245716922896838	0.0108136296246583	1.02487606418512	1.00338268664024	1.04682984959277	0.0230690571683339	0.0262196098245697
N6AMT1	21	Inverse variance weighted	0.0246535104803791	0.0108530508269597	1.02495992112085	1.00338725468496	1.04699639645502	0.023112239367713	0.0262196098245697
SCARA3	21	Inverse variance weighted	0.0248053268971458	0.0109199730251962	1.02511553867575	1.00340797375021	1.04729272153072	0.0231133595369162	0.0262196098245697
RNF41	21	Inverse variance weighted	0.0247167647485325	0.0108820152121297	1.02502475626107	1.00339376074248	1.04712206917711	0.0231263573165596	0.0262196098245697
EVA1B	21	Inverse variance weighted	0.0267012132812736	0.0117559869519045	1.02706088476257	1.00366618292359	1.051	0.0231296459910776	0.0262196098245697
SSB	21	Inverse variance weighted	0.0243015699506054	0.0107039377191651	1.02459925965263	1.00332737548582	1.04632213625427	0.0231870072434427	0.0262196098245697
GLRX2	21	Inverse variance weighted	0.0246030769895152	0.0108407954553442	1.02490823011752	1.00336075260503	1.04691844626708	0.0232385440344163	0.0262196098245697
MMGT1	21	Inverse variance weighted	0.02631278524405	0.0115956173780261	1.02666202298856	1.00359181032923	1.05026256551574	0.0232561123344045	0.0262196098245697
DEFB113	21	Inverse variance weighted	0.0244218162091354	0.0107642699690537	1.02472247128781	1.00332937717484	1.04657171119512	0.0232813924701238	0.0262196098245697
PPIE	21	Inverse variance weighted	0.0250220471999997	0.0110321623934142	1.02533772610115	1.00340479209019	1.0477500813767	0.0233231141717607	0.0262196098245697
DYNLT3	21	Inverse variance weighted	0.0278303566867375	0.0122707412470964	1.02822123876736	1.00378685593108	1.05325040829672	0.0233276394147736	0.0262196098245697
IL22	21	Inverse variance weighted	0.0246926440726988	0.0108874825278897	1.02500003226939	1.00335880650947	1.0471080328753	0.0233301376699233	0.0262196098245697
ITCH	21	Inverse variance weighted	0.0243404096759131	0.0107336330317662	1.02463905557925	1.00330794815825	1.04642367893685	0.023348918184175	0.0262196098245697
TAX1BP1	21	Inverse variance weighted	0.0243155021853328	0.0107251793118384	1.02461353470946	1.00329958241128	1.04638027755049	0.0233815656232561	0.0262196098245697
GFRA1	21	Inverse variance weighted	0.0253952253035931	0.0112024425082863	1.02572043109344	1.00344435619644	1.04849102619951	0.0233941078691587	0.0262196098245697
LRP8	21	Inverse variance weighted	0.0282472334302844	0.0124619615937143	1.02864996964678	1.00382910105351	1.05408456374082	0.0234100051088049	0.0262196098245697
LYSMD4	21	Inverse variance weighted	0.0251610335521689	0.0111039879402905	1.02548024395523	1.00340299427166	1.04804324558131	0.0234547090291965	0.0262196098245697
PF4V1	21	Inverse variance weighted	0.0294008641756758	0.0129785489811392	1.02983733663786	1.0039707708762	1.0563703353712	0.0234916435413144	0.0262196098245697
CASQ2	21	Inverse variance weighted	0.0241522754819126	0.0106616999424809	1.02444630406853	1.00326064797991	1.04607933345422	0.0234923975646905	0.0262196098245697
PI15	21	Inverse variance weighted	0.0244427912037389	0.0108007628758478	1.02474396506153	1.00327865905038	1.04666852469879	0.0236318951857511	0.0262196098245697
BTN2A1	21	Inverse variance weighted	0.0284660581454488	0.0125836762794375	1.02887508831326	1.00380928960876	1.05456679701003	0.023688653392374	0.0262196098245697
GAGE2A	21	Inverse variance weighted	0.0240772653629475	0.0106475307101444	1.02436946311135	1.00321325664781	1.04597182104763	0.02374066201908	0.0262196098245697
HAO1	21	Inverse variance weighted	0.0264859051116589	0.0117173607890432	1.02683977396772	1.00352608001026	1.05069508646084	0.0237965276156876	0.0262196098245697
ROCK2	21	Inverse variance weighted	0.025672406771726	0.0113622332089677	1.02600478119489	1.00340822451633	1.04911020790387	0.0238553582487387	0.0262196098245697
ARID3A	21	Inverse variance weighted	0.024704270700387	0.0109371877069761	1.02501194963242	1.00327272650828	1.04722222495359	0.0238995209679964	0.0262196098245697
MB	21	Inverse variance weighted	0.0250198701187402	0.011081645391553	1.02533549386003	1.00330529563391	1.04784942284686	0.0239596444746694	0.0262196098245697
AIF1	21	Inverse variance weighted	0.0245601386010641	0.0108783428452215	1.02486422315461	1.00324383651197	1.04695053951599	0.0239637730424059	0.0262196098245697
NR1H4	21	Inverse variance weighted	0.0243822823362971	0.0108026291689453	1.02468196084071	1.00321428393279	1.04660902230805	0.0240037466922933	0.0262196098245697
SH2D3C	21	Inverse variance weighted	0.0272714141054377	0.0120834916362404	1.0276466827209	1.00359421425091	1.05227560054789	0.0240133835752056	0.0262196098245697
QPCTL	21	Inverse variance weighted	0.0257899522459084	0.0114308602700443	1.02612539050181	1.00339120327953	1.0493746741959	0.0240600510473147	0.0262196098245697
DHH	21	Inverse variance weighted	0.0248078845625351	0.010996792825389	1.02511816058164	1.00325947118608	1.0474530999562	0.0240756434962625	0.0262196098245697
SNTB1	21	Inverse variance weighted	0.0247906396182377	0.0109893635818731	1.02510048262849	1.00325677881549	1.04741978491872	0.0240784090285948	0.0262196098245697
C7orf73	21	Inverse variance weighted	0.031303324256127	0.0138833038631816	1.03179842591572	1.00410043254733	1.06026046520199	0.0241492746902209	0.0262196098245697
NFKBIB	21	Inverse variance weighted	0.0248730735933612	0.0110325427188411	1.02518498921923	1.00325	1.04759478681057	0.0241635571671529	0.0262196098245697
SLIT2	21	Inverse variance weighted	0.0252072633017928	0.0111818031736472	1.02552765274599	1.00329635013369	1.04825156236895	0.0241766018921406	0.0262196098245697
USP21	21	Inverse variance weighted	0.0242162832570043	0.0107531717892403	1.02451187869578	1.0031450017233	1.04633386777146	0.0243214469990524	0.0262196098245697
CD68	21	Inverse variance weighted	0.0247006599682204	0.0109784181619333	1.02500824859548	1.00318803136803	1.04730307463502	0.0244534609614978	0.0262196098245697
WBP1L	21	Inverse variance weighted	0.0266375544187928	0.0118397425470433	1.02699550531596	1.00343755390957	1.05110653256878	0.0244589533994088	0.0262196098245697
BHMT2	21	Inverse variance weighted	0.0243673028041854	0.0108372733163959	1.02466661169934	1.00313113891086	1.0466644134598	0.0245461250577038	0.0262196098245697
STIP1	21	Inverse variance weighted	0.0242192311241702	0.0107725172569047	1.02451489882516	1.00310992310884	1.04637662706167	0.0245607310327283	0.0262196098245697
SEPHS1	21	Inverse variance weighted	0.0232128161065231	0.0103251591632202	1.02348433032197	1.00297993535301	1.04440790637145	0.0245647158190347	0.0262196098245697
RARRES3	21	Inverse variance weighted	0.0242532844983293	0.0107931406220086	1.02454978760837	1.00310353490243	1.04645455904057	0.0246335291518258	0.0262196098245697
HS3ST4	21	Inverse variance weighted	0.0243067624668985	0.0108184374722933	1.02460457991479	1.00310744314387	1.04656241199059	0.0246534196053236	0.0262196098245697
ACADM	21	Inverse variance weighted	0.0240753442260577	0.0107182196286415	1.02436749515928	1.0030723437573	1.04611474104482	0.0246907265845194	0.0262196098245697
HSPA6	21	Inverse variance weighted	0.0242867329177146	0.0108125970728578	1.02458405775249	1.00309883414531	1.0465294701444	0.0246942950130389	0.0262196098245697
ZWILCH	21	Inverse variance weighted	0.0245101183412556	0.0109140792465336	1.02481	1.0031233906696	1.04697150290736	0.0247210539546293	0.0262196098245697
GABARAP	21	Inverse variance weighted	0.0245493093823091	0.010932613764821	1.02485312473584	1.0031262630024	1.0470505718165	0.0247353180478478	0.0262196098245697
HRAS	21	Inverse variance weighted	0.0298848194769697	0.0133122130574703	1.03033585249636	1.00380008396349	1.05757310235294	0.0247734320753134	0.0262196098245697
RGS10	21	Inverse variance weighted	0.0247654228994296	0.0110391982065185	1.02507463328379	1.00313349357399	1.04749568281102	0.0248705320678657	0.0262196098245697
STAU2	21	Inverse variance weighted	0.0238107200892072	0.0106183114507663	1.02409645865803	1.00300333063343	1.04563317449164	0.0249342031446694	0.0262196098245697
ZNF526	21	Inverse variance weighted	0.0240043098977213	0.0107054646880232	1.02429473248664	1.00302616874116	1.04601428327304	0.0249453296926761	0.0262196098245697
SPINK13	21	Inverse variance weighted	0.0291465702389804	0.0130025823837355	1.02957548854198	1.00367	1.05615149029206	0.0249873276858314	0.0262196098245697
CASP3	21	Inverse variance weighted	0.0246767479598309	0.0110085953307539	1.02498373888268	1.00310471077355	1.04733997726295	0.024987937214931	0.0262196098245697
OSBPL9	21	Inverse variance weighted	0.0351701401811447	0.0156910842107275	1.03579592431472	1.00442537832148	1.06814624558759	0.024999582477998	0.0262196098245697
CLEC4M	21	Inverse variance weighted	0.0243752467545848	0.0108776673093335	1.02467475163241	1.0030596901541	1.04675559883344	0.0250356382603772	0.0262196098245697
SIRPB1	21	Inverse variance weighted	0.0207678278283535	0.00927321650836929	1.02098497981787	1.00259568644779	1.03971156379794	0.0251201812929853	0.0262196098245697
MMRN2	21	Inverse variance weighted	0.0244185118570355	0.01091080544495	1.02471908524956	1.00303793839524	1.04686888050782	0.0252202825060079	0.0262196098245697
PLBD2	21	Inverse variance weighted	0.0244424794115528	0.0109230290045097	1.02474364555442	1.00303794780151	1.04691905366672	0.0252405212656796	0.0262196098245697
FBXL4	21	Inverse variance weighted	0.0240787201002189	0.0107615942314816	1.02437095330087	1.00299045793139	1.04620721131359	0.025255784420844	0.0262196098245697
MAN1B1	21	Inverse variance weighted	0.0241773967571718	0.0108065189219257	1.02447203978938	1.00300111402309	1.04640258683307	0.025266908619357	0.0262196098245697
EIF4G3	21	Inverse variance weighted	0.0238874954968813	0.010682928633918	1.02417508709947	1.00295330782064	1.04584590414731	0.0253489073651984	0.0262196098245697
SUGT1	21	Inverse variance weighted	0.0245282623606404	0.0109714875814435	1.0248315548569	1.00302872404567	1.04710831370229	0.0253755661730482	0.0262196098245697
ARHGAP1	21	Inverse variance weighted	0.0281409162259665	0.0125904437299408	1.02854061227118	1.00346965187035	1.0542379524078	0.0254107038691772	0.0262196098245697
PPA2	21	Inverse variance weighted	0.0243594572763309	0.0109050991508631	1.02465857268043	1.00298992387334	1.04679535215359	0.0254983677180225	0.0262196098245697
TPM4	21	Inverse variance weighted	0.0243364643048201	0.0108984258106202	1.02463501300591	1.0029799810582	1.0467575920807	0.0255472533847186	0.0262196098245697
HARS	21	Inverse variance weighted	0.0238997202225393	0.0107038511514297	1.02418760743547	1.00292443982117	1.04590157899774	0.0255611416785642	0.0262196098245697
MAP4K1	21	Inverse variance weighted	0.0267842469438416	0.0119970146963744	1.02714616893019	1.00327545074279	1.05158483800921	0.0255769190079525	0.0262196098245697
PALM	21	Inverse variance weighted	0.0243252120328453	0.0108974498696114	1.02462348359894	1.00297061384302	1.04674381148592	0.025602205529409	0.0262196098245697
ZNF410	21	Inverse variance weighted	0.0264750995607023	0.0118699393980833	1.02682867845817	1.00321517596655	1.05099799142124	0.025718738647096	0.0262196098245697
HECW1	21	Inverse variance weighted	0.0241066968728724	0.0108121951201415	1.02439961229504	1.00291904658107	1.04634024974157	0.02577507531782	0.0262196098245697
TARBP2	21	Inverse variance weighted	0.024335964215791	0.0109165905977508	1.02463450059731	1.00294377105357	1.04679433694616	0.0257963335188016	0.0262196098245697
CHMP2B	21	Inverse variance weighted	0.0243075898585064	0.0109094730339201	1.02460542766437	1.00292930476497	1.04675003254123	0.0258726679176331	0.0262196098245697
SNX3	21	Inverse variance weighted	0.0242873576994532	0.0109081887062381	1.0245846978941	1.00291153815327	1.04672621983367	0.0259790189187246	0.0262196098245697
OCRL	21	Inverse variance weighted	0.0240901673792432	0.0108201279524626	1.02438267962812	1.00288687561536	1.04633922313342	0.0259859501052522	0.0262196098245697
IFNA14	21	Inverse variance weighted	0.0251772935506458	0.0113091566636068	1.0255	1.0030158851485	1.04848182886763	0.0259957622363697	0.0262196098245697
NUTF2	21	Inverse variance weighted	0.0242859378855931	0.0109153145446229	1.02458324317558	1.00289610701663	1.04673935301134	0.0260851559324694	0.0262196098245697
GPC1	21	Inverse variance weighted	0.024966455281632	0.0112235966753087	1.02528072719433	1.00297261528253	1.04808501602013	0.0261174304982159	0.0262196098245697
TSSC4	21	Inverse variance weighted	0.0268549865707774	0.0120749105637273	1.02721883143702	1.00319324945917	1.05181980463654	0.0261462964587781	0.0262196098245697
HINT2	21	Inverse variance weighted	0.0238077634544868	0.0107083798853461	1.02409343078336	1.0028233169527	1.04581468863384	0.0261966947998526	0.0262196098245697
VASP	21	Inverse variance weighted	0.0242888717272331	0.0109264458101848	1.02458624914497	1.00287716906812	1.04676526130554	0.0262196098245697	0.0262196098245697
CSTL1	21	Inverse variance weighted	0.0244988271502414	0.0110229871876798	1.02480138916843	1.00289796326297	1.04718318883072	0.0262480757682031	0.0417516331992839
GPCPD1	21	Inverse variance weighted	0.0245278223060833	0.0110383582936704	1.02483110387521	1.0028968277706	1.04724510277373	0.0262796925429892	0.0417516331992839
FARS2	21	Inverse variance weighted	0.0255230348200201	0.0114866278924663	1.02585153630379	1.00301377647111	1.04920929225857	0.0262847903592943	0.0417516331992839
IMPDH1	21	Inverse variance weighted	0.0242042464000186	0.0108989163223772	1.02449954686703	1.00284641377293	1.0466202073575	0.0263649269563665	0.0417516331992839
SH3BP2	21	Inverse variance weighted	0.024118227403575	0.010863315708822	1.02441142423432	1.00283012588047	1.04645716060874	0.0264083557531075	0.0417516331992839
GBP2	21	Inverse variance weighted	0.0263716223384997	0.0118790976343166	1.02672243057606	1.00309336558669	1.05090810647666	0.0264186213823937	0.0417516331992839
MAPK10	21	Inverse variance weighted	0.0245526177223358	0.0110597648306872	1.02485651530406	1.00287961680837	1.04731501105169	0.0264191371173121	0.0417516331992839
HNRNPAB	21	Inverse variance weighted	0.0241358017347561	0.0108810358417632	1.02442942773815	1.00281292034184	1.04651189781058	0.0265444056310878	0.0417516331992839
SPINK6	21	Inverse variance weighted	0.0267445218088233	0.01206036663083	1.0271053662204	1.00311103246051	1.05167364247913	0.0265852145837023	0.0417516331992839
CD164L2	21	Inverse variance weighted	0.0241218420581736	0.0108784964673156	1.02441512713447	1.00280391261257	1.04649208035887	0.0265966233314289	0.0417516331992839
C3	21	Inverse variance weighted	0.0247800838585736	0.0111768870308959	1.02508966197127	1.00287751740628	1.04779377026824	0.0266174347536096	0.0417516331992839
ST6GAL1	21	Inverse variance weighted	0.0291711797250869	0.0131620748404078	1.02960082617743	1.00337920973716	1.05650770015749	0.0266705821164218	0.0417516331992839
VLDLR	21	Inverse variance weighted	0.0242082331612336	0.0109272551336818	1.02450363131023	1.0027947110434	1.04668251538318	0.0267326706814964	0.0417516331992839
GALE	21	Inverse variance weighted	0.0244236091765375	0.0110252815104292	1.02472430858345	1.00281802059233	1.0471091335012	0.0267438161913181	0.0417516331992839
HNRNPC	21	Inverse variance weighted	0.0256557722349863	0.0115818961289906	1.02598771422261	1.00295962689547	1.04954452951819	0.0267489705512759	0.0417516331992839
ARMC5	21	Inverse variance weighted	0.0241488891529588	0.0109026216668192	1.02444283496222	1.00278361777528	1.04656987160775	0.0267626951735001	0.0417516331992839
HMOX1	21	Inverse variance weighted	-0.0248854	0.0112351570562947	0.975421724746441	0.954176827314243	0.997139643168024	0.0267631778234182	0.0417516331992839
FGL2	21	Inverse variance weighted	0.0246512793223675	0.0111330856483915	1.02495763427586	1.00283444090456	1.04756887997662	0.0268125468300453	0.0417516331992839
TCEAL3	21	Inverse variance weighted	0.0267573935106014	0.012092925642689	1.02711858689946	1.00305993131238	1.05175429565213	0.0269218900840132	0.0417516331992839
FLT3LG	21	Inverse variance weighted	0.0236584750078247	0.0106948883674765	1.02394055687728	1.00270013261694	1.04563092186076	0.0269577380208713	0.0417516331992839
COMT	21	Inverse variance weighted	0.0247592932641301	0.0111933327154404	1.02506834996939	1.00282434210205	1.0478057601857	0.0269688792575666	0.0417516331992839
DNAJB11	21	Inverse variance weighted	0.0246042023759888	0.0111246126971519	1.02490938353603	1.00280388504282	1.04750216879679	0.026988043952922	0.0417516331992839
BOLA2	21	Inverse variance weighted	0.0238158609615478	0.0107691867389965	1.02410172342072	1.00271192558848	1.04594780729049	0.0270024877015079	0.0417516331992839
NXPH2	21	Inverse variance weighted	-0.0500363	0.0226281598001208	0.951194916103973	0.909930121894715	0.99433104438621	0.027019263816546	0.0417516331992839
CDKN2C	21	Inverse variance weighted	0.0240883320381229	0.0108966298606959	1.02438079953819	1.00273466991789	1.04649420623745	0.0270620090864341	0.0417516331992839
OLFM1	21	Inverse variance weighted	0.0238673105365808	0.0107977797568887	1.02415441437464	1.00270732040385	1.04606024424016	0.0270780677934559	0.0417516331992839
IDH3G	21	Inverse variance weighted	0.0232086309974159	0.0105088793116299	1.02348004693734	1.00261463977066	1.04477968396559	0.0272109549616614	0.0417516331992839
DOK1	21	Inverse variance weighted	0.0244386115971527	0.0110679676714322	1.02473968204386	1.00274916700902	1.04721245402531	0.0272408787080383	0.0417516331992839
NAA10	21	Inverse variance weighted	0.0242764175658005	0.0109946318359765	1.02457348886188	1.00273066064788	1.04689212694498	0.0272425583399702	0.0417516331992839
YWHAB	21	Inverse variance weighted	0.0240818589763486	0.0109079454898164	1.02437416867945	1.00270594028169	1.04651064215589	0.0272627135155709	0.0417516331992839
UBE2F	21	Inverse variance weighted	0.0244124417444782	0.0110607077646855	1.02471286510825	1.0027371938188	1.0471701482613	0.0273048406692725	0.0417516331992839
PAFAH1B2	21	Inverse variance weighted	0.0239673493346136	0.0108635667006653	1.02425687467617	1.00267833895958	1.04629979980417	0.0273690427469421	0.0417516331992839
HNRNPM	21	Inverse variance weighted	0.0235455160429701	0.0106795533660672	1.02382490014426	1.00261700985306	1.04548139105383	0.0274731495439535	0.0417516331992839
RDX	21	Inverse variance weighted	0.0229946312758133	0.010431460526686	1.02326104592614	1.00255222002605	1.04439763554926	0.0274994611480878	0.0417516331992839
FAM210A	21	Inverse variance weighted	0.0266277019375866	0.0120846349659371	1.02698538691189	1.00294614879552	1.05160081246357	0.027564136858107	0.0417516331992839
DNAJC4	21	Inverse variance weighted	0.028267605929093	0.0128337076467338	1.02867092603053	1.00311839103829	1.05487436329948	0.0276225061237492	0.0417516331992839
FUT10	21	Inverse variance weighted	0.0207846181730573	0.0094369657885318	1.02100212265154	1.00229078507542	1.04006277417835	0.0276322446403587	0.0417516331992839
LDHC	21	Inverse variance weighted	0.029115226627204	0.0132211108744457	1.0295432184333	1.00320698070799	1.05657083633325	0.0276528062153991	0.0417516331992839
NR1D2	21	Inverse variance weighted	0.0235146571540487	0.0106835583030933	1.02379330653287	1.00258	1.04545733562724	0.0277350608507806	0.0417516331992839
C1QL1	21	Inverse variance weighted	0.0268908446168949	0.0122180785715006	1.02725566615766	1.00294774670303	1.05215272392996	0.0277426664562136	0.0417516331992839
PDZK1	21	Inverse variance weighted	0.0237784134691514	0.0108072354779196	1.02406337409727	1.00259960506106	1.04598664199914	0.027790516842834	0.0417516331992839
UNC5C	21	Inverse variance weighted	0.0243181551718662	0.0110558789510743	1.02461625299897	1.00265214315349	1.04706150889755	0.0278375749366201	0.0417516331992839
FABP12	21	Inverse variance weighted	0.0272433190689287	0.0123893240191965	1.0276178113554	1.00296462984021	1.05287697571459	0.0278825395662415	0.0417516331992839
UQCRB	21	Inverse variance weighted	0.026012289228546	0.0118355016847591	1.02635356148943	1.00281867093038	1.05044078627368	0.0279620144312455	0.0417516331992839
PLG	21	Inverse variance weighted	0.0247784590120916	0.011276850499586	1.0250879963593	1.00267941526677	1.04799738010014	0.0280000693814893	0.0417516331992839
TNFRSF6B	21	Inverse variance weighted	0.0274310680559932	0.0124864169498829	1.02781076367131	1.00296206911723	1.05327509229576	0.0280295417204678	0.0417516331992839
KCNN1	21	Inverse variance weighted	0.0236569733241524	0.0107697870776701	1.02393901924362	1.00255144004916	1.04578286285059	0.0280486344460301	0.0417516331992839
CENPW	21	Inverse variance weighted	0.0259082874484645	0.0117974643875885	1.02624682444256	1.00278913968145	1.05025324168647	0.0280855393199527	0.0417516331992839
GHRH	21	Inverse variance weighted	0.0290348104323388	0.0132299654487191	1.02946042981404	1.0031089007921	1.05650420977828	0.0281905222191711	0.0417516331992839
GALNT16	21	Inverse variance weighted	0.0240992094115925	0.0109825900341119	1.02439194217132	1.0025766468079	1.04668192155347	0.0282131161606678	0.0417516331992839
UBE2D1	21	Inverse variance weighted	0.0238763146230613	0.010885080322394	1.02416363599107	1.00254478968559	1.0462486704613	0.0282720957023078	0.0417516331992839
EYS	21	Inverse variance weighted	0.02829636136453	0.0129001739012171	1.02870050633623	1.00301656120969	1.05504213256473	0.0282723235151221	0.0417516331992839
SULT1E1	21	Inverse variance weighted	0.023368553913595	0.0106672859778184	1.02364373793972	1.00246370333858	1.04527126392056	0.0284753384471472	0.0417516331992839
EDAR	21	Inverse variance weighted	0.0242038367551874	0.0110500275296858	1.02449912718617	1.00254902605365	1.04692981024257	0.0284961813404095	0.0417516331992839
HSP90B1	21	Inverse variance weighted	0.0224470595705013	0.0102488121391184	1.02270089050687	1.00236217332347	1.04345	0.0285089485530488	0.0417516331992839
RGS3	21	Inverse variance weighted	0.024879288597859	0.0113594990294781	1.02519136076835	1.00261809173214	1.04827285170798	0.0285115615693224	0.0417516331992839
C1RL	21	Inverse variance weighted	0.0326179904645201	0.0148929918075683	1.03315578848399	1.00343360789423	1.06375835419546	0.0285128515478543	0.0417516331992839
SULT1A3	21	Inverse variance weighted	0.0277227090507739	0.0126607481688446	1.02811055913907	1.00291187393273	1.05394237448638	0.0285490461523576	0.0417516331992839
EXTL2	21	Inverse variance weighted	0.0266875692062167	0.0121902493109221	1.02704687156237	1.00279858931691	1.05188149207966	0.0285782815980778	0.0417516331992839
DEFB128	21	Inverse variance weighted	0.0253419474885583	0.011576047532554	1.02566578440577	1.00265641636274	1.04920318080338	0.0285844140060989	0.0417516331992839
RAET1L	21	Inverse variance weighted	0.0231894374818702	0.0105986300048082	1.02346040294567	1.00242	1.04494343241498	0.02867211075816	0.0417516331992839
IMPDH2	21	Inverse variance weighted	0.0239606695716981	0.0109531276239693	1.02425003290593	1.00249564838765	1.04647649253649	0.0287013639492377	0.0417516331992839
DARS	21	Inverse variance weighted	0.0241827754152818	0.0110547005457432	1.02447755008904	1.00251872902735	1.04691734951897	0.0287019670552613	0.0417516331992839
FAXDC2	21	Inverse variance weighted	0.0243960483951291	0.0111571858928793	1.02469606676996	1.00253116204043	1.04735101412387	0.0287734025946799	0.0417516331992839
UBE2I	21	Inverse variance weighted	0.023746445424324	0.0108602177426989	1.02403063731669	1.00246344796255	1.0460618272861	0.0287751464488889	0.0417516331992839
NDRG1	21	Inverse variance weighted	0.024972204152159	0.0114226317141479	1.02528662141743	1.00258718699941	1.04849999051323	0.0288006773059678	0.0417516331992839
RAP2A	21	Inverse variance weighted	0.0231918939688661	0.0106134298827293	1.02346291706593	1.00239242869991	1.04497631129124	0.0288781425956777	0.0417516331992839
HOMER2	21	Inverse variance weighted	0.0245950372361395	0.0112571481302847	1.02489999014124	1.00253423265341	1.04776471024971	0.028900777376858	0.0417516331992839
NME2	21	Inverse variance weighted	0.0237368153041775	0.0108645912941133	1.0240207758261	1.00244520100733	1.04606072059577	0.0289044846507624	0.0417516331992839
TNFAIP8	21	Inverse variance weighted	0.0236493307288166	0.0108387282310598	1.02393119372195	1.00240831874785	1.04591618990803	0.0291148053168557	0.0417516331992839
JPH3	21	Inverse variance weighted	0.0268383769727098	0.0123003677832204	1.0272017698868	1.00273338502096	1.05226722458883	0.0291156865520856	0.0417516331992839
APOB	21	Inverse variance weighted	0.0248307127812347	0.0113804769164263	1.02514156247031	1.00252816846675	1.0482650325041	0.0291191829190749	0.0417516331992839
ARF6	21	Inverse variance weighted	0.0237358748096428	0.0108817951988702	1.02401981274061	1.00241045671056	1.04609501014822	0.029165208742518	0.0417516331992839
BRAF	21	Inverse variance weighted	0.0243605166920841	0.0111698828138404	1.02465965822044	1.00247059327512	1.04733986435877	0.0291900238280213	0.0417516331992839
DAP	21	Inverse variance weighted	0.0215770121142352	0.00989411506088704	1.02181147916971	1.00218693445529	1.04182030623905	0.0291987661005561	0.0417516331992839
A2ML1	21	Inverse variance weighted	0.0236503673898418	0.010854667444621	1.02393225519206	1.0023780422662	1.0459499500332	0.0293450366544745	0.0417516331992839
CRAT	21	Inverse variance weighted	0.0234062379533266	0.0107440069711697	1.02368231369785	1.00235074296363	1.04546785317823	0.0293659337113634	0.0417516331992839
MTPAP	21	Inverse variance weighted	0.0256728755671499	0.0117880023458627	1.02600526218135	1.00257169211095	1.04998655588146	0.0294148390891975	0.0417516331992839
MAMDC2	21	Inverse variance weighted	0.0244524871860789	0.0112296419925276	1.02475390100909	1.00244537394218	1.04755888443446	0.0294436684328257	0.0417516331992839
OSTF1	21	Inverse variance weighted	0.0280499471285047	0.0128845787562411	1.02844705111563	1.00280008570357	1.05474994670182	0.0294792982613033	0.0417516331992839
BAD	21	Inverse variance weighted	0.023915226202546	0.0109879829669713	1.02420348859116	1.0023816111282	1.04650042897498	0.0295187007460106	0.0417516331992839
GRP	21	Inverse variance weighted	0.0234353173271185	0.0107696669637217	1.02371208217132	1.00232947910841	1.04555083834882	0.0295516363752838	0.0417516331992839
IL2RG	21	Inverse variance weighted	0.024070261598035	0.0110641202757687	1.02436228869357	1.00238743124362	1.04681889037224	0.0295908553915921	0.0417516331992839
PLCB1	21	Inverse variance weighted	0.0240666372014629	0.0110714330140422	1.02435857600513	1.00236943116968	1.04683010036609	0.0297231709713367	0.0417516331992839
S100A2	21	Inverse variance weighted	0.0263893123047496	0.0121403714361835	1.02674059342185	1.0025975520975	1.05146501103539	0.0297289917068158	0.0417516331992839
PTPN1	21	Inverse variance weighted	0.02364800531809	0.0108819250046928	1.02392983659346	1.00232212427288	1.04600336047344	0.029769375302595	0.0417516331992839
SNX1	21	Inverse variance weighted	0.0233382085061938	0.010740103363504	1.02361267552476	1.0022902244805	1.04538873462329	0.0297805702838367	0.0417516331992839
PAWR	21	Inverse variance weighted	0.0240140394734667	0.011054205054829	1.02430469848831	1.00235055580088	1.04673969528247	0.0298262930474614	0.0417516331992839
HINT1	21	Inverse variance weighted	0.0233278458251419	0.010744113110329	1.02360206820805	1.00227196113009	1.04538611741508	0.0299144579163945	0.0417516331992839
KIAA1324L	21	Inverse variance weighted	0.0236278294815129	0.0108844719772045	1.02390917816082	1.00229689824463	1.0459874783191	0.0299475604872167	0.0417516331992839
UAP1	21	Inverse variance weighted	0.0231369228479672	0.0106635263562971	1.02340665770851	1.00223891382242	1.0450214740192	0.0300276627762312	0.0417516331992839
GGA1	21	Inverse variance weighted	0.0239644594146209	0.0110460941472835	1.02425391466003	1.00231679451639	1.04667115969315	0.030045031604145	0.0417516331992839
LRP1B	21	Inverse variance weighted	0.0277207964322251	0.0127801740388102	1.02810859275762	1.00267522736761	1.05418708835272	0.0300791260904354	0.0417516331992839
SCARF1	21	Inverse variance weighted	0.0257563760644987	0.0118788059504298	1.02609093770795	1.0024769790579	1.05026113760321	0.0301386777870342	0.0417516331992839
CYB5R2	21	Inverse variance weighted	0.0266789549227232	0.0123087598704612	1.02703802432756	1.00255704926467	1.05211678895313	0.0301984953716463	0.0417516331992839
PPP1CC	21	Inverse variance weighted	0.0243500130909675	0.0112358386495106	1.02464889566063	1.00233048069637	1.04746426413086	0.0302216182553825	0.0417516331992839
MEGF10	21	Inverse variance weighted	0.0230810085884663	0.0106503981831677	1.02334943628284	1.00220866366155	1.04493615622351	0.0302234315843596	0.0417516331992839
NRGN	21	Inverse variance weighted	0.0244081064134378	0.0112753012145106	1.02470842264839	1.00231118270776	1.04760614224605	0.0304075281672505	0.0417516331992839
B3GALTL	21	Inverse variance weighted	0.0232431015496424	0.0107383638949527	1.02351532746782	1.00219832108795	1.04528575185033	0.0304266184386741	0.0417516331992839
GPR101	21	Inverse variance weighted	0.0270446874594074	0.0124958094283906	1.0274137142463	1.00255616240624	1.05288758854952	0.0304412890768302	0.0417516331992839
BAGE2	21	Inverse variance weighted	0.023336208586908	0.0107851452729041	1.02361062838408	1.00219973973724	1.04547893697873	0.0304846057908501	0.0417516331992839
C1S	21	Inverse variance weighted	0.0246311143880848	0.0113856385488122	1.02493696628091	1.00231794512307	1.04806642439203	0.0305143158075419	0.0417516331992839
RUVBL1	21	Inverse variance weighted	0.0234212639074906	0.0108266298734197	1.02369769561694	1.00220349348698	1.04565288269478	0.0305180030389166	0.0417516331992839
EHMT2	21	Inverse variance weighted	-0.0547236	0.0253012328526267	0.946746778577071	0.90094232898409	0.99487995392199	0.030550154068703	0.0417516331992839
KIR3DL3	21	Inverse variance weighted	0.0273860003275225	0.0126639669153799	1.02776444361867	1.00256791663771	1.05359420946691	0.0305786121233718	0.0417516331992839
CSNK1D	21	Inverse variance weighted	0.0232462217645813	0.01074986536383	1.02351852106062	1.00217885591567	1.04531257746098	0.0305822506392882	0.0417516331992839
ADAM19	21	Inverse variance weighted	0.026010131429964	0.012032470860451	1.02635134682756	1.00242943484938	1.05084412978457	0.0306442617509101	0.0417516331992839
TLN2	21	Inverse variance weighted	0.0245698088134693	0.0113708900268525	1.02487413385725	1.00228547207966	1.04797187977815	0.0307135810990366	0.0417516331992839
EHF	21	Inverse variance weighted	0.0265387849468883	0.0122838190709396	1.02689407452147	1.00246553401017	1.05191790092666	0.0307365405657871	0.0417516331992839
HMHA1	21	Inverse variance weighted	0.0237913556644938	0.0110145826374085	1.02407662781127	1.00220520158352	1.0464253607667	0.0307736734492024	0.0417516331992839
NISCH	21	Inverse variance weighted	0.0234505861891831	0.0108572874127374	1.02372771320923	1.00217265967216	1.04574637980589	0.0307809031039115	0.0417516331992839
RCAN1	21	Inverse variance weighted	0.0237649245661022	0.0110045281706406	1.02404956069887	1.00219846243412	1.04637708206071	0.0308068484139615	0.0417516331992839
KAZALD1	21	Inverse variance weighted	0.0567346541313501	0.0262751266076152	1.05837493771574	1.00524913466627	1.11430835417398	0.0308305201490776	0.0417516331992839
IFI16	21	Inverse variance weighted	0.0234582286733885	0.0108659823416182	1.02373553706201	1.00216323971795	1.04577219389786	0.0308603583338964	0.0417516331992839
MSH2	21	Inverse variance weighted	0.0265781953613016	0.0123127197757404	1.02693454563999	1.00244825669866	1.05201894859081	0.0308814747718803	0.0417516331992839
CEACAM3	21	Inverse variance weighted	0.0243449750366493	0.0112783710722787	1.02464373343684	1.00224187699161	1.04754631050023	0.0308847706724292	0.0417516331992839
CD47	21	Inverse variance weighted	0.0236389750240405	0.0109599053434158	1.0239205902477	1.00215988975955	1.04615379825744	0.0310166200387893	0.0417516331992839
PGLYRP3	21	Inverse variance weighted	0.0234353700487186	0.0108713708313434	1.02371213614306	1.00212974791746	1.04576	0.0311074148022917	0.0417516331992839
SKIL	21	Inverse variance weighted	0.0237390258274692	0.0110130679710659	1.02402303945038	1.00215573286229	1.0463674965269	0.0311201889930766	0.0417516331992839
PPM1D	21	Inverse variance weighted	0.0231206097399207	0.0107274233428736	1.0233899629013	1.00209705574007	1.04513530916789	0.0311398660501158	0.0417516331992839
RBBP6	21	Inverse variance weighted	0.0241713637627678	0.0112151367164113	1.02446585917394	1.00219209493325	1.04723465882347	0.0311426921060788	0.0417516331992839
DUSP26	21	Inverse variance weighted	0.0234184812485024	0.0108696273225518	1.02369484701931	1.00211624779446	1.04573809886857	0.0312019247911913	0.0417516331992839
ARL5A	21	Inverse variance weighted	0.0232273990507942	0.0107813019922029	1.02349925584575	1.0020982453885	1.04535731056058	0.0312076389636236	0.0417516331992839
FAM209B	21	Inverse variance weighted	0.0283339485257011	0.0131518585019206	1.02873917299463	1.00255957599766	1.0556023915093	0.0312112916715937	0.0417516331992839
DYRK3	21	Inverse variance weighted	0.0232941895266907	0.0108161465697821	1.02356761813108	1.00209673733584	1.04549853307766	0.0312676628985154	0.0417516331992839
NMRAL1	21	Inverse variance weighted	0.0242889696503569	0.0112860108506064	1.02458634947566	1.00217074103744	1.04750332906859	0.0313870672652939	0.0417516331992839
ICOSLG	21	Inverse variance weighted	0.0232541801562411	0.0108069539423931	1.02352666665429	1.00207469964632	1.04543786777791	0.0314147382651198	0.0417516331992839
MAPRE3	21	Inverse variance weighted	0.0234296378789353	0.0108928815646816	1.0237062680681	1.00208175385918	1.04579743044518	0.0314830867169107	0.0417516331992839
LGALS2	21	Inverse variance weighted	0.0304656476240271	0.0141694894875047	1.03093447439181	1.00269707881907	1.05996707574063	0.0315482640612722	0.0417516331992839
TOR1AIP2	21	Inverse variance weighted	0.0226800509992707	0.0105539220597097	1.02293919880937	1.0019963538284	1.04431977268449	0.0316368599264272	0.0417516331992839
COLEC10	21	Inverse variance weighted	0.0233976568868284	0.0108909005914642	1.02367352944954	1.00205359747644	1.04575992495282	0.0316845724166906	0.0417516331992839
C17orf78	21	Inverse variance weighted	0.0230906166094073	0.0107483244579541	1.02335926869289	1.00202595014119	1.04514677755809	0.0316899960758132	0.0417516331992839
ARL15	21	Inverse variance weighted	0.0244566369508773	0.0113858289073203	1.02475815350558	1.00214270461013	1.04788396736841	0.0317146174442058	0.0417516331992839
GALNT3	21	Inverse variance weighted	0.0283208725183364	0.0131883109638653	1.02872572128158	1.00247484040337	1.05566400968276	0.0317596801730013	0.0417516331992839
AHSG	21	Inverse variance weighted	0.0319832020992262	0.0148992544410486	1.03250016132419	1.00278453302511	1.0630963562217	0.0318226665055513	0.0417516331992839
GIP	21	Inverse variance weighted	0.0249539560816186	0.0116249375697257	1.02526791208554	1.00217143259741	1.04889668310324	0.0318260646051198	0.0417516331992839
CLEC6A	21	Inverse variance weighted	0.0234270596109093	0.010917323227925	1.02370362868237	1.00203116611303	1.04584483478954	0.0318840593783599	0.0417516331992839
MAPKAPK3	21	Inverse variance weighted	0.0237495320734945	0.0110683893197088	1.02403379814489	1.00205760297256	1.04649195478611	0.0318962784653818	0.0417516331992839
MAP2K1	21	Inverse variance weighted	0.0245038580869577	0.0114208523603785	1.02480654489234	1.00212123410113	1.0480053896834	0.0319099589565115	0.0417516331992839
PTGES2	21	Inverse variance weighted	0.0247588460127494	0.0115413306331176	1.02506789150626	1.00214012477675	1.0485202180994	0.0319342038432078	0.0417516331992839
HTRA2	21	Inverse variance weighted	0.0233313394716468	0.0108759565965707	1.02360564431808	1.00201649493922	1.04565994708838	0.0319351153182234	0.0417516331992839
C22orf15	21	Inverse variance weighted	0.0261890152931604	0.0122123560068327	1.02653496094378	1.0022553369747	1.05140275852326	0.0319953502151546	0.0417516331992839
CNN2	21	Inverse variance weighted	0.023128912370944	0.010787132702775	1.02339845976583	1.00198810594065	1.04526630729598	0.0320232328422961	0.0417516331992839
VEGFA	21	Inverse variance weighted	0.0247976134832732	0.0115681932609997	1.02510763156583	1.00212621188125	1.04861607633413	0.0320647122544895	0.0417516331992839
WARS	21	Inverse variance weighted	0.0236521950757286	0.0110342526558179	1.02393412662031	1.00202711168885	1.04632008797707	0.0320709756507839	0.0417516331992839
KRT17	21	Inverse variance weighted	0.0244956542889111	0.0114293119725068	1.02479813762089	1.00209639719708	1.04801416890505	0.0320945643264991	0.0417516331992839
ECH1	21	Inverse variance weighted	0.0229767155592417	0.0107239765514162	1.02324271363549	1.0019596391064	1.04497787150578	0.0321488030201928	0.0417516331992839
NMT1	21	Inverse variance weighted	0.0235893587389498	0.0110120279605377	1.0238697883721	1.0020077968665	1.04620876885331	0.0321818295778294	0.0417516331992839
DEFB125	21	Inverse variance weighted	0.0236220061197208	0.0110276981407057	1.02390321558459	1.00200973457875	1.04627505971806	0.032188544417412	0.0417516331992839
VRK1	21	Inverse variance weighted	0.0265692850894726	0.0124075343365431	1.0269253954148	1.00225305210583	1.05220509484315	0.0322431517983749	0.0417516331992839
C7orf69	21	Inverse variance weighted	0.0274312269254443	0.0128113154475562	1.02781092695905	1.00232374436688	1.05394620003111	0.0322601889764616	0.0417516331992839
GSTT1	21	Inverse variance weighted	0.0287675782111136	0.0134369402298425	1.02918536157191	1.00243413306385	1.05665048060213	0.0322795047838868	0.0417516331992839
PAF	21	Inverse variance weighted	-0.0273039	0.0127570391433409	0.973065453044804	0.949036778172281	0.997702510257621	0.0323302839522324	0.0417516331992839
SARS2	21	Inverse variance weighted	0.0227520460687183	0.0106313925264781	1.02301284803919	1.00191635057408	1.0445535564457	0.0323481839003894	0.0417516331992839
C3	21	Inverse variance weighted	0.0238164125576538	0.0111295851735628	1.0241022883114	1.00200443181051	1.04668748323759	0.0323613003890198	0.0417516331992839
RAB1B	21	Inverse variance weighted	0.0232397254623836	0.0108614651111424	1.02351187199659	1.00195315877913	1.04553445731379	0.0323831248964079	0.0417516331992839
KIRREL2	21	Inverse variance weighted	0.0242209024830945	0.011321019684415	1.02451661115871	1.00203376921047	1.04750390534957	0.0323981912157471	0.0417516331992839
VARS	21	Inverse variance weighted	0.0233306868129857	0.0109071435505452	1.02360497625321	1.00195459318569	1.04572318400077	0.0324333906854895	0.0417516331992839
C1QBP	21	Inverse variance weighted	0.0236054936158461	0.0110373865388143	1.02388630851836	1.00197416209691	1.04627765108974	0.0324611839473012	0.0417516331992839
SUV420H2	21	Inverse variance weighted	0.0231575737043495	0.0108369955187166	1.02342779215064	1.00191890122676	1.04539842941768	0.0326061411745463	0.0417516331992839
PRSS27	21	Inverse variance weighted	0.0238326274149029	0.011152991209193	1.02411889411845	1.00197471182529	1.04675247480025	0.0326075812429888	0.0417516331992839
TNKS	21	Inverse variance weighted	0.0289241360039862	0.0135407908144237	1.02934650117407	1.00238703043928	1.05703105417772	0.0326733536902696	0.0417516331992839
NUDT5	21	Inverse variance weighted	0.0252833980240715	0.0118404925909514	1.02560573398133	1.0020781889934	1.04968567635625	0.0327337953586867	0.0417516331992839
CCL11	21	Inverse variance weighted	-0.0231692	0.0108561069871763	0.977097177906221	0.956526164589518	0.998110590609935	0.0328259398543371	0.0417516331992839
AK2	21	Inverse variance weighted	0.0231769906003103	0.0108612780143929	1.02344766413453	1.00189067076043	1.04546848452778	0.0328501424686876	0.0417516331992839
JAM2	21	Inverse variance weighted	0.0235506158954778	0.0110377186720152	1.02383012151356	1.00191852531754	1.04622091640261	0.0328715349527998	0.0417516331992839
PLA2G2E	21	Inverse variance weighted	0.0228491176521031	0.0107094525255818	1.0231121583362	1.0018603189522	1.04481479976182	0.0328799007331583	0.0417516331992839
RHOG	21	Inverse variance weighted	0.0247874587362805	0.0116212253900646	1.02509722191005	1.0020118780881	1.04871442878774	0.0329290678019467	0.0417516331992839
MOCS3	21	Inverse variance weighted	0.0232235277508852	0.0108880747076014	1.02349529358084	1.00188467509579	1.04557205237417	0.0329302687527286	0.0417516331992839
PFDN2	21	Inverse variance weighted	0.0229408284371515	0.0107562809605715	1.02320599305819	1.00186024586896	1.04500653514017	0.0329424149991079	0.0417516331992839
LTB4R	21	Inverse variance weighted	0.0230242045568765	0.010795800039903	1.02329130756012	1.00186617562103	1.04517462073118	0.0329493301460133	0.0417516331992839
PLS1	21	Inverse variance weighted	0.0228815066562364	0.0107308091065015	1.02314529645678	1.00185083148563	1.04489237794942	0.0329806425237916	0.0417516331992839
COL8A1	21	Inverse variance weighted	0.0349161856415592	0.0163759338058751	1.03553291263557	1.00282333350213	1.06930939610934	0.0329933210739626	0.0417516331992839
GALNT11	21	Inverse variance weighted	0.0227461373323896	0.0106692867775609	1.02300680334387	1.00183601867043	1.04462496874163	0.0330128730147443	0.0417516331992839
PPP3R1	21	Inverse variance weighted	0.0247983122089028	0.0116320873372042	1.02510834783506	1.00200142120305	1.04874813804099	0.0330160210172276	0.0417516331992839
ENOX1	21	Inverse variance weighted	0.0233489624092299	0.0109586960340552	1.02362368341541	1.00187166756972	1.04584796552899	0.0331193661137601	0.0417516331992839
ARHGAP5	21	Inverse variance weighted	0.0236043944951402	0.0110791236440403	1.02388518314434	1.00189109802754	1.04636209496863	0.0331279621606778	0.0417516331992839
NTS	21	Inverse variance weighted	0.0235872763084294	0.0110730632320227	1.02386765623662	1.0018858483532	1.0463317544714	0.0331593010663613	0.0417516331992839
TDGF1	21	Inverse variance weighted	0.0179404196595097	0.00842277657149294	1.0181023157001	1.00143280306226	1.03504930342236	0.0331725390461309	0.0417516331992839
FOXJ2	21	Inverse variance weighted	0.0230014883481648	0.0108025243329709	1.02326806252523	1.00183021345545	1.04516465337237	0.0332319485507861	0.0417516331992839
SUFU	21	Inverse variance weighted	0.0239889672337065	0.0112670148901733	1.02427901719727	1.00190743489293	1.04715013436617	0.0332433021000315	0.0417516331992839
VHL	21	Inverse variance weighted	0.0227844374285223	0.0107015181496415	1.02304598535311	1.00181109991918	1.04473097596099	0.0332472621142211	0.0417516331992839
C5orf38	21	Inverse variance weighted	0.0247080900626624	0.0116091218031852	1.02501586453187	1.00195612204382	1.04860632060299	0.0333093909038281	0.0417516331992839
FAM49B	21	Inverse variance weighted	0.0258175133532041	0.0121310319106408	1.02615367204353	1.00204277443494	1.05084471991948	0.0333187884635702	0.0417516331992839
MRAS	21	Inverse variance weighted	0.0238874222968829	0.0112252792095008	1.02417501212986	1.00188765442699	1.0469581602651	0.0333368757418546	0.0417516331992839
IGSF9B	21	Inverse variance weighted	0.0241363171067133	0.0113428140304788	1.02442995570049	1.00190621613139	1.04746004889431	0.0333457913749496	0.0417516331992839
KLHL13	21	Inverse variance weighted	0.0229971167751782	0.0108111267564408	1.02326358924398	1.00180894249859	1.04517770670025	0.0334058665125818	0.0417516331992839
GMFB	21	Inverse variance weighted	0.0250917299811307	0.0117969403491645	1.02540917697492	1.00197166808312	1.04939492175058	0.0334226339032234	0.0417516331992839
CCBL1	21	Inverse variance weighted	0.0231232540853915	0.0108811466415451	1.02339266910149	1.00179782081346	1.04545301797546	0.0335803446201089	0.0417516331992839
EHD4	21	Inverse variance weighted	0.0233962977345994	0.0110121645805874	1.02367213812232	1.00181409864626	1.04600708632864	0.033621119703698	0.0417516331992839
SPHK1	21	Inverse variance weighted	0.0239478536323176	0.0112719643949247	1.02423690626371	1.00185652463013	1.04711724120374	0.0336241673144978	0.0417516331992839
TIRAP	21	Inverse variance weighted	0.0251891490027839	0.0118612273099344	1.0255090761997	1.00194302871395	1.04962940529446	0.0336990429221094	0.0417516331992839
PNKP	21	Inverse variance weighted	0.0233655467351839	0.0110027782473294	1.02364	1.00180172252549	1.04595567821329	0.0337032492103223	0.0417516331992839
SERAC1	21	Inverse variance weighted	0.0237245188102941	0.0111725839179958	1.02400818403831	1.00182792294908	1.04667951147808	0.033715445626266	0.0417516331992839
TNFSF12	21	Inverse variance weighted	0.0234759863979028	0.011059488214245	1.02375371643706	1.00180100937071	1.04618747846645	0.0337789173985607	0.0417516331992839
PCDHAC2	21	Inverse variance weighted	0.0226219930080152	0.010657735193803	1.02287981073831	1.00173433424915	1.0444716442711	0.0337882955627513	0.0417516331992839
EIF1AX	21	Inverse variance weighted	0.0228782108142452	0.0107795076300712	1.0231419243371	1.00175190866133	1.04498867262966	0.0338058449071737	0.0417516331992839
FAM107A	21	Inverse variance weighted	0.0264089624478041	0.0124432343479096	1.02676076921962	1.00202226515152	1.05211003175568	0.0338079258329616	0.0417516331992839
PTPRJ	21	Inverse variance weighted	0.0235779080495074	0.01111005740189	1.02385806442424	1.00180382047219	1.04639782227269	0.0338198568676067	0.0417516331992839
PIK3CG	21	Inverse variance weighted	0.0235623646999061	0.0111076960070845	1.02384215036409	1.00179288582735	1.04637671487997	0.0338995236708834	0.0417516331992839
RPL30	21	Inverse variance weighted	0.0230210296590248	0.010855625392945	1.02328805871991	1.0017455255481	1.04529386397391	0.0339508973010743	0.0417516331992839
NT5M	21	Inverse variance weighted	0.0232023431309328	0.0109426191833688	1.02347361145169	1.00175635011079	1.04566168532111	0.0339753036193114	0.0417516331992839
TYMSOS	21	Inverse variance weighted	0.0275866274318475	0.0130131634964285	1.0279706617087	1.0020829934017	1.05452710832526	0.0340143359289302	0.0417516331992839
SEZ6L2	21	Inverse variance weighted	0.0236277470342616	0.0111466160460572	1.02390909374232	1.0017819654007	1.04652496097679	0.0340293468536093	0.0417516331992839
CHIA	21	Inverse variance weighted	0.0228058166247177	0.0107616175249453	1.02306785748776	1.00171451437779	1.04487638543874	0.0340751636590133	0.0417516331992839
SCUBE3	21	Inverse variance weighted	0.0230901738650829	0.01089905343508	1.02335881560648	1.00172952303505	1.04545512675567	0.0341286376531922	0.0417516331992839
VPS26A	21	Inverse variance weighted	0.0233362657247688	0.0110168800965585	1.02361	1.00174470095827	1.04595396139777	0.0341557488683586	0.0417516331992839
MMP12	21	Inverse variance weighted	-0.0232224	0.0109633665895175	0.977045124529902	0.956274149582935	0.99826726026631	0.0341593835792999	0.0417516331992839
ARF5	21	Inverse variance weighted	0.0227641530958021	0.0107500564672583	1.02302523375843	1.00169547812043	1.04480917780548	0.0342102708655617	0.0417516331992839
ECE1	21	Inverse variance weighted	0.0230413161984565	0.0108813363753637	1.02330881790402	1.00171536646348	1.04536774802317	0.0342167619494292	0.0417516331992839
GOLM1	21	Inverse variance weighted	0.0234727235201612	0.0110857717583564	1.02375037605929	1.00174613359272	1.04623796123146	0.0342281295032119	0.0417516331992839
RPS3A	21	Inverse variance weighted	0.0269843898906995	0.0127454787969593	1.02735176556497	1.00200525929736	1.05333943152112	0.0342451259902909	0.0417516331992839
PPAPDC1A	21	Inverse variance weighted	0.0230660688662274	0.0108973712047563	1.02333414784071	1.00170867943686	1.04542647940876	0.0342884089619782	0.0417516331992839
FAM69C	21	Inverse variance weighted	0.023452302389735	0.0110808298091231	1.0237294701328	1.00173537999593	1.04620646225219	0.0343044053365121	0.0417516331992839
PAXIP1	21	Inverse variance weighted	0.0231024912343616	0.0109173267339753	1.02337142077255	1.0017059843742	1.04550544889506	0.0343336855515213	0.0417516331992839
LAMTOR3	21	Inverse variance weighted	0.0229151328405215	0.0108305855384811	1.02317970150752	1.00168860928282	1.04513	0.034363549811831	0.0417516331992839
SELPLG	21	Inverse variance weighted	0.0240352047261025	0.0113600872871121	1.02432637838546	1.0017710000148	1.04738960245482	0.0343653262011273	0.0417516331992839
THRA	21	Inverse variance weighted	0.025513737205153	0.0120590918157006	1.02584199837564	1.00187968163726	1.05037743046309	0.034368095971996	0.0417516331992839
SEMA4C	21	Inverse variance weighted	0.0261420571265028	0.0123573136100785	1.02648675787578	1.00192357014273	1.05165213744221	0.0343862513018034	0.0417516331992839
IGDCC3	21	Inverse variance weighted	0.0222923874748378	0.0105381575061084	1.02254271944954	1.00163894035995	1.04388275152673	0.0343961196129833	0.0417516331992839
ZP4	21	Inverse variance weighted	0.0255784927343447	0.012094036930972	1.02590842946798	1.00187593772334	1.05051740043295	0.034432733719311	0.0417516331992839
PVRL1	21	Inverse variance weighted	0.024285549933849	0.0114832649434286	1.0245828456868	1.00178	1.04790480748723	0.0344414934468356	0.0417516331992839
FCRL4	21	Inverse variance weighted	0.0235224816328585	0.0111263554634697	1.02380131721324	1.00171629607752	1.04637325082155	0.0345047813274639	0.0417516331992839
BMP15	21	Inverse variance weighted	0.0220490624758263	0.0104307815486665	1.02229393951176	1.00160601890967	1.0434091639147	0.0345284503031359	0.0417516331992839
RAB3C	21	Inverse variance weighted	0.0234725774025713	0.0111043639406552	1.02375022647137	1.00170948358285	1.04627593466673	0.034531022523915	0.0417516331992839
EFNB1	21	Inverse variance weighted	0.0236296308634719	0.0111799550214539	1.02391	1.00171839377077	1.04659531935315	0.0345519084974786	0.0417516331992839
CLEC4D	21	Inverse variance weighted	0.0229811667488926	0.0108741445220361	1.02325	1.00166923511021	1.04529013707193	0.0345685143517289	0.0417516331992839
RGS8	21	Inverse variance weighted	0.0231680213880139	0.0109737222607027	1.02343848465632	1.00166090353195	1.0456895424213	0.0347527843206456	0.0417516331992839
MAD1L1	21	Inverse variance weighted	0.0226262917623377	0.0107174162974009	1.02288420785677	1.00162146898095	1.04459831891109	0.0347576703828212	0.0417516331992839
CACNA2D3	21	Inverse variance weighted	0.0234411769610708	0.0111075448801181	1.02371808076697	1.00167178487285	1.04624960462696	0.0348253557393599	0.0417516331992839
UPK3BL	21	Inverse variance weighted	0.0231010044631467	0.0109511917162201	1.02336989925451	1.00163800877256	1.04557329247476	0.0349056543973967	0.0417516331992839
DDIT3	21	Inverse variance weighted	0.0257231808245786	0.0121947514388693	1.02605687693842	1.00182312788489	1.05087683185688	0.0349130955365523	0.0417516331992839
BCL2L10	21	Inverse variance weighted	0.0228192760942559	0.0108184279270186	1.02308162753109	1.00161646242648	1.04500680236023	0.0349189653684657	0.0417516331992839
CD163	21	Inverse variance weighted	0.02378973216999	0.0112843403059636	1.02407496522984	1.00167382445323	1.04697707857441	0.0350130348372327	0.0417516331992839
CLPSL2	21	Inverse variance weighted	0.0244612819875886	0.0116061864328092	1.02476291355588	1.00171462487037	1.0483415165626	0.0350649810443556	0.0417516331992839
RNF146	21	Inverse variance weighted	0.0231377687600445	0.0109792365712829	1.02340752342093	1.0016197755018	1.04566920962582	0.0350819307711539	0.0417516331992839
AOC2	21	Inverse variance weighted	0.023828944730742	0.0113120235698866	1.02411512261896	1.00165875274466	1.04707494593642	0.0351596614814791	0.0417516331992839
PLK1	21	Inverse variance weighted	0.0256864945988101	0.0121943371012993	1.02601923547465	1.00178718900229	1.0508374264722	0.0351671806406967	0.0417516331992839
SERPINA7	21	Inverse variance weighted	0.0232491338147979	0.0110379866116361	1.02352150160229	1.00161598435375	1.04591	0.0351796964087519	0.0417516331992839
RNF128	21	Inverse variance weighted	0.0228951254435536	0.0108713821166607	1.02315923054985	1.0015884767897	1.04519454378583	0.0352043946500139	0.0417516331992839
TNFSF13B	21	Inverse variance weighted	0.0232674097154364	0.0110534431610788	1.02354020755048	1.00160394606741	1.04595689801923	0.0352920021709344	0.0417516331992839
PRKCA	21	Inverse variance weighted	0.0232131394726108	0.011028448495625	1.02348466128215	1.00159865691288	1.04584889830872	0.0353050805253962	0.0417516331992839
PDGFD	21	Inverse variance weighted	0.0249406145005065	0.0118499170567242	1.02525423348178	1.00171624814026	1.04934530634181	0.0353167390328091	0.0417516331992839
SPOCK3	21	Inverse variance weighted	0.0226678094770349	0.0107722901934549	1.02292667655307	1.00155532896929	1.04475404936515	0.0353548820632612	0.0417516331992839
CYTH2	21	Inverse variance weighted	0.0227734003577804	0.0108299879734925	1.02303469398451	1.00154782056936	1.04498253962653	0.0354824352545505	0.0417516331992839
POLE3	21	Inverse variance weighted	0.0226231419844528	0.0107609992110355	1.02288098600378	1.00153275700389	1.04468426440495	0.0355246182474945	0.0417516331992839
WDR5	21	Inverse variance weighted	0.0229382977948097	0.0109114782977645	1.02320340369306	1.00155300499638	1.04532181532704	0.0355342502604495	0.0417516331992839
GP5	21	Inverse variance weighted	0.0230725137333079	0.0109760753581241	1.02334074311453	1.00156062253723	1.04559449817953	0.03554686504279	0.0417516331992839
G6B	21	Inverse variance weighted	0.0240330873341516	0.0114340855330401	1.02432420948733	1.00162359629696	1.04753930520498	0.0355636997774611	0.0417516331992839
PABPC3	21	Inverse variance weighted	0.0244984534296083	0.0116573047575348	1.02480100617908	1.0016514983286	1.04848553016502	0.0355923781161683	0.0417516331992839
CSK	21	Inverse variance weighted	0.0229710749314875	0.0109377323552381	1.02323694192051	1.00153429534376	1.0454098718122	0.0357140696944373	0.0417516331992839
GIPC1	21	Inverse variance weighted	0.0233109898082526	0.0111056646542	1.02358481449971	1.00154507949326	1.04610955006091	0.0358153156361004	0.0417516331992839
TSTA3	21	Inverse variance weighted	0.0247084658495818	0.0117732624920174	1.0250162497195	1.00163420522558	1.04894412222314	0.0358439551298439	0.0417516331992839
VPS24	21	Inverse variance weighted	0.0231226041069598	0.0110178996261137	1.02339200391855	1.00152868809399	1.04573259471737	0.0358486535921592	0.0417516331992839
ADAMTS4	21	Inverse variance weighted	0.0236764351265227	0.0112820568137862	1.02395894713637	1.00156482683726	1.04685378053016	0.0358528747258457	0.0417516331992839
DLK2	21	Inverse variance weighted	0.0232865515886269	0.0111005807086562	1.02355980021486	1.00153058354881	1.04607356163161	0.0359247799910962	0.0417516331992839
PCK1	21	Inverse variance weighted	0.0228691943830873	0.0109031472481067	1.02313269928997	1.00150014987755	1.04523251492709	0.0359506102944834	0.0417516331992839
RBBP9	21	Inverse variance weighted	0.0268637755249898	0.0128083677233636	1.02722785965597	1.00176092339508	1.05334222069394	0.0359615990404041	0.0417516331992839
C1QL2	21	Inverse variance weighted	0.0252790351945414	0.0120534132775972	1.02560125944811	1.00165571435435	1.05011924587237	0.0359713462393862	0.0417516331992839
IFNA5	21	Inverse variance weighted	0.0228697495546913	0.0109055809139347	1.02313326730434	1.00149592875018	1.04523808096876	0.0359875172791558	0.0417516331992839
SCUBE1	21	Inverse variance weighted	-0.0249377	0.0118984653249684	0.975370631572557	0.952887207708289	0.998384553007335	0.036092913625973	0.0417516331992839
NCL	21	Inverse variance weighted	0.0234194145057239	0.01117979640912	1.02369580239036	1.0015081496594	1.04637500572316	0.0361889581805262	0.0417516331992839
IMPA1	21	Inverse variance weighted	0.0307058724764622	0.0146634359671923	1.03118216022275	1.00196747091675	1.06124867166471	0.0362561072157187	0.0417516331992839
SDHAF2	21	Inverse variance weighted	0.02994380038142	0.0142999844881826	1.03039662442901	1.00191766716092	1.05968508035518	0.036262267370871	0.0417516331992839
PITPNB	21	Inverse variance weighted	0.022796246875242	0.0108897356783457	1.02305806703151	1.00145342013843	1.04512879727703	0.036316130945007	0.0417516331992839
DEFB107A	21	Inverse variance weighted	0.0247593306088677	0.0118290635441511	1.0250683882503	1.00157560602721	1.04911221306393	0.036340849636613	0.0417516331992839
MBD1	21	Inverse variance weighted	0.0234372800909027	0.0111977028544452	1.02371409147829	1.00149089277342	1.04643042553191	0.0363452642830938	0.0417516331992839
SPATA31D4	21	Inverse variance weighted	0.0221162675773554	0.0105668193378352	1.02236264518842	1.00140628957431	1.04375755291189	0.0363498751418781	0.0417516331992839
B3GALT6	21	Inverse variance weighted	0.0224441955757444	0.0107240317543562	1.02269796150108	1.00142610926526	1.0444216610508	0.0363591686485624	0.0417516331992839
STX1B	21	Inverse variance weighted	0.0274194926354704	0.0131026585959646	1.02779886639836	1.00173979347495	1.05453583520456	0.0363789498243365	0.0417516331992839
MDM1	21	Inverse variance weighted	0.0225175616699756	0.010760608474544	1.02277299560854	1.00142778737909	1.04457317215433	0.0363856040987315	0.0417516331992839
ANP32A	21	Inverse variance weighted	0.0234951426614571	0.0112310474615358	1.02377332792091	1.00148338877114	1.04655937254069	0.036440177441445	0.0417516331992839
RAB39B	21	Inverse variance weighted	0.0256409188476835	0.0122621841377776	1.0259724749429	1.0016083299151	1.05092927834345	0.0365230068025819	0.0417516331992839
BCL2L11	21	Inverse variance weighted	0.0220819528015998	0.0105615146275526	1.02232756364542	1.00138233868214	1.04371088545923	0.03654652241905	0.0417516331992839
COL4A3BP	21	Inverse variance weighted	0.022437092606783	0.0107315257790015	1.02269	1.00140428716904	1.04442958335268	0.0365491842273512	0.0417516331992839
IL7	21	Inverse variance weighted	0.0254851088286088	0.0121932665992501	1.02581263060501	1.00158756514346	1.05062361967129	0.0366090953015915	0.0417516331992839
SPOP	21	Inverse variance weighted	0.0225481894277349	0.0107896639428183	1.02280432133181	1.00140142918518	1.04466465619709	0.0366361881513571	0.0417516331992839
SOSTDC1	21	Inverse variance weighted	0.024596675663588	0.0117717131928445	1.02490166936689	1.00152527986345	1.04882368222823	0.0366651752457752	0.0417516331992839
PARK2	21	Inverse variance weighted	0.0225844328501878	0.0108090549915422	1.02284139193269	1.00139966368293	1.04474222530003	0.036671786562478	0.0417516331992839
CSNK2A2	21	Inverse variance weighted	0.0227210560480485	0.0108759139691401	1.02298114534112	1.00140525110985	1.04502190553087	0.036697198336761	0.0417516331992839
HCN1	21	Inverse variance weighted	0.022491730477055	0.0107667563766759	1.02274657650319	1.00138985293036	1.04455877667231	0.0367079204312048	0.0417516331992839
TMEM237	21	Inverse variance weighted	0.0259109992911951	0.0124092348661051	1.02624960746632	1.00159016192239	1.05151617584117	0.036794077446931	0.0417516331992839
BIRC5	21	Inverse variance weighted	0.022665937535709	0.0108569376341914	1.02292476169614	1.00138730118591	1.04492544178654	0.0368256627691584	0.0417516331992839
GMNN	21	Inverse variance weighted	0.0224460187229736	0.0107521465500627	1.02269982603173	1.00137275284863	1.04448111973288	0.0368352957575756	0.0417516331992839
MCCD1	21	Inverse variance weighted	0.0297297541943972	0.0142543337925538	1.03017609556295	1.00179286522545	1.05936349190357	0.0370090482364152	0.0417516331992839
PAFAH2	21	Inverse variance weighted	0.0227391941928465	0.0109070555644358	1.02299970048954	1.00136229236492	1.04510464911765	0.0370860870584201	0.0417516331992839
VIMP	21	Inverse variance weighted	0.0229394136085319	0.0110039306870638	1.0232045453981	1.00137265068562	1.0455124183854	0.0371005086068842	0.0417516331992839
OAF	21	Inverse variance weighted	0.0234382352957373	0.0112464219078698	1.02371506933541	1.00139622216815	1.0465313529098	0.0371545703813306	0.0417516331992839
CSDC2	21	Inverse variance weighted	0.0226167343675519	0.010852350744794	1.02287443179529	1.00134703334326	1.04486463571703	0.0371565178832803	0.0417516331992839
SEMA6C	21	Inverse variance weighted	0.0248297002650632	0.0119150500020064	1.02514052449843	1.00147729238404	1.04936287917941	0.0371698174514732	0.0417516331992839
DUSP23	21	Inverse variance weighted	0.0224385262591861	0.0107687983858965	1.02269216351903	1.00133256850426	1.04450738368126	0.0371910052562888	0.0417516331992839
GADD45GIP1	21	Inverse variance weighted	0.0289424388980624	0.0138904176179733	1.02936534136646	1.00171869563406	1.05777501271033	0.037194176529388	0.0417516331992839
HIBADH	21	Inverse variance weighted	0.0255975114606944	0.0122851669966493	1.0259279411252	1.00151973778006	1.05093100083519	0.0371955480594736	0.0417516331992839
NRXN2	21	Inverse variance weighted	0.0224122658644086	0.0107583953352413	1.0226653075717	1.00132669028329	1.04445865815765	0.0372298069350078	0.0417516331992839
CR2	21	Inverse variance weighted	0.0238032677458783	0.0114263834989802	1.02408882676806	1.00140854715989	1.04728277792873	0.0372343874713711	0.0417516331992839
FCRL4	21	Inverse variance weighted	0.0206037832097598	0.00989106805326026	1.02081750646319	1.00121803102335	1.04080065401602	0.0372448795611883	0.0417516331992839
STK24	21	Inverse variance weighted	0.0228589428247945	0.0109747034876051	1.02312221063922	1.00134943365642	1.04536840259746	0.0372625583099841	0.0417516331992839
C1orf210	21	Inverse variance weighted	0.0263677520830362	0.0126598575392802	1.02671845690565	1.00155564006062	1.05251345765166	0.0372708924555851	0.0417516331992839
IFNL1	21	Inverse variance weighted	0.0230546300779156	0.011074971706519	1.02332244220497	1.00134859406938	1.04577849005078	0.0373710238471144	0.0417516331992839
RAD23A	21	Inverse variance weighted	0.022640069391729	0.0108778990663312	1.02289830087338	1.00132025799596	1.04494134176786	0.0374073123707877	0.0417516331992839
SCAMP5	21	Inverse variance weighted	0.0258192852669155	0.0124056750935739	1.0261554903009	1.00150529390271	1.05141240559132	0.037411221021357	0.0417516331992839
IDUA	21	Inverse variance weighted	0.0260813651341766	0.0125362277678042	1.02642446023985	1.00151149987545	1.05195713949335	0.0374815721538016	0.0417516331992839
ZNRF3	21	Inverse variance weighted	0.0265114608190517	0.0127445620027732	1.02686601591984	1.00153329358802	1.05283950259254	0.0375055884536625	0.0417516331992839
SORT1	21	Inverse variance weighted	0.0219890316669273	0.0105748440106526	1.02223257222162	1.00126313448927	1.04364117255135	0.0375831969685061	0.0417516331992839
RAC2	21	Inverse variance weighted	0.0230921758767966	0.01110628391438	1.02336086438487	1.0013247360933	1.04588194119771	0.0375990513968811	0.0417516331992839
MAGEA6	21	Inverse variance weighted	0.0227992576205278	0.0109659254332444	1.0230611472034	1.00130689701795	1.0452880271116	0.0376081429130563	0.0417516331992839
YTHDC1	21	Inverse variance weighted	0.0282629161938222	0.0135994712513829	1.02866610184752	1.00160924598997	1.05645385496048	0.0376875909055874	0.0417516331992839
PTH1R	21	Inverse variance weighted	0.0223682892044309	0.0107649626245886	1.02262033515608	1.00126976793377	1.04442617101358	0.037720510040304	0.0417516331992839
IST1	21	Inverse variance weighted	0.0229593999779409	0.0110547038484243	1.02322499574648	1.00129301565988	1.04563736643104	0.0378117454768758	0.0417516331992839
KIF23	21	Inverse variance weighted	0.0229389921668906	0.0110504367786593	1.02320411417718	1.00128095580466	1.04560728255114	0.0379083036991531	0.0417516331992839
LGALS4	21	Inverse variance weighted	0.0234099775982895	0.0112845690247732	1.02368614191342	1.00129305758873	1.04658	0.0380317546981212	0.0417516331992839
C11orf68	21	Inverse variance weighted	0.0227386849297412	0.0109616635556709	1.02299917951367	1.00125461072701	1.04521598210245	0.0380437853683972	0.0417516331992839
SEMA7A	21	Inverse variance weighted	0.0234884732802407	0.0113249164077753	1.02376650000907	1.00129247164349	1.04674495836418	0.0380744181698824	0.0417516331992839
ALPL	21	Inverse variance weighted	0.0230405949784152	0.0111110922596458	1.02330807987346	1.00126365188558	1.04583785136142	0.0381111712463763	0.0417516331992839
GOSR1	21	Inverse variance weighted	0.0251948706459174	0.0121509321895152	1.02551494381345	1.00137999487228	1.05023158578161	0.0381264386775679	0.0417516331992839
PIK3C2A	21	Inverse variance weighted	0.0227229223828449	0.0109621612522167	1.02298305456821	1.00123785183543	1.04520052654354	0.0381861868880932	0.0417516331992839
DPEP1	21	Inverse variance weighted	0.0244351579144271	0.011788348814462	1.02473614292423	1.00133087907265	1.04868848505674	0.0381887759648689	0.0417516331992839
SPINK8	21	Inverse variance weighted	0.0276227070676961	0.0133289862287926	1.02800775118492	1.00149901646291	1.05521814712177	0.0382301387678537	0.0417516331992839
RPLP2	21	Inverse variance weighted	0.022209093767496	0.0107184916174428	1.02245755162254	1.00120157150661	1.04416480619065	0.0382621425728767	0.0417516331992839
HAVCR2	21	Inverse variance weighted	0.0218445520446741	0.0105458598254705	1.02208489111444	1.00118	1.04343112059576	0.0383226881859303	0.0417516331992839
CXCL5	21	Inverse variance weighted	0.02232162259529	0.0107802206207756	1.02257261404609	1.00119310135838	1.04440866559943	0.0383953438622502	0.0417516331992839
PTGES3	21	Inverse variance weighted	0.0226659105185825	0.0109489632687203	1.02292473405966	1.00120666995295	1.04511390400565	0.0384390333940198	0.0417516331992839
CECR1	21	Inverse variance weighted	0.0234998277919673	0.0113535022827618	1.0237781244438	1.00124774109977	1.0468154933747	0.0384681996070761	0.0417516331992839
CHST1	21	Inverse variance weighted	0.0220470682527393	0.0106519547824706	1.02229190083161	1.00116992070303	1.04385949766854	0.0384741360073703	0.0417516331992839
PCDHB10	21	Inverse variance weighted	0.0250530270821334	0.0121074187512964	1.02536949143509	1.00132336120026	1.04999307387135	0.0385245631901445	0.0417516331992839
EFNA2	21	Inverse variance weighted	0.0227885321672279	0.0110138125693095	1.02305017446768	1.00120218157302	1.04537492900181	0.0385379595400139	0.0417516331992839
WISP1	21	Inverse variance weighted	0.0257942659604425	0.0124708386028672	1.02612981692337	1.00135233588144	1.05152039242245	0.038605564053852	0.0417516331992839
SUMO2	21	Inverse variance weighted	0.0228823735200838	0.0110658363610673	1.02314618338483	1.00119404655902	1.04557964180147	0.0386551180588567	0.0417516331992839
UROD	21	Inverse variance weighted	0.0288864748832182	0.0139728856644014	1.02930773556116	1.00150074397182	1.0578867972522	0.0387036814185802	0.0417516331992839
UBE2L6	21	Inverse variance weighted	0.0254353033255919	0.0123041876175203	1.02576154076323	1.00131996598451	1.05079971862384	0.0387146486581343	0.0417516331992839
MFAP3L	21	Inverse variance weighted	0.023476676372516	0.0113568412464784	1.02375442280138	1.00121800870024	1.04679810900122	0.0387168536261867	0.0417516331992839
USP25	21	Inverse variance weighted	0.0222842875086606	0.0107828493341429	1.02253443692164	1.00115056420547	1.04437505413629	0.0387679159188364	0.0417516331992839
CSF3	21	Inverse variance weighted	0.0283337268447929	0.0137138194604138	1.02873894494283	1.00145569920535	1.05676548416653	0.0388217611782693	0.0417516331992839
PCOLCE2	21	Inverse variance weighted	0.0233396192007401	0.0113024682125399	1.0236141195306	1.00119	1.04654311040203	0.03892281326046	0.0417516331992839
GAN	21	Inverse variance weighted	0.023737840603149	0.0114976440973208	1.02402182575409	1.00120318141509	1.04736053489026	0.0389624726453017	0.0417516331992839
HMBS	21	Inverse variance weighted	-0.0224965	0.0108978981830471	0.977754672419069	0.957091417464118	0.998864039519152	0.0389896688819749	0.0417516331992839
CHST2	21	Inverse variance weighted	0.0225455331000465	0.0109288072408064	1.02280160443198	1.00112570403776	1.04494682117279	0.0391178118719818	0.0417516331992839
NATD1	21	Inverse variance weighted	0.0235961145446482	0.0114436333553794	1.02387670546081	1.0011672739026	1.04710125401809	0.0392132058558668	0.0417516331992839
ILF3	21	Inverse variance weighted	0.0222881707352076	0.0108125828068161	1.02253840766222	1.0010961087224	1.04443997537736	0.0392727193977728	0.0417516331992839
CDKN1A	21	Inverse variance weighted	0.023664021073294	0.0114807646796162	1.02394623573439	1.00116239736198	1.04724857469407	0.0392850523852986	0.0417516331992839
MBD4	21	Inverse variance weighted	0.0227374501518752	0.0110321531936086	1.0229979163377	1.00111505110014	1.04535910800786	0.0393014626054989	0.0417516331992839
STAT3	21	Inverse variance weighted	0.0227230076017947	0.0110263927907961	1.02298314174576	1.00111189542972	1.04533220819119	0.0393237055905566	0.0417516331992839
GABARAPL1	21	Inverse variance weighted	0.0219500817049226	0.0106526810561335	1.02219275707717	1.00107140037466	1.04375974803594	0.0393486825480971	0.0417516331992839
CRKL	21	Inverse variance weighted	0.0226336051658108	0.0109886235933615	1.02289168864904	1.00109650364385	1.04516138344192	0.0394242945543762	0.0417516331992839
GMPR	21	Inverse variance weighted	0.0186240792000701	0.00904616867470363	1.01879858904133	1.00089398796689	1.03702347852142	0.0395152330849652	0.0417516331992839
HTR2A	21	Inverse variance weighted	0.022338841810079	0.0108554972094261	1.02259022209517	1.00106263147278	1.04458075793541	0.0396058006875444	0.0417516331992839
SYNCRIP	21	Inverse variance weighted	0.0224418723730111	0.0109136788447541	1.02269558556914	1.00105161439636	1.04480752610672	0.039752950165842	0.0417516331992839
CDKN2B	21	Inverse variance weighted	0.0233318247277621	0.0113474338734595	1.0236061410291	1.00109144953378	1.04662719119262	0.0397697705613272	0.0417516331992839
TBP	21	Inverse variance weighted	0.0244255928994074	0.0118867727541121	1.02472634135451	1.00112815418908	1.04888077542516	0.0398930244374026	0.0417516331992839
ARL3	21	Inverse variance weighted	0.0228818107644505	0.011136127011394	1.02314560760371	1.0010555585323	1.04572311240505	0.0399044266619902	0.0417516331992839
LRRC32	21	Inverse variance weighted	0.0234870967898178	0.0114326795268176	1.02376509080526	1.00107962729567	1.04696462955982	0.0399386851190483	0.0417516331992839
SLC4A8	21	Inverse variance weighted	0.0235695570702307	0.0114750819084726	1.02384951424247	1.00107897820824	1.04713798874367	0.0399778945927175	0.0417516331992839
CA13	21	Inverse variance weighted	0.0218604389652758	0.0106453383072741	1.02210112902494	1.00099607163319	1.04365116663202	0.04002195505805	0.0417516331992839
LEAP2	21	Inverse variance weighted	0.0227261601705555	0.0110691051766838	1.02298636677553	1.0010312453925	1.04542301893711	0.0400613002875628	0.0417516331992839
PMS2	21	Inverse variance weighted	0.0221965317800748	0.0108116226411901	1.02244470760431	1.00100625734089	1.04434230299928	0.040070151078793	0.0417516331992839
AIP	21	Inverse variance weighted	0.0226109672279307	0.0110136945592362	1.02286853275263	1.00102465048782	1.04518908179301	0.0400738781731444	0.0417516331992839
ABHD14A	21	Inverse variance weighted	0.0226931557991211	0.0110553361128286	1.02295260431067	1.00102522219933	1.04536030407594	0.0401028463998922	0.0417516331992839
SRP14	21	Inverse variance weighted	0.0218977802250839	0.0106684556278485	1.02213929628135	1.00098809503907	1.04373742922662	0.0401140424918464	0.0417516331992839
STXBP6	21	Inverse variance weighted	0.0231955654642853	0.011302702039783	1.02346667471224	1.00104281281789	1.04639284237795	0.0401488514314297	0.0417516331992839
GRAP2	21	Inverse variance weighted	0.0224947777360436	0.0109665716311779	1.02274969308164	1.00100079780318	1.04497112988742	0.040246177912348	0.0417516331992839
TSTD1	21	Inverse variance weighted	0.0225192486696002	0.0109793831217837	1.02277472102765	1.00100015757525	1.04502294236108	0.0402622115508488	0.0417516331992839
CSN2	21	Inverse variance weighted	0.0218691221449558	0.0106632141230853	1.02211000415123	1.00096969231158	1.04369679582748	0.0402772680370181	0.0417516331992839
KREMEN1	21	Inverse variance weighted	0.0234055306224521	0.011416150048274	1.02368	1.00103040703277	1.04684532013865	0.0403437235695339	0.0417516331992839
BCL2	21	Inverse variance weighted	0.0224803325948913	0.0109685981923271	1.02273491942467	1.00098236234004	1.04496018587713	0.0404115504304055	0.0417516331992839
ADPRH	21	Inverse variance weighted	0.0249928928005138	0.0121957638016621	1.02530783343123	1.00108978913837	1.05011175291304	0.0404318748636961	0.0417516331992839
CIRBP	21	Inverse variance weighted	0.0226908593248504	0.011073423257741	1.02295025512903	1.00098743693484	1.04539496287072	0.040449620738689	0.0417516331992839
HDLBP	21	Inverse variance weighted	0.0222025772939139	0.0108371020749723	1.02245088882663	1.00096231995998	1.04440077235291	0.040485985703992	0.0417516331992839
ARFIP1	21	Inverse variance weighted	0.0228094194123052	0.0111338259541762	1.02307154339057	1.00098760790595	1.04564269790032	0.0404954124081523	0.0417516331992839
PCDHGA10	21	Inverse variance weighted	0.0245307391299653	0.0119799253062389	1.02483409313141	1.00105063706258	1.04918260831076	0.0405939374071631	0.0417516331992839
RPS19	21	Inverse variance weighted	0.024955457040805	0.0121899399182364	1.02526945097199	1.00106374017174	1.05006045560702	0.0406367442667168	0.0417516331992839
FOXRED1	21	Inverse variance weighted	0.0221317690875853	0.0108111479793239	1.02237849347625	1.00094236279317	1.04427369924272	0.040645833067437	0.0417516331992839
CLTC	21	Inverse variance weighted	0.0239273254253335	0.0116892951983058	1.02421588073231	1.00101682345145	1.04795258757721	0.0406636441135334	0.0417516331992839
TRAPPC4	21	Inverse variance weighted	0.0249885201535471	0.012209587961938	1.02530335013184	1.00105828733942	1.05014	0.0406943372935529	0.0417516331992839
STIM1	21	Inverse variance weighted	0.0222879976726022	0.0108902206874718	1.02253823069908	1.00094361004525	1.04459873937747	0.0406967250615526	0.0417516331992839
PRKCB	21	Inverse variance weighted	0.0225546889767989	0.0110216455564386	1.02281096912028	1.0009527172332	1.04514654942391	0.0407170899691965	0.0417516331992839
GDF3	21	Inverse variance weighted	0.0238849559231358	0.0116747978450226	1.02417248613461	1.00100285466969	1.04787841159681	0.0407705345234363	0.0417516331992839
RORB	21	Inverse variance weighted	0.0221163442477973	0.0108117112200604	1.02236272357341	1.00092581856215	1.04425874442318	0.0407965814068726	0.0417516331992839
CLIC1	21	Inverse variance weighted	0.0222758622847255	0.0108998	1.02252582187632	1.00091265969792	1.0446056868932	0.0409838302738051	0.0417516331992839
ERBB2	21	Inverse variance weighted	0.0256859243839076	0.0125695769025335	1.02601865042336	1.00105010462912	1.0516099705185	0.0410030147075847	0.0417516331992839
FTMT	21	Inverse variance weighted	0.0213043199265609	0.0104254869708509	1.02153287715009	1.00087074434163	1.04262156227272	0.0410045106735049	0.0417516331992839
TNNI3	21	Inverse variance weighted	0.0287543422929643	0.0140748747537049	1.02917173944885	1.00116826967168	1.05795848846421	0.0410568469603982	0.0417516331992839
NUDT1	21	Inverse variance weighted	0.0253724846724938	0.0124198969025134	1.02569710582872	1.00103001684694	1.05097203400472	0.041063316593765	0.0417516331992839
MAP2K3	21	Inverse variance weighted	0.0224617087537447	0.0109964655814398	1.02271587234936	1.00090904914907	1.04499780119335	0.0410890946667695	0.0417516331992839
PKD2	21	Inverse variance weighted	0.0219191733652546	0.0107308716725778	1.02216116328449	1.00088705809052	1.04388745491463	0.041089328645514	0.0417516331992839
ZFAND1	21	Inverse variance weighted	0.0228664593537024	0.0111985972519768	1.0231299009958	1.0009176295044	1.04583510516243	0.0411610652906703	0.0417516331992839
ALDH2	21	Inverse variance weighted	0.0224287038339476	0.0109869726881549	1.02268211825104	1.0008946373146	1.04494386921337	0.0412120084075373	0.0417516331992839
BTD	21	Inverse variance weighted	0.022755319728361	0.011148153522209	1.02301619704055	1.00090534840551	1.04561549308786	0.0412335474448592	0.0417516331992839
RAC1	21	Inverse variance weighted	0.0225086340379976	0.0110303549485295	1.02276386470839	1.00088953373955	1.04511625678109	0.0412897749196063	0.0417516331992839
PPP3R2	21	Inverse variance weighted	0.0223513181957139	0.0109533294949428	1.02260298040472	1.00088318216151	1.04479411201043	0.0412910197059368	0.0417516331992839
NOVA1	21	Inverse variance weighted	0.0215517915696957	0.0105627959328699	1.02178570885276	1.00084907179882	1.04316031680908	0.0413155639717837	0.0417516331992839
NPIPB3	21	Inverse variance weighted	0.0223706134754943	0.0109661504806391	1.02262271200569	1.00087734317401	1.04484052740523	0.0413533548888128	0.0417516331992839
STAMBPL1	21	Inverse variance weighted	0.022298158734376	0.0109307844787406	1.02254862082599	1.00087420304898	1.04469240866424	0.0413561722954271	0.0417516331992839
HMGB1	21	Inverse variance weighted	0.0219937713930222	0.0107830127594056	1.0222374173355	1.0008594354878	1.04407202485077	0.0413833549797198	0.0417516331992839
PARK7	21	Inverse variance weighted	0.0224894086185537	0.0110278750456597	1.02274420183312	1.00087515625502	1.0450910843837	0.0414177166437018	0.0417516331992839
ENAH	21	Inverse variance weighted	0.0215796159111846	0.0105838993827675	1.02181413976278	1.00083552197514	1.04323249254645	0.0414590331336968	0.0417516331992839
ISCU	21	Inverse variance weighted	0.0255029046475542	0.0125097445980042	1.02583088594329	1.00098428933058	1.05129422886243	0.0414856592723248	0.0417516331992839
CSNK2A1	21	Inverse variance weighted	0.0218033492947407	0.0106952602656806	1.02204277927383	1.00084099261015	1.04369370397348	0.0414900425978332	0.0417516331992839
BDH2	21	Inverse variance weighted	0.0221724808257309	0.0108791525969431	1.02242011712905	1.00084970252855	1.04445541949926	0.0415428750332875	0.0417516331992839
