# Supplementary material for: NLRC5-Mediated Epigenetic and Proteomic Regulation of Microglial Panoptosis Drives Neuroinflammation in Multiple Sclerosis
Source: Research Square preprint supplement (doi:10.21203/rs.3.rs-6759227/v1), 2025-06-26
Supplement: Supplementary file 9 [file 6a3fb4abb87bee8026148c85.xlsx]

## Sheet: UKB-PPP and deCODE Iceland
Overlapping NLRC5 downstream proteins between UKB-PPP and deCODE Iceland pQTL databases
BTN2A1
KLRB1
MANSC1
LAP3
FGFBP3
CDH6
FCGR3B
GABARAP
GABARAPL1
BRSK2
KCTD5
TREML2
GALNT2
IGFBPL1
DOC2B
FCRL1
CINP
LGALS1
MARCO
B2M
BTLA
CSPG4
IL20RB
TMPRSS11B
GBP1
FCER2
BATF
GADD45GIP1
MDM1
CCL11
CR2
C1QBP
LRP2
CEACAM3
TMPRSS5
ENPP2
CD80
CLSTN1
ENAH
XCL1
CD4
TNNI3
CD72
C1QTNF9
TNFSF12
LY9
CSF2RA
AK2
HSP90B1
LONP1
FCN1
CREG1
ECE1
VEGFB
C1QL2
C1QTNF1
ESAM
CLEC4M
MFAP3L
MB
DPEP1
VCAM1
ARSB
DLK1
IGF2R
BCAM
ACADM
ZP4
BCL2
ACRV1
DPP7
CLEC6A
JAM2
CSF1R
LILRA5
CLEC4D
C1GALT1C1
TMEM106A

## Sheet: UKB-PPP, deCODE Iceland,  Apopt
UKB-PPP AND deCODE Iceland AND Apoptosis genes
GABARAP
BRSK2
TNFSF12

## Sheet: UKB-PPP, deCODE Iceland, Necrop
UKB-PPP AND deCODE Iceland AND Necroptosis gene
BCL2
