# Supplementary material for: NLRC5-Mediated Epigenetic and Proteomic Regulation of Microglial Panoptosis Drives Neuroinflammation in Multiple Sclerosis
Source: Research Square preprint supplement (doi:10.21203/rs.3.rs-6759227/v1), 2025-06-26
Supplement: Supplementary file 10 [file 96c65d36641e7e0cbbccdd8e.xlsx]

## Sheet: NLRC5cg
cg00881185
cg03056682
cg04097610
cg06181531
cg06862692
cg00589550
cg03146649
cg04799664
cg04972244
cg05723552
cg05757530
cg06754565
cg07223648
cg07839457
cg08159663
cg08558449
cg09561419
cg09624807
cg16411857
cg17625032
