# Supplementary material for: NLRC5-Mediated Epigenetic and Proteomic Regulation of Microglial Panoptosis Drives Neuroinflammation in Multiple Sclerosis
Source: Research Square preprint supplement (doi:10.21203/rs.3.rs-6759227/v1), 2025-06-26
Supplement: Supplementary file 11 [file a84671a6272b11e091efa4df.xlsx]

## Sheet: Sheet1
Table S1. List of GEO datasets and GWAS data used in this study
GEO Datasets	Source	No. Of Sample	Type of tissue or cell	Disease stage
Self-generated cohort GSE253318	Deposited to GEO	16	EAE brain microglia	Day 14 p.i.
GSE154228	GEO	10	EAE spinal cord microglia	Day 14-16 p.i.
GSE78809	GEO	6	EAE brain microglia	No details provided
Data source of GWAS
Phenotype	Sample size	Ancestry	Dataset resource	Study reference or description URL
NLRC5 cis-eQTLs	31684	Eur	eQTLGen Consortium	www.eqtlgen.org
UKB-PPP pQTLs	54219	Eur and non-Eur	UKB-PPP v1.0	PMID: 37794186
deCODE Iceland pQTLs	35559	Icelanders	deCODE Iceland cohort	PMID: 34857953
Multiple sclerosis	115803	Eur	IMSGC	https://gwas.mrcieu.ac.uk/datasets/. GWAS ID:ieu-b-18
NLRC5 mQTLs	2358	Eur dominant	MeQTL EPIC Database	https://epicmeqtl.kcl.ac.uk
