# Supplementary material for: NLRC5-Mediated Epigenetic and Proteomic Regulation of Microglial Panoptosis Drives Neuroinflammation in Multiple Sclerosis
Source: Research Square preprint supplement (doi:10.21203/rs.3.rs-6759227/v1), 2025-06-26
Supplement: Supplementary file 12 [file b803da391741415b8f6376be.docx]

**Supplementary material**

**Supplementary Figures**

a

b


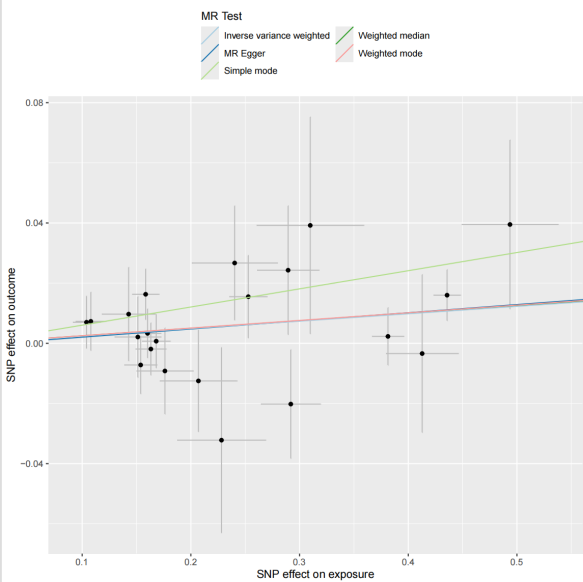

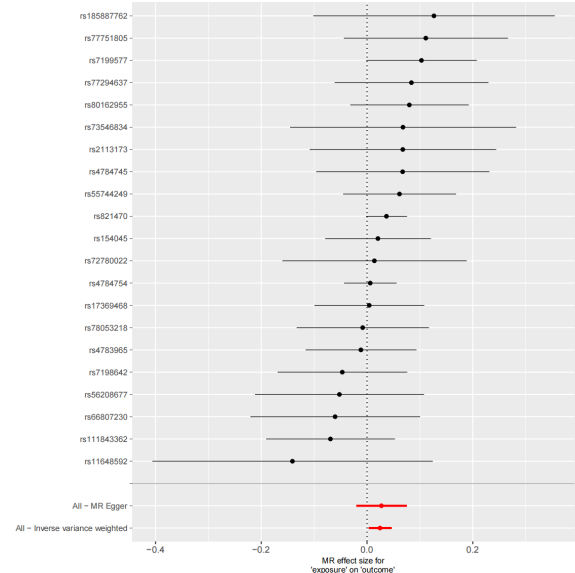


c

d


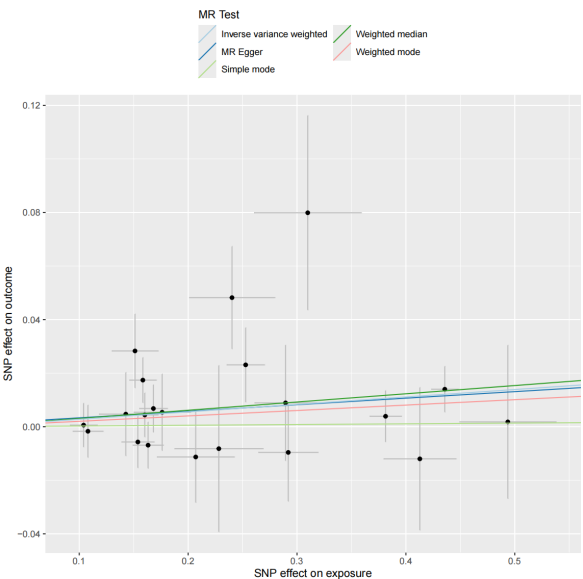

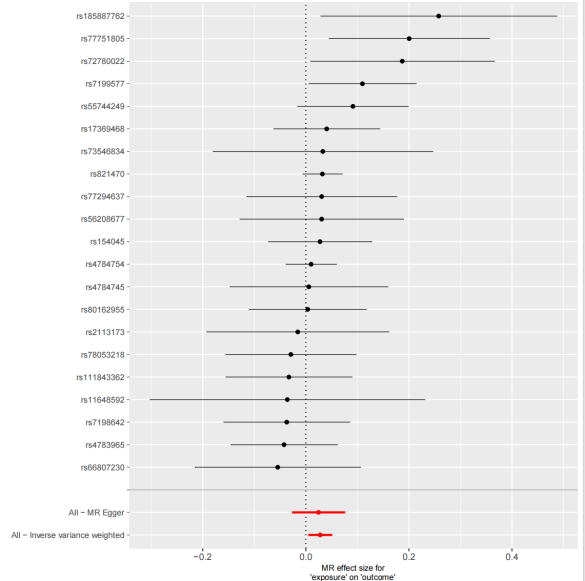


f

e


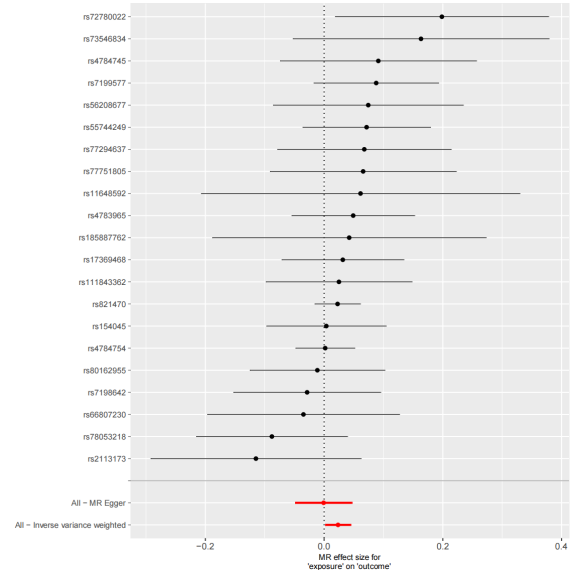

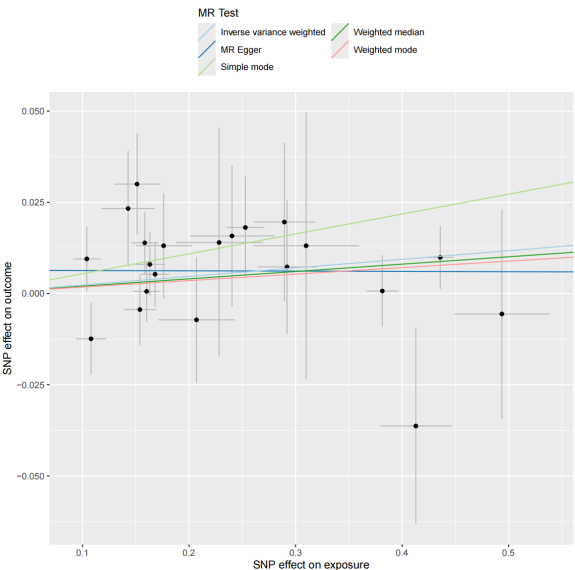


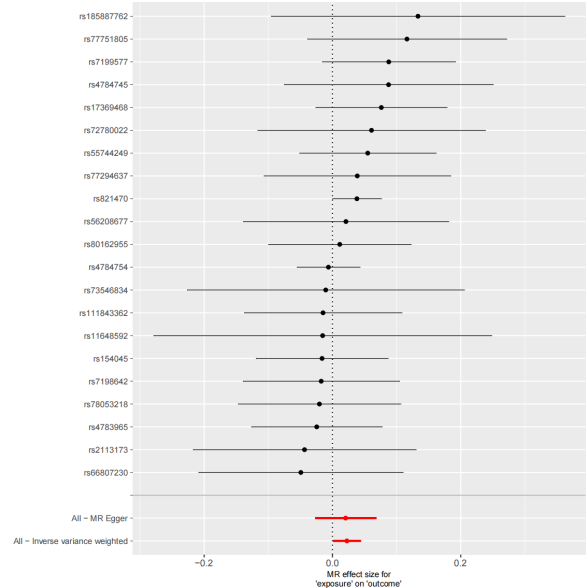

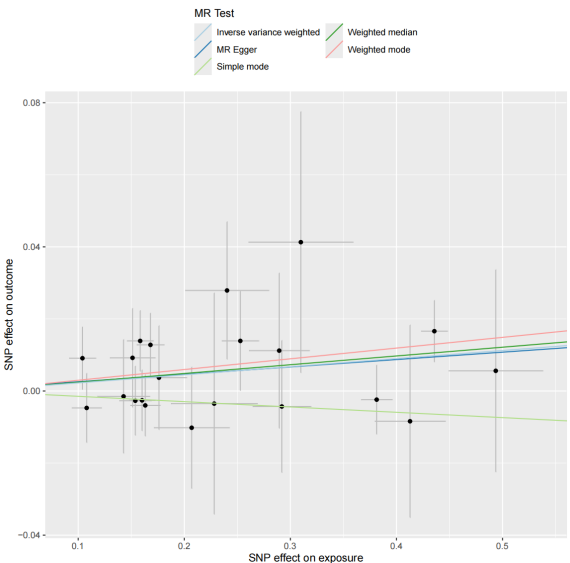


h

g

**Fig S1. Mendelian randomization (MR) analysis of causal effects between NLRC5 expression quantitative trait loci (eQTL) and protein quantitative trait loci (pQTL) from deCODE Iceland cohort.**

(a)Scatterplot of genetic variant associations between NLRC5 eQTL (x-axis) and GABARAP pQTL (y-axis). Each point represents a single nucleotide polymorphism (SNP), with slopes of regression lines indicating causal effect estimates (β) from inverse-variance weighted (IVW), MR-Egger, and weighted median methods. Error bars denote 95% confidence intervals (CI).

(b) Forest plot of individual SNP-specific and IVW-combined MR effect sizes (β ± 95% CI) for NLRC5 eQTL on GABARAP pQTL.

(c-d) Corresponding scatterplot (c) and forest plot (d) for NLRC5 eQTL effects on BRSK2 pQTL.

(e-f) Scatterplot (e) and forest plot (f) for NLRC5 eQTL effects on TNFSF12 pQTL.

(g-h) Scatterplot (g) and forest plot (h) for NLRC5 eQTL effects on BCL2 pQTL.

a

b


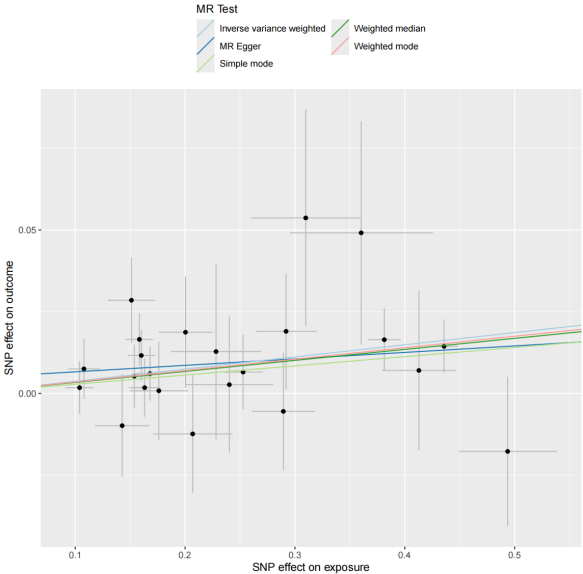

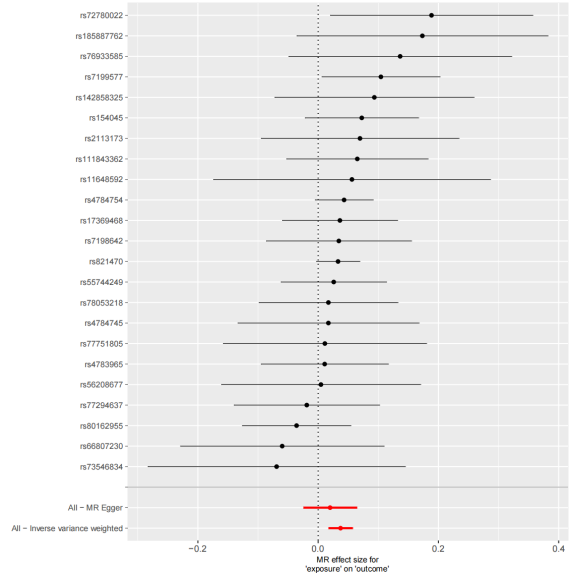


c

d


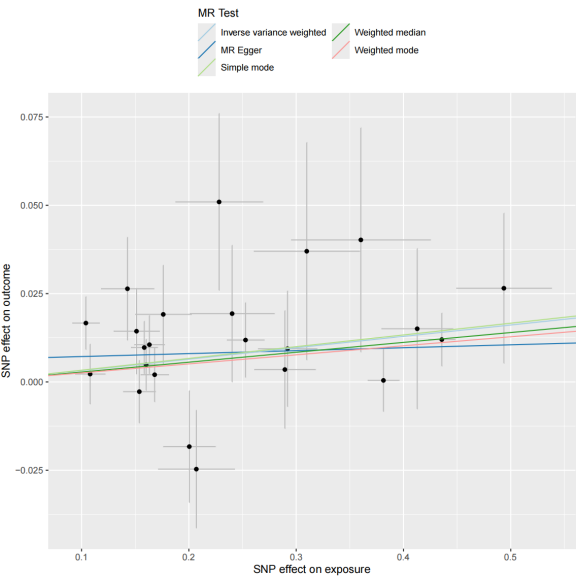

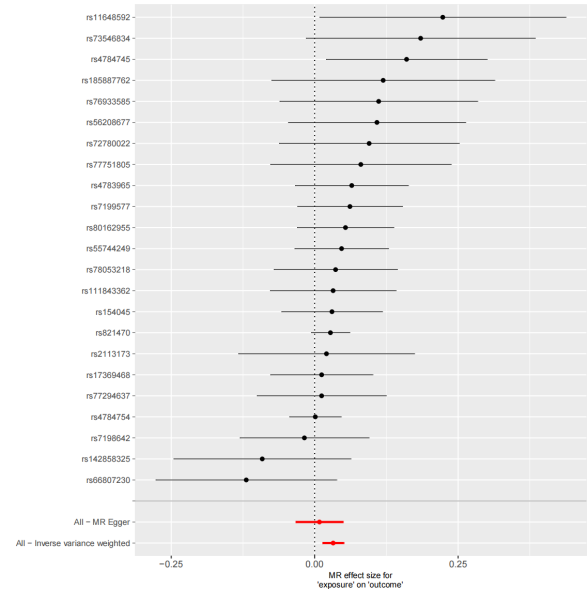


e

f


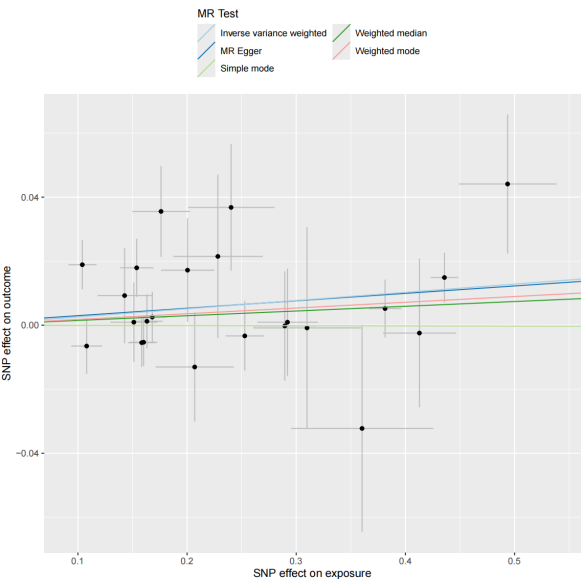

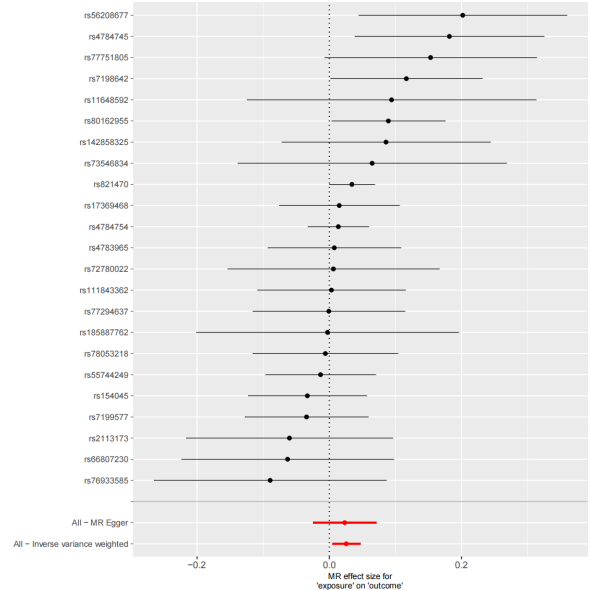


h

g


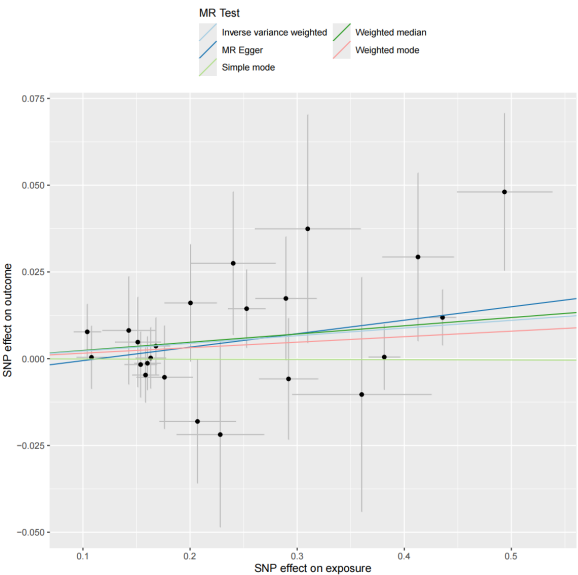

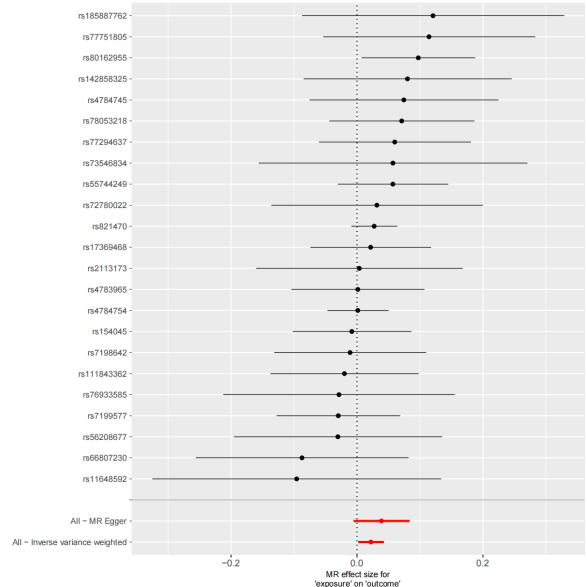


**Fig S2. Mendelian randomization (MR) analysis of causal effects between NLRC5 expression quantitative trait loci (eQTL) and protein quantitative trait loci (pQTL) from UKB-PPP cohort.**

(a)Scatterplot of genetic variant associations between NLRC5 eQTL (x-axis) and GABARAP pQTL (y-axis). Each point represents a single nucleotide polymorphism (SNP), with slopes of regression lines indicating causal effect estimates (β) from inverse-variance weighted (IVW), MR-Egger, and weighted median methods. Error bars denote 95% confidence intervals (CI).

(b) Forest plot of individual SNP-specific and IVW-combined MR effect sizes (β ± 95% CI) for NLRC5 eQTL on GABARAP pQTL.

(c-d) Corresponding scatterplot (c) and forest plot (d) for NLRC5 eQTL effects on BRSK2 pQTL.

(e-f) Scatterplot (e) and forest plot (f) for NLRC5 eQTL effects on TNFSF12 pQTL.

(g-h) Scatterplot (g) and forest plot (h) for NLRC5 eQTL effects on BCL2 pQTL.

a

b


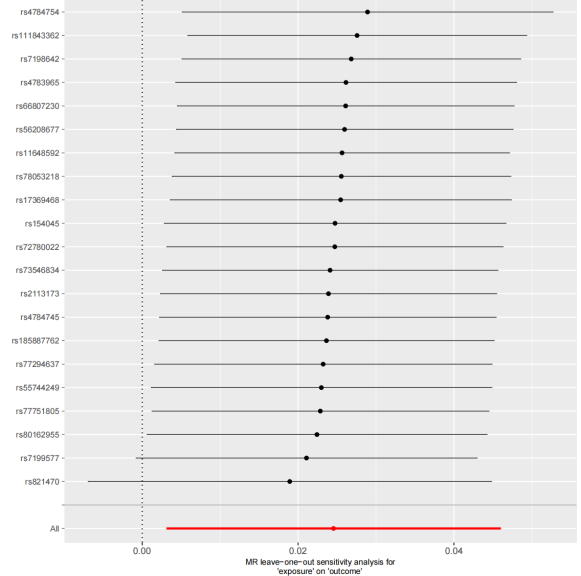

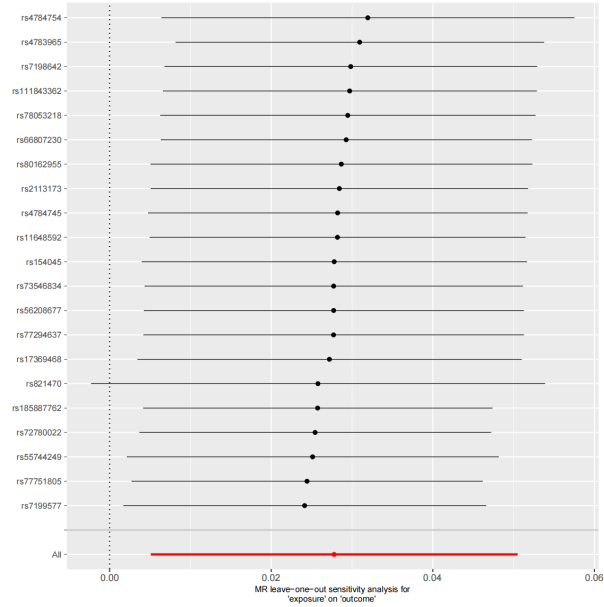


c

d


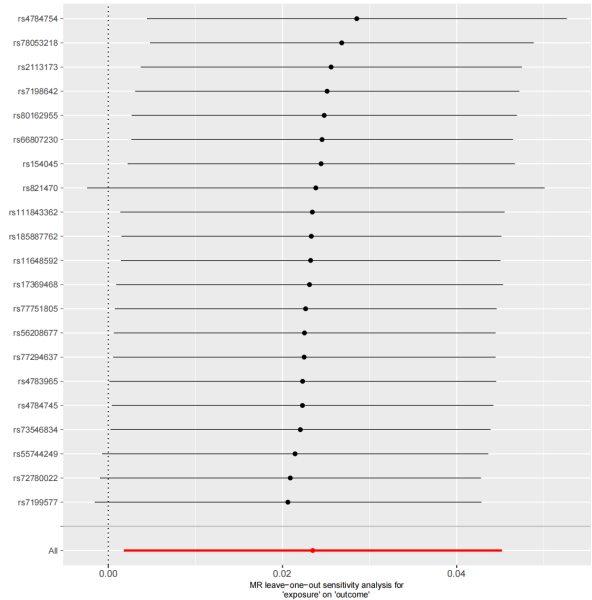

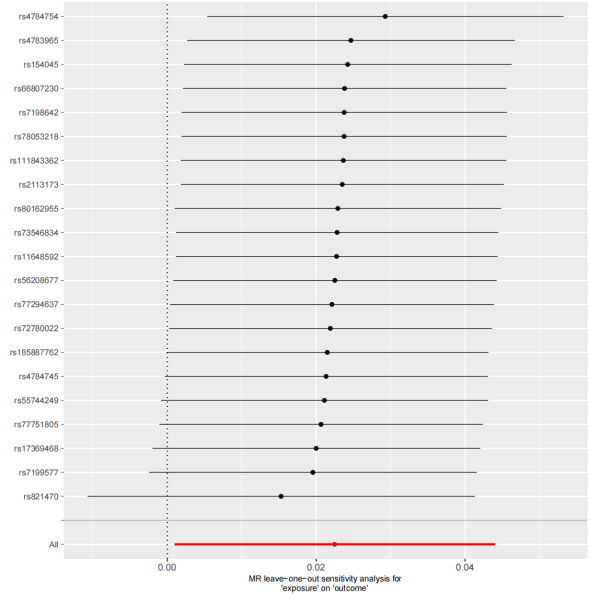


e

f


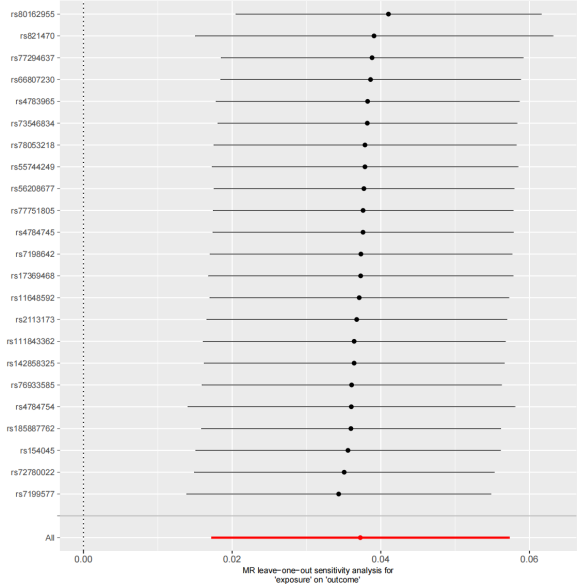

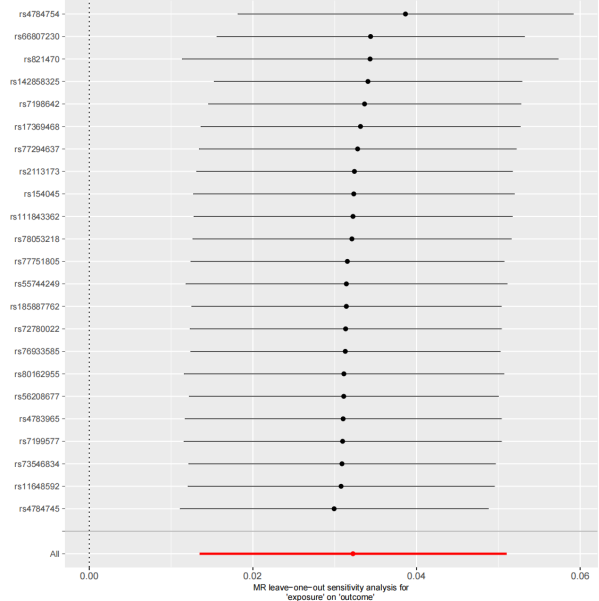


g

h


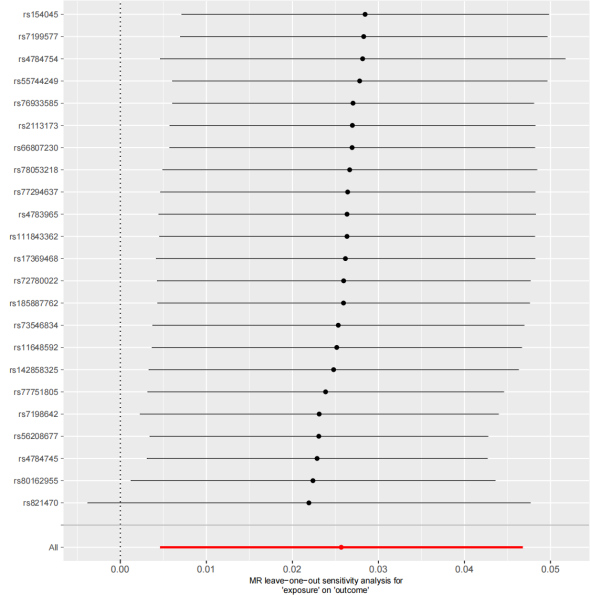

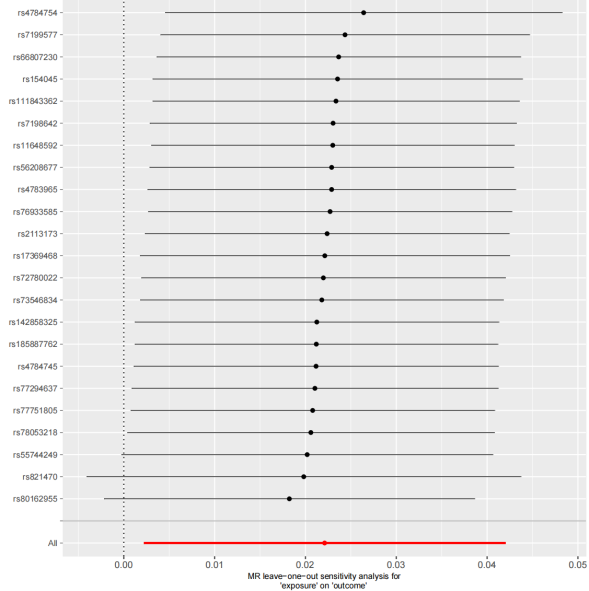


**Fig S3. Leave-one-out sensitivity analyses of NLRC5 eQTL effects on pQTLs across cohorts.**

(a–d) Leave-one-out analysis for the causal effects of NLRC5 eQTL on pQTLs of GABARAP, BRSK2, TNFSF12, and BCL2 in the deCODE Iceland cohort. Each panel displays the inverse-variance weighted (IVW) estimate (solid horizontal line) with 95% confidence intervals (shaded area) after iteratively excluding individual single nucleotide polymorphisms (SNPs). The vertical dashed line represents the null effect (β = 0).

(e–h) Corresponding leave-one-out analysis for NLRC5 eQTL effects on pQTLs of GABARAP, BRSK2, TNFSF12, and BCL2 in the UKB-PPP cohort.

a

b


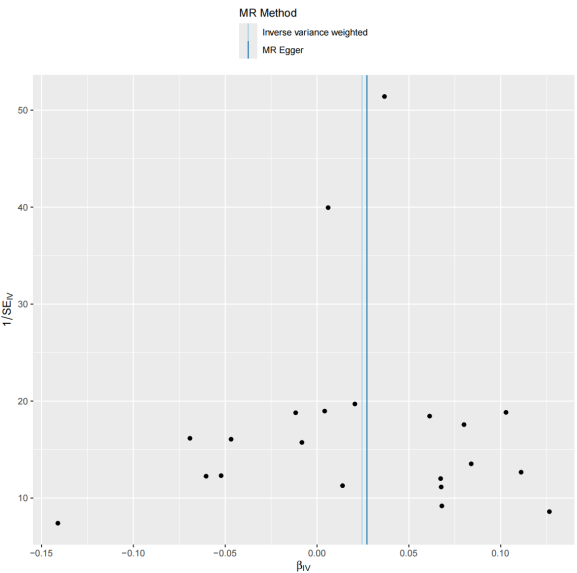

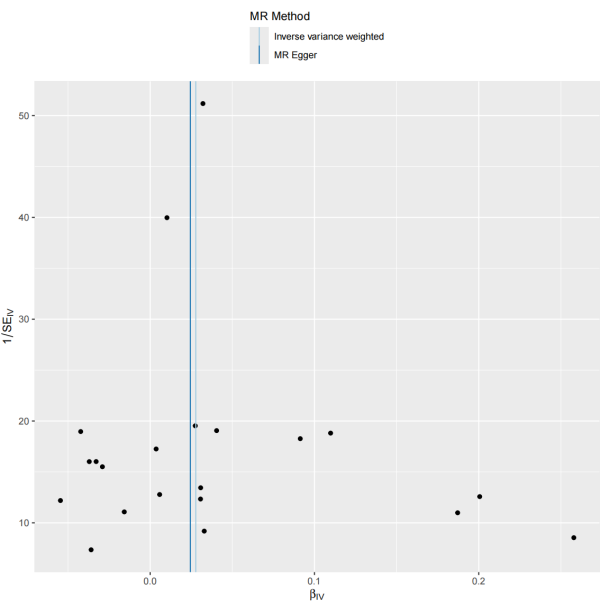


c

d


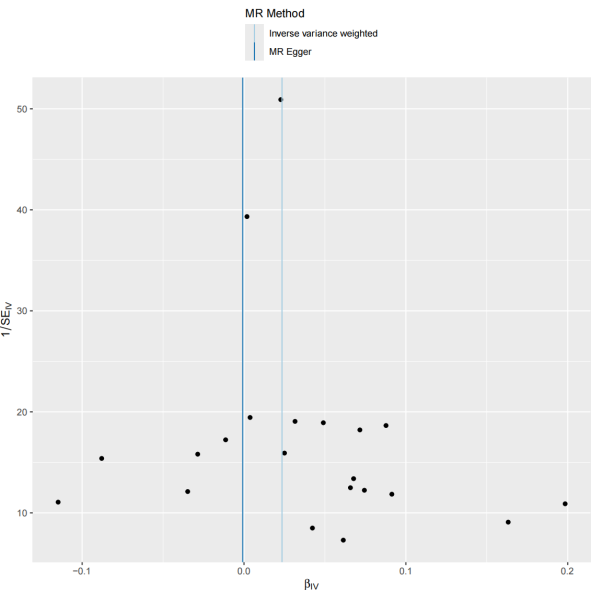

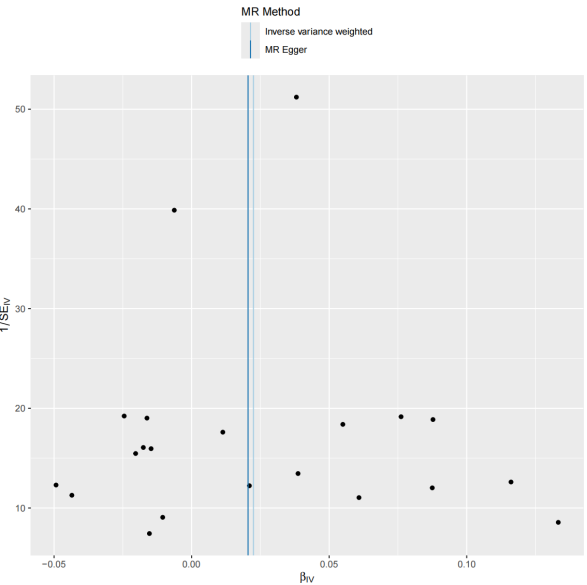


e

f


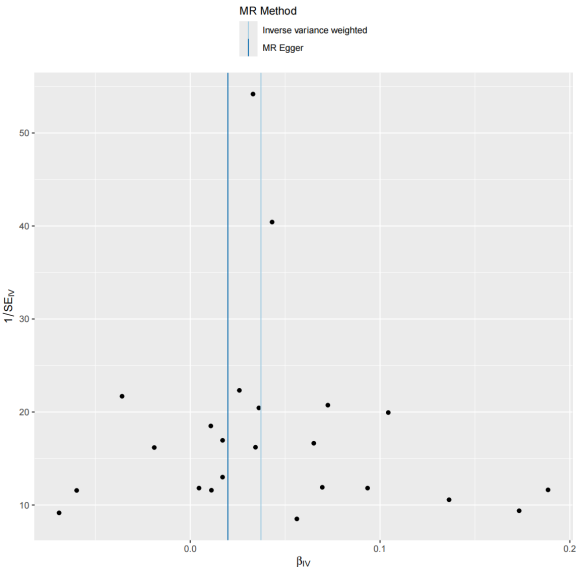

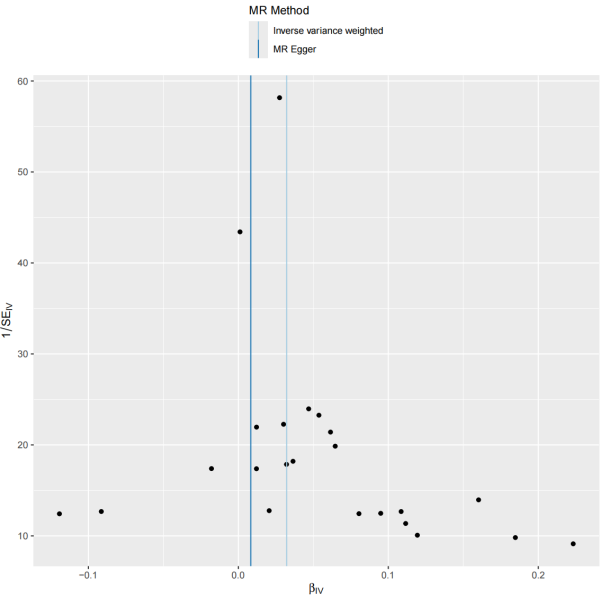


g

h


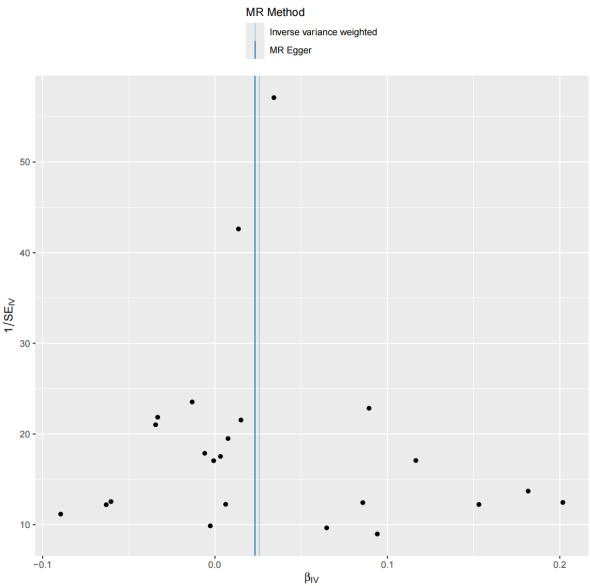

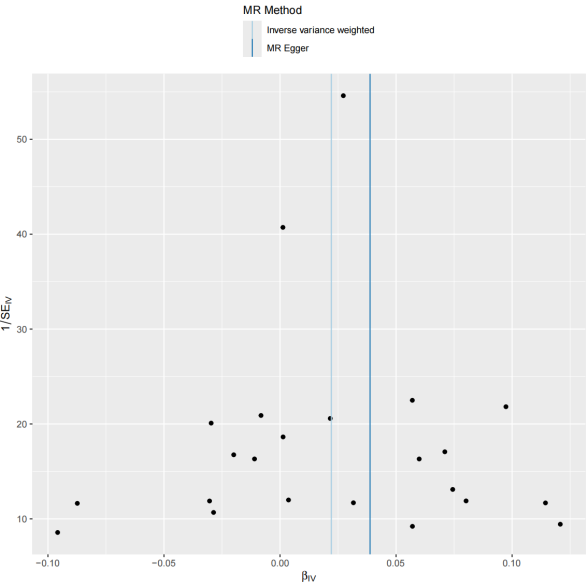


**Fig S4. Funnel plots assessing directional pleiotropy of NLRC5 expression quantitative trait loci (eQTL)-associated SNPs across cohorts.**

(a–d) Funnel plots of SNP-specific causal effect estimates (β) against precision (1/SE) for NLRC5 eQTL effects on GABARAP, BRSK2, TNFSF12, and BCL2 pQTLs in the deCODE Iceland cohort. Asymmetry was evaluated via MR-Egger regression intercept tests (reported in lower-left corners). The solid vertical line indicates inverse-variance weighted (IVW) pooled estimates, with dashed lines representing 95% confidence intervals.

(e–h) Corresponding funnel plots for NLRC5 eQTL effects on GABARAP, BRSK2, TNFSF12, and BCL2 pQTLs in the UK Biobank Pharma Proteomics Project (UKB-PPP).


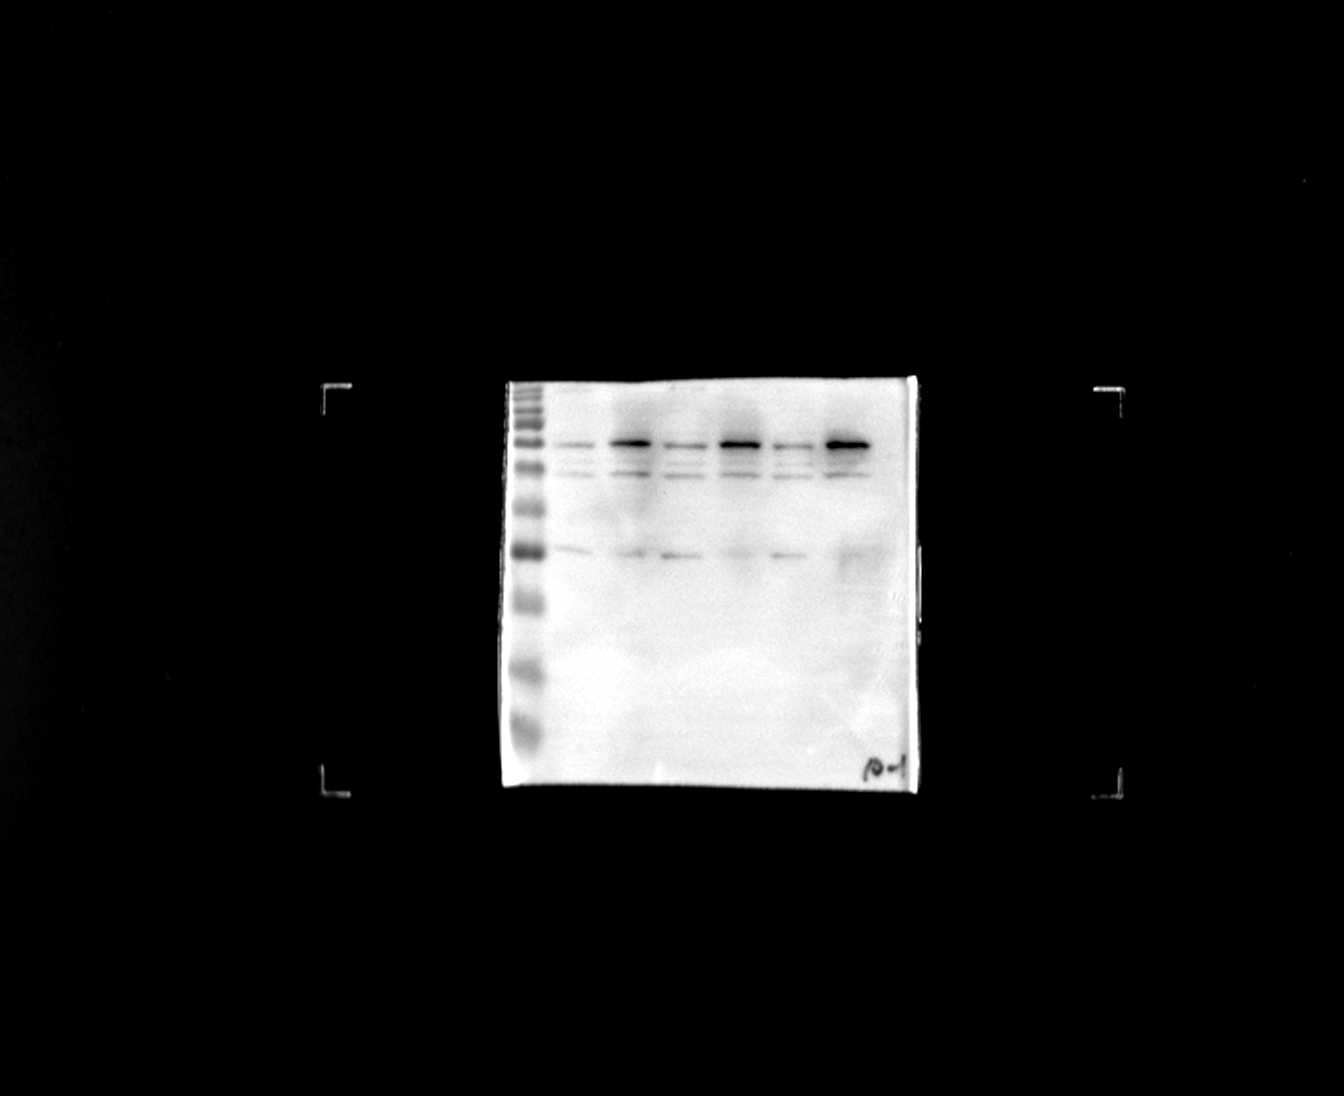

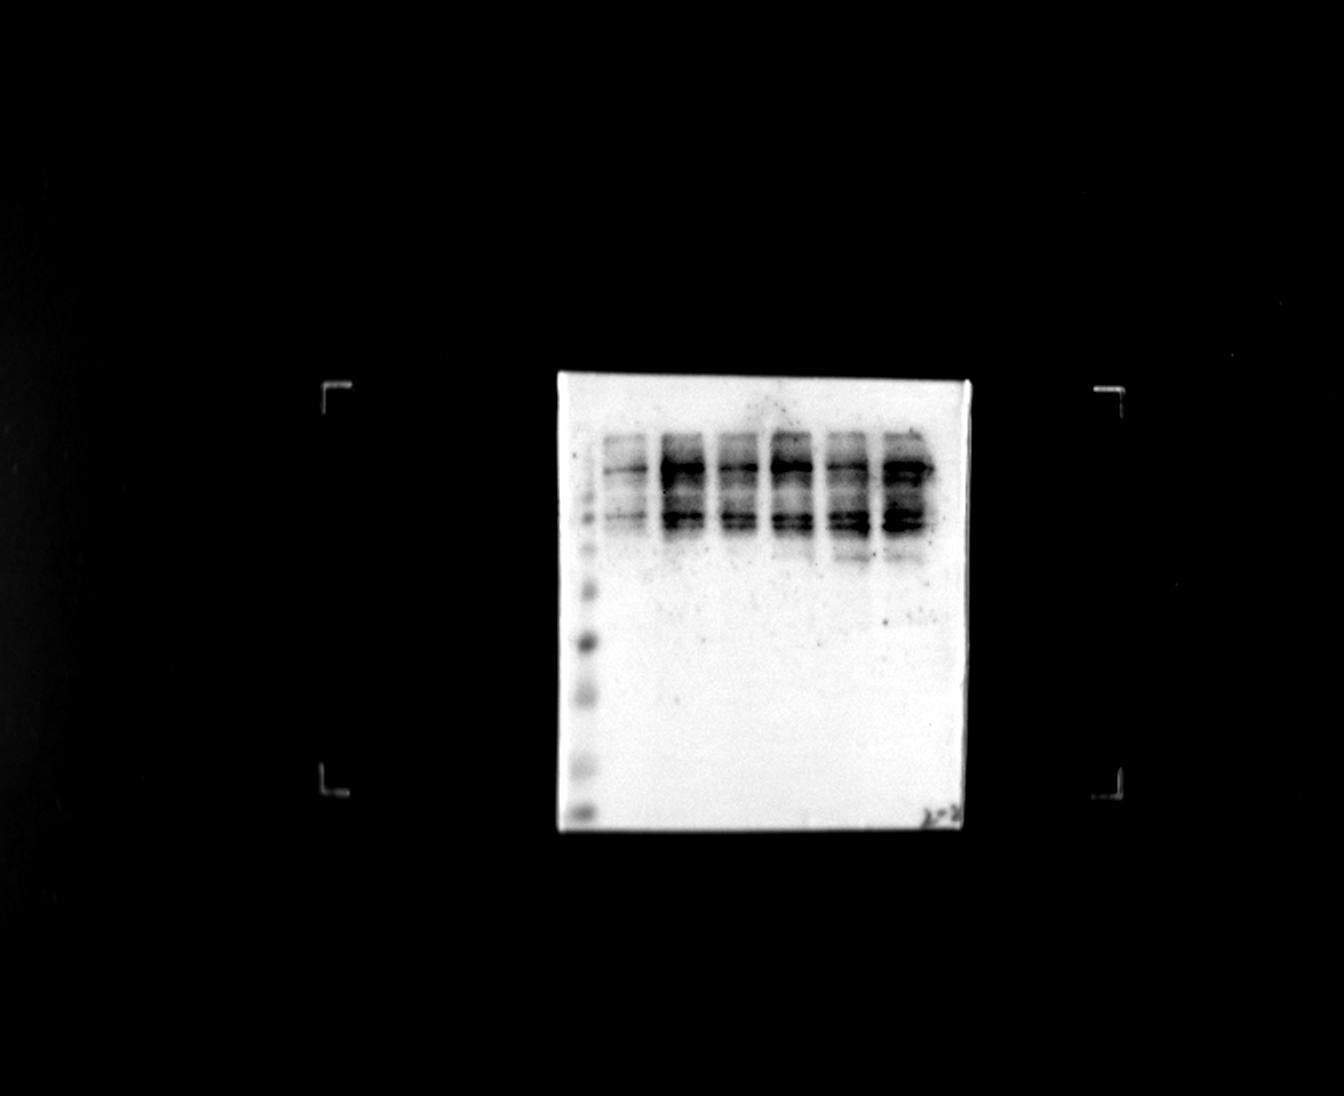


b

a

ZBP1

68kDa

Control EAE Control EAE Control EAE

NLRC5

154kDa

Control EAE Control EAE Control EAE

d

c


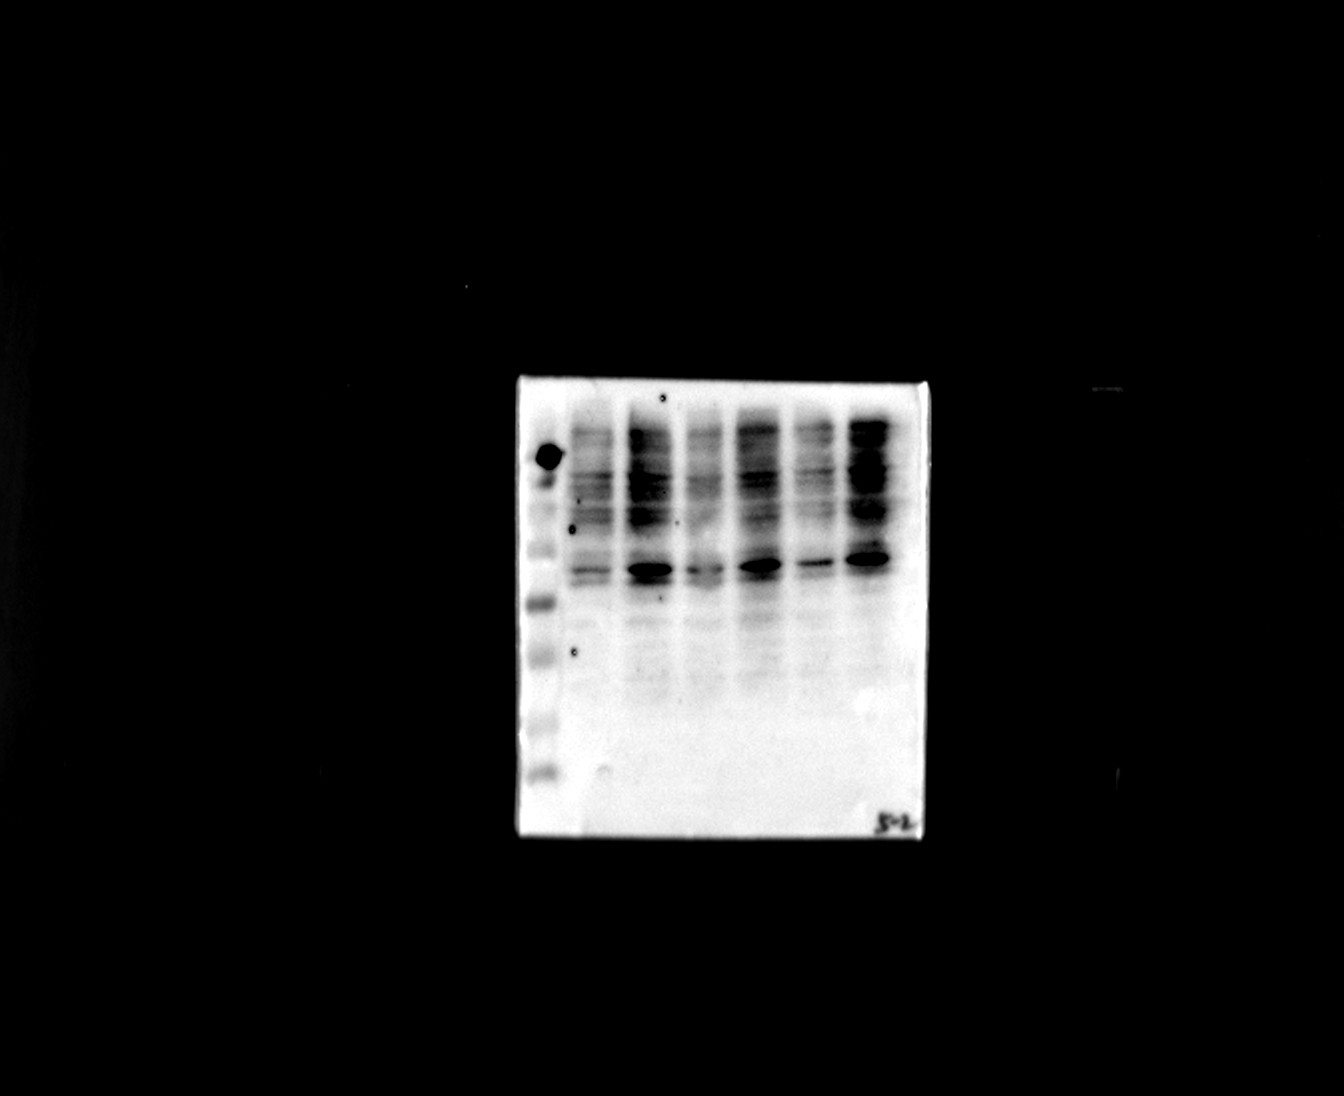


Control EAE Control EAE Control EAE


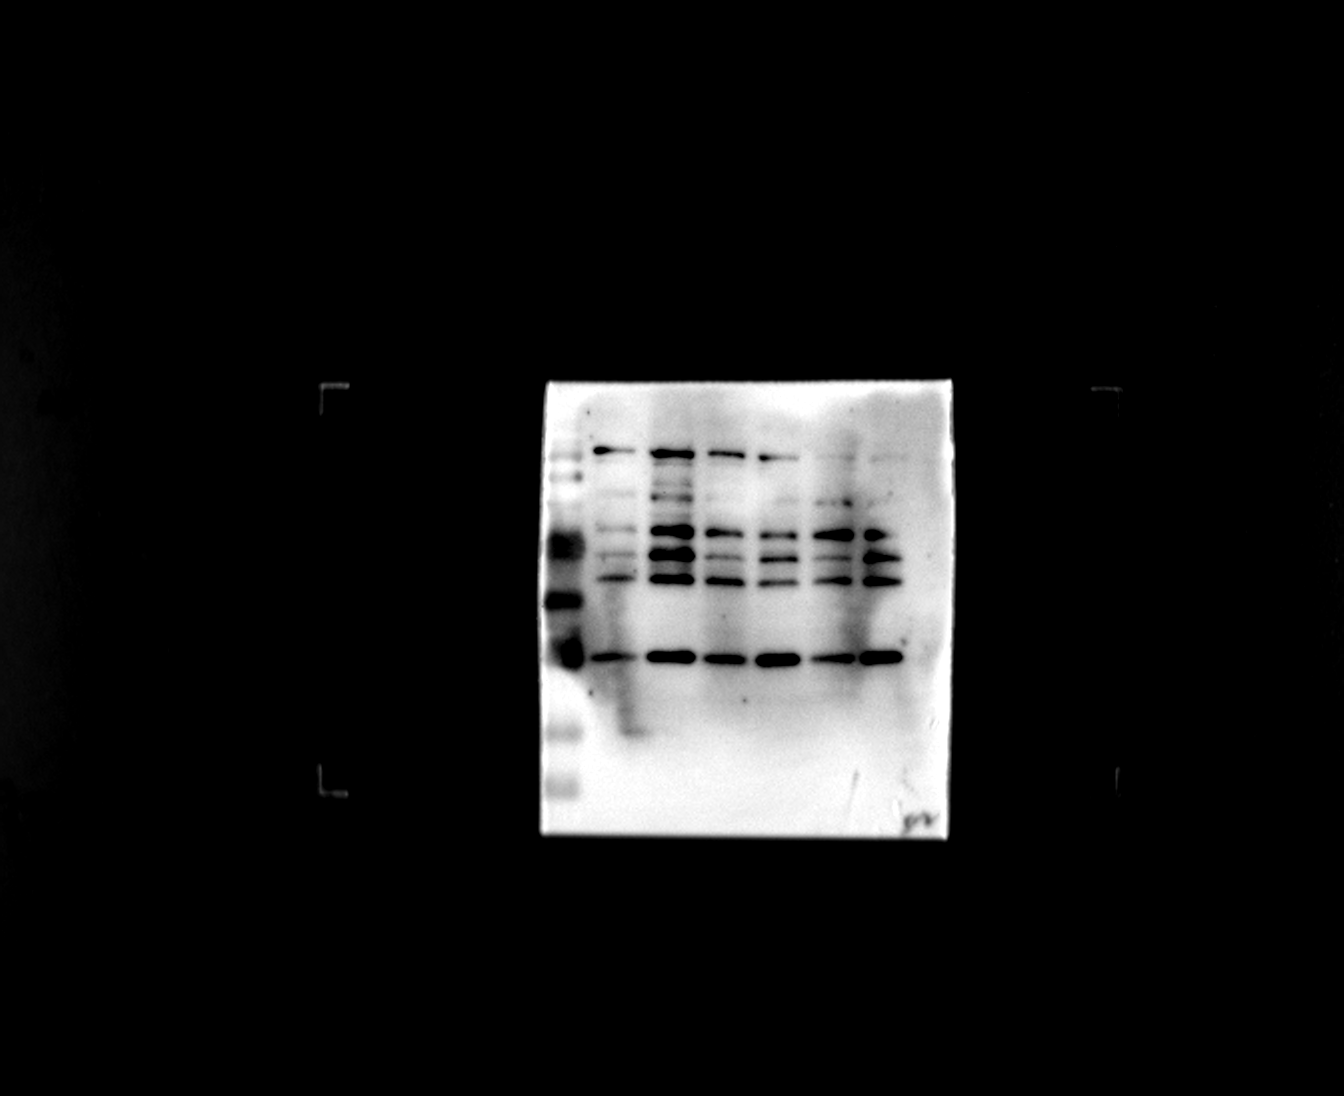


Control EAE Control EAE Control EAE

caspase-8

57kDa

ASC

23kDa

f

e


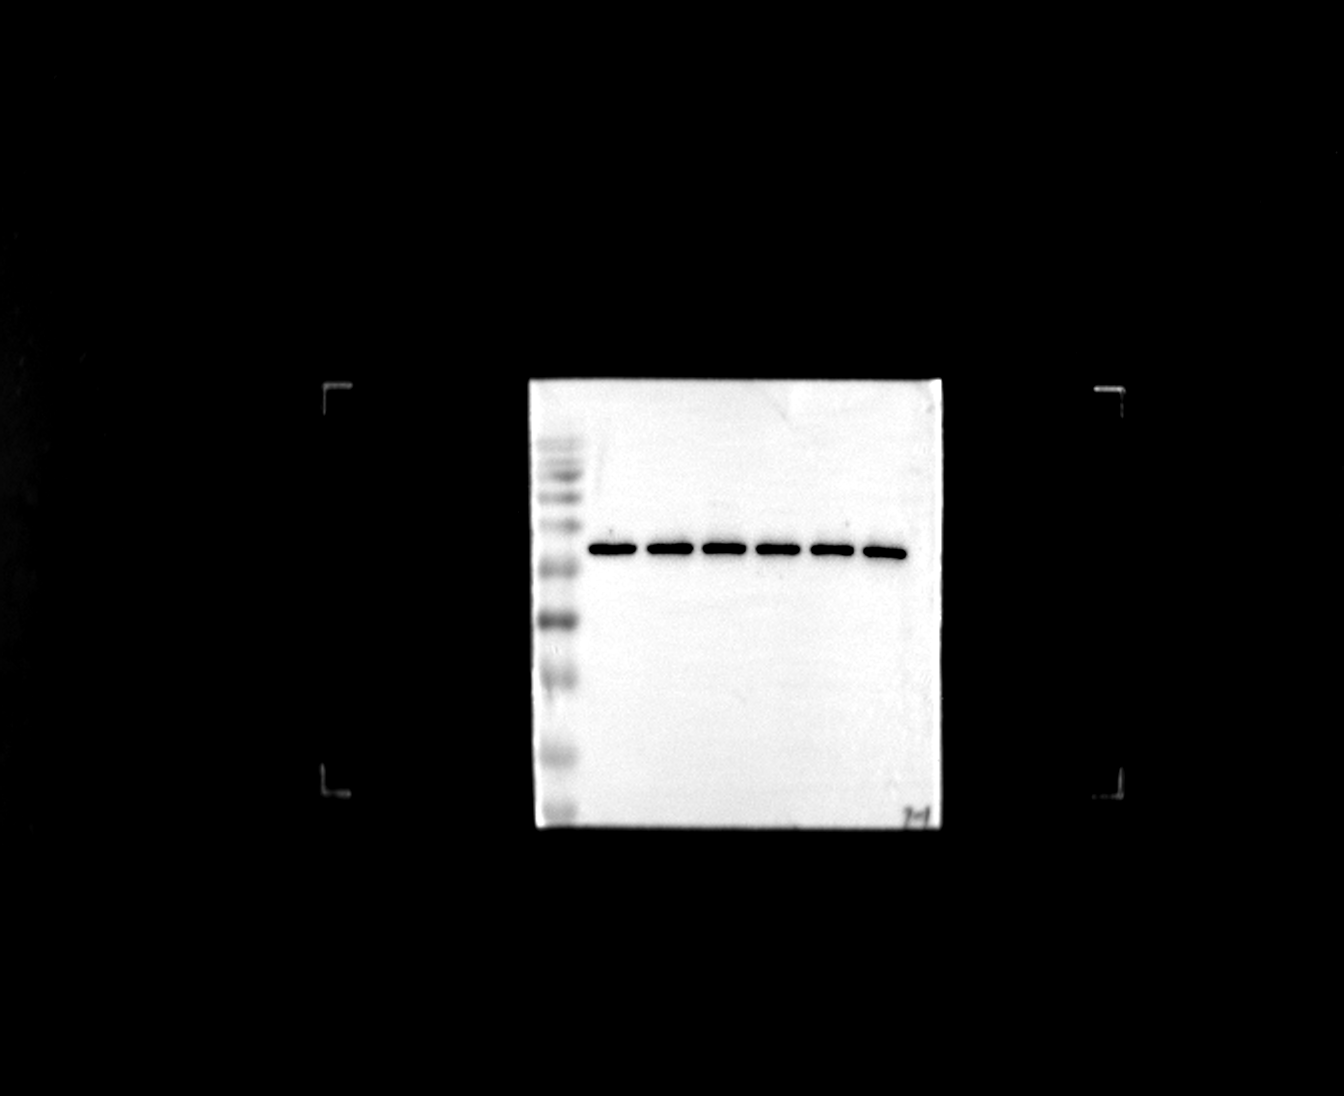

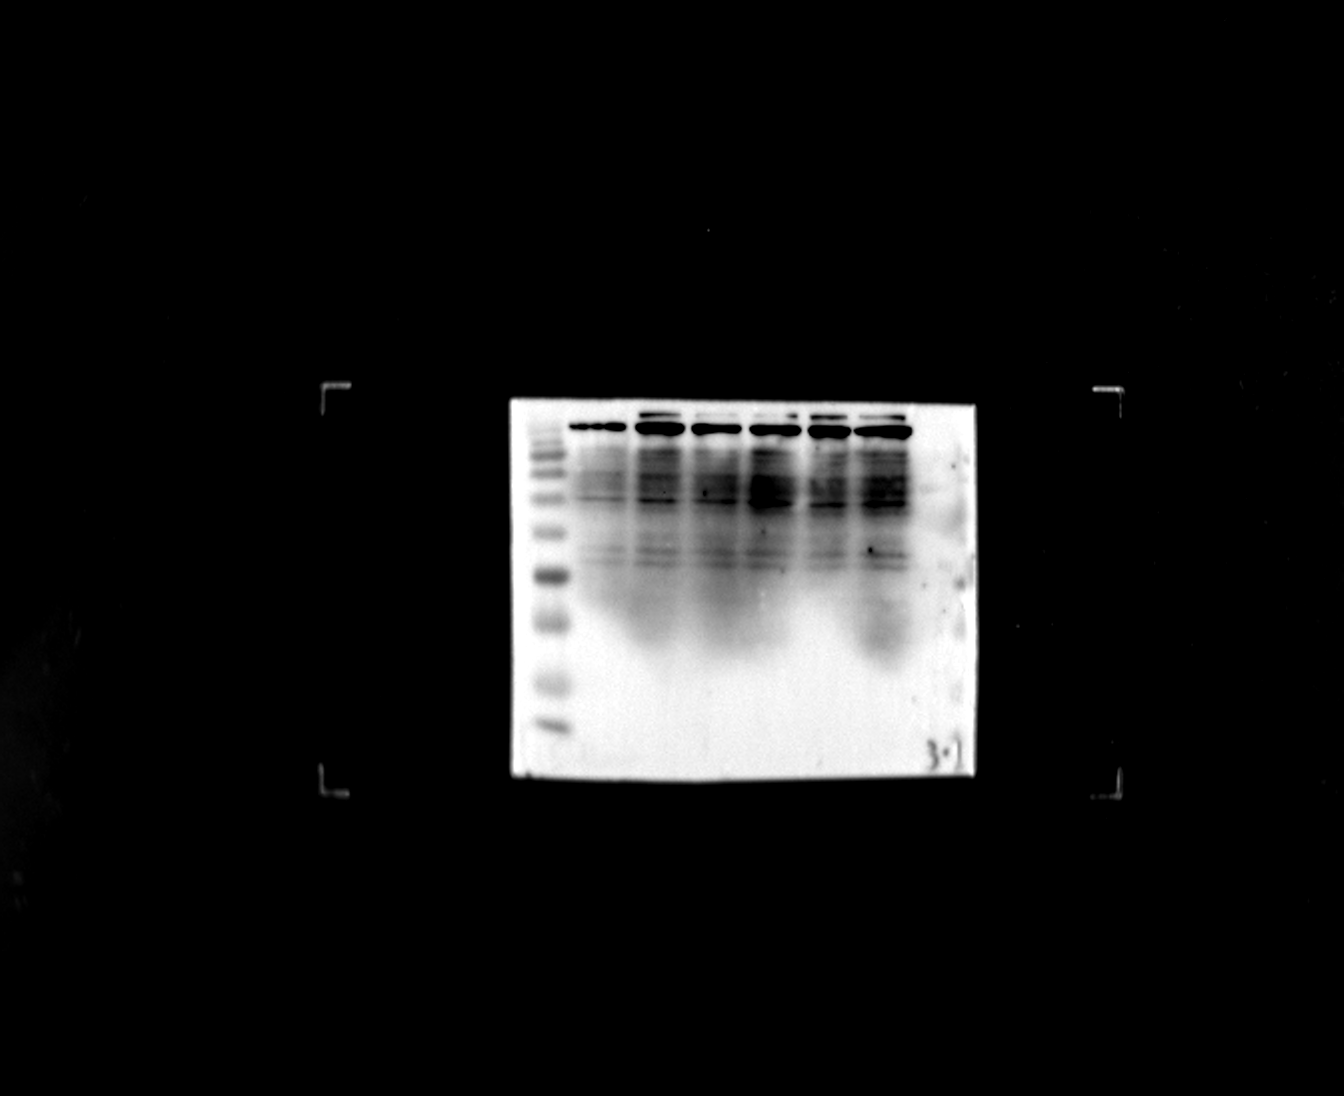


Control EAE Control EAE Control EAE

Control EAE Control EAE Control EAE

RIPK3

57kDa

β-actin

42kDa

**Fig S5: Original Western blot images (uncropped and unprocessed) . (a) NLRC5, (b) ZBP1, (c) caspase-8, (d) ASC, (e) RIPK3, (f) β-actin**
