# Supplementary material for: NLRC5-Mediated Epigenetic and Proteomic Regulation of Microglial Panoptosis Drives Neuroinflammation in Multiple Sclerosis
Source: Research Square preprint supplement (doi:10.21203/rs.3.rs-6759227/v1), 2025-06-26
Supplement: Supplementary file 14 [file be9b10985247a07f17555830.xlsx]

## Sheet: NLRC5
SNP	eaf	chr	pos	A1	A2	gene	p	n	beta	se
rs111843362	0.053725	16	57139069	T	C	NLRC5	1.6524e-26	13100	-0.291946	0.0274001
rs11648592	0.0228165	16	57083232	A	G	NLRC5	2.0515e-08	13544	0.228188	0.0406911
rs142858325	0.0697144	16	57043502	G	T	NLRC5	1.4422e-16	13100	-0.200407	0.0242594
rs154045	0.380079	16	57114924	A	G	NLRC5	2.1875e-39	14258	-0.160195	0.0121997
rs17369468	0.311611	16	57027765	T	A	NLRC5	1.3337e-38	13925	0.168109	0.0129379
rs185887762	0.0236749	16	57547558	C	T	NLRC5	3.2366e-10	8906	0.309851	0.0492836
rs2113173	0.236964	16	57345733	T	C	NLRC5	8.9605e-15	14256	-0.107981	0.0139275
rs4783965	0.239135	16	57045280	A	G	NLRC5	3.323e-31	13925	-0.163213	0.0140479
rs4784745	0.333102	16	57014875	G	A	NLRC5	1.2318e-16	14263	0.104016	0.0125621
rs4784754	0.207186	16	57071963	C	T	NLRC5	3.2667e-150	14263	-0.381348	0.0146088
rs55744249	0.13448	16	57046423	T	C	NLRC5	4.6217e-48	14258	-0.252828	0.0173575
rs56208677	0.0684235	16	57010232	T	C	NLRC5	1.5515e-11	11496	-0.176135	0.0261216
rs66807230	0.0356929	16	57112289	T	C	NLRC5	5.8078e-09	11496	-0.206963	0.0355478
rs7198642	0.192754	16	57032461	G	T	NLRC5	1.1957e-24	14263	-0.153832	0.0150098
rs7199577	0.354661	16	57082766	T	C	NLRC5	1.6227e-37	14263	-0.158421	0.012376
rs7200295	0.467324	16	57138074	G	C	NLRC5	2.0654e-10	14249	0.0754693	0.0118728
rs72780022	0.0844559	16	57087095	T	G	NLRC5	1.2332e-12	14263	0.15121	0.0212924
rs73546834	0.0613985	16	57069507	G	A	NLRC5	7.1825e-09	14255	-0.142755	0.0246707
rs76933585	0.0141054	16	57046069	G	T	NLRC5	2.8242e-08	8539	0.360279	0.0648893
rs77294637	0.0452697	16	57069011	A	G	NLRC5	2.8646e-24	14263	0.289476	0.0284797
rs77751805	0.0322918	16	56992420	A	G	NLRC5	1.019e-09	10333	0.2403	0.0393508
rs78053218	0.0327544	16	57077131	C	G	NLRC5	2.3181e-35	14262	0.412812	0.0332653
rs80162955	0.0193724	16	57071555	A	G	NLRC5	1.0534e-28	13348	0.493598	0.0444051
rs821470	0.354241	16	57058582	G	A	NLRC5	2.1006e-271	14263	0.435734	0.0123793
