# Supplementary material for: NLRC5-Mediated Epigenetic and Proteomic Regulation of Microglial Panoptosis Drives Neuroinflammation in Multiple Sclerosis
Source: Research Square preprint supplement (doi:10.21203/rs.3.rs-6759227/v1), 2025-06-26
Supplement: Supplementary file 15 [file c56e763f58b269cfb5e1f4ab.xlsx]

## Sheet: Sheet1
id
A1BG
A1CF
A2M
A2ML1
A4GALT
A4GNT
AAGAB
AARS
AASDHPPT
ABCC6
ABHD10
ABHD12
ABHD14A
ABHD14B
ABL1
ABL2
ABL2
ABLIM3
ABO
ACAA1
ACAD8
ACADL
ACADM
ACADS
ACADSB
ACADVL
ACAN
ACAP2
ACAT1
ACAT2
ACBD6
ACBD6
ACBD7
ACE
ACE2
ACHE
ACLY
ACOT13
ACOT8
ACP1
ACP2
ACP5
ACP6
ACPL2
ACPP
ACRV1
ACRV1
ACSF2
ACTN1
ACTN2
ACVR1B
ACVR2A
ACVR2B
ACVRL1
ACY1
ACYP2
ADAM10
ADAM10
ADAM11
ADAM12
ADAM15
ADAM15
ADAM17
ADAM17
ADAM19
ADAM22
ADAM23
ADAM29
ADAM30
ADAM32
ADAM7
ADAM9
ADAMDEC1
ADAMTS1
ADAMTS13
ADAMTS15
ADAMTS3
ADAMTS4
ADAMTS5
ADAMTS6
ADAMTSL1
ADAMTSL2
ADCK4
ADCYAP1
ADCYAP1
ADCYAP1
ADGRE2
ADGRF1
ADGRF5
ADGRG5
ADH1A
ADH1B
ADH1C
ADH4
ADH5
ADH6
ADH7
ADI1
ADIPOQ
ADK
ADM
ADM
ADM2
ADPGK
ADPRH
ADPRHL2
ADRBK1
ADRM1
ADSL
ADSS
ADSSL1
AES
AFAP1L1
AFM
AFP
AGA
AGAP2
AGAP3
AGER
AGFG1
AGGF1
AGO1
AGO3
AGR2
AGR3
AGRN
AGRP
AGT
AHCYL1
AHSA1
AHSG
AHSP
AIDA
AIF1
AIF1L
AIFM1
AIMP1
AIP
AK1
AK2
AK4
AK5
AKAP7
AKR1A1
AKR1B1
AKR1B10
AKR1C1
AKR1C3
AKR1C4
AKR1D1
AKR7A2
AKR7A3
AKT1
AKT2
AKT2
ALAD
ALB
ALCAM
ALDH1A1
ALDH1A3
ALDH2
ALDH3A1
ALDH3B1
ALDH5A1
ALDH6A1
ALDOA
ALDOB
ALDOC
ALK
ALKBH2
ALKBH3
ALOX15B
ALPI
ALPL
ALPPL2
ALPPL2
AMBP
AMH
AMICA1
AMIGO1
AMIGO2
AMMECR1L
AMN
AMPD2
AMY1A
AMY2A
AMY2B
ANAPC10
ANAPC7
ANG
ANGPT1
ANGPT2
ANGPT4
ANGPTL1
ANGPTL1
ANGPTL3
ANGPTL4
ANGPTL7
ANK2
ANKRD1
ANKRD27
ANKRD46
ANKRD54
ANP32A
ANP32B
ANPEP
ANTXR1
ANTXR2
ANXA1
ANXA10
ANXA11
ANXA13
ANXA2
ANXA2
ANXA3
ANXA4
ANXA5
ANXA6
ANXA7
ANXA7
ANXA8
ANXA9
AOC1
AOC2
AP1G2
AP1S2
AP2A2
AP4M1
APAF1
APBB1
APBB1
APBB2
APBB2
APBB3
APBB3
APCDD1
APCS
APEX1
APLN
APLP1
APLP2
APMAP
APOA1
APOA1BP
APOA2
APOA4
APOA5
APOB
APOBEC3G
APOC1
APOC2
APOC3
APOD
APOE
APOF
APOH
APOL1
APOL1
APOL3
APOM
APP
APPL1
APRT
APTX
AQP4
ARAF
AREG
ARF1
ARF3
ARF4
ARF5
ARF6
ARFGAP1
ARFGAP2
ARFIP1
ARFIP2
ARG1
ARG2
ARHGAP1
ARHGAP1
ARHGAP25
ARHGAP30
ARHGAP36
ARHGAP5
ARHGDIA
ARHGDIB
ARHGEF1
ARHGEF10
ARHGEF2
ARHGEF25
ARHGEF7
ARID1A
ARID3A
ARL1
ARL11
ARL14
ARL15
ARL2
ARL2BP
ARL3
ARL4D
ARL5A
ARL5B
ARL6
ARL6IP5
ARL8B
ARL9
ARMC10
ARMC5
ARPC1B
ARPC3
ARPC5
ARPP19
ARPP21
ARRB1
ARRDC3
ARSA
ARSB
ARSK
ART3
ART4
ARTN
AS3MT
ASAH1
ASAH2
ASAP2
ASB9
ASCC1
ASF1A
ASGR1
ASGR2
ASH1L
ASH2L
ASIC4
ASIP
ASL
ASMTL
ASNA1
ASPA
ASPH
ASPN
ASPRV1
ASRGL1
ASTL
ATAD1
ATAD2
ATF6
ATF6B
ATG3
ATG4B
ATG5
ATG7
ATOX1
ATP13A1
ATP1B1
ATP1B2
ATP1B3
ATP1B4
ATP2A3
ATP4B
ATP5B
ATP5J
ATP5J2
ATP5O
ATRN
ATXN3
AURKA
AURKB
AXIN2
AXIN2
AXL
AZGP1
AZU1
B2M
B3GALT1
B3GALT2
B3GALT6
B3GALTL
B3GAT3
B3GNT2
B3GNT4
B3GNT6
B3GNT8
B4GALNT1
B4GALT1
B4GALT2
B4GALT3
B4GALT5
B4GALT6
B4GALT7
BACH1
BACH2
BAD
BAG1
BAG2
BAG3
BAG4
BAG5
BAGE2
BAGE3
BAI3
BAIAP2
BAMBI
BARD1
BATF
BATF3
BCAM
BCAN
BCAP29
BCAR3
BCAR3
BCAT2
BCCIP
BCHE
BCL10
BCL2
BCL2A1
BCL2L1
BCL2L10
BCL2L11
BCL2L2
BCL6
BDH2
BDNF
BDNF
BDP1
BECN1
BET1L
BGLAP
BGN
BHMT2
BID
BIN1
BIRC2
BIRC3
BIRC5
BIRC7
BIRC7
BLK
BLMH
BLNK
BLVRA
BLVRB
BMP1
BMP10
BMP15
BMP2
BMP3
BMP4
BMP4
BMP6
BMP7
BMP8B
BMPER
BMPR1B
BMPR2
BMX
BNIP3
BNIP3L
BOC
BOLA1
BOLA2
BOLA3
BPGM
BPHL
BPI
BPIFA1
BPIFA2
BPIFB1
BPNT1
BPTF
BRAF
BRAT1
BRD1
BRD2
BRD2
BRD4
BRDT
BRF1
BRICD5
BRPF1
BRSK2
BSG
BST1
BST2
BTC
BTD
BTG2
BTK
BTLA
BTN2A1
BTN3A1
BTN3A3
BTNL3
BTNL8
BTNL9
BUB1
C10orf105
C10orf35
C10orf54
C10orf54
C11orf68
C11orf73
C11orf87
C11orf94
C12orf10
C14orf93
C16orf54
C17orf67
C17orf78
C17orf89
C18orf32
C19orf18
C19orf80
C1D
C1GALT1C1
C1orf115
C1orf162
C1orf185
C1orf186
C1orf198
C1orf210
C1orf226
C1orf43
C1QBP
C1QC
C1QL1
C1QL2
C1QL4
C1QTNF1
C1QTNF3
C1QTNF5
C1QTNF9
C1R
C1RL
C1S
C2
C20orf173
C21orf33
C22orf15
C2orf40
C2orf66
C3
C3
C3
C3
C3
C3orf18
C4BPA
C4BPB
C4orf32
C5
C5
C5orf38
C5orf46
C5orf63
C6
C6orf89
C7
C7orf69
C7orf73
C8G
C9
C9orf89
CA1
CA10
CA11
CA12
CA13
CA2
CA3
CA4
CA5A
CA5B
CA6
CA7
CA8
CA9
CAB39
CABLES2
CABP7
CACNA2D3
CACNB4
CACYBP
CADM1
CADM2
CADM3
CALB1
CALB2
CALCB
CALCOCO2
CALN1
CALR
CALY
CAMK1
CAMK1D
CAMK2A
CAMK2B
CAMK2D
CAMK4
CAMKK1
CAMP
CAMP
CAND1
CANT1
CANX
CAP1
CAPG
CAPN2
CAPN3
CAPNS1
CAPSL
CAPZA1
CARD17
CARD18
CARD9
CARHSP1
CARS
CARTPT
CASC4
CASC4
CASK
CASP10
CASP14
CASP2
CASP3
CASP8
CASQ1
CASQ2
CASS4
CAST
CAT
CAV2
CAV3
CBFB
CBL
CBLN1
CBLN4
CBR1
CBR3
CBS
CBX1
CBX3
CBX5
CBX7
CCBL1
CCBL2
CCDC101
CCDC126
CCDC134
CCDC167
CCDC25
CCDC50
CCDC51
CCDC64
CCDC80
CCDC90B
CCK
CCL1
CCL11
CCL13
CCL14
CCL15
CCL16
CCL17
CCL18
CCL19
CCL2
CCL20
CCL21
CCL22
CCL23
CCL23
CCL24
CCL25
CCL26
CCL27
CCL28
CCL3
CCL3L1
CCL4L1
CCL5
CCL7
CCL8
CCM2
CCNA1
CCNA2
CCNB1
CCNB1IP1
CCNB2
CCNH
CCPG1
CCS
CCT5
CCT7
CCT8
CD109
CD14
CD14
CD160
CD163
CD164L2
CD177
CD1A
CD1D
CD2
CD200
CD200R1
CD200R1L
CD207
CD209
CD226
CD244
CD247
CD248
CD27
CD274
CD300A
CD300C
CD300E
CD300LB
CD300LF
CD320
CD33
CD36
CD37
CD38
CD3E
CD3E
CD3G
CD4
CD40LG
CD44
CD46
CD47
CD48
CD5
CD5
CD55
CD58
CD59
CD5L
CD63
CD68
CD69
CD7
CD70
CD72
CD74
CD74
CD79A
CD79A
CD79B
CD80
CD81
CD83
CD86
CD8A
CD8B
CD9
CD93
CD96
CD97
CD99L2
CDC2
CDC25A
CDC25B
CDC34
CDC37
CDC42
CDC42BPA
CDC42BPB
CDCP1
CDCP1
CDH1
CDH11
CDH11
CDH12
CDH15
CDH15
CDH17
CDH2
CDH3
CDH5
CDH6
CDH7
CDH8
CDHR1
CDHR3
CDHR5
CDK2AP1
CDK2AP2
CDKN1A
CDKN1B
CDKN2B
CDKN2C
CDKN2D
CDKN3
CDNF
CDON
CDSN
CDY1
CDYL2
CEACAM19
CEACAM20
CEACAM21
CEACAM3
CEACAM4
CEACAM7
CEACAM8
CEBPA
CEBPB
CEBPG
CECR1
CEL
CELA1
CELA2A
CELA3B
CELF2
CENPV
CENPW
CER1
CERS5
CES1
CETN2
CETN3
CFAP45
CFB
CFC1
CFD
CFH
CFHR1
CFHR2
CFHR3
CFHR4
CFHR5
CFI
CFL1
CFL2
CFLAR
CFP
CFTR
CGA
CGB2
CGREF1
CHAD
CHCHD10
CHD7
CHEK1
CHEK2
CHFR
CHGA
CHGB
CHI3L1
CHI3L2
CHIA
CHIT1
CHKB
CHL1
CHMP2A
CHMP2B
CHP1
CHRD
CHRDL1
CHRDL2
CHST1
CHST11
CHST12
CHST14
CHST15
CHST2
CHST3
CHST4
CHST5
CHST6
CHST9
CILP
CILP2
CINP
CIRBP
CISD1
CISD2
CKAP2
CKAP4
CKB
CKMT1A
CKMT2
CKS1B
CLC
CLCA1
CLCA2
CLCNKB
CLEC10A
CLEC11A
CLEC11A
CLEC12A
CLEC1B
CLEC2A
CLEC2B
CLEC2D
CLEC2L
CLEC3B
CLEC4A
CLEC4C
CLEC4D
CLEC4G
CLEC4M
CLEC6A
CLEC7A
CLGN
CLIC1
CLIC2
CLIC4
CLIC5
CLINT1
CLK2
CLMP
CLMP
CLN5
CLPP
CLPS
CLPSL1
CLPSL2
CLSTN1
CLSTN2
CLSTN3
CLTA
CLTC
CLU
CMA1
CMBL
CMPK1
CNDP1
CNDP2
CNEP1R1
CNGA2
CNN1
CNN2
CNOT1
CNP
CNPY3
CNPY4
CNRIP1
CNTF
CNTFR
CNTN1
CNTN2
CNTN4
CNTN5
CNTNAP2
CNTNAP5
COA3
COCH
COG8
COL10A1
COL11A2
COL13A1
COL15A1
COL18A1
COL1A1
COL1A1
COL20A1
COL23A1
COL25A1
COL28A1
COL2A1
COL2A1
COL3A1
COL4A3BP
COL4A3BP
COL6A1
COL6A2
COL6A3
COL6A3
COL6A5
COL8A1
COL9A1
COL9A1
COLEC10
COLEC11
COLEC12
COLGALT1
COLGALT2
COMMD1
COMMD7
COMMD9
COMP
COMT
COPE
COPS2
COPS7B
COTL1
COX4I2
COX5A
COX5B
COX6A2
COX6C
COX7A1
COX7A2L
CP
CPA2
CPA4
CPB1
CPB2
CPD
CPE
CPLX1
CPLX2
CPM
CPN1
CPN2
CPNE1
CPOX
CPQ
CPT1B
CPVL
CPXM1
CPZ
CR1
CR2
CRABP1
CRABP2
CRADD
CRAT
CRCP
CREB3L1
CREB3L2
CREB3L4
CREBBP
CREG1
CRELD1
CRH
CRH
CRHBP
CRIM1
CRIM1
CRIP1
CRIP2
CRIPT
CRISP2
CRISP3
CRISPLD2
CRK
CRKL
CRLF1
CRLF2
CRMP1
CRNN
CROT
CRP
CRTAC1
CRTAM
CRYAA
CRYBB1
CRYBB2
CRYGD
CRYGS
CRYZ
CRYZL1
CS
CSAG1
CSDC2
CSDE1
CSF1
CSF1R
CSF2
CSF2RA
CSF2RB
CSF2RB
CSF3
CSF3R
CSGALNACT2
CSK
CSMD1
CSMD2
CSN2
CSNK1D
CSNK1G2
CSNK1G2
CSNK2A1
CSNK2A1
CSNK2A2
CSNK2B
CSPG4
CSRP1
CSRP2
CSRP3
CST1
CST2
CST3
CST4
CST5
CST6
CST7
CST8
CSTL1
CT55
CTBP1
CTCF
CTF1
CTGF
CTHRC1
CTLA4
CTNNA2
CTNNB1
CTNNB1
CTRB1
CTRB2
CTRC
CTRL
CTSA
CTSB
CTSC
CTSD
CTSE
CTSF
CTSG
CTSH
CTSK
CTSL
CTSO
CTSS
CTSV
CTSZ
CUBN
CUL1
CUL3
CUL4B
CUL9
CUTC
CUZD1
CX3CL1
CXADR
CXCL1
CXCL10
CXCL11
CXCL12
CXCL13
CXCL14
CXCL16
CXCL17
CXCL5
CXCL6
CXCL8
CXCL9
CXCL9
CYB561D1
CYB5A
CYB5D2
CYB5R1
CYB5R2
CYB5R3
CYCS
CYGB
CYP3A4
CYP3A4
CYR61
CYTH2
CYTH4
CYTIP
CYTL1
DAG1
DAO
DAP
DAPK1
DAPK2
DAPP1
DARS
DARS2
DBI
DBNL
DCAF5
DCBLD1
DCI
DCK
DCLK1
DCLK3
DCN
DCP1A
DCP1B
DCTD
DCTN2
DCTN6
DCTPP1
DCUN1D1
DCUN1D2
DCUN1D3
DCUN1D5
DCXR
DDAH1
DDC
DDIT3
DDIT4
DDOST
DDR1
DDR2
DDT
DDX19A
DDX19B
DDX23
DDX25
DDX39B
DDX46
DDX58
DDX6
DEAF1
DECR1
DECR2
DEF6
DEFA1
DEFA5
DEFB1
DEFB103A
DEFB104A
DEFB106A
DEFB107A
DEFB108B
DEFB110
DEFB112
DEFB113
DEFB115
DEFB116
DEFB118
DEFB119
DEFB121
DEFB125
DEFB128
DEFB129
DEFB132
DEFB135
DEFB136
DEFB4A
DENR
DEPP
DERL1
DES
DGCR14
DGCR2
DGCR6
DGKB
DHFR
DHH
DHPS
DHRS9
DHX38
DHX58
DHX8
DHX9
DIABLO
DIDO1
DIMT1
DIRAS1
DIRAS3
DIXDC1
DKK1
DKK2
DKK3
DKK4
DKKL1
DLD
DLG2
DLG3
DLG4
DLK1
DLK1
DLK2
DLL1
DLL3
DLL4
DLX3
DLX4
DMBT1
DMKN
DMKN
DNAI1
DNAJA2
DNAJA4
DNAJB1
DNAJB11
DNAJB12
DNAJB14
DNAJB2
DNAJB4
DNAJB6
DNAJB9
DNAJC10
DNAJC11
DNAJC15
DNAJC16
DNAJC17
DNAJC18
DNAJC19
DNAJC27
DNAJC30
DNAJC4
DNAJC4
DNASE1L2
DNASE2B
DNER
DNER
DNM2
DNMT3L
DOC2B
DOCK9
DOK1
DOK2
DOK2
DOS
DOT1L
DPEP1
DPEP2
DPP10
DPP4
DPP7
DPT
DPY30
DPYSL2
DPYSL3
DPYSL5
DRAXIN
DRG1
DRGX
DSC1
DSC2
DSC3
DSCAM
DSCAML1
DSG1
DSG2
DSG3
DSTN
DTD1
DTD2
DTX1
DTX3L
DTYMK
DUS2
DUSP13
DUSP15
DUSP16
DUSP23
DUSP26
DUSP28
DUSP3
DUSP4
DUSP6
DUT
DVL2
DYNLL1
DYNLL2
DYNLRB1
DYNLRB2
DYNLT1
DYNLT3
DYRK3
EBAG9
EBI3
ECE1
ECEL1
ECH1
ECHS1
ECI2
ECM1
EDA
EDA
EDA2R
EDAR
EDC4
EDDM3A
EDDM3B
EDF1
EDIL3
EDN1
EDN2
EDN3
EEA1
EEF1B2
EEF1D
EEF2K
EFCAB14
EFEMP1
EFHA1
EFHA2
EFHD1
EFNA2
EFNA3
EFNA4
EFNA5
EFNB1
EFNB2
EFNB2
EFNB3
EFNB3
EFS
EGF
EGFL6
EGFLAM
EGFR
EGFR
EGLN1
EHBP1
EHD4
EHF
EHMT2
EID3
EIF1AD
EIF1AX
EIF1AY
EIF1B
EIF2AK4
EIF2B1
EIF2S1
EIF3G
EIF3J
EIF4A1
EIF4A2
EIF4A3
EIF4B
EIF4E
EIF4E2
EIF4EBP1
EIF4EBP2
EIF4EBP3
EIF4G2
EIF4G3
EIF4H
EIF5
EIF5A
EIF5A2
ELANE
ELAVL1
ELF5
ELK1
ELK3
ELL
ELL2
ELMO1
EMC1
EMC4
EMC8
EMID1
EMILIN3
ENAH
ENDOU
ENG
ENGASE
ENO1
ENO2
ENO3
ENOX1
ENOX2
ENPEP
ENPP2
ENPP5
ENPP6
ENPP7
ENSA
ENTHD2
ENTPD1
ENTPD1
ENTPD2
ENTPD3
ENTPD5
ENTPD6
EPB41
EPB41L1
EPDR1
EPHA1
EPHA10
EPHA2
EPHA3
EPHA4
EPHA5
EPHA7
EPHB1
EPHB2
EPHB3
EPHB4
EPHB6
EPO
EPOR
EPS15L1
EPYC
EQTN
ERAP1
ERAP2
ERBB2
ERBB3
ERBB4
ERCC1
ERCC4
EREG
ERH
ERLEC1
ERLIN1
ERMAP
ERN1
ERO1L
ERO1LB
ERP27
ERP29
ERP44
ERVV
ESAM
ESD
ESM1
ESRP1
ESRRA
ETFA
ETHE1
ETNK1
ETS2
ETV5
EVA1B
EVA1C
EVL
EVPL
EWSR1
EXOSC1
EXOSC3
EXOSC8
EXTL2
EYS
EZR
F10
F10
F11
F13B
F2
F2
F3
F5
F7
F8
F9
F9
FAAH2
FABP1
FABP12
FABP2
FABP3
FABP4
FABP5
FABP6
FABP9
FADD
FAF2
FAH
FAHD1
FAIM
FAIM3
FAM107A
FAM134B
FAM150B
FAM151A
FAM159A
FAM162A
FAM162B
FAM163B
FAM171A1
FAM171A2
FAM171B
FAM171B
FAM172A
FAM173A
FAM174A
FAM175A
FAM175B
FAM177A1
FAM189A2
FAM19A1
FAM19A2
FAM19A3
FAM19A4
FAM19A5
FAM209B
FAM20A
FAM20B
FAM210A
FAM213A
FAM24B
FAM3B
FAM3B
FAM3D
FAM49B
FAM69C
FANCF
FANCL
FANK1
FAP
FARS2
FAS
FAS
FASLG
FASN
FATE1
FAXDC2
FBL
FBLN1
FBLN5
FBP1
FBP2
FBXL4
FBXL4
FBXL5
FBXO3
FCAMR
FCAR
FCER1A
FCER2
FCGR1A
FCGR2A
FCGR2B
FCGR3A
FCGR3B
FCN1
FCN2
FCN2
FCN3
FCRL1
FCRL3
FCRL4
FCRL4
FCRL5
FCRL6
FCRLB
FDCSP
FDX1L
FEN1
FER
FERMT3
FETUB
FEV
FGB
FGF1
FGF10
FGF12
FGF16
FGF17
FGF18
FGF19
FGF2
FGF20
FGF22
FGF23
FGF3
FGF4
FGF5
FGF6
FGF7
FGF8
FGF8
FGF8
FGF8
FGF9
FGFBP1
FGFBP3
FGFR1
FGFR2
FGFR3
FGFR3
FGFR4
FGFRL1
FGG
FGL1
FGL2
FGR
FH
FHIT
FHL1
FIBCD1
FIBP
FIG4
FIGF
FIGF
FIS1
FJX1
FKBP14
FKBP1B
FKBP2
FKBP3
FKBP4
FKBP6
FKBP7
FLII
FLNA
FLRT1
FLRT2
FLRT3
FLRT3
FLT1
FLT1
FLT3
FLT3LG
FLT4
FMOD
FMR1
FN1
FN1
FN1
FNDC4
FOLH1
FOLR1
FOLR2
FOLR3
FOXC2
FOXG1
FOXJ2
FOXL2
FOXM1
FOXO3
FOXRED1
FREM2
FRRS1L
FRS2
FRZB
FSHB
FST
FSTL1
FSTL3
FSTL4
FSTL5
FTCD
FTL
FTMT
FURIN
FUT10
FUT2
FUT3
FUT5
FUT8
FUT9
FXN
FXR1
FYN
FZD10
G0S2
G3BP1
G3BP2
G6B
G6B
G6PD
GAA
GABARAP
GABARAPL1
GABARAPL2
GABBR1
GABBR2
GABBR2
GAD1
GADD45GIP1
GAGE2A
GAGE2D
GAL
GAL3ST1
GAL3ST2
GALE
GALK1
GALNT1
GALNT10
GALNT11
GALNT13
GALNT16
GALNT2
GALNT3
GALP
GAN
GAP43
GAPDH
GAPDHS
GAS1
GAS6
GAS7
GATM
GBP1
GBP2
GBP6
GC
GCA
GCDH
GCG
GCH1
GCK
GCKR
GCLM
GCNT1
GCNT2
GCNT4
GCSH
GDA
GDF10
GDF10
GDF11
GDF15
GDF2
GDF3
GDF5
GDF7
GDF9
GDI1
GDI2
GDNF
GEM
GFAP
GFER
GFRA1
GFRA2
GFRA3
GFRAL
GGA1
GGA3
GGH
GGPS1
GGT2
GH1
GH2
GHDC
GHR
GHRH
GHRH
GHRL
GHRL
GIF
GIMAP6
GIP
GIP
GIPC1
GJA1
GJA8
GJD2
GKN1
GKN2
GLA
GLB1
GLCE
GLIPR1
GLIPR2
GLO1
GLP1R
GLRX
GLRX2
GLRX3
GLRX5
GLT8D1
GLTP
GLTPD2
GLUL
GLYAT
GM2A
GMDS
GMEB2
GMFB
GMFG
GMNN
GMPR
GMPR2
GMPS
GNAI1
GNAI3
GNAS
GNG11
GNGT2
GNLY
GNMT
GNPDA1
GNPNAT1
GNPTG
GNRH1
GNRH2
GNS
GOLGA7
GOLM1
GOLM1
GORAB
GOSR1
GOSR2
GOT1
GP1BA
GP5
GP6
GPC1
GPC2
GPC3
GPC4
GPC5
GPC6
GPCPD1
GPD1
GPD1L
GPHA2
GPI
GPN1
GPNMB
GPNMB
GPR101
GPR107
GPR135
GPR142
GPR26
GPR56
GPR64
GPR68
GPT
GPX1
GPX2
GPX5
GPX7
GRAMD1C
GRAMD1C
GRAP
GRAP2
GRAP2
GRB10
GRB14
GRB2
GRB7
GREM1
GREM2
GRHPR
GRIA4
GRID1
GRID2
GRN
GRP
GRP
GRPEL1
GSKIP
GSN
GSN
GSR
GSS
GSTA1
GSTA3
GSTA4
GSTK1
GSTM1
GSTM3
GSTM4
GSTO1
GSTP1
GSTT1
GSTT2B
GSTZ1
GTF2I
GUCA1A
GUCA2B
GUK1
GULP1
GUSB
GXYLT1
GZMA
GZMB
GZMH
GZMK
GZMM
H1FX
H2AFZ
H6PD
HAAO
HABP4
HADH
HAGH
HAMP
HAO1
HAPLN1
HAPLN4
HARS
HAT1
HAVCR1
HAVCR2
HAVCR2
HBB
HBD
HBEGF
HBQ1
HBZ
HCAR2
HCK
HCN1
HDAC2
HDAC8
HDGF
HDGF
HDGFL1
HDGFRP2
HDGFRP3
HDHD2
HDHD3
HDLBP
HEBP1
HECW1
HEPACAM
HEPACAM2
HEPHL1
HERC1
HERC4
HERC5
HERPUD2
HEXB
[truncated: 2,908 more rows]
