# Supplementary material for: NLRC5-Mediated Epigenetic and Proteomic Regulation of Microglial Panoptosis Drives Neuroinflammation in Multiple Sclerosis
Source: Research Square preprint supplement (doi:10.21203/rs.3.rs-6759227/v1), 2025-06-26
Supplement: Supplementary file 16 [file dc93dd4c935a68b9cab53031.xlsx]

## Sheet: ukb_cis_id
id
A1BG_P04217_OID30771_v1_Inflammation_II
AAMDC_Q9H7C9_OID30236_v1_Cardiometabolic_II
AARSD1_Q9BTE6_OID21311_v1_Oncology
ABCA2_Q9BZC7_OID30146_v1_Cardiometabolic_II
ABHD14B_Q96IU4_OID20921_v1_Neurology
ABL1_P00519_OID21280_v1_Oncology
ABO_P16442_OID30675_v1_Inflammation_II
ABRAXAS2_Q15018_OID30130_v1_Cardiometabolic_II
ACAA1_P09110_OID21269_v1_Oncology
ACADM_P11310_OID31277_v1_Oncology_II
ACADSB_P45954_OID30356_v1_Cardiometabolic_II
ACAN_P16112_OID20159_v1_Cardiometabolic
ACE_P12821_OID30696_v1_Inflammation_II
ACE2_Q9BYF1_OID20105_v1_Cardiometabolic
ACHE_P22303_OID30585_v1_Inflammation_II
ACOT13_Q9NPJ3_OID31522_v1_Oncology_II
ACOX1_Q15067_OID20124_v1_Cardiometabolic
ACP1_P24666_OID30524_v1_Inflammation_II
ACP5_P13686_OID20314_v1_Cardiometabolic
ACP6_Q9NPH0_OID21432_v1_Oncology
ACRBP_Q8NEB7_OID31385_v1_Oncology_II
ACRV1_P26436_OID30513_v1_Inflammation_II
ACSL1_P33121_OID30080_v1_Cardiometabolic_II
ACTA2_P62736_OID20079_v1_Cardiometabolic
ACTN2_P35609_OID30192_v1_Cardiometabolic_II
ACTN4_O43707_OID20435_v1_Inflammation
ACVRL1_P37023_OID20999_v1_Neurology
ACY1_Q03154_OID20137_v1_Cardiometabolic
ACY3_Q96HD9_OID30086_v1_Cardiometabolic_II
ACYP1_P07311_OID30642_v1_Inflammation_II
ADA_P00813_OID20645_v1_Inflammation
ADA2_Q9NZK5_OID20394_v1_Cardiometabolic
ADAM12_O43184_OID30491_v1_Inflammation_II
ADAM15_Q13444_OID20109_v1_Cardiometabolic
ADAM22_Q9P0K1_OID21001_v1_Neurology
ADAM23_O75077_OID20651_v1_Inflammation
ADAM8_P78325_OID21039_v1_Neurology
ADAM9_Q13443_OID31488_v1_Oncology_II
ADAMTS1_Q9UHI8_OID30528_v1_Inflammation_II
ADAMTS13_Q76LX8_OID20249_v1_Cardiometabolic
ADAMTS15_Q8TE58_OID21275_v1_Oncology
ADAMTS16_Q8TE57_OID20089_v1_Cardiometabolic
ADAMTS4_O75173_OID30471_v1_Inflammation_II
ADAMTS8_Q9UP79_OID21502_v1_Oncology
ADAMTSL2_Q86TH1_OID30370_v1_Cardiometabolic_II
ADAMTSL4_Q6UY14_OID30275_v1_Cardiometabolic_II
ADAMTSL5_Q6ZMM2_OID30355_v1_Cardiometabolic_II
ADCYAP1R1_P41586_OID21188_v1_Oncology
ADD1_P35611_OID30655_v1_Inflammation_II
ADGRB3_O60242_OID20974_v1_Neurology
ADGRD1_Q6QNK2_OID30588_v1_Inflammation_II
ADGRE1_Q14246_OID31483_v1_Oncology_II
ADGRE2_Q9UHX3_OID20755_v1_Inflammation
ADGRE5_P48960_OID20260_v1_Cardiometabolic
ADGRF5_Q8IZF2_OID30349_v1_Cardiometabolic_II
ADGRG1_Q9Y653_OID21294_v1_Oncology
ADGRG2_Q8IZP9_OID20189_v1_Cardiometabolic
ADGRV1_Q8WXG9_OID30877_v1_Neurology_II
ADH1B_P00325_OID30612_v1_Inflammation_II
ADH4_P08319_OID20117_v1_Cardiometabolic
ADIPOQ_Q15848_OID30748_v1_Inflammation_II
ADM_P35318_OID21467_v1_Oncology
ADRA2A_P08913_OID30067_v1_Cardiometabolic_II
AFAP1_Q8N556_OID30569_v1_Inflammation_II
AFM_P43652_OID30741_v1_Inflammation_II
AFP_P02771_OID20978_v1_Neurology
AGBL2_Q5U5Z8_OID30793_v1_Neurology_II
AGER_Q15109_OID20756_v1_Inflammation
AGR2_O95994_OID20896_v1_Neurology
AGR3_Q8TD06_OID21243_v1_Oncology
AGRN_O00468_OID20786_v1_Inflammation
AGRP_O00253_OID20658_v1_Inflammation
AGT_P01019_OID30709_v1_Inflammation_II
AGXT_P21549_OID20139_v1_Cardiometabolic
AHCY_P23526_OID20199_v1_Cardiometabolic
AHNAK_Q09666_OID30260_v1_Cardiometabolic_II
AHNAK2_Q8IVF2_OID30244_v1_Cardiometabolic_II
AHSA1_O95433_OID31379_v1_Oncology_II
AHSG_P02765_OID30706_v1_Inflammation_II
AHSP_Q9NZD4_OID21078_v1_Neurology
AIDA_Q96BJ3_OID30956_v1_Neurology_II
AIF1_P55008_OID21234_v1_Oncology
AIF1L_Q9BQI0_OID30204_v1_Cardiometabolic_II
AIFM1_O95831_OID21287_v1_Oncology
AK1_P00568_OID20122_v1_Cardiometabolic
AK2_P54819_OID31142_v1_Neurology_II
AKAP12_Q02952_OID30571_v1_Inflammation_II
AKR1B1_P15121_OID21244_v1_Oncology
AKR1B10_O60218_OID30955_v1_Neurology_II
AKR1C4_P17516_OID20062_v1_Cardiometabolic
AKR7L_Q8NHP1_OID30488_v1_Inflammation_II
AKT1S1_Q96B36_OID20895_v1_Neurology
AKT2_P31751_OID31052_v1_Neurology_II
AKT3_Q9Y243_OID21197_v1_Oncology
ALCAM_Q13740_OID20273_v1_Cardiometabolic
ALDH1A1_P00352_OID21128_v1_Neurology
ALDH2_P05091_OID31380_v1_Oncology_II
ALDH3A1_P30838_OID20512_v1_Inflammation
ALDH5A1_P51649_OID31047_v1_Neurology_II
ALMS1_Q8TCU4_OID31275_v1_Oncology_II
ALPI_P09923_OID30497_v1_Inflammation_II
ALPP_P05187_OID21383_v1_Oncology
AMBN_Q9NP70_OID20437_v1_Inflammation
AMBP_P02760_OID21413_v1_Oncology
AMDHD2_Q9Y303_OID30366_v1_Cardiometabolic_II
AMFR_Q9UKV5_OID20806_v1_Neurology
AMIGO1_Q86WK6_OID30881_v1_Neurology_II
AMIGO2_Q86SJ2_OID21370_v1_Oncology
AMN_Q9BXJ7_OID20492_v1_Inflammation
AMOT_Q4VCS5_OID30572_v1_Inflammation_II
AMOTL2_Q9Y2J4_OID31351_v1_Oncology_II
AMPD3_Q01432_OID31139_v1_Neurology_II
AMY1A_AMY1B_AMY1C_P0DUB6_P0DTE7_P0DTE8_OID30707_v1_Inflammation_II
AMY2A_P04746_OID20333_v1_Cardiometabolic
AMY2B_P19961_OID20340_v1_Cardiometabolic
ANG_P03950_OID20403_v1_Cardiometabolic
ANGPT1_Q15389_OID20740_v1_Inflammation
ANGPT2_O15123_OID21463_v1_Oncology
ANGPTL1_O95841_OID20211_v1_Cardiometabolic
ANGPTL2_Q9UKU9_OID20726_v1_Inflammation
ANGPTL3_Q9Y5C1_OID20407_v1_Cardiometabolic
ANGPTL4_Q9BY76_OID20703_v1_Inflammation
ANGPTL7_O43827_OID21412_v1_Oncology
ANK2_Q01484_OID30161_v1_Cardiometabolic_II
ANKMY2_Q8IV38_OID30518_v1_Inflammation_II
ANKRA2_Q9H9E1_OID31173_v1_Oncology_II
ANKRD54_Q6NXT1_OID21162_v1_Oncology
ANPEP_P15144_OID20350_v1_Cardiometabolic
ANXA1_P04083_OID30617_v1_Inflammation_II
ANXA10_Q9UJ72_OID20886_v1_Neurology
ANXA11_P50995_OID20583_v1_Inflammation
ANXA2_P07355_OID30263_v1_Cardiometabolic_II
ANXA3_P12429_OID21036_v1_Neurology
ANXA4_P09525_OID20123_v1_Cardiometabolic
ANXA5_P08758_OID20810_v1_Neurology
AOC1_P19801_OID20452_v1_Inflammation
AOC3_Q16853_OID20389_v1_Cardiometabolic
AP1G2_O75843_OID31348_v1_Oncology_II
AP2B1_P63010_OID30949_v1_Neurology_II
AP3B1_O00203_OID31478_v1_Oncology_II
AP3S2_P59780_OID31117_v1_Neurology_II
APBB1IP_Q7Z5R6_OID21359_v1_Oncology
APCS_P02743_OID30778_v1_Inflammation_II
APEX1_P27695_OID21434_v1_Oncology
APLP1_P51693_OID20164_v1_Cardiometabolic
APOA1_P02647_OID30769_v1_Inflammation_II
APOA2_P02652_OID30686_v1_Inflammation_II
APOA4_P06727_OID30733_v1_Inflammation_II
APOB_P04114_OID30673_v1_Inflammation_II
APOBR_Q0VD83_OID30246_v1_Cardiometabolic_II
APOC1_P02654_OID30749_v1_Inflammation_II
APOD_P05090_OID30746_v1_Inflammation_II
APOE_P02649_OID30727_v1_Inflammation_II
APOF_Q13790_OID30701_v1_Inflammation_II
APOH_P02749_OID21072_v1_Neurology
APOL1_O14791_OID30708_v1_Inflammation_II
APOM_O95445_OID20374_v1_Cardiometabolic
APP_P05067_OID21070_v1_Neurology
APPL2_Q8NEU8_OID30590_v1_Inflammation_II
APRT_P07741_OID20927_v1_Neurology
ARAF_P10398_OID31260_v1_Oncology_II
AREG_P15514_OID21357_v1_Oncology
ARF6_P62330_OID31523_v1_Oncology_II
ARFIP1_P53367_OID31024_v1_Neurology_II
ARG1_P05089_OID21445_v1_Oncology
ARG2_P78540_OID31339_v1_Oncology_II
ARHGAP1_Q07960_OID21202_v1_Oncology
ARHGAP25_P42331_OID21255_v1_Oncology
ARHGAP30_Q7Z6I6_OID31336_v1_Oncology_II
ARHGAP45_Q92619_OID30653_v1_Inflammation_II
ARHGAP5_Q13017_OID31190_v1_Oncology_II
ARHGEF1_Q92888_OID31133_v1_Neurology_II
ARHGEF10_O15013_OID30994_v1_Neurology_II
ARHGEF12_Q9NZN5_OID20554_v1_Inflammation
ARHGEF5_Q12774_OID30871_v1_Neurology_II
ARID3A_Q99856_OID30861_v1_Neurology_II
ARID4B_Q4LE39_OID20803_v1_Neurology
ARL13B_Q3SXY8_OID30166_v1_Cardiometabolic_II
ARL2BP_Q9Y2Y0_OID30121_v1_Cardiometabolic_II
ARMCX2_Q7L311_OID30792_v1_Neurology_II
ARNT_P27540_OID20432_v1_Inflammation
ARSA_P15289_OID21138_v1_Neurology
ARSB_P15848_OID21331_v1_Oncology
ART3_Q13508_OID20346_v1_Cardiometabolic
ART5_Q96L15_OID30828_v1_Neurology_II
ARTN_Q5T4W7_OID20446_v1_Inflammation
ASAH1_Q13510_OID30415_v1_Cardiometabolic_II
ASAH2_Q9NR71_OID20996_v1_Neurology
ASGR1_P07306_OID20990_v1_Neurology
ASGR2_P07307_OID30679_v1_Inflammation_II
ASPN_Q9BXN1_OID30315_v1_Cardiometabolic_II
ASPSCR1_Q9BZE9_OID31055_v1_Neurology_II
ASRGL1_Q7L266_OID30283_v1_Cardiometabolic_II
ASS1_P00966_OID30170_v1_Cardiometabolic_II
ATF2_P15336_OID20798_v1_Neurology
ATF4_P18848_OID31162_v1_Oncology_II
ATG16L1_Q676U5_OID31466_v1_Oncology_II
ATG4A_Q8WYN0_OID21246_v1_Oncology
ATOX1_O00244_OID21476_v1_Oncology
ATP1B1_P05026_OID30124_v1_Cardiometabolic_II
ATP1B2_P14415_OID30118_v1_Cardiometabolic_II
ATP1B3_P54709_OID30065_v1_Cardiometabolic_II
ATP1B4_Q9UN42_OID31230_v1_Oncology_II
ATP2B4_P23634_OID30062_v1_Cardiometabolic_II
ATP5F1D_P30049_OID30079_v1_Cardiometabolic_II
ATP5IF1_Q9UII2_OID20760_v1_Inflammation
ATP5PO_P48047_OID20811_v1_Neurology
ATP6AP2_O75787_OID21178_v1_Oncology
ATP6V1D_Q9Y5K8_OID21341_v1_Oncology
ATP6V1F_Q16864_OID20843_v1_Neurology
ATP6V1G1_O75348_OID30242_v1_Cardiometabolic_II
ATP6V1G2_O95670_OID30167_v1_Cardiometabolic_II
ATRAID_Q6UW56_OID31451_v1_Oncology_II
ATRN_O75882-2_OID30735_v1_Inflammation_II
ATXN10_Q9UBB4_OID20865_v1_Neurology
ATXN2_Q99700_OID30850_v1_Neurology_II
ATXN2L_Q8WWM7_OID30980_v1_Neurology_II
ATXN3_P54252_OID31149_v1_Neurology_II
AXIN1_O15169_OID20582_v1_Inflammation
AXL_P30530_OID20363_v1_Cardiometabolic
AZI2_Q9H6S1_OID31056_v1_Neurology_II
AZU1_P20160_OID20309_v1_Cardiometabolic
B2M_P61769_OID30725_v1_Inflammation_II
B3GAT3_O94766_OID30165_v1_Cardiometabolic_II
B3GNT7_Q8NFL0_OID30281_v1_Cardiometabolic_II
B4GALT1_P15291_OID20780_v1_Inflammation
B4GAT1_O43505_OID21127_v1_Neurology
BABAM1_Q9NWV8_OID30466_v1_Inflammation_II
BACH1_O14867_OID20505_v1_Inflammation
BAG3_O95817_OID20972_v1_Neurology
BAG4_O95429_OID30474_v1_Inflammation_II
BAG6_P46379_OID20114_v1_Cardiometabolic
BAIAP2_Q9UQB8_OID21250_v1_Oncology
BAMBI_Q13145_OID21267_v1_Oncology
BANK1_Q8NDB2_OID20594_v1_Inflammation
BATF_Q16520_OID30896_v1_Neurology_II
BAX_Q07812_OID20856_v1_Neurology
BCAM_P50895_OID21076_v1_Neurology
BCAN_Q96GW7_OID20998_v1_Neurology
BCAT1_P54687_OID30312_v1_Cardiometabolic_II
BCAT2_O15382_OID30844_v1_Neurology_II
BCHE_P06276_OID30717_v1_Inflammation_II
BCL2_P10415_OID31454_v1_Oncology_II
BCL2L1_Q07817_OID31152_v1_Neurology_II
BCL2L11_O43521-2_OID20513_v1_Inflammation
BCL2L15_Q5TBC7_OID30498_v1_Inflammation_II
BCL7A_Q4VC05_OID31218_v1_Oncology_II
BCL7B_Q9BQE9_OID31421_v1_Oncology_II
BCR_P11274_OID20558_v1_Inflammation
BDNF_P23560_OID30373_v1_Cardiometabolic_II
BECN1_Q14457_OID30220_v1_Cardiometabolic_II
BEX3_Q00994_OID31202_v1_Oncology_II
BGLAP_P02818_OID30389_v1_Cardiometabolic_II
BGN_P21810_OID21198_v1_Oncology
BHLHE40_O14503_OID30873_v1_Neurology_II
BHMT2_Q9H2M3_OID30051_v1_Cardiometabolic_II
BID_P55957_OID20517_v1_Inflammation
BIN2_Q9UBW5_OID21067_v1_Neurology
BIRC2_Q13490_OID21217_v1_Oncology
BLMH_Q13867_OID20336_v1_Cardiometabolic
BLNK_Q8WV28_OID30541_v1_Inflammation_II
BLOC1S2_Q6QNY1_OID30856_v1_Neurology_II
BLOC1S3_Q6QNY0_OID31106_v1_Neurology_II
BLVRB_P30043_OID21141_v1_Neurology
BMP10_O95393_OID30575_v1_Inflammation_II
BMP4_P12644_OID20994_v1_Neurology
BMP6_P22004_OID20111_v1_Cardiometabolic
BMPER_Q8N8U9_OID30615_v1_Inflammation_II
BNIP2_Q12982_OID30292_v1_Cardiometabolic_II
BNIP3L_O60238_OID30525_v1_Inflammation_II
BOC_Q9BWV1_OID20116_v1_Cardiometabolic
BOLA1_Q9Y3E2_OID30837_v1_Neurology_II
BOLA2_BOLA2B_Q9H3K6_OID30267_v1_Cardiometabolic_II
BPIFA2_Q96DR5_OID30279_v1_Cardiometabolic_II
BPIFB1_Q8TDL5_OID20308_v1_Cardiometabolic
BPIFB2_Q8N4F0_OID30311_v1_Cardiometabolic_II
BRAP_Q7Z569_OID31506_v1_Oncology_II
BRD1_O95696_OID31259_v1_Oncology_II
BRD2_P25440_OID30826_v1_Neurology_II
BRD3_Q15059_OID30093_v1_Cardiometabolic_II
BRDT_Q58F21_OID30179_v1_Cardiometabolic_II
BRK1_Q8WUW1_OID20883_v1_Neurology
BRME1_Q0VDD7_OID30847_v1_Neurology_II
BRSK2_Q8IWQ3_OID31042_v1_Neurology_II
BSG_P35613_OID20626_v1_Inflammation
BSND_Q8WZ55_OID31184_v1_Oncology_II
BST1_Q10588_OID21051_v1_Neurology
BST2_Q10589_OID21029_v1_Neurology
BTC_P35070_OID21199_v1_Oncology
BTD_P43251_OID30754_v1_Inflammation_II
BTLA_Q7Z6A9_OID31237_v1_Oncology_II
BTN1A1_Q13410_OID31363_v1_Oncology_II
BTN2A1_Q7KYR7_OID20713_v1_Inflammation
BTN3A2_P78410_OID20540_v1_Inflammation
C19orf12_Q9NSK7_OID20804_v1_Neurology
C1GALT1C1_Q96EU7_OID30180_v1_Cardiometabolic_II
C1QA_P02745_OID20654_v1_Inflammation
C1QBP_Q07021_OID31007_v1_Neurology_II
C1QL2_Q7Z5L3_OID30515_v1_Inflammation_II
C1QTNF1_Q9BXJ1_OID20367_v1_Cardiometabolic
C1QTNF5_Q9BXJ0_OID30618_v1_Inflammation_II
C1QTNF6_Q9BXI9_OID31049_v1_Neurology_II
C1QTNF9_P0C862_OID30620_v1_Inflammation_II
C1R_P00736_OID30753_v1_Inflammation_II
C1RL_Q9NZP8_OID30721_v1_Inflammation_II
C1S_P09871_OID30731_v1_Inflammation_II
C2_P06681_OID20410_v1_Cardiometabolic
C2CD2L_O14523_OID20864_v1_Neurology
C2orf69_Q8N8R5_OID30883_v1_Neurology_II
C3_P01024_OID30776_v1_Inflammation_II
C4BPB_P20851_OID21481_v1_Oncology
C5_P01031_OID30744_v1_Inflammation_II
C7_P10643_OID30766_v1_Inflammation_II
C7orf50_Q9BRJ6_OID31095_v1_Neurology_II
C8B_P07358_OID30719_v1_Inflammation_II
C9_P02748_OID30698_v1_Inflammation_II
C9orf40_Q8IXQ3_OID31489_v1_Oncology_II
CA1_P00915_OID20409_v1_Cardiometabolic
CA11_O75493_OID21195_v1_Oncology
CA12_O43570_OID21344_v1_Oncology
CA13_Q8N1Q1_OID20225_v1_Cardiometabolic
CA14_Q9ULX7_OID21401_v1_Oncology
CA2_P00918_OID21149_v1_Neurology
CA3_P07451_OID20271_v1_Cardiometabolic
CA4_P22748_OID20241_v1_Cardiometabolic
CA5A_P35218_OID20075_v1_Cardiometabolic
CA6_P23280_OID21096_v1_Neurology
CA7_P43166_OID31265_v1_Oncology_II
CA8_P35219_OID30482_v1_Inflammation_II
CA9_Q16790_OID21417_v1_Oncology
CABP2_Q9NPB3_OID30916_v1_Neurology_II
CACNA1C_Q13936_OID30840_v1_Neurology_II
CACNA1H_O95180_OID30064_v1_Cardiometabolic_II
CACNB1_Q02641_OID30820_v1_Neurology_II
CACNB3_P54284_OID31039_v1_Neurology_II
CACYBP_Q9HB71_OID30649_v1_Inflammation_II
CADPS_Q9ULU8_OID30915_v1_Neurology_II
CALB1_P05937_OID21306_v1_Oncology
CALB2_P22676_OID20801_v1_Neurology
CALCA_P01258_OID20983_v1_Neurology
CALCB_P10092_OID31100_v1_Neurology_II
CALCOCO1_Q9P1Z2_OID21387_v1_Oncology
CALCOCO2_Q13137_OID30249_v1_Cardiometabolic_II
CALY_Q9NYX4_OID30144_v1_Cardiometabolic_II
CAMKK1_Q8N5S9_OID21182_v1_Oncology
CAMLG_P49069_OID30952_v1_Neurology_II
CAMSAP1_Q5T5Y3_OID31070_v1_Neurology_II
CANT1_Q8WVQ1_OID20181_v1_Cardiometabolic
CAPG_P40121_OID21431_v1_Oncology
CAPN3_P20807_OID31384_v1_Oncology_II
CAPS_Q13938_OID31126_v1_Neurology_II
CARHSP1_Q9Y2V2_OID20859_v1_Neurology
CASC3_O15234_OID30921_v1_Neurology_II
CASP1_P29466_OID20854_v1_Neurology
CASP10_Q92851_OID20893_v1_Neurology
CASP2_P42575_OID20555_v1_Inflammation
CASP3_P42574_OID20305_v1_Cardiometabolic
CASP4_P49662_OID31276_v1_Oncology_II
CASP7_P55210_OID31135_v1_Neurology_II
CASP8_Q14790_OID21414_v1_Oncology
CASP9_P55211_OID30530_v1_Inflammation_II
CASQ2_O14958_OID30063_v1_Cardiometabolic_II
CAT_P04040_OID30712_v1_Inflammation_II
CBLIF_P27352_OID20179_v1_Cardiometabolic
CBLN1_P23435_OID30851_v1_Neurology_II
CBLN4_Q9NTU7_OID21386_v1_Oncology
CBS_P35520_OID30200_v1_Cardiometabolic_II
CBX2_Q14781_OID30177_v1_Cardiometabolic_II
CC2D1A_Q6P1N0_OID20958_v1_Neurology
CCAR2_Q8N163_OID31077_v1_Neurology_II
CCDC134_Q9H6E4_OID31413_v1_Oncology_II
CCDC28A_Q8IWP9_OID30973_v1_Neurology_II
CCDC50_Q8IVM0_OID31001_v1_Neurology_II
CCDC80_Q76M96_OID20226_v1_Cardiometabolic
CCER2_I3L3R5_OID30221_v1_Cardiometabolic_II
CCL11_P51671_OID20668_v1_Inflammation
CCL13_Q99616_OID20655_v1_Inflammation
CCL14_Q16627_OID20401_v1_Cardiometabolic
CCL15_Q16663_OID20328_v1_Cardiometabolic
CCL16_O15467_OID20334_v1_Cardiometabolic
CCL17_Q92583_OID20745_v1_Inflammation
CCL18_P55774_OID20395_v1_Cardiometabolic
CCL19_Q99731_OID21030_v1_Neurology
CCL2_P13500_OID21004_v1_Neurology
CCL20_P78556_OID20671_v1_Inflammation
CCL21_O00585_OID20686_v1_Inflammation
CCL22_O00626_OID20765_v1_Inflammation
CCL23_P55773_OID20693_v1_Inflammation
CCL24_O00175_OID20772_v1_Inflammation
CCL25_O15444_OID20674_v1_Inflammation
CCL26_Q9Y258_OID20546_v1_Inflammation
CCL27_Q9Y4X3_OID20121_v1_Cardiometabolic
CCL28_Q9NRJ3_OID20569_v1_Inflammation
CCL3_P10147_OID20610_v1_Inflammation
CCL4_P13236_OID20695_v1_Inflammation
CCL5_P13501_OID20412_v1_Cardiometabolic
CCL7_P80098_OID20523_v1_Inflammation
CCL8_P80075_OID21466_v1_Oncology
CCN1_O00622_OID21368_v1_Oncology
CCN2_P29279_OID20709_v1_Inflammation
CCN3_P48745_OID20299_v1_Cardiometabolic
CCN4_O95388_OID21444_v1_Oncology
CCN5_O76076_OID21068_v1_Neurology
CCND2_P30279_OID31316_v1_Oncology_II
CCNE1_P24864_OID30456_v1_Inflammation_II
CCS_O14618_OID20973_v1_Neurology
CCT5_P48643_OID21200_v1_Oncology
CD101_Q93033_OID31480_v1_Oncology_II
CD109_Q6YHK3_OID21108_v1_Neurology
CD14_P08571_OID20378_v1_Cardiometabolic
CD160_O95971_OID20647_v1_Inflammation
CD163_Q86VB7_OID20360_v1_Cardiometabolic
CD164_Q04900_OID21080_v1_Neurology
CD164L2_Q6UWJ8_OID30922_v1_Neurology_II
CD177_Q8N6Q3_OID21119_v1_Neurology
CD1C_P29017_OID21483_v1_Oncology
CD2_P06729_OID30097_v1_Cardiometabolic_II
CD200_P41217_OID20603_v1_Inflammation
CD200R1_Q8TD46_OID20595_v1_Inflammation
CD207_Q9UJ71_OID21298_v1_Oncology
CD209_Q9NNX6_OID20262_v1_Cardiometabolic
CD22_P20273_OID20637_v1_Inflammation
CD226_Q15762_OID30556_v1_Inflammation_II
CD244_Q9BZW8_OID20628_v1_Inflammation
CD248_Q9HCU0_OID30394_v1_Cardiometabolic_II
CD27_P26842_OID21527_v1_Oncology
CD274_Q9NZQ7_OID20966_v1_Neurology
CD276_Q5ZPR3_OID20680_v1_Inflammation
CD28_P10747_OID21265_v1_Oncology
CD2AP_Q9Y5K6_OID20177_v1_Cardiometabolic
CD300A_Q9UGN4_OID30576_v1_Inflammation_II
CD300C_Q08708_OID21010_v1_Neurology
CD300E_Q496F6_OID21418_v1_Oncology
CD300LF_Q8TDQ1_OID21469_v1_Oncology
CD300LG_Q6UXG3_OID21130_v1_Neurology
CD302_Q8IX05_OID21328_v1_Oncology
CD33_P20138_OID21472_v1_Oncology
CD34_P28906_OID21025_v1_Neurology
CD36_P16671_OID30485_v1_Inflammation_II
CD38_P28907_OID21316_v1_Oncology
CD3D_P04234_OID30827_v1_Neurology_II
CD3E_P07766_OID31302_v1_Oncology_II
CD3G_P09693_OID30448_v1_Inflammation_II
CD4_P01730_OID20584_v1_Inflammation
CD40_P25942_OID20724_v1_Inflammation
CD40LG_P29965_OID20616_v1_Inflammation
CD46_P15529_OID20380_v1_Cardiometabolic
CD48_P09326_OID20692_v1_Inflammation
CD5_P06127_OID21449_v1_Oncology
CD55_P08174_OID20377_v1_Cardiometabolic
CD58_P19256_OID20716_v1_Inflammation
CD59_P13987_OID20339_v1_Cardiometabolic
CD5L_O43866_OID30775_v1_Inflammation_II
CD6_P30203_OID20649_v1_Inflammation
CD63_P08962_OID20988_v1_Neurology
CD69_Q07108_OID20206_v1_Cardiometabolic
CD7_P09564_OID30543_v1_Inflammation_II
CD70_P32970_OID20599_v1_Inflammation
CD72_P21854_OID30641_v1_Inflammation_II
CD74_P04233_OID21040_v1_Neurology
CD79B_P40259_OID20635_v1_Inflammation
CD80_P33681_OID30291_v1_Cardiometabolic_II
CD82_P27701_OID31256_v1_Oncology_II
CD83_Q01151_OID20565_v1_Inflammation
CD84_Q9UIB8_OID20607_v1_Inflammation
CD86_P42081_OID31500_v1_Oncology_II
CD8A_P01732_OID21018_v1_Neurology
CD93_Q9NPY3_OID20397_v1_Cardiometabolic
CD99_P14209_OID21110_v1_Neurology
CD99L2_Q8TCZ2_OID21122_v1_Neurology
CDA_P32320_OID30345_v1_Cardiometabolic_II
CDAN1_Q8IWY9_OID31076_v1_Neurology_II
CDC123_O75794_OID31242_v1_Oncology_II
CDC25A_P30304_OID31189_v1_Oncology_II
CDC26_Q8NHZ8_OID31508_v1_Oncology_II
CDC27_P30260_OID21238_v1_Oncology
CDC37_Q16543_OID21470_v1_Oncology
CDC42BPB_Q9Y5S2_OID31485_v1_Oncology_II
CDCP1_Q9H5V8_OID20940_v1_Neurology
CDH1_P12830_OID20353_v1_Cardiometabolic
CDH15_P55291_OID21005_v1_Neurology
CDH17_Q12864_OID20134_v1_Cardiometabolic
CDH2_P19022_OID20170_v1_Cardiometabolic
CDH22_Q9UJ99_OID31332_v1_Oncology_II
CDH23_Q9H251_OID31074_v1_Neurology_II
CDH3_P22223_OID21008_v1_Neurology
CDH4_P55283_OID30875_v1_Neurology_II
CDH5_P33151_OID20243_v1_Cardiometabolic
CDH6_P55285_OID20157_v1_Cardiometabolic
CDHR1_Q96JP9_OID20808_v1_Neurology
CDHR2_Q9BYE9_OID21282_v1_Oncology
CDHR5_Q9HBB8_OID20193_v1_Cardiometabolic
CDK1_P06493_OID31164_v1_Oncology_II
CDK5RAP3_Q96JB5_OID30985_v1_Neurology_II
CDKL5_O76039_OID30796_v1_Neurology_II
CDKN1A_P38936_OID21319_v1_Oncology
CDKN2D_P55273_OID21295_v1_Oncology
CDNF_Q49AH0_OID21318_v1_Oncology
CDON_Q4KMG0_OID20754_v1_Inflammation
CDSN_Q15517_OID20667_v1_Inflammation
CEACAM1_P13688_OID21528_v1_Oncology
CEACAM16_Q2WEN9_OID31495_v1_Oncology_II
CEACAM18_A8MTB9_OID31251_v1_Oncology_II
CEACAM19_Q7Z692_OID31443_v1_Oncology_II
CEACAM20_Q6UY09_OID31308_v1_Oncology_II
CEACAM21_Q3KPI0_OID20548_v1_Inflammation
CEACAM3_P40198_OID21245_v1_Oncology
CEACAM5_P06731_OID21171_v1_Oncology
CEACAM6_P40199_OID30362_v1_Cardiometabolic_II
CEACAM8_P31997_OID20102_v1_Cardiometabolic
CEBPA_P49715_OID30458_v1_Inflammation_II
CEBPB_P17676_OID20052_v1_Cardiometabolic
CELA2A_P08217_OID30411_v1_Cardiometabolic_II
CELA3A_P09093_OID20298_v1_Cardiometabolic
CELSR2_Q9HCU4_OID30593_v1_Inflammation_II
CEMIP2_Q9UHN6_OID30499_v1_Inflammation_II
CEND1_Q8N111_OID30821_v1_Neurology_II
CENPF_P49454_OID31329_v1_Oncology_II
CENPJ_Q9HC77_OID31314_v1_Oncology_II
CEP112_Q8N8E3_OID30115_v1_Cardiometabolic_II
CEP152_O94986_OID31249_v1_Oncology_II
CEP164_Q9UPV0_OID20441_v1_Inflammation
CEP170_Q5SW79_OID30240_v1_Cardiometabolic_II
CEP20_Q96NB1_OID21209_v1_Oncology
CEP290_O15078_OID31287_v1_Oncology_II
CEP350_Q5VT06_OID31247_v1_Oncology_II
CEP43_O95684_OID20084_v1_Cardiometabolic
CEP85_Q6P2H3_OID21241_v1_Oncology
CES1_P23141_OID20244_v1_Cardiometabolic
CES2_O00748_OID21366_v1_Oncology
CES3_Q6UWW8_OID21340_v1_Oncology
CETN2_P41208_OID20836_v1_Neurology
CETN3_O15182_OID31525_v1_Oncology_II
CFB_P00751_OID30755_v1_Inflammation_II
CFC1_P0CG37_OID21261_v1_Oncology
CFD_P00746_OID30738_v1_Inflammation_II
CFH_P08603_OID30790_v1_Inflammation_II
CFHR2_P36980_OID30720_v1_Inflammation_II
CFHR4_Q92496_OID30758_v1_Inflammation_II
CFHR5_Q9BXR6_OID30716_v1_Inflammation_II
CFI_P05156_OID30772_v1_Inflammation_II
CFP_P27918_OID30784_v1_Inflammation_II
CGA_P01215_OID21069_v1_Neurology
CGB3_CGB5_CGB8_P0DN86_OID30671_v1_Inflammation_II
CGN_Q9P2M7_OID30894_v1_Neurology_II
CGREF1_Q99674_OID20152_v1_Cardiometabolic
CHAC2_Q8WUX2_OID21230_v1_Oncology
CHAD_O15335_OID30660_v1_Inflammation_II
CHCHD10_Q8WYQ3_OID31116_v1_Neurology_II
CHCHD6_Q9BRQ6_OID31426_v1_Oncology_II
CHEK2_O96017_OID20054_v1_Cardiometabolic
CHGA_P10645_OID30403_v1_Cardiometabolic_II
CHGB_P05060_OID21038_v1_Neurology
CHI3L1_P36222_OID20399_v1_Cardiometabolic
CHIT1_Q13231_OID20312_v1_Cardiometabolic
CHL1_O00533_OID20366_v1_Cardiometabolic
CHM_P24386_OID30972_v1_Neurology_II
CHMP1A_Q9HD42_OID20930_v1_Neurology
CHMP6_Q96FZ7_OID30327_v1_Cardiometabolic_II
CHP1_Q99653_OID30869_v1_Neurology_II
CHRDL1_Q9BU40_OID20771_v1_Inflammation
CHRDL2_Q6WN34_OID20223_v1_Cardiometabolic
CHRM1_P11229_OID30930_v1_Neurology_II
CIAPIN1_Q6FI81_OID21501_v1_Oncology
CILP_O75339_OID30399_v1_Cardiometabolic_II
CINP_Q9BW66_OID31328_v1_Oncology_II
CIRBP_Q14011_OID31503_v1_Oncology_II
CIT_O14578_OID30970_v1_Neurology_II
CKAP4_Q07065_OID20617_v1_Inflammation
CKB_P12277_OID30400_v1_Cardiometabolic_II
CKMT1A_CKMT1B_P12532_OID20721_v1_Inflammation
CLASP1_Q7Z460_OID31192_v1_Oncology_II
CLC_Q05315_OID20126_v1_Cardiometabolic
CLEC10A_Q8IUN9_OID20928_v1_Neurology
CLEC11A_Q9Y240_OID21112_v1_Neurology
CLEC12A_Q5QGZ9_OID30552_v1_Inflammation_II
CLEC14A_Q86T13_OID21090_v1_Neurology
CLEC1A_Q8NC01_OID20099_v1_Cardiometabolic
CLEC1B_Q9P126_OID21061_v1_Neurology
CLEC2L_P0C7M8_OID30884_v1_Neurology_II
CLEC3B_P05452_OID30756_v1_Inflammation_II
CLEC4A_Q9UMR7_OID20573_v1_Inflammation
CLEC4C_Q8WTT0_OID20547_v1_Inflammation
CLEC4D_Q8WXI8_OID20609_v1_Inflammation
CLEC4G_Q6UXB4_OID20590_v1_Inflammation
CLEC4M_Q9H2X3_OID30405_v1_Cardiometabolic_II
CLEC5A_Q9NY25_OID20165_v1_Cardiometabolic
CLEC6A_Q6EIG7_OID21228_v1_Oncology
CLEC7A_Q9BXN2_OID20636_v1_Inflammation
CLGN_O14967_OID30957_v1_Neurology_II
CLIC5_Q9NZA1_OID30890_v1_Neurology_II
CLINT1_Q14677_OID31182_v1_Oncology_II
CLIP2_Q9UDT6_OID20559_v1_Inflammation
CLMP_Q9H6B4_OID21419_v1_Oncology
CLNS1A_P54105_OID30929_v1_Neurology_II
CLPP_Q16740_OID20910_v1_Neurology
CLPS_P04118_OID21156_v1_Neurology
CLSPN_Q9HAW4_OID20831_v1_Neurology
CLSTN1_O94985_OID20874_v1_Neurology
CLSTN2_Q9H4D0_OID20664_v1_Inflammation
CLSTN3_Q9BQT9_OID31092_v1_Neurology_II
CLTA_P09496_OID20118_v1_Cardiometabolic
CLU_P10909_OID30732_v1_Inflammation_II
CLUL1_Q15846_OID20198_v1_Cardiometabolic
CMC1_Q7Z7K0_OID30360_v1_Cardiometabolic_II
CMIP_Q8IY22_OID31406_v1_Oncology_II
CNDP1_Q96KN2_OID20347_v1_Cardiometabolic
CNGB3_Q9NQW8_OID30805_v1_Neurology_II
CNP_P09543_OID30285_v1_Cardiometabolic_II
CNPY2_Q9Y2B0_OID20069_v1_Cardiometabolic
CNPY4_Q8N129_OID21317_v1_Oncology
CNST_Q6PJW8_OID20127_v1_Cardiometabolic
CNTF_P26441_OID30807_v1_Neurology_II
CNTN1_Q12860_OID20307_v1_Cardiometabolic
CNTN2_Q02246_OID21426_v1_Oncology
CNTN3_Q9P232_OID21092_v1_Neurology
CNTN4_Q8IWV2_OID21117_v1_Neurology
CNTN5_O94779_OID21006_v1_Neurology
CNTNAP2_Q9UHC6_OID20556_v1_Inflammation
CNTNAP4_Q9C0A0_OID30911_v1_Neurology_II
COCH_O43405_OID30305_v1_Cardiometabolic_II
COL15A1_P39059_OID30396_v1_Cardiometabolic_II
COL18A1_P39060_OID20332_v1_Cardiometabolic
COL1A1_P02452_OID20335_v1_Cardiometabolic
COL24A1_Q17RW2_OID31464_v1_Oncology_II
COL28A1_Q2UY09_OID30969_v1_Neurology_II
COL2A1_P02458_OID30286_v1_Cardiometabolic_II
COL3A1_P02461_OID30379_v1_Cardiometabolic_II
COL4A1_P02462_OID20208_v1_Cardiometabolic
COL4A4_P53420_OID31333_v1_Oncology_II
COL5A1_P20908_OID30587_v1_Inflammation_II
COL6A3_P12111_OID20292_v1_Cardiometabolic
COL9A1_P20849_OID20550_v1_Inflammation
COL9A2_Q14055_OID31255_v1_Oncology_II
COLEC12_Q5KU26_OID20738_v1_Inflammation
COMMD1_Q8N668_OID30222_v1_Cardiometabolic_II
COMMD9_Q9P000_OID31390_v1_Oncology_II
COMP_P49747_OID20405_v1_Cardiometabolic
COMT_P21964_OID20086_v1_Cardiometabolic
COPB2_P35606_OID30173_v1_Cardiometabolic_II
COPE_O14579_OID20797_v1_Neurology
COQ7_Q99807_OID30217_v1_Cardiometabolic_II
CORO1A_P31146_OID20286_v1_Cardiometabolic
CORO6_Q6QEF8_OID30870_v1_Neurology_II
COX5B_P10606_OID21297_v1_Oncology
COX6B1_P14854_OID30317_v1_Cardiometabolic_II
CPA1_P15085_OID20280_v1_Cardiometabolic
CPA2_P48052_OID21060_v1_Neurology
CPA4_Q9UI42_OID30606_v1_Inflammation_II
CPB1_P15086_OID20289_v1_Cardiometabolic
CPB2_Q96IY4_OID30734_v1_Inflammation_II
CPE_P16870_OID21392_v1_Oncology
CPLX2_Q6PUV4_OID31186_v1_Oncology_II
CPM_P14384_OID21054_v1_Neurology
CPOX_P36551_OID30495_v1_Inflammation_II
CPPED1_Q9BRF8_OID21053_v1_Neurology
CPQ_Q9Y646_OID30406_v1_Cardiometabolic_II
CPTP_Q5TA50_OID30106_v1_Cardiometabolic_II
CPVL_Q9H3G5_OID21435_v1_Oncology
CPXM1_Q96SM3_OID21479_v1_Oncology
CPXM2_Q8N436_OID30322_v1_Cardiometabolic_II
CR1_P17927_OID30697_v1_Inflammation_II
CR2_P20023_OID20393_v1_Cardiometabolic
CRACR2A_Q9BSW2_OID21249_v1_Oncology
CRADD_P78560_OID20923_v1_Neurology
CREB3_O43889_OID31188_v1_Oncology_II
CREBZF_Q9NS37_OID31206_v1_Oncology_II
CREG1_O75629_OID21515_v1_Oncology
CRELD1_Q96HD1_OID30619_v1_Inflammation_II
CRELD2_Q6UXH1_OID20751_v1_Inflammation
CRH_P06850_OID21257_v1_Oncology
CRHBP_P24387_OID20747_v1_Inflammation
CRHR1_P34998_OID20055_v1_Cardiometabolic
CRIM1_Q9NZV1_OID20701_v1_Inflammation
CRIP2_P52943_OID20901_v1_Neurology
CRISP2_P16562_OID21456_v1_Oncology
CRISP3_P54108_OID30715_v1_Inflammation_II
CRKL_P46109_OID20742_v1_Inflammation
CRLF1_O75462_OID20699_v1_Inflammation
CRNN_Q9UBG3_OID21427_v1_Oncology
CRTAC1_Q9NQ79_OID20279_v1_Cardiometabolic
CRTAM_O95727_OID20914_v1_Neurology
CRTAP_O75718_OID30902_v1_Neurology_II
CRX_O43186_OID20070_v1_Cardiometabolic
CRYBB1_P53674_OID30319_v1_Cardiometabolic_II
CRYBB2_P43320_OID31081_v1_Neurology_II
CRYGD_P07320_OID31144_v1_Neurology_II
CRYM_Q14894_OID30815_v1_Neurology_II
CRYZL1_O95825_OID30272_v1_Cardiometabolic_II
CSDE1_O75534_OID30183_v1_Cardiometabolic_II
CSF1_P09603_OID20719_v1_Inflammation
CSF1R_P07333_OID30681_v1_Inflammation_II
CSF2_P04141_OID30072_v1_Cardiometabolic_II
CSF2RA_P15509_OID20915_v1_Neurology
CSF2RB_P32927_OID30553_v1_Inflammation_II
CSF3_P09919_OID20491_v1_Inflammation
CSF3R_Q99062_OID30527_v1_Inflammation_II
CSH1_P0DML2_OID30667_v1_Inflammation_II
CSNK1D_P48730_OID30492_v1_Inflammation_II
CSNK2A1_P68400_OID31053_v1_Neurology_II
CSPG4_Q6UVK1_OID30397_v1_Cardiometabolic_II
CSPG5_O95196_OID30843_v1_Neurology_II
CSRP3_P50461_OID30176_v1_Cardiometabolic_II
CST1_P01037_OID30581_v1_Inflammation_II
CST3_P01034_OID20400_v1_Cardiometabolic
CST5_P28325_OID20995_v1_Neurology
CST6_Q15828_OID20293_v1_Cardiometabolic
CST7_O76096_OID20704_v1_Inflammation
CSTB_P04080_OID20294_v1_Cardiometabolic
CTAG1A_CTAG1B_P78358_OID31299_v1_Oncology_II
CTBS_Q01459_OID30710_v1_Inflammation_II
CTF1_Q16619_OID20061_v1_Cardiometabolic
CTHRC1_Q96CG8_OID30393_v1_Cardiometabolic_II
CTLA4_P16410_OID30363_v1_Cardiometabolic_II
CTNNA1_P35221_OID30800_v1_Neurology_II
CTRB1_P17538_OID21150_v1_Neurology
CTRC_Q99895_OID20752_v1_Inflammation
CTRL_P40313_OID31157_v1_Neurology_II
CTSB_P07858_OID20276_v1_Cardiometabolic
CTSC_P53634_OID20679_v1_Inflammation
CTSD_P07339_OID20358_v1_Cardiometabolic
CTSE_P14091_OID30628_v1_Inflammation_II
CTSF_Q9UBX1_OID21500_v1_Oncology
CTSH_P09668_OID20113_v1_Cardiometabolic
CTSL_P07711_OID20228_v1_Cardiometabolic
CTSO_P43234_OID20660_v1_Inflammation
CTSS_P25774_OID21056_v1_Neurology
CTSV_O60911_OID21405_v1_Oncology
CTSZ_Q9UBR2_OID20365_v1_Cardiometabolic
CUZD1_Q86UP6_OID30914_v1_Neurology_II
CWC15_Q9P013_OID31479_v1_Oncology_II
CX3CL1_P78423_OID20976_v1_Neurology
CXADR_P78310_OID20561_v1_Inflammation
CXCL1_P09341_OID20762_v1_Inflammation
CXCL10_P02778_OID20697_v1_Inflammation
CXCL11_O14625_OID21042_v1_Neurology
CXCL12_P48061_OID20464_v1_Inflammation
CXCL13_O43927_OID21024_v1_Neurology
CXCL14_O95715_OID20458_v1_Inflammation
CXCL16_Q9H2A7_OID20282_v1_Cardiometabolic
CXCL17_Q6UXB2_OID20622_v1_Inflammation
CXCL3_P19876_OID20788_v1_Inflammation
CXCL5_P42830_OID20207_v1_Cardiometabolic
CXCL6_P80162_OID20613_v1_Inflammation
CXCL8_P10145_OID20153_v1_Cardiometabolic
CXCL8_P10145_OID20631_v1_Inflammation
CXCL8_P10145_OID20997_v1_Neurology
CXCL8_P10145_OID21430_v1_Oncology
CXCL9_Q07325_OID20675_v1_Inflammation
CYB5A_P00167_OID31171_v1_Oncology_II
CYB5R2_Q6BCY4_OID31512_v1_Oncology_II
CYP24A1_Q07973_OID30091_v1_Cardiometabolic_II
CYTH3_O43739_OID31208_v1_Oncology_II
CYTL1_Q9NRR1_OID30374_v1_Cardiometabolic_II
DAAM1_Q9Y4D1_OID30664_v1_Inflammation_II
DAB2_P98082_OID21428_v1_Oncology
DAG1_Q14118_OID20774_v1_Inflammation
DAND5_Q8N907_OID30420_v1_Inflammation_II
DAPK2_Q9UIK4_OID30505_v1_Inflammation_II
DAPP1_Q9UN19_OID20524_v1_Inflammation
DARS1_P14868_OID20903_v1_Neurology
DBH_P09172_OID30703_v1_Inflammation_II
DBI_P07108_OID21143_v1_Neurology
DBN1_Q16643_OID30549_v1_Inflammation_II
DBNL_Q9UJU6_OID20681_v1_Inflammation
DCBLD2_Q96PD2_OID21474_v1_Oncology
DCC_P43146_OID30953_v1_Neurology_II
DCDC2C_A8MYV0_OID31235_v1_Oncology_II
DCLRE1C_Q96SD1_OID31240_v1_Oncology_II
DCN_P07585_OID20106_v1_Cardiometabolic
DCTD_P32321_OID30657_v1_Inflammation_II
DCTN1_Q14203_OID21399_v1_Oncology
DCTN2_Q13561_OID21334_v1_Oncology
DCTN6_O00399_OID20879_v1_Neurology
DCTPP1_Q9H773_OID20148_v1_Cardiometabolic
DCUN1D1_Q96GG9_OID30830_v1_Neurology_II
DCUN1D2_Q6PH85_OID31231_v1_Oncology_II
DCXR_Q7Z4W1_OID21480_v1_Oncology
DDA1_Q9BW61_OID30126_v1_Cardiometabolic_II
DDAH1_O94760_OID21299_v1_Oncology
DDC_P20711_OID20215_v1_Cardiometabolic
DDHD2_O94830_OID31043_v1_Neurology_II
DDI2_Q5TDH0_OID30602_v1_Inflammation_II
DDR1_Q08345_OID21009_v1_Neurology
DDT_P30046_OID30372_v1_Cardiometabolic_II
DDX1_Q92499_OID31518_v1_Oncology_II
DDX25_Q9UHL0_OID30892_v1_Neurology_II
DDX39A_O00148_OID30494_v1_Inflammation_II
DDX4_Q9NQI0_OID30431_v1_Inflammation_II
DDX53_Q86TM3_OID30944_v1_Neurology_II
DECR1_Q16698_OID20579_v1_Inflammation
DEFA1_DEFA1B_P59665_OID20344_v1_Cardiometabolic
DEFB103A_DEFB103B_P81534_OID30534_v1_Inflammation_II
DEFB104A_DEFB104B_Q8WTQ1_OID30849_v1_Neurology_II
DEFB116_Q30KQ4_OID30823_v1_Neurology_II
DEFB118_Q96PH6_OID30858_v1_Neurology_II
DEFB4A_DEFB4B_O15263_OID21373_v1_Oncology
DENND2B_P78524_OID30050_v1_Cardiometabolic_II
DENR_O43583_OID30493_v1_Inflammation_II
DFFA_O00273_OID20620_v1_Inflammation
DGCR6_Q14129_OID30859_v1_Neurology_II
DGKA_P23743_OID30546_v1_Inflammation_II
DGKZ_Q13574_OID20466_v1_Inflammation
DHODH_Q02127_OID30137_v1_Cardiometabolic_II
DHPS_P49366_OID31357_v1_Oncology_II
DHRS4L2_Q6PKH6_OID31072_v1_Neurology_II
DIABLO_Q9NR28_OID20184_v1_Cardiometabolic
DIPK1C_Q0P6D2_OID30932_v1_Neurology_II
DIPK2B_Q9H7Y0_OID30582_v1_Inflammation_II
DKK1_O94907_OID21066_v1_Neurology
DKK3_Q9UBP4_OID20264_v1_Cardiometabolic
DKK4_Q9UBT3_OID20934_v1_Neurology
DKKL1_Q9UK85_OID21313_v1_Oncology
DLG4_P78352_OID31071_v1_Neurology_II
DLGAP5_Q15398_OID30976_v1_Neurology_II
DLK1_P80370_OID20295_v1_Cardiometabolic
DLL1_O00548_OID21525_v1_Oncology
DLL4_Q9NR61_OID30255_v1_Cardiometabolic_II
DMD_P11532_OID30223_v1_Cardiometabolic_II
DMP1_Q13316_OID30213_v1_Cardiometabolic_II
DNAJA1_P31689_OID31204_v1_Oncology_II
DNAJA2_O60884_OID20627_v1_Inflammation
DNAJA4_Q8WW22_OID31130_v1_Neurology_II
DNAJB1_P25685_OID21363_v1_Oncology
DNAJB14_Q8TBM8_OID31434_v1_Oncology_II
DNAJB2_P25686_OID30661_v1_Inflammation_II
DNAJB6_O75190_OID30613_v1_Inflammation_II
DNAJB8_Q8NHS0_OID20093_v1_Cardiometabolic
DNAJC21_Q5F1R6_OID31104_v1_Neurology_II
DNAJC6_O75061_OID30247_v1_Cardiometabolic_II
DNAJC9_Q8WXX5_OID31472_v1_Oncology_II
DNER_Q8NFT8_OID20712_v1_Inflammation
DNLZ_Q5SXM8_OID30822_v1_Neurology_II
DNM1_Q05193_OID31458_v1_Oncology_II
DNM3_Q9UQ16_OID31000_v1_Neurology_II
DNMBP_Q6XZF7_OID20956_v1_Neurology
DNPEP_Q9ULA0_OID31118_v1_Neurology_II
DNPH1_O43598_OID20744_v1_Inflammation
DOC2B_Q14184_OID30927_v1_Neurology_II
DOCK9_Q9BZ29_OID30836_v1_Neurology_II
DOK1_Q99704_OID31111_v1_Neurology_II
DOK2_O60496_OID20138_v1_Cardiometabolic
DPEP1_P16444_OID20897_v1_Neurology
DPEP2_Q9H4A9_OID21305_v1_Oncology
DPP10_Q8N608_OID20527_v1_Inflammation
DPP4_P27487_OID20406_v1_Cardiometabolic
DPP6_P42658_OID21354_v1_Oncology
DPP7_Q9UHL4_OID20142_v1_Cardiometabolic
DPT_Q07507_OID20278_v1_Cardiometabolic
DPY30_Q9C005_OID21410_v1_Oncology
DRAXIN_Q8NBI3_OID20917_v1_Neurology
DRG2_P55039_OID21335_v1_Oncology
DSC2_Q02487_OID21079_v1_Neurology
DSCAM_O60469_OID30993_v1_Neurology_II
DSG2_Q14126_OID21113_v1_Neurology
DSG3_P32926_OID21460_v1_Oncology
DSG4_Q86SJ6_OID21325_v1_Oncology
DTD1_Q8TEA8_OID30580_v1_Inflammation_II
DTNB_O60941_OID31395_v1_Oncology_II
DTX2_Q86UW9_OID30882_v1_Neurology_II
DTX3_Q8N9I9_OID21349_v1_Oncology
DTYMK_P23919_OID30308_v1_Cardiometabolic_II
DUOX2_Q9NRD8_OID20059_v1_Cardiometabolic
DUSP29_Q68J44_OID30935_v1_Neurology_II
DUSP3_P51452_OID20827_v1_Neurology
DUT_P33316_OID31457_v1_Oncology_II
DXO_O77932_OID31080_v1_Neurology_II
DYNC1H1_Q14204_OID31341_v1_Oncology_II
DYNLT1_P63172_OID30925_v1_Neurology_II
DYNLT3_P51808_OID31415_v1_Oncology_II
EBAG9_O00559_OID20918_v1_Neurology
EBI3_IL27_Q14213_Q8NEV9_OID21389_v1_Oncology
ECE1_P42892_OID20891_v1_Neurology
ECHDC3_Q96DC8_OID30293_v1_Cardiometabolic_II
ECHS1_P30084_OID30239_v1_Cardiometabolic_II
ECI2_O75521_OID30142_v1_Cardiometabolic_II
ECM1_Q16610_OID30736_v1_Inflammation_II
ECSCR_Q19T08_OID30831_v1_Neurology_II
EDA2R_Q9HAV5_OID21451_v1_Oncology
EDAR_Q9UNE0_OID20525_v1_Inflammation
EDDM3B_P56851_OID31365_v1_Oncology_II
EDEM2_Q9BV94_OID30136_v1_Cardiometabolic_II
EDF1_O60869_OID31010_v1_Neurology_II
EDIL3_O43854_OID20081_v1_Cardiometabolic
EDN1_P05305_OID30224_v1_Cardiometabolic_II
EDNRB_P24530_OID30421_v1_Inflammation_II
EEF1D_P29692_OID30335_v1_Cardiometabolic_II
EFCAB14_O75071_OID31460_v1_Oncology_II
EFCAB2_Q5VUJ9_OID31313_v1_Oncology_II
EFEMP1_Q12805_OID20414_v1_Cardiometabolic
EFHD1_Q9BUP0_OID31044_v1_Neurology_II
EFNA1_P20827_OID21125_v1_Neurology
EFNA4_P52798_OID20935_v1_Neurology
EFNB2_P52799_OID30954_v1_Neurology_II
EGF_P01133_OID20698_v1_Inflammation
EGFL7_Q9UHF1_OID21252_v1_Oncology
EGFLAM_Q63HQ2_OID31496_v1_Oncology_II
EGFR_P00533_OID20319_v1_Cardiometabolic
EGLN1_Q9GZT9_OID20572_v1_Inflammation
EHBP1_Q8NDI1_OID30302_v1_Cardiometabolic_II
EHD3_Q9NZN3_OID30229_v1_Cardiometabolic_II
EIF1AX_P47813_OID31125_v1_Neurology_II
EIF2AK2_P19525_OID31442_v1_Oncology_II
EIF2AK3_Q9NZJ5_OID30060_v1_Cardiometabolic_II
EIF2S2_P20042_OID30270_v1_Cardiometabolic_II
EIF4B_P23588_OID21000_v1_Neurology
EIF4E_P06730_OID30557_v1_Inflammation_II
EIF4EBP1_Q13541_OID20162_v1_Cardiometabolic
EIF4G1_Q04637_OID20625_v1_Inflammation
EIF4G3_O43432_OID31022_v1_Neurology_II
EIF5_P55010_OID30156_v1_Cardiometabolic_II
EIF5A_P63241_OID20423_v1_Inflammation
ELAC1_Q9H777_OID31029_v1_Neurology_II
ELAVL4_P26378_OID30854_v1_Neurology_II
ELN_P15502_OID30301_v1_Cardiometabolic_II
ELOA_Q14241_OID21337_v1_Oncology
ELOB_Q15370_OID30127_v1_Cardiometabolic_II
ENAH_Q8N8S7_OID20497_v1_Inflammation
ENDOU_P21128_OID31498_v1_Oncology_II
ENG_P17813_OID20287_v1_Cardiometabolic
ENO1_P06733_OID21037_v1_Neurology
ENO2_P09104_OID21046_v1_Neurology
ENO3_P13929_OID30209_v1_Cardiometabolic_II
ENOPH1_Q9UHY7_OID31349_v1_Oncology_II
ENOX2_Q16206_OID30152_v1_Cardiometabolic_II
ENPEP_Q07075_OID30135_v1_Cardiometabolic_II
ENPP2_Q13822_OID20288_v1_Cardiometabolic
ENPP5_Q9UJA9_OID20736_v1_Inflammation
ENPP6_Q6UWR7_OID30273_v1_Cardiometabolic_II
ENPP7_Q6UWV6_OID20689_v1_Inflammation
ENSA_O43768_OID31355_v1_Oncology_II
ENTPD2_Q9Y5L3_OID21260_v1_Oncology
ENTPD5_O75356_OID20104_v1_Cardiometabolic
ENTPD6_O75354_OID20100_v1_Cardiometabolic
ENTR1_Q96C92_OID30231_v1_Cardiometabolic_II
EP300_Q09472_OID30438_v1_Inflammation_II
EPB41L5_Q9HCM4_OID30886_v1_Neurology_II
EPCAM_P16422_OID20743_v1_Inflammation
EPGN_Q6UW88_OID31373_v1_Oncology_II
EPHA1_P21709_OID20677_v1_Inflammation
EPHA10_Q5JZY3_OID20840_v1_Neurology
EPHA2_P29317_OID21342_v1_Oncology
EPHA4_P54764_OID30622_v1_Inflammation_II
EPHB4_P54760_OID20242_v1_Cardiometabolic
EPHB6_O15197_OID20982_v1_Neurology
EPHX2_P34913_OID20119_v1_Cardiometabolic
EPN1_Q9Y6I3_OID31252_v1_Oncology_II
EPO_P01588_OID20522_v1_Inflammation
EPPK1_P58107_OID30250_v1_Cardiometabolic_II
EPS8L2_Q9H6S3_OID21397_v1_Oncology
ERBB2_P04626_OID21520_v1_Oncology
ERBB3_P21860_OID20705_v1_Inflammation
ERBB4_Q15303_OID21510_v1_Oncology
ERBIN_Q96RT1_OID21323_v1_Oncology
ERC2_O15083_OID30880_v1_Neurology_II
ERCC1_P07992_OID31223_v1_Oncology_II
EREG_O14944_OID20905_v1_Neurology
ERI1_Q8IV48_OID31317_v1_Oncology_II
ERMAP_Q96PL5_OID30539_v1_Inflammation_II
ERN1_O75460_OID31391_v1_Oncology_II
ERP29_P30040_OID30578_v1_Inflammation_II
ERP44_Q9BS26_OID21338_v1_Oncology
ERVV-1_B6SEH8_OID30094_v1_Cardiometabolic_II
ESAM_Q96AP7_OID20270_v1_Cardiometabolic
ESM1_Q9NQ30_OID20758_v1_Inflammation
ESPL1_Q14674_OID31176_v1_Oncology_II
ESR1_P03372_OID30434_v1_Inflammation_II
ESYT2_A0FGR8_OID31134_v1_Neurology_II
EVI2B_P34910_OID31227_v1_Oncology_II
EVI5_O60447_OID30519_v1_Inflammation_II
EVPL_Q92817_OID31309_v1_Oncology_II
EXOSC10_Q01780_OID30083_v1_Cardiometabolic_II
EXTL1_Q92935_OID30114_v1_Cardiometabolic_II
EZR_P15311_OID21017_v1_Neurology
F10_P00742_OID30684_v1_Inflammation_II
F11_P03951_OID30773_v1_Inflammation_II
F11R_Q9Y624_OID21151_v1_Neurology
F12_P00748_OID30739_v1_Inflammation_II
F13B_P05160_OID30781_v1_Inflammation_II
F2_P00734_OID30723_v1_Inflammation_II
F2R_P25116_OID20691_v1_Inflammation
F3_P13726_OID21440_v1_Oncology
F7_P08709_OID20372_v1_Cardiometabolic
F9_P00740_OID20349_v1_Cardiometabolic
FABP1_P07148_OID20778_v1_Inflammation
FABP2_P12104_OID20200_v1_Cardiometabolic
FABP3_P05413_OID30351_v1_Cardiometabolic_II
FABP4_P15090_OID20245_v1_Cardiometabolic
FABP5_Q01469_OID21043_v1_Neurology
FABP6_P51161_OID20076_v1_Cardiometabolic
FABP9_Q0Z7S8_OID20501_v1_Inflammation
FADD_Q13158_OID20151_v1_Cardiometabolic
FAM13A_O94988_OID31463_v1_Oncology_II
FAM171A2_A8MVW0_OID31005_v1_Neurology_II
FAM171B_Q6P995_OID31338_v1_Oncology_II
FAM20A_Q96MK3_OID30348_v1_Cardiometabolic_II
FAM3B_P58499_OID21372_v1_Oncology
FAM3C_Q92520_OID20233_v1_Cardiometabolic
FAM3D_Q96BQ1_OID31514_v1_Oncology_II
FAP_Q12884_OID20330_v1_Cardiometabolic
FARSA_Q9Y285_OID30887_v1_Neurology_II
FAS_P25445_OID20316_v1_Cardiometabolic
FASLG_P48023_OID20665_v1_Inflammation
FBLN2_P98095_OID30378_v1_Cardiometabolic_II
FBN2_P35556_OID30974_v1_Neurology_II
FBP1_P09467_OID20227_v1_Cardiometabolic
FCAMR_Q8WWV6_OID30332_v1_Cardiometabolic_II
FCAR_P24071_OID20564_v1_Inflammation
FCER1A_P12319_OID30992_v1_Neurology_II
FCER2_P06734_OID21133_v1_Neurology
FCGR2A_P12318_OID20391_v1_Cardiometabolic
FCGR2B_P31994_OID21215_v1_Oncology
FCGR3B_O75015_OID20387_v1_Cardiometabolic
FCN1_O00602_OID30690_v1_Inflammation_II
FCN2_Q15485_OID20382_v1_Cardiometabolic
FCRL1_Q96LA6_OID20172_v1_Cardiometabolic
FCRL2_Q96LA5_OID20639_v1_Inflammation
FCRL3_Q96P31_OID20443_v1_Inflammation
FCRL5_Q96RD9_OID21111_v1_Neurology
FCRL6_Q6DN72_OID20529_v1_Inflammation
FCRLB_Q6BAA4_OID21193_v1_Oncology
FDX1_P10109_OID30078_v1_Cardiometabolic_II
FDX2_Q6P4F2_OID30147_v1_Cardiometabolic_II
FEN1_P39748_OID21192_v1_Oncology
FES_P07332_OID21207_v1_Oncology
FETUB_Q9UGM5_OID20404_v1_Cardiometabolic
FGA_P02671_OID30788_v1_Inflammation_II
FGD3_Q5JSP0_OID31040_v1_Neurology_II
FGF12_P61328_OID30454_v1_Inflammation_II
FGF16_O43320_OID30535_v1_Inflammation_II
FGF19_O95750_OID20715_v1_Inflammation
FGF2_P09038_OID20503_v1_Inflammation
FGF20_Q9NP95_OID30459_v1_Inflammation_II
FGF21_Q9NSA1_OID21402_v1_Oncology
FGF23_Q9GZV9_OID21411_v1_Oncology
FGF3_P11487_OID30544_v1_Inflammation_II
FGF5_P12034_OID20490_v1_Inflammation
FGF6_P10767_OID30443_v1_Inflammation_II
FGF7_P21781_OID31241_v1_Oncology_II
FGF9_P31371_OID31193_v1_Oncology_II
FGFBP1_Q14512_OID21507_v1_Oncology
FGFBP2_Q9BYJ0_OID30395_v1_Cardiometabolic_II
FGFBP3_Q8TAT2_OID31108_v1_Neurology_II
FGFR2_P21802_OID21478_v1_Oncology
FGFR4_P22455_OID30646_v1_Inflammation_II
FGL1_Q08830_OID30702_v1_Inflammation_II
FGR_P09769_OID20828_v1_Neurology
FH_P07954_OID30839_v1_Neurology_II
FHIP2A_Q5W0V3_OID30187_v1_Cardiometabolic_II
FHIT_P49789_OID20872_v1_Neurology
FIS1_Q9Y3D6_OID20722_v1_Inflammation
FKBP14_Q9NWM8_OID31065_v1_Neurology_II
FKBP1B_P68106_OID20618_v1_Inflammation
FKBP4_Q02790_OID20960_v1_Neurology
FKBP5_Q13451_OID20937_v1_Neurology
FKBP7_Q9Y680_OID20846_v1_Neurology
FKBPL_Q9UIM3_OID31499_v1_Oncology_II
FLI1_Q01543_OID21239_v1_Oncology
FLRT2_O43155_OID20946_v1_Neurology
FLT1_P17948_OID21301_v1_Oncology
FLT3_P36888_OID21272_v1_Oncology
FLT3LG_P49771_OID20661_v1_Inflammation
FLT4_P35916_OID21491_v1_Oncology
FMNL1_O95466_OID20884_v1_Neurology
FMR1_Q06787_OID21233_v1_Oncology
FN1_P02751_OID30787_v1_Inflammation_II
FNDC1_Q4ZHG4_OID31127_v1_Neurology_II
FNTA_P49354_OID31381_v1_Oncology_II
FOLH1_Q04609_OID30430_v1_Inflammation_II
FOLR1_P15328_OID21529_v1_Oncology
FOLR2_P14207_OID21062_v1_Neurology
FOLR3_P41439_OID21485_v1_Oncology
FOS_P01100_OID31221_v1_Oncology_II
FOSB_P53539_OID20791_v1_Neurology
FOXJ3_Q9UPW0_OID30445_v1_Inflammation_II
FOXO1_Q12778_OID20515_v1_Inflammation
FOXO3_O43524_OID21271_v1_Oncology
FRMD4B_Q9Y2L6_OID30155_v1_Cardiometabolic_II
FRMD7_Q6ZUT3_OID30898_v1_Neurology_II
FRZB_Q92765_OID20968_v1_Neurology
FSHB_P01225_OID30233_v1_Cardiometabolic_II
FST_P19883_OID20770_v1_Inflammation
FSTL1_Q12841_OID30254_v1_Cardiometabolic_II
FSTL3_O95633_OID20782_v1_Inflammation
FTCD_O95954_OID31137_v1_Neurology_II
FUCA1_P04066_OID20261_v1_Cardiometabolic
FUOM_A2VDF0_OID30626_v1_Inflammation_II
FURIN_P09958_OID21514_v1_Oncology
FUS_P35637_OID21256_v1_Oncology
FUT1_P19526_OID31295_v1_Oncology_II
FUT3_FUT5_P21217_Q11128_OID21013_v1_Neurology
FUT8_Q9BYC5_OID20992_v1_Neurology
FXN_Q16595_OID21442_v1_Oncology
FXYD5_Q96DB9_OID20463_v1_Inflammation
FYB1_O15117_OID21140_v1_Neurology
FZD10_Q9ULW2_OID30931_v1_Neurology_II
FZD8_Q9H461_OID30818_v1_Neurology_II
GABARAP_O95166_OID31414_v1_Oncology_II
GABARAPL1_Q9H0R8_OID31253_v1_Oncology_II
GABRA4_P48169_OID30803_v1_Neurology_II
GAD1_Q99259_OID31166_v1_Oncology_II
GAD2_Q05329_OID30449_v1_Inflammation_II
GADD45B_O75293_OID31261_v1_Oncology_II
GADD45GIP1_Q8TAE8_OID30237_v1_Cardiometabolic_II
GAGE2A_Q6NT46_OID31199_v1_Oncology_II
GAL_P22466_OID20727_v1_Inflammation
GALNT10_Q86SR1_OID21371_v1_Oncology
GALNT2_Q10471_OID21423_v1_Oncology
GALNT3_Q14435_OID20471_v1_Inflammation
GALNT5_Q7Z7M9_OID30295_v1_Cardiometabolic_II
GALNT7_Q86SF2_OID21377_v1_Oncology
GAMT_Q14353_OID30133_v1_Cardiometabolic_II
GAPDH_P04406_OID30600_v1_Inflammation_II
GART_P22102_OID31004_v1_Neurology_II
GAS2_O43903_OID31285_v1_Oncology_II
GAS6_Q14393_OID20318_v1_Cardiometabolic
GASK1A_Q9UFP1_OID30109_v1_Cardiometabolic_II
GAST_P01350_OID31083_v1_Neurology_II
GATA3_P23771_OID31219_v1_Oncology_II
GATD3_P0DPI2_OID30253_v1_Cardiometabolic_II
GBP1_P32455_OID31128_v1_Neurology_II
GBP2_P32456_OID20489_v1_Inflammation
GBP4_Q96PP9_OID20845_v1_Neurology
GBP6_Q6ZN66_OID30139_v1_Cardiometabolic_II
GC_P02774_OID30780_v1_Inflammation_II
GCC1_Q96CN9_OID31147_v1_Neurology_II
GCG_P01275_OID21263_v1_Oncology
GCHFR_P30047_OID30631_v1_Inflammation_II
GCLM_P48507_OID30059_v1_Cardiometabolic_II
GCNT1_Q02742_OID21379_v1_Oncology
GDF15_Q99988_OID20251_v1_Cardiometabolic
GDF2_Q9UK05_OID20202_v1_Cardiometabolic
GDNF_P39905_OID20861_v1_Neurology
GET3_O43681_OID30303_v1_Cardiometabolic_II
GFAP_P14136_OID21247_v1_Oncology
GFER_P55789_OID21259_v1_Oncology
GFOD2_Q3B7J2_OID21216_v1_Oncology
GFRA1_P56159_OID21457_v1_Oncology
GFRA2_O00451_OID21330_v1_Oncology
GFRA3_O60609_OID20933_v1_Neurology
GFRAL_Q6UXV0_OID31091_v1_Neurology_II
GGA1_Q9UJY5_OID20838_v1_Neurology
GGACT_Q9BVM4_OID30290_v1_Cardiometabolic_II
GGCT_O75223_OID30304_v1_Cardiometabolic_II
GGH_Q92820_OID20416_v1_Cardiometabolic
GGT1_P19440_OID21075_v1_Neurology
GGT5_P36269_OID20909_v1_Neurology
GH1_P01241_OID20220_v1_Cardiometabolic
GH2_P01242_OID21168_v1_Oncology
GHR_P10912_OID30574_v1_Inflammation_II
GHRHR_Q02643_OID20841_v1_Neurology
GHRL_Q9UBU3_OID20175_v1_Cardiometabolic
GID8_Q9NWU2_OID31041_v1_Neurology_II
GIGYF2_Q6Y7W6_OID31062_v1_Neurology_II
GIMAP7_Q8NHV1_OID30639_v1_Inflammation_II
GIMAP8_Q8ND71_OID31194_v1_Oncology_II
GIP_P09681_OID30288_v1_Cardiometabolic_II
GIPC2_Q8TF65_OID31153_v1_Neurology_II
GIPC3_Q8TF64_OID31507_v1_Oncology_II
GIPR_P48546_OID30542_v1_Inflammation_II
GIT1_Q9Y2X7_OID30533_v1_Inflammation_II
GJA8_P48165_OID31187_v1_Oncology_II
GKN1_Q9NS71_OID20885_v1_Neurology
GLA_P06280_OID30594_v1_Inflammation_II
GLB1_P16278_OID20949_v1_Neurology
GLI2_P10070_OID30429_v1_Inflammation_II
GLO1_Q04760_OID20107_v1_Cardiometabolic
GLOD4_Q9HC38_OID20710_v1_Inflammation
GLP1R_P43220_OID30809_v1_Neurology_II
GLRX_P35754_OID20195_v1_Cardiometabolic
GLRX5_Q86SX6_OID30663_v1_Inflammation_II
GLT8D2_Q9H1C3_OID20825_v1_Neurology
GLYR1_Q49A26_OID31364_v1_Oncology_II
GM2A_P17900_OID30413_v1_Cardiometabolic_II
GMFG_O60234_OID30340_v1_Cardiometabolic_II
GMPR_P36959_OID20641_v1_Inflammation
GMPR2_Q9P2T1_OID30623_v1_Inflammation_II
GNAS_O95467_OID31008_v1_Neurology_II
GNE_Q9Y223_OID21231_v1_Oncology
GNGT1_P63211_OID30920_v1_Neurology_II
GNLY_P22749_OID21132_v1_Neurology
GNPDA1_P46926_OID30197_v1_Cardiometabolic_II
GNPDA2_Q8TDQ7_OID30597_v1_Inflammation_II
GOLGA3_Q08378_OID31026_v1_Neurology_II
GOLM2_Q6P4E1_OID21044_v1_Neurology
GOPC_Q9HD26_OID20551_v1_Inflammation
GORASP2_Q9H8Y8_OID31438_v1_Oncology_II
GOT1_P17174_OID30417_v1_Cardiometabolic_II
GP1BA_P07359_OID20381_v1_Cardiometabolic
GP1BB_P13224_OID30174_v1_Cardiometabolic_II
GP2_P55259_OID20090_v1_Cardiometabolic
GP5_P40197_OID30611_v1_Inflammation_II
GP6_Q9HCN6_OID21091_v1_Neurology
GPA33_Q99795_OID21376_v1_Oncology
GPC1_P35052_OID21438_v1_Oncology
GPC5_P78333_OID20944_v1_Neurology
GPD1_P21695_OID31358_v1_Oncology_II
GPHA2_Q96T91_OID31437_v1_Oncology_II
GPI_P06744_OID30680_v1_Inflammation_II
GPIHBP1_Q8IV16_OID31469_v1_Oncology_II
GPKOW_Q92917_OID20890_v1_Neurology
GPNMB_Q14956_OID20173_v1_Cardiometabolic
GPR101_Q96P66_OID30819_v1_Neurology_II
GPR158_Q5T848_OID31013_v1_Neurology_II
GPR37_O15354_OID20095_v1_Cardiometabolic
GPRC5C_Q9NQ84_OID31340_v1_Oncology_II
GRAP2_O75791_OID20192_v1_Cardiometabolic
GRHPR_Q9UBQ7_OID30289_v1_Cardiometabolic_II
GRIK2_Q13002_OID30977_v1_Neurology_II
GRIN2B_Q13224_OID30802_v1_Neurology_II
GRK5_P34947_OID20066_v1_Cardiometabolic
GRN_P28799_OID21159_v1_Neurology
GRP_P07492_OID30264_v1_Cardiometabolic_II
GRPEL1_Q9HAV7_OID21309_v1_Oncology
GRSF1_Q12849_OID31224_v1_Oncology_II
GSAP_A4D1B5_OID21173_v1_Oncology
GSN_P06396_OID30714_v1_Inflammation_II
GSR_P00390_OID30700_v1_Inflammation_II
GSTA1_P08263_OID20166_v1_Cardiometabolic
GSTA3_Q16772_OID21242_v1_Oncology
GSTM4_Q03013_OID30164_v1_Cardiometabolic_II
GSTP1_P09211_OID20876_v1_Neurology
GSTT2B_P0CG30_OID31097_v1_Neurology_II
GTF2IRD1_Q9UHL9_OID31264_v1_Oncology_II
GTPBP2_Q9BX10_OID30946_v1_Neurology_II
GUCA2A_Q02747_OID21101_v1_Neurology
GUCY2C_P25092_OID31318_v1_Oncology_II
GUK1_Q16774_OID30148_v1_Cardiometabolic_II
GUSB_P08236_OID20296_v1_Cardiometabolic
GYS1_P13807_OID20097_v1_Cardiometabolic
GZMA_P12544_OID20663_v1_Inflammation
GZMB_P10144_OID20604_v1_Inflammation
GZMH_P20718_OID20096_v1_Cardiometabolic
H2AP_O75409_OID31232_v1_Oncology_II
HADH_Q16836_OID30132_v1_Cardiometabolic_II
HAGH_Q16775_OID21459_v1_Oncology
HAO1_Q9UJM8_OID21395_v1_Oncology
HARS1_P12081_OID21086_v1_Neurology
HAVCR1_Q96D42_OID21422_v1_Oncology
HAVCR2_Q8TDQ0_OID21137_v1_Neurology
HBEGF_Q99075_OID21465_v1_Oncology
HBQ1_P09105_OID21433_v1_Oncology
HBZ_P02008_OID30307_v1_Cardiometabolic_II
HCG22_E2RYF7_OID30088_v1_Cardiometabolic_II
HCLS1_P14317_OID20648_v1_Inflammation
HDAC8_Q9BY41_OID30436_v1_Inflammation_II
HDAC9_Q9UKV0_OID30832_v1_Neurology_II
HDDC2_Q7Z4H3_OID31447_v1_Oncology_II
HDGF_P51858_OID21455_v1_Oncology
HDGFL2_Q7Z4V5_OID31136_v1_Neurology_II
HEBP1_Q9NRV9_OID20063_v1_Cardiometabolic
HEG1_Q9ULI3_OID30579_v1_Inflammation_II
HEPACAM2_A8MVW5_OID31151_v1_Neurology_II
HEPH_Q9BQS7_OID30337_v1_Cardiometabolic_II
HEXIM1_O94992_OID20589_v1_Inflammation
HGF_P14210_OID20656_v1_Inflammation
HGFAC_Q04756_OID30718_v1_Inflammation_II
HGS_O14964_OID21175_v1_Oncology
HHEX_Q03014_OID31107_v1_Neurology_II
HIF1A_Q16665_OID30425_v1_Inflammation_II
HIP1_O00291_OID30071_v1_Cardiometabolic_II
HIP1R_O75146_OID31141_v1_Neurology_II
HJV_Q6ZVN8_OID31006_v1_Neurology_II
HK2_P52789_OID20065_v1_Cardiometabolic
HLA-A_P04439_OID31048_v1_Neurology_II
HLA-DRA_P01903_OID20520_v1_Inflammation
HLA-E_P13747_OID20532_v1_Inflammation
HMBS_P08397_OID21385_v1_Oncology
HMCN2_Q8NDA2_OID30592_v1_Inflammation_II
HMGCL_P35914_OID30214_v1_Cardiometabolic_II
HMGCS1_Q01581_OID30157_v1_Cardiometabolic_II
HMMR_O75330_OID31175_v1_Oncology_II
HMOX1_P09601_OID20217_v1_Cardiometabolic
HMOX2_P30519_OID20887_v1_Neurology
HNF1A_P20823_OID30919_v1_Neurology_II
HNMT_P50135_OID20975_v1_Neurology
HNRNPK_P61978_OID20051_v1_Cardiometabolic
HNRNPUL1_Q9BUJ2_OID31037_v1_Neurology_II
HPCAL1_P37235_OID20615_v1_Inflammation
HPGDS_O60760_OID21266_v1_Oncology
HPSE_Q9Y251_OID30409_v1_Cardiometabolic_II
HRAS_P01112_OID31263_v1_Oncology_II
HRC_P23327_OID30211_v1_Cardiometabolic_II
HRG_P04196_OID30770_v1_Inflammation_II
HS1BP3_Q53T59_OID30243_v1_Cardiometabolic_II
HS3ST3B1_Q9Y662_OID21303_v1_Oncology
HS6ST1_O60243_OID21441_v1_Oncology
HS6ST2_Q96MM7_OID30481_v1_Inflammation_II
HSBP1_O75506_OID30232_v1_Cardiometabolic_II
HSD11B1_P28845_OID20575_v1_Inflammation
HSD17B14_Q9BPX1_OID31098_v1_Neurology_II
HSD17B3_P37058_OID30145_v1_Cardiometabolic_II
HSDL2_Q6YN16_OID30256_v1_Cardiometabolic_II
HSP90B1_P14625_OID20829_v1_Neurology
HSPA1A_P0DMV8_OID20718_v1_Inflammation
HSPA2_P54652_OID31424_v1_Oncology_II
HSPB1_P04792_OID20230_v1_Cardiometabolic
HSPB6_O14558_OID21408_v1_Oncology
HSPG2_P98160_OID20383_v1_Cardiometabolic
HTR1A_P08908_OID30824_v1_Neurology_II
HTR1B_P28222_OID30866_v1_Neurology_II
HTRA2_O43464_OID21471_v1_Oncology
HYAL1_Q12794_OID20357_v1_Cardiometabolic
HYOU1_Q9Y4L1_OID20300_v1_Cardiometabolic
ICA1_Q05084_OID20484_v1_Inflammation
ICAM1_P05362_OID20411_v1_Cardiometabolic
ICAM2_P13598_OID20248_v1_Cardiometabolic
ICAM3_P32942_OID20277_v1_Cardiometabolic
ICAM4_Q14773_OID20578_v1_Inflammation
ICAM5_Q9UMF0_OID20145_v1_Cardiometabolic
ICOSLG_O75144_OID21351_v1_Oncology
ID4_P47928_OID31284_v1_Oncology_II
IDI2_Q9BXS1_OID20823_v1_Neurology
IDO1_P14902_OID30230_v1_Cardiometabolic_II
IDO1_P14902_OID30563_v1_Inflammation_II
IDO1_P14902_OID31050_v1_Neurology_II
IDO1_P14902_OID31474_v1_Oncology_II
IDS_P22304_OID20619_v1_Inflammation
IDUA_P35475_OID21468_v1_Oncology
IFI30_P13284_OID31505_v1_Oncology_II
IFIT1_P09914_OID31310_v1_Oncology_II
IFIT3_O14879_OID31283_v1_Oncology_II
IFNAR1_P17181_OID31491_v1_Oncology_II
IFNG_P01579_OID20495_v1_Inflammation
IFNGR1_P15260_OID20678_v1_Inflammation
IFNGR2_P38484_OID20941_v1_Neurology
IFNL1_Q8IU54_OID20795_v1_Neurology
IFNL2_Q8IZJ0_OID30791_v1_Neurology_II
IFNLR1_Q8IU57_OID20506_v1_Inflammation
IFNW1_P05000_OID30129_v1_Cardiometabolic_II
IFT20_Q8IY31_OID30962_v1_Neurology_II
IGBP1_P78318_OID31059_v1_Neurology_II
IGDCC3_Q8IVU1_OID30862_v1_Neurology_II
IGDCC4_Q8TDY8_OID30402_v1_Cardiometabolic_II
IGF1R_P08069_OID21274_v1_Oncology
IGF2BP3_O00425_OID30112_v1_Cardiometabolic_II
IGF2R_P11717_OID21146_v1_Neurology
IGFBP1_P08833_OID20246_v1_Cardiometabolic
IGFBP2_P18065_OID20325_v1_Cardiometabolic
IGFBP3_P17936_OID20398_v1_Cardiometabolic
IGFBP4_P22692_OID21158_v1_Neurology
IGFBP6_P24592_OID20413_v1_Cardiometabolic
IGFBP7_Q16270_OID20236_v1_Cardiometabolic
IGFBPL1_Q8WX77_OID20155_v1_Cardiometabolic
IGFL4_Q6B9Z1_OID30500_v1_Inflammation_II
IGHMBP2_P38935_OID30123_v1_Cardiometabolic_II
IGLC2_P0DOY2_OID30740_v1_Inflammation_II
IGLON5_A6NGN9_OID31169_v1_Oncology_II
IGSF21_Q96ID5_OID30210_v1_Cardiometabolic_II
IGSF3_O75054_OID21312_v1_Oncology
IGSF8_Q969P0_OID20167_v1_Cardiometabolic
IGSF9_Q9P2J2_OID30330_v1_Cardiometabolic_II
IKBKG_Q9Y6K9_OID20544_v1_Inflammation
IKZF2_Q9UKS7_OID21213_v1_Oncology
IL10_P22301_OID20431_v1_Inflammation
IL10RA_Q13651_OID20420_v1_Inflammation
IL10RB_Q08334_OID20696_v1_Inflammation
IL11_P20809_OID20455_v1_Inflammation
IL12A_IL12B_P29459_P29460_OID21327_v1_Oncology
IL12B_P29460_OID20666_v1_Inflammation
IL12RB1_P42701_OID20486_v1_Inflammation
IL12RB2_Q99665_OID30422_v1_Inflammation_II
IL13_P35225_OID20430_v1_Inflammation
IL13RA1_P78552_OID21504_v1_Oncology
IL13RA2_Q14627_OID30841_v1_Neurology_II
IL15_P40933_OID20562_v1_Inflammation
IL15RA_Q13261_OID20498_v1_Inflammation
IL16_Q14005_OID20633_v1_Inflammation
IL17A_Q16552_OID20469_v1_Inflammation
IL17C_Q9P0M4_OID20477_v1_Inflammation
IL17D_Q8TAD2_OID20481_v1_Inflammation
IL17F_Q96PD4_OID20456_v1_Inflammation
IL17RA_Q96F46_OID21089_v1_Neurology
IL17RB_Q9NRM6_OID20585_v1_Inflammation
IL18_Q14116_OID20694_v1_Inflammation
IL18BP_O95998_OID20348_v1_Cardiometabolic
IL18R1_Q13478_OID20652_v1_Inflammation
IL18RAP_O95256_OID20900_v1_Neurology
IL19_Q9UHD0_OID20158_v1_Cardiometabolic
IL1A_P01583_OID20488_v1_Inflammation
IL1B_P01584_OID20427_v1_Inflammation
IL1R1_P14778_OID21116_v1_Neurology
IL1R2_P27930_OID20757_v1_Inflammation
IL1RAP_Q9NPH3_OID21126_v1_Neurology
IL1RL1_Q01638_OID20250_v1_Cardiometabolic
IL1RL2_Q9HB29_OID20487_v1_Inflammation
IL1RN_P18510_OID20700_v1_Inflammation
IL2_P60568_OID20419_v1_Inflammation
IL20_Q9NYY1_OID20453_v1_Inflammation
IL20RA_Q9UHF4_OID20422_v1_Inflammation
IL20RB_Q6UXL0_OID30461_v1_Inflammation_II
IL21R_Q9HBE5_OID30441_v1_Inflammation_II
IL22_Q9GZX6_OID31407_v1_Oncology_II
IL22RA1_Q8N6P7_OID20449_v1_Inflammation
IL24_Q13007_OID20440_v1_Inflammation
IL25_Q9H293_OID31243_v1_Oncology_II
IL2RA_P01589_OID20267_v1_Cardiometabolic
IL2RB_P14784_OID20450_v1_Inflammation
IL2RG_P31785_OID31361_v1_Oncology_II
IL3_P08700_OID31229_v1_Oncology_II
IL31_Q6EBC2_OID30487_v1_Inflammation_II
IL31RA_Q8NI17_OID30475_v1_Inflammation_II
IL32_P24001_OID20605_v1_Inflammation
IL33_O95760_OID20428_v1_Inflammation
IL34_Q6ZMJ4_OID20809_v1_Neurology
IL36A_Q9UHA7_OID30472_v1_Inflammation_II
IL36G_Q9NZH8_OID30551_v1_Inflammation_II
IL3RA_P26951_OID20461_v1_Inflammation
IL4_P05112_OID20426_v1_Inflammation
IL4R_P24394_OID20576_v1_Inflammation
IL5_P05113_OID20472_v1_Inflammation
IL5RA_Q01344_OID20601_v1_Inflammation
IL6_P05231_OID20101_v1_Cardiometabolic
IL6_P05231_OID20563_v1_Inflammation
IL6_P05231_OID20911_v1_Neurology
IL6_P05231_OID21276_v1_Oncology
IL6R_P08887_OID20385_v1_Cardiometabolic
IL6ST_P40189_OID20147_v1_Cardiometabolic
IL7_P13232_OID20535_v1_Inflammation
IL7R_P16871_OID21136_v1_Neurology
IL9_P15248_OID31298_v1_Oncology_II
ILKAP_Q9H0C8_OID20855_v1_Neurology
IMMT_Q16891_OID31397_v1_Oncology_II
IMPA1_P29218_OID20907_v1_Neurology
IMPACT_Q9P2X3_OID31112_v1_Neurology_II
IMPG1_Q17R60_OID30814_v1_Neurology_II
ING1_Q9UK53_OID20853_v1_Neurology
INHBB_P09529_OID30625_v1_Inflammation_II
INHBC_P55103_OID21093_v1_Neurology
INPP1_P49441_OID21345_v1_Oncology
INPP5D_Q92835_OID30259_v1_Cardiometabolic_II
INPP5J_Q15735_OID30975_v1_Neurology_II
INPPL1_O15357_OID21314_v1_Oncology
INSL3_P51460_OID31129_v1_Neurology_II
INSL4_Q14641_OID31370_v1_Oncology_II
INSL5_Q9Y5Q6_OID31448_v1_Oncology_II
INSR_P06213_OID30566_v1_Inflammation_II
IPCEF1_Q8WWN9_OID20977_v1_Neurology
IQGAP2_Q13576_OID21361_v1_Oncology
IRAG2_Q12912_OID20085_v1_Cardiometabolic
IRAK1_P51617_OID20485_v1_Inflammation
IRAK4_Q9NWZ3_OID20577_v1_Inflammation
ISLR2_Q6UXK2_OID20889_v1_Neurology
ISM1_B1AKI9_OID20538_v1_Inflammation
ISM2_Q6H9L7_OID30365_v1_Cardiometabolic_II
IST1_P53990_OID31497_v1_Oncology_II
ITGA11_Q9UKX5_OID20581_v1_Inflammation
ITGA2_P17301_OID30570_v1_Inflammation_II
ITGA5_P08648_OID21139_v1_Neurology
ITGA6_P23229_OID20528_v1_Inflammation
ITGAL_P20701_OID30537_v1_Inflammation_II
ITGAM_P11215_OID21071_v1_Neurology
ITGAV_P06756_OID21416_v1_Oncology
ITGAX_P20702_OID31325_v1_Oncology_II
ITGB1_P05556_OID20376_v1_Cardiometabolic
ITGB1BP1_O14713_OID21268_v1_Oncology
ITGB1BP2_Q9UKP3_OID20112_v1_Cardiometabolic
ITGB2_P05107_OID20315_v1_Cardiometabolic
ITGB5_P18084_OID21522_v1_Oncology
ITGB6_P18564_OID20493_v1_Inflammation
ITGB7_P26010_OID21393_v1_Oncology
ITGBL1_O95965_OID30408_v1_Cardiometabolic_II
ITIH1_P19827_OID30722_v1_Inflammation_II
ITIH3_Q06033_OID20352_v1_Cardiometabolic
ITIH4_Q14624_OID30762_v1_Inflammation_II
ITIH5_Q86UX2_OID31430_v1_Oncology_II
ITM2A_O43736_OID20504_v1_Inflammation
ITPA_Q9BY32_OID30082_v1_Cardiometabolic_II
ITPR1_Q14643_OID30216_v1_Cardiometabolic_II
ITPRIP_Q8IWB1_OID30860_v1_Neurology_II
IVD_P26440_OID20833_v1_Neurology
IZUMO1_Q8IYV9_OID31159_v1_Oncology_II
JAM2_P57087_OID21064_v1_Neurology
JAM3_Q9BX67_OID30586_v1_Inflammation_II
JCHAIN_P01591_OID20494_v1_Inflammation
JMJD1C_Q15652_OID31172_v1_Oncology_II
JPT2_Q9H910_OID31520_v1_Oncology_II
JUN_P05412_OID20424_v1_Inflammation
KAZALD1_Q96I82_OID21339_v1_Oncology
KAZN_Q674X7_OID31481_v1_Oncology_II
KCNC4_Q03721_OID30813_v1_Neurology_II
KCNH2_Q12809_OID30899_v1_Neurology_II
KCNIP4_Q6PIL6_OID20813_v1_Neurology
KCTD5_Q9NXV2_OID31148_v1_Neurology_II
KDM3A_Q9Y4C1_OID30426_v1_Inflammation_II
KDR_P35968_OID21497_v1_Oncology
KEL_P23276_OID20881_v1_Neurology
KHDC3L_Q587J8_OID31245_v1_Oncology_II
KHK_P50053_OID30241_v1_Cardiometabolic_II
KIAA0319_Q5VV43_OID31094_v1_Neurology_II
KIAA1549_Q9HCM3_OID31307_v1_Oncology_II
KIAA1549L_Q6ZVL6_OID31312_v1_Oncology_II
KIAA2013_Q8IYS2_OID31392_v1_Oncology_II
KIF1C_O43896_OID30163_v1_Cardiometabolic_II
KIF20B_Q96Q89_OID30816_v1_Neurology_II
KIF22_Q14807_OID30175_v1_Cardiometabolic_II
KIFBP_Q96EK5_OID21320_v1_Oncology
KIR2DL2_P43627_OID31431_v1_Oncology_II
KIR2DL3_P43628_OID21196_v1_Oncology
KIR2DS4_P43632_OID31432_v1_Oncology_II
KIR3DL1_P43629_OID21185_v1_Oncology
KIR3DL2_P43630_OID31191_v1_Oncology_II
KIRREL1_Q96J84_OID30806_v1_Neurology_II
KIRREL2_Q6UWL6_OID20873_v1_Neurology
KIT_P10721_OID20370_v1_Cardiometabolic
KITLG_P21583_OID20196_v1_Cardiometabolic
KLB_Q86Z14_OID20888_v1_Neurology
KLF4_O43474_OID30808_v1_Neurology_II
KLHL41_O60662_OID30986_v1_Neurology_II
KLK1_P06870_OID21499_v1_Oncology
KLK10_O43240_OID21523_v1_Oncology
KLK11_Q9UBX7_OID21518_v1_Oncology
KLK12_Q9UKR0_OID21201_v1_Oncology
KLK13_Q9UKR3_OID21291_v1_Oncology
KLK14_Q9P0G3_OID21407_v1_Oncology
KLK15_Q9H2R5_OID31427_v1_Oncology_II
KLK3_P07288_OID30364_v1_Cardiometabolic_II
KLK4_Q9Y5K2_OID21391_v1_Oncology
KLK6_Q92876_OID21526_v1_Oncology
KLK7_P49862_OID30652_v1_Inflammation_II
KLK8_O60259_OID21517_v1_Oncology
KLKB1_P03952_OID30760_v1_Inflammation_II
KLRB1_Q12918_OID20629_v1_Inflammation
KLRC1_P26715_OID30855_v1_Neurology_II
KLRD1_Q13241_OID20632_v1_Inflammation
KLRF1_Q9NZS2_OID30464_v1_Inflammation_II
KLRK1_P26718_OID31082_v1_Neurology_II
KRT14_P02533_OID20800_v1_Neurology
KRT17_Q04695_OID30092_v1_Cardiometabolic_II
KRT18_P05783_OID21296_v1_Oncology
KRT19_P08727_OID20596_v1_Inflammation
KRT5_P13647_OID20860_v1_Neurology
KRT6C_P48668_OID30169_v1_Cardiometabolic_II
KRT8_P05787_OID30865_v1_Neurology_II
KYAT1_Q16773_OID20232_v1_Cardiometabolic
KYNU_Q16719_OID20669_v1_Inflammation
L1CAM_P32004_OID21484_v1_Oncology
L3HYPDH_Q96EM0_OID30314_v1_Cardiometabolic_II
LACRT_Q9GZZ8_OID31367_v1_Oncology_II
LACTB2_Q53H82_OID20150_v1_Cardiometabolic
LAG3_P18627_OID21315_v1_Oncology
LAIR1_Q6GTX8_OID20737_v1_Inflammation
LAIR2_Q6ISS4_OID20965_v1_Neurology
LAMA1_P25391_OID30057_v1_Cardiometabolic_II
LAMA4_Q16363_OID20769_v1_Inflammation
LAMB1_P07942_OID30280_v1_Cardiometabolic_II
LAMP1_P11279_OID30416_v1_Cardiometabolic_II
LAMP2_P13473_OID21035_v1_Neurology
LAMP3_Q9UQV4_OID20638_v1_Inflammation
LAMTOR5_O43504_OID31396_v1_Oncology_II
LAP3_P28838_OID20436_v1_Inflammation
LARP1_Q6PKG0_OID31372_v1_Oncology_II
LAT_O43561_OID20640_v1_Inflammation
LAT2_Q9GZY6_OID21292_v1_Oncology
LATS1_O95835_OID30523_v1_Inflammation_II
LAYN_Q6UX15_OID20970_v1_Neurology
LBP_P18428_OID20355_v1_Cardiometabolic
LBR_Q14739_OID21034_v1_Neurology
LCAT_P04180_OID30677_v1_Inflammation_II
LCN15_Q6UWW0_OID31032_v1_Neurology_II
LCN2_P80188_OID20392_v1_Cardiometabolic
LCP1_P13796_OID30367_v1_Cardiometabolic_II
LDLR_P01130_OID20240_v1_Cardiometabolic
LDLRAP1_Q5SW96_OID31068_v1_Neurology_II
LECT2_O14960_OID30320_v1_Cardiometabolic_II
LEFTY2_O00292_OID21454_v1_Oncology
LELP1_Q5T871_OID30845_v1_Neurology_II
LEO1_Q8WVC0_OID30991_v1_Neurology_II
LEP_P41159_OID20187_v1_Cardiometabolic
LEPR_P48357_OID20128_v1_Cardiometabolic
LETM1_O95202_OID31018_v1_Neurology_II
LGALS1_P09382_OID20154_v1_Cardiometabolic
LGALS3_P17931_OID20284_v1_Cardiometabolic
LGALS3BP_Q08380_OID30765_v1_Inflammation_II
LGALS4_P56470_OID20748_v1_Inflammation
LGALS7_LGALS7B_P47929_OID21406_v1_Oncology
LGALS8_O00214_OID21041_v1_Neurology
LGALS9_O00182_OID20781_v1_Inflammation
LGMN_Q99538_OID20773_v1_Inflammation
LHB_P01229_OID21248_v1_Oncology
LHPP_Q9H008_OID20749_v1_Inflammation
LIF_P15018_OID20824_v1_Neurology
LIFR_P42702_OID20606_v1_Inflammation
LILRA2_Q8N149_OID21152_v1_Neurology
LILRA3_Q8N6C8_OID30376_v1_Cardiometabolic_II
LILRA4_P59901_OID30162_v1_Cardiometabolic_II
LILRA5_A6NI73_OID20209_v1_Cardiometabolic
LILRA6_Q6PI73_OID30346_v1_Cardiometabolic_II
LILRB1_Q8NHL6_OID20323_v1_Cardiometabolic
LILRB2_Q8N423_OID20301_v1_Cardiometabolic
LILRB4_Q8NHJ6_OID20429_v1_Inflammation
LILRB5_O75023_OID20324_v1_Cardiometabolic
LIPF_P07098_OID30266_v1_Cardiometabolic_II
LMNB1_P20700_OID31501_v1_Oncology_II
LMNB2_Q03252_OID31109_v1_Neurology_II
LMOD1_P29536_OID30212_v1_Cardiometabolic_II
LMOD1_P29536_OID30547_v1_Inflammation_II
LMOD1_P29536_OID31014_v1_Neurology_II
LMOD1_P29536_OID31416_v1_Oncology_II
LMOD2_Q6P5Q4_OID30864_v1_Neurology_II
LONP1_P36776_OID30219_v1_Cardiometabolic_II
LPA_P08519_OID30747_v1_Inflammation_II
LPCAT2_Q7L5N7_OID21290_v1_Oncology
LPL_P06858_OID20188_v1_Cardiometabolic
LPO_P22079_OID20963_v1_Neurology
LPP_Q93052_OID30190_v1_Cardiometabolic_II
LRCH4_O75427_OID30191_v1_Cardiometabolic_II
LRFN2_Q9ULH4_OID30895_v1_Neurology_II
LRG1_P02750_OID30751_v1_Inflammation_II
LRIG1_Q96JA1_OID21429_v1_Oncology
LRIG3_Q6UXM1_OID30450_v1_Inflammation_II
LRP1_Q07954_OID21293_v1_Oncology
LRP11_Q86VZ4_OID20185_v1_Cardiometabolic
LRP2_P98164_OID30960_v1_Neurology_II
LRP2BP_Q9P2M1_OID30907_v1_Neurology_II
LRPAP1_P30533_OID21059_v1_Neurology
LRRC25_Q8N386_OID21333_v1_Oncology
LRRC37A2_A6NM11_OID31440_v1_Oncology_II
LRRC38_Q5VT99_OID30924_v1_Neurology_II
LRRC59_Q96AG4_OID30361_v1_Cardiometabolic_II
LRRFIP1_Q32MZ4_OID31344_v1_Oncology_II
LRRN1_Q6UXK5_OID20438_v1_Inflammation
LRTM1_Q9HBL6_OID30906_v1_Neurology_II
LRTM2_Q8N967_OID31020_v1_Neurology_II
LSM1_O15116_OID21210_v1_Oncology
LSM8_O95777_OID31269_v1_Oncology_II
LSP1_P33241_OID20530_v1_Inflammation
LTA_P01374_OID20586_v1_Inflammation
LTA4H_P09960_OID21452_v1_Oncology
LTB_Q06643_OID31383_v1_Oncology_II
LTBP2_Q14767_OID20254_v1_Cardiometabolic
LTBP3_Q9NS15_OID21191_v1_Oncology
LTBR_P36941_OID20768_v1_Inflammation
LTO1_Q8WV07_OID20434_v1_Inflammation
LUZP2_Q86TE4_OID31402_v1_Oncology_II
LXN_Q9BS40_OID21003_v1_Neurology
LY6D_Q14210_OID20708_v1_Inflammation
LY75_O60449_OID20580_v1_Inflammation
LY9_Q9HBG7_OID20670_v1_Inflammation
LY96_Q9Y6Y9_OID20945_v1_Neurology
LYAR_Q9NX58_OID21264_v1_Oncology
LYN_P07948_OID21350_v1_Oncology
LYPD1_Q8N2G4_OID20821_v1_Neurology
LYPD3_O95274_OID21530_v1_Oncology
LYPD8_Q6UX82_OID21251_v1_Oncology
LYPLA2_O95372_OID30817_v1_Neurology_II
LYSMD3_Q7Z3D4_OID30950_v1_Neurology_II
LYVE1_Q9Y5Y7_OID30728_v1_Inflammation_II
LYZL2_Q7Z4W2_OID31180_v1_Oncology_II
LZTFL1_Q9NQ48_OID30637_v1_Inflammation_II
M6PR_P20645_OID30208_v1_Cardiometabolic_II
MAD1L1_Q9Y6D9_OID20904_v1_Neurology
MAEA_Q7L5Y9_OID21206_v1_Oncology
MAG_P20916_OID30967_v1_Neurology_II
MAGEA3_P43357_OID31331_v1_Oncology_II
MAGED1_Q9Y5V3_OID21181_v1_Oncology
MAMDC2_Q7Z304_OID30309_v1_Cardiometabolic_II
MAMDC4_Q6UXC1_OID31342_v1_Oncology_II
MAN1A2_O60476_OID30262_v1_Cardiometabolic_II
MAN2B2_Q9Y2E5_OID30306_v1_Cardiometabolic_II
MANEAL_Q5VSG8_OID31244_v1_Oncology_II
MANF_P55145_OID20707_v1_Inflammation
MANSC1_Q9H8J5_OID21492_v1_Oncology
MANSC4_A6NHS7_OID30141_v1_Cardiometabolic_II
MAP1LC3A_Q9H492_OID30868_v1_Neurology_II
MAP1LC3B2_A6NCE7_OID30074_v1_Cardiometabolic_II
MAP2_P11137_OID31138_v1_Neurology_II
MAP2K1_Q02750_OID31468_v1_Oncology_II
MAP2K6_P52564_OID20552_v1_Inflammation
MAP3K5_Q99683_OID21253_v1_Oncology
MAP4K5_Q9Y4K4_OID20899_v1_Neurology
MAPK13_O15264_OID31205_v1_Oncology_II
MAPK9_P45984_OID20557_v1_Inflammation
MAPKAPK2_P49137_OID31293_v1_Oncology_II
MAPRE3_Q9UPY8_OID31177_v1_Oncology_II
MAPT_P10636_OID20830_v1_Neurology
MARCO_Q9UEW3_OID20210_v1_Cardiometabolic
MARS1_P56192_OID30658_v1_Inflammation_II
MASP1_P48740_OID20954_v1_Neurology
MATN2_O00339_OID20767_v1_Inflammation
MATN3_O15232_OID20979_v1_Neurology
MAVS_Q7Z434_OID21204_v1_Oncology
MAX_P61244_OID20877_v1_Neurology
MB_P02144_OID20263_v1_Cardiometabolic
MBL2_P11226_OID30759_v1_Inflammation_II
MCAM_P43121_OID20343_v1_Cardiometabolic
MCEE_Q96PE7_OID31033_v1_Neurology_II
MCEMP1_Q8IX19_OID30501_v1_Inflammation_II
MCFD2_Q8NI22_OID20171_v1_Cardiometabolic
MCTS1_Q9ULC4_OID31444_v1_Oncology_II
MDGA1_Q8NFP4_OID20951_v1_Neurology
MDH1_P40925_OID30669_v1_Inflammation_II
MDK_P21741_OID21489_v1_Oncology
MDM1_Q8TC05_OID30945_v1_Neurology_II
MECR_Q9BV79_OID30274_v1_Cardiometabolic_II
MED18_Q9BUE0_OID21236_v1_Oncology
MED21_Q13503_OID30066_v1_Cardiometabolic_II
MEGF10_Q96KG7_OID20746_v1_Inflammation
MEGF11_A6BM72_OID30099_v1_Cardiometabolic_II
MEGF9_Q9H1U4_OID20285_v1_Cardiometabolic
MELTF_P08582_OID30347_v1_Cardiometabolic_II
MEP1A_Q16819_OID31459_v1_Oncology_II
MEP1B_Q16820_OID20168_v1_Cardiometabolic
MEPE_Q9NQ76_OID20753_v1_Inflammation
MERTK_Q12866_OID20657_v1_Inflammation
MESD_Q14696_OID21099_v1_Neurology
MET_P08581_OID20269_v1_Cardiometabolic
METAP1_P53582_OID20815_v1_Neurology
METAP1D_Q6UB28_OID20519_v1_Inflammation
METAP2_P50579_OID21437_v1_Oncology
MFAP3_P55082_OID20057_v1_Cardiometabolic
MFAP3L_O75121_OID30933_v1_Neurology_II
MFAP4_P55083_OID30598_v1_Inflammation_II
MFAP5_Q13361_OID20239_v1_Cardiometabolic
MFGE8_Q08431_OID21134_v1_Neurology
MGLL_Q99685_OID20711_v1_Inflammation
MGMT_P16455_OID20588_v1_Inflammation
MIA_Q16674_OID21531_v1_Oncology
MICALL2_Q8IY33_OID30889_v1_Neurology_II
MICB_MICA_Q29980_Q29983_OID20593_v1_Inflammation
MIF_P14174_OID21073_v1_Neurology
MILR1_Q7Z6M3_OID20482_v1_Inflammation
MINDY1_Q8N5J2_OID31399_v1_Oncology_II
MINK1_Q8N4C8_OID31156_v1_Neurology_II
MITD1_Q8WV92_OID20959_v1_Neurology
MKI67_P46013_OID30455_v1_Inflammation_II
MLLT1_Q03111_OID31211_v1_Oncology_II
MLN_P12872_OID20541_v1_Inflammation
MME_P08473_OID21307_v1_Oncology
MMP1_P03956_OID20672_v1_Inflammation
MMP10_P09238_OID20687_v1_Inflammation
MMP12_P39900_OID21439_v1_Oncology
MMP13_P45452_OID20807_v1_Neurology
MMP15_P51511_OID30299_v1_Cardiometabolic_II
MMP3_P08254_OID21083_v1_Neurology
MMP7_P09237_OID20087_v1_Cardiometabolic
MMP8_P22894_OID21019_v1_Neurology
MMP9_P14780_OID21103_v1_Neurology
MMUT_P22033_OID30159_v1_Cardiometabolic_II
MN1_Q10571_OID30908_v1_Neurology_II
MNAT1_P51948_OID31327_v1_Oncology_II
MNDA_P41218_OID20156_v1_Cardiometabolic
MOCS2_O96007_OID30638_v1_Inflammation_II
MOG_Q16653_OID21384_v1_Oncology
MORC3_Q14149_OID31073_v1_Neurology_II
MORF4L1_Q9UBU8_OID31257_v1_Oncology_II
MORF4L2_Q15014_OID31160_v1_Oncology_II
MORN4_Q8NDC4_OID31217_v1_Oncology_II
MPHOSPH8_Q99549_OID20092_v1_Cardiometabolic
MPI_P34949_OID21288_v1_Oncology
MPIG6B_O95866_OID20779_v1_Inflammation
MPO_P05164_OID21100_v1_Neurology
MPRIP_Q6WCQ1_OID31420_v1_Oncology_II
MRC1_P22897_OID30694_v1_Inflammation_II
MRI1_Q9BV20_OID30891_v1_Neurology_II
MRPL24_Q96A35_OID30178_v1_Cardiometabolic_II
MRPL28_Q13084_OID31023_v1_Neurology_II
MRPL46_Q9H2W6_OID20858_v1_Neurology
MRPL52_Q86TS9_OID31239_v1_Oncology_II
MRPL58_Q14197_OID31036_v1_Neurology_II
MRPS16_Q9Y3D3_OID30489_v1_Inflammation_II
MSLN_Q13421_OID21380_v1_Oncology
MSLNL_Q96KJ4_OID30939_v1_Neurology_II
MSMB_P08118_OID20275_v1_Cardiometabolic
MSR1_P21757_OID21063_v1_Neurology
MSRA_Q9UJ68_OID21513_v1_Oncology
MST1_P26927_OID30713_v1_Inflammation_II
MSTN_O14793_OID20115_v1_Cardiometabolic
MTDH_Q86UE4_OID30538_v1_Inflammation_II
MTHFD2_P13995_OID31078_v1_Neurology_II
MTHFSD_Q2M296_OID31305_v1_Oncology_II
MTIF3_Q9H2K0_OID31513_v1_Oncology_II
MTPN_P58546_OID20080_v1_Cardiometabolic
MTR_Q99707_OID30110_v1_Cardiometabolic_II
MTSS1_O43312_OID31492_v1_Oncology_II
MTSS2_Q765P7_OID31409_v1_Oncology_II
MTUS1_Q9ULD2_OID31315_v1_Oncology_II
MUC13_Q9H3R2_OID20866_v1_Neurology
MUC16_Q8WXI7_OID21378_v1_Oncology
MUC2_Q02817_OID30377_v1_Cardiometabolic_II
MUCL3_Q3MIW9_OID31170_v1_Oncology_II
MVK_Q03426_OID20459_v1_Inflammation
MXRA8_Q9BRK3_OID30583_v1_Inflammation_II
MYBPC1_Q00872_OID30296_v1_Cardiometabolic_II
MYBPC2_Q14324_OID30199_v1_Cardiometabolic_II
MYCBP2_O75592_OID30996_v1_Neurology_II
MYDGF_Q969H8_OID30313_v1_Cardiometabolic_II
MYH4_Q9Y623_OID30061_v1_Cardiometabolic_II
MYH7B_A7E2Y1_OID31178_v1_Oncology_II
MYH9_P35579_OID30382_v1_Cardiometabolic_II
MYL1_P05976_OID30120_v1_Cardiometabolic_II
MYL3_P08590_OID30251_v1_Cardiometabolic_II
MYL4_P12829_OID30245_v1_Cardiometabolic_II
MYL6B_P14649_OID30936_v1_Neurology_II
MYO6_Q9UM54_OID30989_v1_Neurology_II
MYO9B_Q13459_OID20451_v1_Inflammation
MYOC_Q99972_OID21121_v1_Neurology
MYOM1_P52179_OID30834_v1_Neurology_II
MYOM2_P54296_OID30131_v1_Cardiometabolic_II
MYOM3_Q5VTT5_OID30633_v1_Inflammation_II
MZB1_Q8WU39_OID20732_v1_Inflammation
MZT1_Q08AG7_OID21186_v1_Oncology
NAA10_P41227_OID30188_v1_Cardiometabolic_II
NAA80_Q93015_OID30893_v1_Neurology_II
NAAA_Q02083_OID20931_v1_Neurology
NACC1_Q96RE7_OID31393_v1_Oncology_II
NADK_O95544_OID20178_v1_Cardiometabolic
NAGA_P17050_OID30509_v1_Inflammation_II
NAGK_Q9UJ70_OID30271_v1_Cardiometabolic_II
NAGPA_Q9UK23_OID30643_v1_Inflammation_II
NAMPT_P43490_OID21227_v1_Oncology
NAP1L4_Q99733_OID31475_v1_Oncology_II
NAPRT_Q6XQN6_OID31114_v1_Neurology_II
NARS1_O43776_OID31035_v1_Neurology_II
NBL1_P41271_OID21486_v1_Oncology
NBN_O60934_OID20442_v1_Inflammation
NCAM1_P13591_OID20354_v1_Cardiometabolic
NCAM2_O15394_OID21095_v1_Neurology
NCAN_O14594_OID21055_v1_Neurology
NCF2_P19878_OID20567_v1_Inflammation
NCK2_O43639_OID20683_v1_Inflammation
NCLN_Q969V3_OID20448_v1_Inflammation
NCR1_O76036_OID20566_v1_Inflammation
NCR3LG1_Q68D85_OID31490_v1_Oncology_II
NCS1_P62166_OID21458_v1_Oncology
NDRG1_Q92597_OID20792_v1_Neurology
NDST1_P52848_OID31369_v1_Oncology_II
NDUFA5_Q16718_OID30520_v1_Inflammation_II
NDUFB7_P17568_OID31521_v1_Oncology_II
NDUFS6_O75380_OID21224_v1_Oncology
NEB_P20929_OID30105_v1_Cardiometabolic_II
NECAP2_Q9NVZ3_OID30089_v1_Cardiometabolic_II
NECTIN1_Q15223_OID30545_v1_Inflammation_II
NECTIN2_Q92692_OID20222_v1_Cardiometabolic
NECTIN4_Q96NY8_OID21490_v1_Oncology
NEDD4L_Q96PU5_OID30521_v1_Inflammation_II
NEDD9_Q14511_OID30503_v1_Inflammation_II
NEFL_P07196_OID20871_v1_Neurology
NEK7_Q8TDX7_OID31250_v1_Oncology_II
NELL1_Q92832_OID21494_v1_Oncology
NELL2_Q99435_OID20706_v1_Inflammation
NENF_Q9UMX5_OID31354_v1_Oncology_II
NEO1_Q92859_OID31066_v1_Neurology_II
NEXN_Q0ZGT2_OID30678_v1_Inflammation_II
NFASC_O94856_OID20634_v1_Inflammation
NFAT5_O94916_OID30522_v1_Inflammation_II
NFATC1_O95644_OID20545_v1_Inflammation
NFATC3_Q12968_OID20470_v1_Inflammation
NFE2_Q16621_OID30268_v1_Cardiometabolic_II
NFIC_P08651_OID30988_v1_Neurology_II
NFKB1_P19838_OID30160_v1_Cardiometabolic_II
NFKB2_Q00653_OID31258_v1_Oncology_II
NFKBIE_O00221_OID21212_v1_Oncology
NFU1_Q9UMS0_OID31510_v1_Oncology_II
NFX1_Q12986_OID30158_v1_Cardiometabolic_II
NFYA_P23511_OID30134_v1_Cardiometabolic_II
NGF_P01138_OID20920_v1_Neurology
NGFR_P08138_OID30300_v1_Cardiometabolic_II
NGRN_Q9NPE2_OID31115_v1_Neurology_II
NHLRC3_Q5JS37_OID30614_v1_Inflammation_II
NID1_P14543_OID20362_v1_Cardiometabolic
NID2_Q14112_OID21085_v1_Neurology
NINJ1_Q92982_OID21167_v1_Oncology
NIT1_Q86X76_OID30252_v1_Cardiometabolic_II
NIT2_Q9NQR4_OID30336_v1_Cardiometabolic_II
NLGN1_Q8N2Q7_OID30900_v1_Neurology_II
NLGN2_Q8NFZ4_OID30878_v1_Neurology_II
NME1_P15531_OID30451_v1_Inflammation_II
NME3_Q13232_OID20789_v1_Inflammation
NMI_Q13287_OID31378_v1_Oncology_II
NMNAT1_Q9HAN9_OID20913_v1_Neurology
NMRK2_Q9NPI5_OID31163_v1_Oncology_II
NMT1_P30419_OID31021_v1_Neurology_II
NOMO1_Q15155_OID21106_v1_Neurology
NOP56_O00567_OID30055_v1_Cardiometabolic_II
NOS1_P29475_OID20863_v1_Neurology
NOS2_P35228_OID30087_v1_Cardiometabolic_II
NOS3_P29474_OID20834_v1_Neurology
NOTCH1_P46531_OID20311_v1_Cardiometabolic
NOTCH2_Q04721_OID30407_v1_Cardiometabolic_II
NOTCH3_Q9UM47_OID20253_v1_Cardiometabolic
NPC2_P61916_OID30418_v1_Cardiometabolic_II
NPDC1_Q9NQX5_OID20205_v1_Cardiometabolic
NPHS1_O60500_OID30540_v1_Inflammation_II
NPHS2_Q9NP85_OID30462_v1_Inflammation_II
NPL_Q9BXD5_OID30329_v1_Cardiometabolic_II
NPM1_P06748_OID20961_v1_Neurology
NPPB_P16860_OID20049_v1_Cardiometabolic
NPPC_P23582_OID20568_v1_Inflammation
NPR1_P16066_OID30116_v1_Cardiometabolic_II
NPTN_Q9Y639_OID21235_v1_Oncology
NPTX1_Q15818_OID21074_v1_Neurology
NPTX2_P47972_OID30390_v1_Cardiometabolic_II
NPTXR_O95502_OID20191_v1_Cardiometabolic
NPY_P01303_OID21388_v1_Oncology
NRCAM_Q92823_OID20229_v1_Cardiometabolic
NRGN_Q92686_OID30674_v1_Inflammation_II
NRN1_Q9NPD7_OID30983_v1_Neurology_II
NRP1_O14786_OID20390_v1_Cardiometabolic
NRP2_O60462_OID21081_v1_Neurology
NRTN_Q99748_OID20465_v1_Inflammation
NRXN3_Q9Y4C0_OID30901_v1_Neurology_II
NSFL1C_Q9UNZ2_OID21022_v1_Neurology
NT5C_Q8TCD5_OID30294_v1_Cardiometabolic_II
NT5C1A_Q9BXI3_OID31102_v1_Neurology_II
NT5C3A_Q9H0P0_OID20553_v1_Inflammation
NT5E_P21589_OID21498_v1_Oncology
NTF3_P20783_OID20591_v1_Inflammation
NTF4_P34130_OID21208_v1_Oncology
NTRK2_Q16620_OID20136_v1_Cardiometabolic
NTRK3_Q16288_OID21057_v1_Neurology
NUB1_Q9Y5A7_OID20510_v1_Inflammation
NUBP1_P53384_OID31412_v1_Oncology_II
NUCB2_P80303_OID21448_v1_Oncology
NUDC_Q9Y266_OID20623_v1_Inflammation
NUDT10_Q8NFP7_OID30198_v1_Cardiometabolic_II
NUDT15_Q9NV35_OID30102_v1_Cardiometabolic_II
NUDT16_Q96DE0_OID31484_v1_Oncology_II
NUDT2_P50583_OID21308_v1_Oncology
NUDT5_Q9UKK9_OID21115_v1_Neurology
NUMB_P49757_OID30568_v1_Inflammation_II
NUP50_Q9UKX7_OID30100_v1_Cardiometabolic_II
NXPE4_Q6UWF7_OID30076_v1_Cardiometabolic_II
NXPH1_P58417_OID20849_v1_Neurology
NXPH3_O95157_OID30565_v1_Inflammation_II
OBP2B_Q9NPH6_OID20980_v1_Neurology
OCLN_Q16625_OID31069_v1_Neurology_II
ODAM_A1E959_OID20793_v1_Neurology
OFD1_O75665_OID31268_v1_Oncology_II
OGA_O60502_OID31465_v1_Oncology_II
OGFR_Q9NZT2_OID21360_v1_Oncology
OGN_P20774_OID21123_v1_Neurology
OGT_O15294_OID31300_v1_Oncology_II
OLFM4_Q6UX06_OID30665_v1_Inflammation_II
OLR1_P78380_OID20183_v1_Cardiometabolic
OMD_Q99983_OID20725_v1_Inflammation
OMG_P23515_OID21352_v1_Oncology
OMP_P47874_OID30835_v1_Neurology_II
OPHN1_O60890_OID31087_v1_Neurology_II
OPLAH_O14841_OID30201_v1_Cardiometabolic_II
OPTC_Q9UBM4_OID21362_v1_Oncology
ORM1_P02763_OID30768_v1_Inflammation_II
OSBPL2_Q9H1P3_OID31085_v1_Neurology_II
OSCAR_Q8IYS5_OID20776_v1_Inflammation
OSM_P13725_OID20574_v1_Inflammation
OSMR_Q99650_OID20356_v1_Cardiometabolic
OSTN_P61366_OID30909_v1_Neurology_II
OTOA_Q7RTW8_OID30825_v1_Neurology_II
OTUD6B_Q8N6M0_OID31487_v1_Oncology_II
OTUD7B_Q6GQQ9_OID31064_v1_Neurology_II
OXCT1_P55809_OID30227_v1_Cardiometabolic_II
OXT_P01178_OID21047_v1_Neurology
P4HB_P07237_OID21509_v1_Oncology
PACS2_Q86VP3_OID30186_v1_Cardiometabolic_II
PADI2_Q9Y2J8_OID20467_v1_Inflammation
PADI4_Q9UM07_OID20832_v1_Neurology
PAEP_P09466_OID20925_v1_Neurology
PAFAH1B3_Q15102_OID30998_v1_Neurology_II
PAFAH2_Q99487_OID31286_v1_Oncology_II
PAG1_Q9NWQ8_OID20108_v1_Cardiometabolic
PAGR1_Q9BTK6_OID30206_v1_Cardiometabolic_II
PAIP2B_Q9ULR5_OID31228_v1_Oncology_II
PAK4_O96013_OID20819_v1_Neurology
PALLD_Q8WX93_OID30444_v1_Inflammation_II
PALM_O75781_OID31515_v1_Oncology_II
PALM3_A6NDB9_OID30182_v1_Cardiometabolic_II
PAM_P19021_OID20291_v1_Cardiometabolic
PAMR1_Q6UXH9_OID21153_v1_Neurology
PAPPA_Q13219_OID20421_v1_Inflammation
PARD3_Q8TEW0_OID31301_v1_Oncology_II
PARK7_Q99497_OID21160_v1_Neurology
PARP1_P09874_OID20500_v1_Inflammation
PAXX_Q9BUH6_OID30591_v1_Inflammation_II
PBK_Q96KB5_OID31158_v1_Oncology_II
PBLD_P30039_OID20839_v1_Neurology
PBXIP1_Q96AQ6_OID31435_v1_Oncology_II
PCARE_A6NGG8_OID30838_v1_Neurology_II
PCBD1_P61457_OID30610_v1_Inflammation_II
PCBP2_Q15366_OID31003_v1_Neurology_II
PCDH1_Q08174_OID20614_v1_Inflammation
PCDH12_Q9NPG4_OID31045_v1_Neurology_II
PCDH17_O14917_OID20132_v1_Cardiometabolic
PCDH7_O60245_OID31456_v1_Oncology_II
PCDH9_Q9HC56_OID31516_v1_Oncology_II
PCDHB15_Q9Y5E8_OID31377_v1_Oncology_II
PCNA_P12004_OID31161_v1_Oncology_II
PCOLCE_Q15113_OID20384_v1_Cardiometabolic
PCSK7_Q16549_OID31410_v1_Oncology_II
PCSK9_Q8NBP7_OID20235_v1_Cardiometabolic
PCYT2_Q99447_OID31519_v1_Oncology_II
PDAP1_Q13442_OID30323_v1_Cardiometabolic_II
PDCD1_Q15116_OID21396_v1_Oncology
PDCD1LG2_Q9BQ51_OID21273_v1_Oncology
PDCD5_O14737_OID21021_v1_Neurology
PDCD6_O75340_OID20163_v1_Cardiometabolic
PDCL2_Q8N4E4_OID31168_v1_Oncology_II
PDE1C_Q14123_OID31201_v1_Oncology_II
PDE4D_Q08499_OID30084_v1_Cardiometabolic_II
PDE5A_O76074_OID30584_v1_Inflammation_II
[truncated: 919 more rows]
