# Supplementary material for: NLRC5-Mediated Epigenetic and Proteomic Regulation of Microglial Panoptosis Drives Neuroinflammation in Multiple Sclerosis
Source: Research Square preprint supplement (doi:10.21203/rs.3.rs-6759227/v1), 2025-06-26
Supplement: Supplementary file 17 [file f1f9a5fa1cdb160bc38dc6f2.docx]

a

b


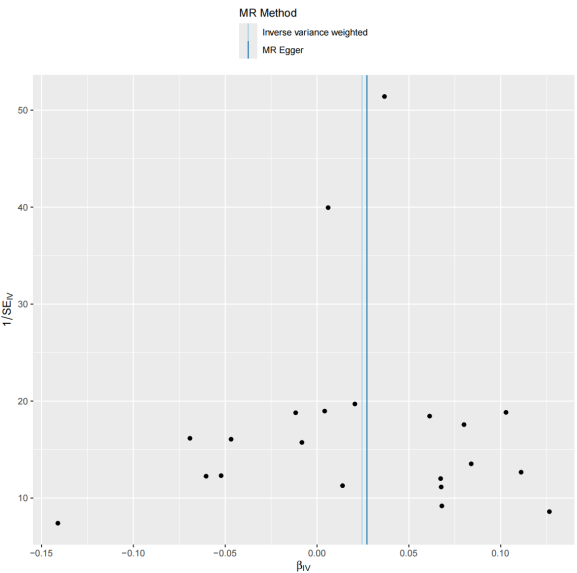

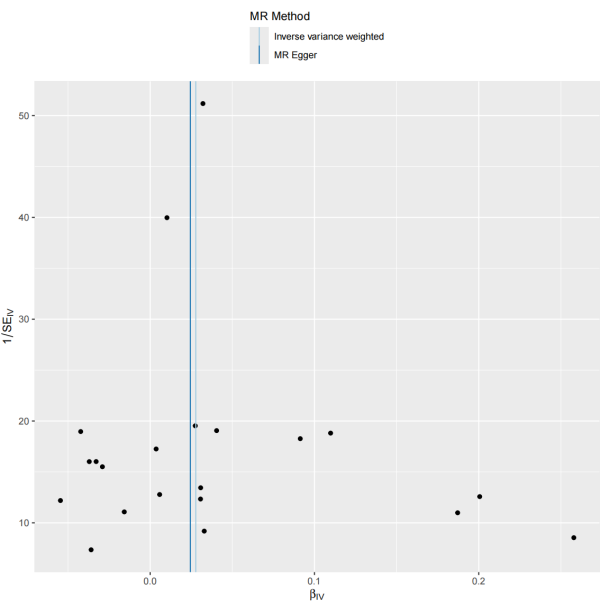


c

d


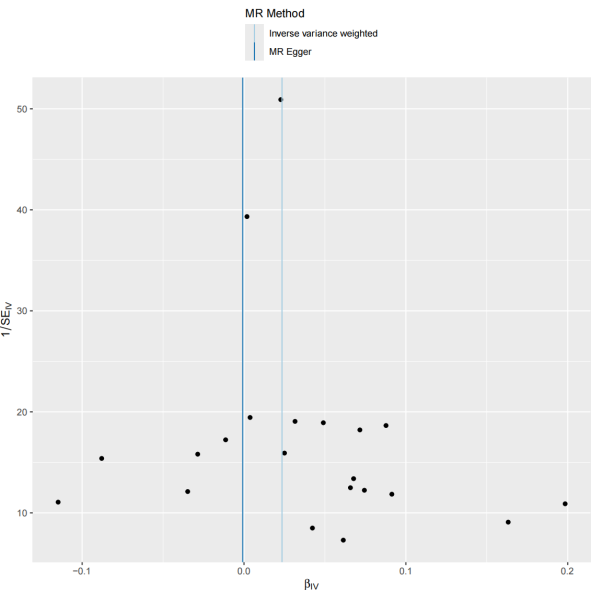

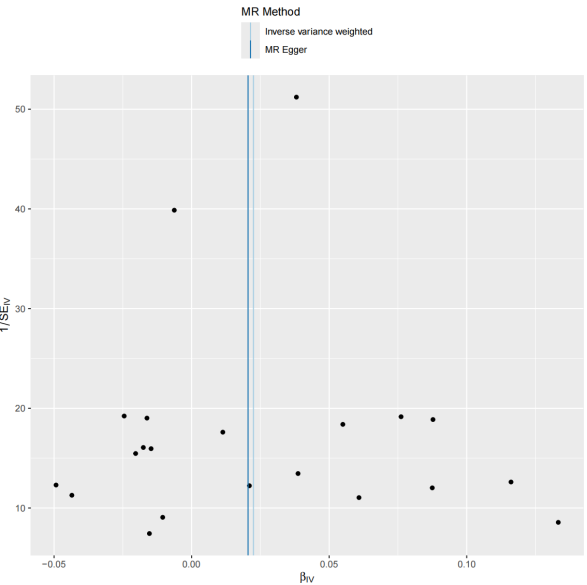


e

f


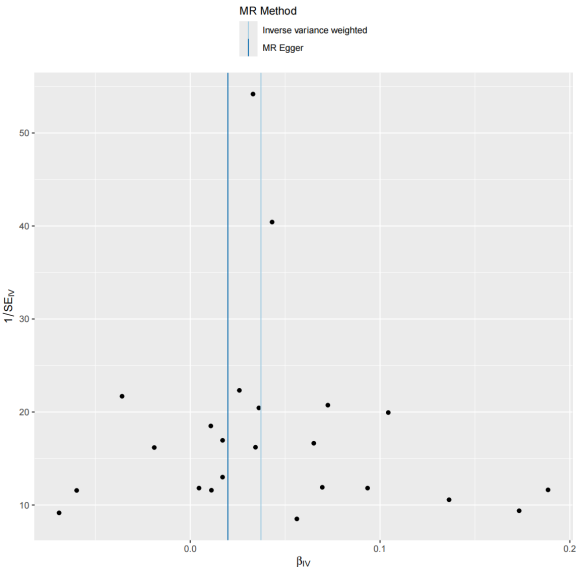

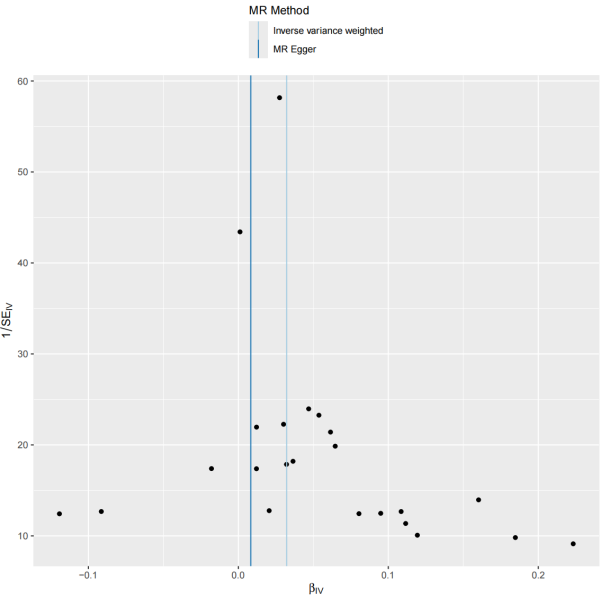


g

h


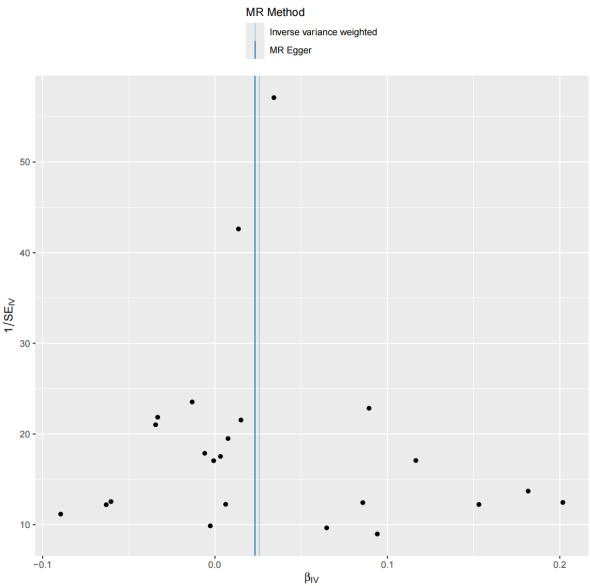

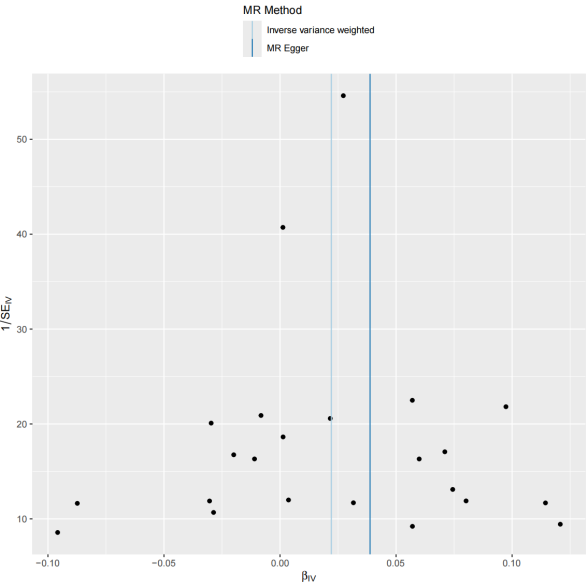


**Figure S4. Funnel plots assessing directional pleiotropy of NLRC5 expression quantitative trait loci (eQTL)-associated SNPs across cohorts.**

(a–d) Funnel plots of SNP-specific causal effect estimates (β) against precision (1/SE) for NLRC5 eQTL effects on GABARAP, BRSK2, TNFSF12, and BCL2 pQTLs in the deCODE Iceland cohort. Asymmetry was evaluated via MR-Egger regression intercept tests (reported in lower-left corners). The solid vertical line indicates inverse-variance weighted (IVW) pooled estimates, with dashed lines representing 95% confidence intervals.

(e–h) Corresponding funnel plots for NLRC5 eQTL effects on GABARAP, BRSK2, TNFSF12, and BCL2 pQTLs in the UK Biobank Pharma Proteomics Project (UKB-PPP).
