# Supplementary material for: NLRC5-Mediated Epigenetic and Proteomic Regulation of Microglial Panoptosis Drives Neuroinflammation in Multiple Sclerosis
Source: Research Square preprint supplement (doi:10.21203/rs.3.rs-6759227/v1), 2025-06-26
Supplement: Supplementary file 18 [file fb237219668ba461429f9db9.xlsx]

## Sheet: Sheet1
	NLRC5	ZBP1	ASC	caspase8	β-actin	RIPK3	NLRC5/β-actin	ZBP1/β-actin	ASC/β-actin	caspase8/β-actin	RIPK3/β-actin
BV2 normal control	56110	21307	109771	99449	134263	74514	0.417911	0.158696	0.817582	0.740703	0.574351
BV2 microglia+100ng/ml LPS	170653	78357	158084	208174	138340	109105	1.23358	0.566409	1.14272	1.5048	0.828681
BV2 normal control	112167	32969	120724	86668	134361	90493	0.834818	0.245376	0.898505	0.645038	0.678313
BV2 microglia+100ng/ml LPS	153023	91735	145857	192378	129919	132360	1.17783	0.706094	1.12268	1.48075	0.983826
BV2 normal control	110586	36051	128021	88295	127270	115319	0.868909	0.283264	1.0059	0.693761	0.838421
BV2 microglia+100ng/ml LPS	164377	110172	165067	197788	135887	159524	1.20966	0.810762	1.21474	1.45553	1.16622
	NLRC5 (Normalized)	ZBP1 (Normalized)	ASC (Normalized)	caspase8 (Normalized)	RIPK3 (Normalized)		NLRC5 (Normalized to β-actin)	ZBP1 (Normalized to β-actin)	ASC (Normalized to β-actin)	caspase8 (Normalized to β-actin)	RIPK3 (Normalized to β-actin)
BV2 normal control	0.590927	0.692657	0.901086	1.06858	0.823999		0.707213	0.229112	0.907329	0.693168	0.697028
BV2 microglia+100ng/ml LPS	1.74428	2.47219	1.25943	2.1709	1.18888
BV2 normal control	1.18043	1.07099	0.990274	0.930566	0.973149
BV2 microglia+100ng/ml LPS	1.66546	3.08187	1.23734	2.13621	1.41146
BV2 normal control	1.22864	1.23636	1.10864	1.00086	1.20285
BV2 microglia+100ng/ml LPS	1.71046	3.53871	1.33881	2.09983	1.67313
